# Supplementary material for: Treatment gap and barriers to access mental healthcare among women with postpartum depression symptoms in Pakistan
Source: PeerJ. 2024 Jul 18;12:e17711. doi: 10.7717/peerj.17711 (PMC11260416; doi:10.7717/peerj.17711)
Supplement: Supplemental Information 1 [file peerj-12-17711-s001.xlsx]

## Sheet: Sheet1
What is your age?	What is your area of residence ?	What is your education?	What is your employment status	What is your husband’s employment status	What is the gender of your children	What is the duration of your marriage	What is your household monthly income	What are your living arrangements.	What is your Gestational age?	Gender of new born	What is the type of your delivery.	What is the birth location of newborn	Is it your first delivery	Any previous miscarriage	new born alive	There is a special person who is around me when I am in need.	There is a special person with whom I can share my joys and sorrows.	My family really tries to help me.	I have a special person who is a real source of comfort to me.	My friends really try to help me.	I can count on my friends when things go wrong.	I can talk about my problems with my family.	I have friends with whom I can share my joys and sorrows.	There is a special person in my life who cares about my feelings.	I can talk about my problems with my friends.	I have been able to laugh and see the funny side of things.	I have looked forward with enjoyment to things	I have been anxious or worried for no good reason	I have blamed myself unnecessarily when things went wrong	I have felt scared or panicky for no very good reason	Things have been getting on top of me	I have been so unhappy that I have had difficulty sleeping	I have felt sad or miserable	I have been so unhappy that I have been crying	The thought of harming myself has occurred to me	did your score is 13 or higher ?	did you seek help from your husband?	did you seek help from your friend?	did you seek help from your parents?	did you seek help from your other relatives or family member?	did you seek help from Mental health professional (e. g. psychologist)	did you seek help from any Phone helpline	did you seek help from Doctor / General physician?	did you seek help from religious leader?	I seek help from a0ther 0t listed above	Was there a time when you thought you need a doctor, counselor or other health professionals for your mental distress?	Concern about what my family might think, say, do or feel if i get mental healthcare۔	Concern that I might be seen as weak for having a mental health problem ۔	Feeling embarrassed or ashamed for having a mental health problem
26-34	Urban	No Formal education	Not Employed	Employed	More female babies	2 to 6 years	26,000 – 50,000	With Spouse’s extended family	9 months	male	C- section	Private hospital	Yes	No	Yes	6	6	6	5	6	6	5	5	5	5	1	1	2	2	2	2	1	1	1	2	1	1	1	1	0	0	0	1	1	0	0	1	2	2
26-34	Urban	Primary	Not Employed	Employed	More female babies	2 to 6 years	26,000 – 50,000	Own house	Less than 9 months	male	Simple Vaginal delivery (Normal)	Government hospital	No	No	Yes	5	3	4	5	4	4	5	4	5	4	0	1	1	3	2	1	1	2	1	0	1	1	0	0	0	0	0	0	0	0	0	2	2	2
26-34	Urban	Primary	Not Employed	Employed	More female babies	2 to 6 years	25,000 PKR or less	With Spouse’s extended family	Less than 9 months	Female	C- section	Government hospital	No	No	Yes	4	5	5	5	5	5	5	5	5	5	2	1	3	2	1	2	2	2	1	0	1	0	0	1	0	0	0	0	0	0	0	2	2	0
35-44	Urban	No Formal education	Not Employed	Employed	More female babies	2 to 6 years	25,000 PKR or less	With Spouse’s extended family	Less than 9 months	Female	C- section	Government hospital	No	No	Yes	4	5	3	3	5	5	5	5	3	5	1	1	3	2	2	1	2	1	1	1	1	1	0	0	0	0	0	0	0	0	0	2	1	2
26-34	Urban	Primary	Not Employed	Employed	More female babies	More than 6 years	26,000 – 50,000	With Spouse’s extended family	Less than 9 months	Female	C- section	Government hospital	No	No	Yes	5	3	5	5	5	5	5	6	6	5	1	1	1	3	2	2	2	1	3	0	1	1	1	0	0	0	0	0	0	0	0	2	2	2
16-25	Urban	High School	Not Employed	Not Employed	More female babies	2 to 6 years	50,000 – 1 lac PKR	Own house	9 months	male	C- section	Government hospital	No	No	Yes	5	5	3	5	3	5	5	5	5	5	1	1	1	1	1	2	2	2	2	2	1	1	0	0	0	0	0	0	0	0	0	1	1	1
26-34	Urban	High School	Not Employed	Not Employed	More female babies	2 to 6 years	26,000 – 50,000	With Spouse’s extended family	Less than 9 months	Female	Simple Vaginal delivery (Normal)	Government hospital	No	No	Yes	6	6	5	6	5	5	5	5	6	5	1	1	1	2	1	2	2	1	2	1	1	1	1	1	0	0	0	0	0	0	0	0	0	0
16-25	Urban	High School	Not Employed	Not Employed	More female babies	More than 6 years	26,000 – 50,000	With Spouse’s extended family	Less than 9 months	Female	Simple Vaginal delivery (Normal)	Government hospital	No	No	Yes	3	3	4	2	5	5	5	5	5	5	2	1	3	3	0	1	2	2	2	0	1	0	0	0	0	0	0	0	1	0	0	2	1	2
26-34	Urban	Middle	Not Employed	Employed	Equal number of male and female babies	More than 6 years	26,000 – 50,000	With Spouse’s extended family	9 months	male	C- section	Government hospital	No	Yes	Yes	3	5	5	5	5	5	5	5	5	6	2	1	1	2	3	2	2	1	1	0	1	0	1	1	0	0	0	0	0	0	0	2	0	2
26-34	Urban	High School	Not Employed	Not Employed	More female babies	More than 6 years	26,000 – 50,000	With Spouse’s extended family	9 months	male	C- section	Government hospital	No	Yes	Yes	5	5	5	5	5	5	5	5	6	7	1	2	1	2	2	1	1	1	3	0	1	1	1	0	0	0	0	0	0	0	0	2	1	2
26-34	Urban	Bachelors	Not Employed	Employed	More female babies	More than 6 years	50,000 – 1 lac PKR	Own house	9 months	Female	Simple Vaginal delivery (Normal)	Government hospital	No	No	Yes	5	5	5	5	6	5	7	7	5	7	2	1	2	2	2	2	2	2	2	2	1	1	0	0	0	0	0	1	0	0	0	2	2	2
26-34	Urban	Primary	Not Employed	Employed	More female babies	More than 6 years	25,000 PKR or less	With Spouse’s extended family	9 months	Female	C- section	Government hospital	No	No	Yes	7	5	5	5	5	5	3	3	6	3	2	2	2	2	1	2	2	1	1	0	1	0	0	0	0	0	0	0	0	0	1	3	2	2
26-34	Urban	High School	Employed	Employed	Equal number of male and female babies	More than 6 years	26,000 – 50,000	Own house	9 months	male	C- section	Government hospital	No	No	Yes	5	5	5	5	5	5	6	6	5	7	2	2	2	1	1	3	2	1	2	0	1	1	1	1	1	0	0	0	0	0	0	1	1	2
26-34	Urban	Primary	Not Employed	Employed	More female babies	2 to 6 years	26,000 – 50,000	With Spouse’s extended family	9 months	male	Simple Vaginal delivery (Normal)	Government hospital	Yes	No	Yes	5	5	5	5	5	5	5	5	5	5	0	1	1	2	2	1	2	2	2	2	1	1	0	1	0	0	0	0	0	0	0	3	3	2
35-44	Urban	Bachelors	Not Employed	Employed	More female babies	More than 6 years	26,000 – 50,000	With Spouse’s extended family	9 months	male	Simple Vaginal delivery (Normal)	Government hospital	No	No	Yes	5	5	5	5	5	5	5	5	4	5	1	0	1	3	2	3	3	3	3	0	1	1	0	0	0	0	0	0	0	0	0	1	1	2
26-34	Urban	Primary	Not Employed	Employed	More female babies	More than 6 years	26,000 – 50,000	With Spouse’s extended family	Less than 9 months	Female	C- section	Government hospital	No	No	Yes	5	5	5	5	5	5	5	5	5	5	1	1	2	2	1	2	1	1	2	0	1	0	0	0	0	0	0	0	0	0	0	2	2	2
26-34	Urban	No Formal education	Employed	Not Employed	More female babies	2 to 6 years	26,000 – 50,000	With Spouse’s extended family	9 months	Female	Simple Vaginal delivery (Normal)	Government hospital	Yes	No	Yes	5	6	5	5	5	5	5	5	5	5	3	0	3	2	3	2	2	2	2	0	1	0	0	1	0	0	0	0	0	0	0	2	2	2
26-34	Urban	High School	Employed	Employed	More female babies	More than 6 years	50,000 – 1 lac PKR	Own house	9 months	Female	C- section	Private hospital	Yes	No	Yes	7	7	5	7	4	4	5	4	7	4	1	2	0	3	1	3	1	2	2	1	1	1	0	1	0	1	0	1	0	0	0	0	0	0
35-44	Urban	Bachelors	Employed	Employed	More female babies	More than 6 years	50,000 – 1 lac PKR	Own house	9 months	Female	C- section	Private hospital	No	No	Yes	7	7	5	7	7	7	6	5	7	5	2	2	1	2	1	2	3	3	3	1	1	1	1	1	0	1	0	1	0	0	0	0	0	0
26-34	Urban	Primary	Not Employed	Employed	More female babies	More than 6 years	26,000 – 50,000	Own house	9 months	male	C- section	Government hospital	No	Yes	Yes	5	6	5	6	5	5	5	6	5	3	1	2	1	2	2	1	1	1	2	3	1	1	0	0	0	0	0	0	0	0	0	2	2	2
26-34	Urban	High School	Not Employed	Not Employed	Equal number of male and female babies	2 to 6 years	25,000 PKR or less	With Spouse’s extended family	9 months	Female	C- section	Government hospital	No	Yes	Yes	5	5	4	6	5	1	6	3	5	4	2	1	2	1	2	1	3	1	1	0	1	1	0	0	0	0	0	0	0	0	0	2	2	1
26-34	Urban	High School	Not Employed	Employed	More female babies	2 to 6 years	50,000 – 1 lac PKR	Own house	9 months	male	Simple Vaginal delivery (Normal)	Government hospital	No	Yes	Yes	2	2	2	3	3	3	3	3	5	3	0	0	1	2	2	3	1	1	1	1	1	0	0	1	0	0	0	0	0	0	0	3	2	2
35-44	Urban	Primary	Not Employed	Employed	Equal number of male and female babies	2 to 6 years	26,000 – 50,000	With Spouse’s extended family	9 months	male	Simple Vaginal delivery (Normal)	Government hospital	No	No	Yes	5	5	5	5	5	5	5	5	5	5	0	1	3	2	2	1	2	1	1	2	1	0	0	0	1	0	0	0	0	0	0	2	1	2
26-34	Urban	Primary	Not Employed	Employed	More female babies	More than 6 years	26,000 – 50,000	With Spouse’s extended family	Less than 9 months	Female	C- section	Government hospital	No	Yes	Yes	5	5	5	5	3	3	5	3	6	4	0	0	1	3	3	2	1	1	1	0	1	1	0	0	0	0	0	0	0	0	0	2	0	0
26-34	Urban	High School	Not Employed	Employed	More female babies	More than 6 years	26,000 – 50,000	With Spouse’s extended family	Less than 9 months	Female	C- section	Government hospital	No	No	Yes	5	6	5	6	4	5	5	5	5	5	2	1	2	2	3	2	2	3	3	3	1	1	0	1	0	0	0	0	0	0	0	2	2	2
35-44	Urban	Middle	Not Employed	Employed	More female babies	More than 6 years	26,000 – 50,000	With Spouse’s extended family	Less than 9 months	Female	Simple Vaginal delivery (Normal)	Government hospital	No	Yes	Yes	3	6	5	6	5	5	5	5	5	5	1	1	1	2	0	0	3	3	2	1	1	1	0	1	0	0	0	0	0	0	0	1	1	1
26-34	Urban	High School	Not Employed	Employed	Equal number of male and female babies	More than 6 years	26,000 – 50,000	With Spouse’s extended family	9 months	male	Simple Vaginal delivery (Normal)	Government hospital	No	No	Yes	5	5	5	3	3	5	3	4	5	5	2	1	2	1	1	1	1	2	3	0	1	0	1	0	0	0	0	0	0	0	0	1	2	1
35-44	Urban	Middle	Not Employed	Employed	More female babies	More than 6 years	26,000 – 50,000	With Spouse’s extended family	9 months	Female	C- section	Government hospital	Yes	No	Yes	5	2	5	6	5	1	3	5	5	5	0	0	3	3	1	2	2	2	2	2	1	1	0	0	0	0	0	0	0	0	0	0	0	0
35-44	Urban	High School	Not Employed	Employed	More female babies	More than 6 years	25,000 PKR or less	With Spouse’s extended family	9 months	Female	C- section	Government hospital	Yes	No	Yes	5	5	5	5	5	3	5	5	5	4	0	1	1	3	2	2	2	2	2	2	1	0	0	1	0	0	0	0	0	0	0	3	1	2
26-34	Urban	High School	Not Employed	Not Employed	More female babies	Less than one year	25,000 PKR or less	With Spouse’s extended family	Less than 9 months	Female	C- section	Government hospital	No	Yes	Yes	5	3	3	3	5	5	3	5	3	5	0	0	3	3	3	2	2	2	2	1	1	0	0	0	1	0	0	0	0	0	0	2	1	1
26-34	Urban	Primary	Not Employed	Employed	More female babies	2 to 6 years	26,000 – 50,000	With Spouse’s extended family	Less than 9 months	Female	C- section	Government hospital	No	Yes	Yes	5	3	5	5	5	5	5	5	5	5	0	0	1	2	2	2	2	2	2	0	1	1	0	0	1	0	0	0	0	0	0	2	1	2
26-34	Urban	High School	Not Employed	Employed	More female babies	2 to 6 years	26,000 – 50,000	Own house	9 months	Female	C- section	Government hospital	No	No	Yes	5	3	5	5	5	3	6	5	5	4	1	2	1	1	2	1	1	2	2	2	1	1	1	1	0	0	0	1	0	0	0	0	0	2
26-34	Urban	Primary	Not Employed	Employed	Equal number of male and female babies	2 to 6 years	50,000 – 1 lac PKR	With Spouse’s extended family	Less than 9 months	male	C- section	Government hospital	No	No	Yes	1	2	2	5	2	3	3	5	5	5	2	1	1	2	1	2	2	2	2	2	1	1	0	0	0	0	0	0	0	0	0	3	0	0
26-34	Urban	Bachelors	Employed	Employed	More male babies	2 to 6 years	50,000 – 1 lac PKR	Own house	9 months	male	C- section	Government hospital	Yes	No	Yes	5	5	5	6	5	4	5	5	5	5	1	0	1	1	2	2	2	1	1	1	1	1	1	0	0	0	0	0	0	0	0	2	1	1
16-25	Urban	High School	Not Employed	Employed	More female babies	2 to 6 years	26,000 – 50,000	With Spouse’s extended family	Less than 9 months	male	C- section	Government hospital	No	Yes	Yes	5	6	6	5	5	5	5	5	5	5	2	2	3	2	3	2	3	3	3	3	1	1	1	1	0	0	0	0	0	0	0	3	2	2
35-44	Urban	High School	Not Employed	Employed	More female babies	2 to 6 years	26,000 – 50,000	With Spouse’s extended family	9 months	Female	Simple Vaginal delivery (Normal)	Government hospital	Yes	No	Yes	5	5	5	3	5	5	3	3	3	3	0	1	1	2	3	1	2	2	1	0	1	0	0	0	0	0	0	0	0	0	1	0	0	1
16-25	Urban	High School	Not Employed	Employed	Equal number of male and female babies	2 to 6 years	26,000 – 50,000	With Spouse’s extended family	9 months	male	Simple Vaginal delivery (Normal)	Government hospital	No	Yes	Yes	6	6	5	6	3	3	5	3	6	3	2	1	1	2	1	1	1	1	1	2	1	1	0	0	0	0	0	0	0	0	0	2	2	2
35-44	Urban	High School	Not Employed	Not Employed	More female babies	2 to 6 years	50,000 – 1 lac PKR	With Spouse’s extended family	Less than 9 months	Female	C- section	Government hospital	No	Yes	Yes	3	5	3	5	5	5	5	3	5	3	1	2	2	1	2	1	1	1	2	1	1	0	0	1	1	0	0	0	0	0	0	2	1	2
26-34	Urban	Middle	Not Employed	Not Employed	More female babies	More than 6 years	50,000 – 1 lac PKR	With Spouse’s extended family	9 months	male	Simple Vaginal delivery (Normal)	Government hospital	No	No	Yes	5	5	5	3	3	3	6	6	4	6	2	1	1	2	2	2	1	2	1	2	1	1	1	1	1	0	0	0	0	0	0	2	3	2
26-34	Urban	High School	Not Employed	Not Employed	Equal number of male and female babies	2 to 6 years	26,000 – 50,000	With Spouse’s extended family	Less than 9 months	Female	Simple Vaginal delivery (Normal)	Government hospital	No	No	Yes	5	6	5	5	5	5	5	6	6	5	1	2	2	2	2	1	1	1	2	0	1	1	0	0	1	0	0	0	0	0	0	3	2	0
26-34	Urban	No Formal education	Not Employed	Not Employed	Equal number of male and female babies	More than 6 years	26,000 – 50,000	With Spouse’s extended family	9 months	male	C- section	Government hospital	No	No	Yes	7	7	7	5	5	5	5	4	7	5	2	1	1	1	1	1	2	2	1	2	1	1	1	1	0	0	0	0	0	0	0	1	1	1
16-25	Urban	High School	Not Employed	Employed	More female babies	More than 6 years	26,000 – 50,000	With Spouse’s extended family	9 months	male	C- section	Government hospital	No	Yes	Yes	5	3	3	3	3	5	6	5	6	7	0	0	1	2	0	3	3	2	2	0	1	1	1	0	0	0	0	0	0	0	0	0	0	3
26-34	Urban	High School	Not Employed	Employed	More female babies	More than 6 years	26,000 – 50,000	With Spouse’s extended family	9 months	Female	Simple Vaginal delivery (Normal)	Government hospital	No	No	Yes	4	5	5	5	3	5	5	5	6	6	2	1	1	1	1	1	3	1	1	0	1	1	0	1	0	0	0	0	1	0	0	2	2	0
26-34	Urban	Middle	Employed	Not Employed	Equal number of male and female babies	More than 6 years	26,000 – 50,000	With Spouse’s extended family	Less than 9 months	male	C- section	Government hospital	No	No	Yes	3	5	6	5	5	5	1	3	5	1	0	0	3	2	1	1	2	1	3	0	1	0	0	1	1	0	0	0	0	1	0	1	1	2
16-25	Urban	High School	Not Employed	Employed	More female babies	2 to 6 years	26,000 – 50,000	With Spouse’s extended family	Less than 9 months	Female	Simple Vaginal delivery (Normal)	Private hospital	Yes	No	Yes	5	6	6	6	4	4	6	4	5	4	2	1	1	2	2	1	1	1	1	1	1	1	0	1	1	0	0	0	0	0	0	1	1	2
35-44	Rural	Middle	Not Employed	Employed	More male babies	More than 6 years	50,000 – 1 lac PKR	With Spouse’s extended family	9 months	male	Simple Vaginal delivery (Normal)	Government hospital	No	No	Yes	5	5	5	5	5	5	5	4	5	3	2	1	1	2	2	2	2	2	1	0	1	1	0	0	0	0	0	0	1	1	0	1	0	1
26-34	Urban	High School	Not Employed	Employed	More female babies	More than 6 years	50,000 – 1 lac PKR	Own house	9 months	male	Simple Vaginal delivery (Normal)	Private hospital	Yes	No	Yes	5	5	5	5	5	5	3	5	5	5	2	2	2	1	3	3	2	2	2	2	1	1	0	1	0	1	0	0	0	0	0	0	0	0
16-25	Rural	High School	Not Employed	Employed	More male babies	More than 6 years	26,000 – 50,000	Own house	Less than 9 months	male	Simple Vaginal delivery (Normal)	Government hospital	Yes	No	Yes	2	5	5	3	1	5	1	5	6	5	2	1	1	2	1	1	2	1	1	0	1	1	0	0	0	0	0	0	0	0	0	2	2	2
35-44	Urban	High School	Not Employed	Employed	More female babies	2 to 6 years	26,000 – 50,000	With Spouse’s extended family	9 months	male	C- section	Government hospital	No	Yes	Yes	5	5	4	5	5	5	5	5	5	5	1	2	1	2	2	1	1	2	2	0	1	0	0	1	1	0	0	0	0	0	0	2	1	2
35-44	Urban	High School	Not Employed	Employed	More female babies	2 to 6 years	26,000 – 50,000	With Spouse’s extended family	9 months	male	Simple Vaginal delivery (Normal)	Government hospital	Yes	No	Yes	5	5	5	5	5	5	5	5	5	5	2	1	2	2	2	2	2	3	2	2	1	1	0	0	0	0	0	0	1	0	0	2	1	2
26-34	Rural	High School	Not Employed	Employed	Equal number of male and female babies	2 to 6 years	26,000 – 50,000	With Spouse’s extended family	9 months	male	C- section	Government hospital	Yes	No	Yes	3	5	5	5	6	5	5	6	5	5	1	0	1	0	3	3	2	2	2	0	1	1	0	0	0	0	0	0	0	0	0	3	1	2
35-44	Urban	High School	Not Employed	Not Employed	More male babies	More than 6 years	26,000 – 50,000	With Spouse’s extended family	Less than 9 months	male	Simple Vaginal delivery (Normal)	Government hospital	Yes	No	Yes	1	5	4	2	4	4	5	4	2	1	0	0	1	1	3	3	2	2	3	3	1	1	0	0	0	0	0	0	1	0	0	2	1	2
35-44	Urban	High School	Not Employed	Employed	More male babies	2 to 6 years	26,000 – 50,000	With Spouse’s extended family	Less than 9 months	male	Simple Vaginal delivery (Normal)	Private hospital	Yes	No	Yes	3	5	5	5	5	5	5	5	5	5	2	1	1	1	2	2	2	2	2	0	1	1	0	0	0	0	0	0	0	0	0	2	2	2
16-25	Rural	High School	Not Employed	Employed	Equal number of male and female babies	More than 6 years	50,000 – 1 lac PKR	Own house	9 months	Female	C- section	Government hospital	No	Yes	Yes	4	5	5	4	4	4	4	4	5	4	2	1	1	1	3	3	2	1	1	0	1	0	0	1	0	0	0	0	0	0	0	2	2	1
45+	Rural	Primary	Not Employed	Employed	More female babies	More than 6 years	26,000 – 50,000	With Spouse’s extended family	Less than 9 months	Female	C- section	Government hospital	No	Yes	Yes	3	4	4	3	3	4	3	4	3	4	2	1	2	2	2	1	3	3	1	2	1	1	0	0	0	0	0	0	0	0	0	2	2	2
26-34	Rural	No Formal education	Not Employed	Employed	More female babies	More than 6 years	25,000 PKR or less	With Spouse’s extended family	Less than 9 months	male	C- section	Government hospital	No	No	Yes	3	5	5	5	5	5	5	5	5	5	0	0	1	2	1	2	2	2	2	0	1	1	0	0	0	0	0	0	0	0	0	2	1	1
26-34	Urban	High School	Not Employed	Employed	More male babies	More than 6 years	26,000 – 50,000	Own house	9 months	male	C- section	Government hospital	No	No	Yes	5	5	5	5	5	5	5	5	5	5	0	1	1	3	1	1	2	2	2	2	1	0	0	1	0	0	0	0	0	0	0	0	0	0
26-34	Urban	Primary	Not Employed	Employed	Equal number of male and female babies	2 to 6 years	26,000 – 50,000	Own house	9 months	male	C- section	Government hospital	No	No	Yes	2	6	6	6	2	4	6	4	5	4	2	2	2	2	2	2	2	2	2	0	1	1	0	0	0	0	0	0	0	0	0	2	3	2
26-34	Rural	High School	Not Employed	Employed	More female babies	More than 6 years	26,000 – 50,000	With Spouse’s extended family	9 months	Female	Simple Vaginal delivery (Normal)	Government hospital	Yes	Yes	Yes	4	5	5	5	5	5	5	5	5	5	2	1	2	2	2	2	2	2	2	0	1	1	1	1	0	0	0	0	0	0	1	3	3	2
26-34	Urban	High School	Not Employed	Employed	More female babies	More than 6 years	50,000 – 1 lac PKR	Own house	Less than 9 months	Female	Simple Vaginal delivery (Normal)	Government hospital	No	No	Yes	1	2	6	5	5	5	5	5	2	6	2	1	1	2	2	1	2	2	2	1	1	1	1	1	1	0	0	0	0	0	0	1	2	2
16-25	Urban	High School	Not Employed	Employed	More female babies	More than 6 years	26,000 – 50,000	With Spouse’s extended family	9 months	Female	Simple Vaginal delivery (Normal)	Government hospital	No	Yes	Yes	6	6	6	6	6	6	6	5	5	6	1	1	1	2	2	3	0	0	3	3	1	1	1	0	0	0	0	0	0	0	0	2	3	3
26-34	Urban	High School	Employed	Not Employed	More female babies	More than 6 years	26,000 – 50,000	With Spouse’s extended family	9 months	Female	C- section	Government hospital	No	No	Yes	3	3	5	3	5	5	5	5	5	6	2	1	2	2	2	2	2	1	2	0	1	0	1	0	0	0	0	0	0	0	0	2	1	2
35-44	Rural	High School	Not Employed	Employed	More female babies	More than 6 years	26,000 – 50,000	With Spouse’s extended family	9 months	Female	C- section	Government hospital	No	No	Yes	5	2	5	5	5	5	5	5	5	3	2	1	0	0	2	1	2	2	3	0	1	1	1	0	0	0	0	0	0	0	0	2	1	1
35-44	Urban	Bachelors	Not Employed	Employed	More female babies	More than 6 years	26,000 – 50,000	With Spouse’s extended family	9 months	Female	Simple Vaginal delivery (Normal)	Government hospital	No	Yes	Yes	3	5	5	5	5	5	5	5	5	5	1	1	1	2	2	2	2	1	2	1	1	1	0	0	0	0	0	0	0	0	0	2	1	2
35-44	Rural	Bachelors	Employed	Employed	Equal number of male and female babies	More than 6 years	50,000 – 1 lac PKR	With Spouse’s extended family	9 months	male	Simple Vaginal delivery (Normal)	Government hospital	No	No	Yes	3	6	6	6	6	6	6	6	6	6	0	0	2	2	2	2	1	3	3	0	1	1	0	1	0	0	0	0	0	0	0	2	1	2
35-44	Rural	High School	Not Employed	Employed	More female babies	2 to 6 years	26,000 – 50,000	With Spouse’s extended family	9 months	Female	Simple Vaginal delivery (Normal)	Government hospital	Yes	No	Yes	5	6	6	6	5	5	6	5	5	5	2	1	2	1	2	2	2	2	2	2	1	1	1	0	0	0	0	0	0	0	0	2	3	3
26-34	Urban	High School	Not Employed	Employed	More male babies	More than 6 years	26,000 – 50,000	With Spouse’s extended family	9 months	male	C- section	Government hospital	No	No	Yes	5	5	5	5	5	5	5	5	5	5	2	1	2	2	2	1	2	2	1		1	1	0	0	0	0	0	0	0	0	0	2	1	2
26-34	Urban	High School	Not Employed	Not Employed	More female babies	More than 6 years	50,000 – 1 lac PKR	With Spouse’s extended family	9 months	Female	C- section	Government hospital	No	No	Yes	5	5	6	5	5	6	6	6	6	5	2	1	2	2	2	2	1	2	2	0	1	1	0	0	0	0	0	0	0	0	0	2	2	3
35-44	Rural	High School	Not Employed	Employed	More male babies	More than 6 years	26,000 – 50,000	With Spouse’s extended family	9 months	Female	Simple Vaginal delivery (Normal)	Government hospital	No	Yes	Yes	5	5	3	5	5	5	5	5	5	5	0	0	2	2	2	3	2	2	2	0	1	1	0	0	0	0	0	0	1	0	0	2	1	1
35-44	Urban	High School	Not Employed	Employed	More female babies	2 to 6 years	26,000 – 50,000	With Spouse’s extended family	9 months	Female	C- section	Government hospital	Yes	No	Yes	1	6	5	6	5	5	6	5	6	5	2	2	2	1	2	2	2	3	2	0	1	0	0	0	1	0	0	0	0	0	0	2	1	2
26-34	Urban	High School	Not Employed	Employed	More female babies	2 to 6 years	50,000 – 1 lac PKR	With Spouse’s extended family	9 months	Female	Simple Vaginal delivery (Normal)	Government hospital	Yes	No	Yes	5	5	7	5	5	5	5	5	5	5	2	1	2	2	2	3	3	2	2	0	1	1	0	0	0	0	0	0	0	0	0	1	1	3
26-34	Urban	High School	Not Employed	Employed	Equal number of male and female babies	More than 6 years	25,000 PKR or less	With Spouse’s extended family	Less than 9 months	male	C- section	Government hospital	No	Yes	Yes	4	4	4	4	4	4	4	4	4	4	2	1	2	1	1	3	3	3	1	1	1	0	0	0	0	0	0	0	0	0	1	0	0	3
35-44	Urban	Middle	Not Employed	Employed	More female babies	More than 6 years	26,000 – 50,000	With Spouse’s extended family	Less than 9 months	male	Simple Vaginal delivery (Normal)	Government hospital	No	No	Yes	4	1	2	3	4	5	6	5	2	1	2	2	2	1	1	3	1	2	0	0	1	1	0	1	0	0	0	0	0	0	0	3	3	3
26-34	Urban	High School	Not Employed	Employed	Equal number of male and female babies	More than 6 years	26,000 – 50,000	Own house	Less than 9 months	Female	C- section	Government hospital	No	No	Yes	5	5	5	5	4	5	5	5	5	5	1	2	2	1	2	3	3	2	3	1	1	0	0	0	1	0	0	0	0	0	0	2	2	0
26-34	Urban	High School	Not Employed	Employed	More female babies	2 to 6 years	26,000 – 50,000	With Spouse’s extended family	9 months	Female	C- section	Government hospital	Yes	No	Yes	5	5	5	5	5	5	5	5	3	5	1	2	1	2	2	2	3	2	3	3	1	1	0	0	1	0	0	0	0	0	0	2	2	2
26-34	Urban	High School	Not Employed	Employed	More female babies	More than 6 years	50,000 – 1 lac PKR	Own house	9 months	male	C- section	Government hospital	No	Yes	Yes	6	6	6	6	6	6	6	6	6	6	3	3	2	0	2	3	3	3	0	3	1	1	0	0	0	0	0	0	0	0	0	1	2	1
35-44	Urban	Primary	Not Employed	Employed	More female babies	More than 6 years	26,000 – 50,000	Own house	9 months	Female	Simple Vaginal delivery (Normal)	Government hospital	No	Yes	Yes	5	3	5	6	5	5	5	5	5	5	1	3	2	2	3	3	3	2	2	1	1	1	0	0	0	0	0	0	0	0	0	1	2	2
26-34	Urban	High School	Not Employed	Employed	More female babies	2 to 6 years	26,000 – 50,000	With Spouse’s extended family	9 months	male	Simple Vaginal delivery (Normal)	Government hospital	No	Yes	Yes	3	5	5	5	5	5	6	5	5	5	1	2	2	1	2	2	3	3	3	3	1	1	0	0	0	0	0	0	0	0	0	2	1	2
26-34	Urban	Middle	Not Employed	Not Employed	Equal number of male and female babies	More than 6 years	26,000 – 50,000	With Spouse’s extended family	Less than 9 months	male	Simple Vaginal delivery (Normal)	Government hospital	No	No	Yes	5	5	5	5	5	5	5	5	5	5	2	2	3	1	2	2	1	2	2	2	1	1	1	1	1	0	0	0	0	0	0	2	2	3
35-44	Urban	High School	Not Employed	Employed	Equal number of male and female babies	More than 6 years	26,000 – 50,000	Own house	Less than 9 months	male	Simple Vaginal delivery (Normal)	Government hospital	Yes	No	Yes	5	5	5	5	5	5	5	5	5	6	0	1	2	2	2	2	2	2	2	1	1	1	1	1	1	0	0	0	0	0	0	2	3	3
35-44	Rural	High School	Not Employed	Employed	More female babies	2 to 6 years	26,000 – 50,000	With Spouse’s extended family	9 months	Female	Simple Vaginal delivery (Normal)	Government hospital	No	Yes	Yes	3	3	3	3	4	4	5	4	4	4	2	2	2	2	3	2	2	2	2	2	1	1	0	0	0	0	0	0	0	0	0	3	2	1
26-34	Urban	High School	Not Employed	Employed	More female babies	2 to 6 years	25,000 PKR or less	With Spouse’s extended family	9 months	male	C- section	Government hospital	No	No	Yes	2	5	5	5	5	5	5	5	5	5	2	2	1	1	1	2	3	3	1	0	1	0	0	0	1	0	0	0	0	0	0	0	0	0
26-34	Urban	High School	Not Employed	Employed	More male babies	2 to 6 years	26,000 – 50,000	With Spouse’s extended family	9 months	male	Simple Vaginal delivery (Normal)	Government hospital	Yes	No	Yes	5	6	6	5	4	4	6	4	4	4	2	2	2	2	2	2	2	2	2	2	1	1	0	0	0	0	0	0	0	0	0	2	2	3
26-34	Urban	High School	Not Employed	Employed	More female babies	2 to 6 years	26,000 – 50,000	With Spouse’s extended family	9 months	Female	Simple Vaginal delivery (Normal)	Government hospital	Yes	No	Yes	1	5	5	5	5	5	5	5	5	5	2	2	2	1	2	2	2	2	1	0	1	1	0	0	0	0	0	0	0	0	0	2	2	2
26-34	Urban	High School	Not Employed	Employed	More female babies	2 to 6 years	26,000 – 50,000	With Spouse’s extended family	9 months	Female	C- section	Government hospital	No	No	Yes	2	2	2	3	3	3	3	3	3	3	2	1	1	1	2	1	1	1	2	0	1	1	0	0	0	0	0	0	0	0	0	2	2	1
35-44	Urban	Middle	Not Employed	Not Employed	More male babies	2 to 6 years	26,000 – 50,000	Own house	9 months	male	Simple Vaginal delivery (Normal)	Government hospital	No	No	Yes	5	5	5	5	5	5	5	5	5	5	2	1	2	1	2	2	2	2	1	0	1	0	0	0	0	0	0	0	0	0	1	1	1	1
35-44	Urban	High School	Not Employed	Employed	Equal number of male and female babies	2 to 6 years	26,000 – 50,000	With Spouse’s extended family	9 months	male	Simple Vaginal delivery (Normal)	Government hospital	No	No	Yes	3	5	5	5	5	5	5	5	5	5	2	1	1	2	1	1	1	1	1	1	1	1	0	0	0	0	0	0	0	0	0	2	2	2
35-44	Urban	Primary	Not Employed	Employed	More male babies	More than 6 years	26,000 – 50,000	Own house	9 months	male	C- section	Government hospital	Yes	No	Yes	3	3	3	3	3	3	3	3	3	3	2	3	1	1	2	2	1	1	1	0	1	0	0	0	1	0	0	0	0	0	0	3	3	3
26-34	Urban	High School	Not Employed	Not Employed	More female babies	2 to 6 years	26,000 – 50,000	With Spouse’s extended family	9 months	male	Simple Vaginal delivery (Normal)	Government hospital	Yes	No	Yes	5	5	5	5	5	5	5	5	5	5	1	1	2	2	3	1	2	1	3	1	1	1	0	0	0	0	0	0	0	0	0	3	3	3
35-44	Urban	High School	Not Employed	Employed	More female babies	More than 6 years	26,000 – 50,000	With Spouse’s extended family	9 months	male	Simple Vaginal delivery (Normal)	Government hospital	No	Yes	Yes	5	5	4	5	4	4	5	5	5	4	1	2	3	1	2	2	1	2	0	0	1	0	0	1	0	0	0	0	0	0	0	1	1	1
26-34	Urban	High School	Not Employed	Employed	More male babies	Less than one year	More than 1 lac PKR	Own house	9 months	male	Simple Vaginal delivery (Normal)	Private hospital	Yes	No	Yes	6	6	6	6	5	5	6	5	6	5	2	1	2	2	2	2	2	2	2	0	1	1	0	0	0	0	0	0	0	0	0	2	2	1
35-44	Urban	High School	Not Employed	Employed	More male babies	2 to 6 years	More than 1 lac PKR	Own house	9 months	male	C- section	Private hospital	No	No	Yes	5	5	5	5	5	5	5	5	5	5	2	0	2	2	2	2	2	1	2	2	1	1	0	1	0	0	0	0	0	0	0	2	1	2
35-44	Urban	High School	Not Employed	Employed	More male babies	2 to 6 years	More than 1 lac PKR	Own house	9 months	Female	C- section	Government hospital	No	No	Yes	5	5	5	5	5	5	5	5	5	5	1	1	3	3	3	1	2	2	1	2	1	1	0	0	0	0	0	0	0	0	0	2	1	1
35-44	Urban	High School	Not Employed	Employed	Equal number of male and female babies	More than 6 years	More than 1 lac PKR	Own house	9 months	Female	C- section	Private hospital	No	No	Yes	5	6	6	5	5	5	5	5	5	4	1	1	2	1	2	2	2	3	1	0	1	0	0	1	0	1	0	0	0	0	0	0	0	0
26-34	Urban	High School	Not Employed	Employed	More female babies	2 to 6 years	50,000 – 1 lac PKR	With Spouse’s extended family	9 months	Female	Simple Vaginal delivery (Normal)	Private hospital	Yes	No	Yes	6	5	5	5	5	6	5	5	5	5	2	1	2	2	2	2	2	2	1	0	1	0	0	0	1	0	0	0	0	0	0	2	3	3
26-34	Urban	Bachelors	Employed	Employed	Equal number of male and female babies	More than 6 years	50,000 – 1 lac PKR	With Spouse’s extended family	9 months	Female	C- section	Government hospital	No	Yes	Yes	3	3	5	3	3	3	5	3	3	3	2	1	3	2	2	2	2	1	1	0	1	1	0	0	0	0	0	0	0	0	0	2	2	2
35-44	Urban	High School	Not Employed	Employed	More male babies	2 to 6 years	26,000 – 50,000	With Spouse’s extended family	9 months	male	Simple Vaginal delivery (Normal)	Government hospital	No	No	Yes	3	3	3	3	3	3	3	3	3	3	1	2	2	2	2	2	1	1	2	2	1	1	0	0	0	0	0	0	0	0	0	0	0	0
35-44	Urban	Middle	Not Employed	Employed	Equal number of male and female babies	More than 6 years	26,000 – 50,000	Own house	9 months	Female	Simple Vaginal delivery (Normal)	Government hospital	No	No	Yes	5	5	5	5	5	5	5	5	5	5	2	1	2	2	2	2	2	2	1	0	1	1	0	0	0	0	0	0	0	0	0	2	0	2
45+	Urban	Primary	Employed	Not Employed	More male babies	2 to 6 years	26,000 – 50,000	Own house	9 months	male	Simple Vaginal delivery (Normal)	Government hospital	No	No	Yes	5	5	3	3	3	3	3	3	3	3	2	1	2	1	2	2	1	2	3	3	1	1	0	0	1	0	0	0	1	0	0	2	3	3
35-44	Urban	No Formal education	Not Employed	Not Employed	More female babies	More than 6 years	50,000 – 1 lac PKR	With Spouse’s extended family	9 months	Female	C- section	Government hospital	No	No	Yes	3	5	5	5	5	1	2	3	7	4	2	1	2	1	2	3	1	2	2	2	1	0	0	0	0	0	0	0	0	1	1	2	1	2
35-44	Urban	High School	Not Employed	Employed	Equal number of male and female babies	More than 6 years	50,000 – 1 lac PKR	Own house	9 months	Female	Simple Vaginal delivery (Normal)	Private hospital	No	Yes	Yes	3	5	5	5	5	5	5	5	5	5	0	1	3	1	1	2	2	2	1	0	1	0	0	1	0	0	1	0	0	0	0	2	1	1
35-44	Urban	High School	Not Employed	Employed	More female babies	2 to 6 years	26,000 – 50,000	With Spouse’s extended family	Less than 9 months	Female	Simple Vaginal delivery (Normal)	Private hospital	Yes	No	Yes	3	3	3	3	3	3	3	3	3	3	1	1	1	2	2	1	2	1	1	1	1	0	0	0	1	0	0	0	0	0	0	2	3	3
26-34	Urban	High School	Not Employed	Employed	Equal number of male and female babies	More than 6 years	50,000 – 1 lac PKR	With Spouse’s extended family	Less than 9 months	Female	Simple Vaginal delivery (Normal)	Private hospital	No	No	Yes	1	1	3	5	7	7	1	6	4	7	2	1	2	2	2	2	2	2	2	0	1	0	1	0	0	0	0	0	0	0	0	3	3	3
26-34	Urban	No Formal education	Not Employed	Employed	Equal number of male and female babies	More than 6 years	26,000 – 50,000	With Spouse’s extended family	9 months	Female	C- section	Government hospital	No	No	Yes	5	5	3	5	5	5	5	5	5	5	2	1	2	2	2	2	2	3	2	3	1	1	1	0	0	0	0	0	0	0	0	2	2	1
26-34	Urban	No Formal education	Not Employed	Employed	More male babies	More than 6 years	26,000 – 50,000	Own house	9 months	male	C- section	Government hospital	No	No	Yes	2	5	5	5	5	5	5	5	5	5	2	1	2	1	2	2	2	2	2	2	1	1	0	0	0	0	0	0	0	0	1	0	0	0
35-44	Urban	Middle	Not Employed	Employed	Equal number of male and female babies	More than 6 years	26,000 – 50,000	With Spouse’s extended family	9 months	male	C- section	Government hospital	No	No	Yes	2	6	2	6	4	4	4	4	5	4	3	3	2	3	2	3	3	3	3	0	1	0	0	1	0	0	0	0	0	0	0	0	3	3
35-44	Urban	Primary	Not Employed	Not Employed	More female babies	More than 6 years	25,000 PKR or less	With Spouse’s extended family	9 months	male	Simple Vaginal delivery (Normal)	Government hospital	No	No	Yes	5	5	5	5	5	5	5	5	5	5	2	1	0	2	2	3	3	2	2	0	1	1	0	0	0	0	0	0	0	0	0	3	0	3
35-44	Urban	No Formal education	Not Employed	Employed	More female babies	More than 6 years	26,000 – 50,000	With Spouse’s extended family	9 months	Female	Simple Vaginal delivery (Normal)	Government hospital	No	No	Yes	5	5	5	5	5	5	5	5	5	5	1	2	3	2	2	2	2	2	2	2	1	0	1	1	0	0	0	0	0	0	0	3	2	3
26-34	Urban	High School	Not Employed	Not Employed	More female babies	2 to 6 years	25,000 PKR or less	With Spouse’s extended family	9 months	Female	Simple Vaginal delivery (Normal)	Government hospital	No	Yes	Yes	3	5	3	3	4	4	4	4	4	4	2	1	3	2	2	1	1	2	1	2	1	0	0	0	1	0	0	0	0	0	0	3	2	3
35-44	Urban	High School	Not Employed	Employed	More male babies	More than 6 years	50,000 – 1 lac PKR	With Spouse’s extended family	9 months	male	C- section	Government hospital	No	No	Yes	5	5	5	6	5	5	6	5	6	5	1	2	2	2	2	2	3	3	1	3	1	1	0	0	0	0	0	0	0	0	0	3	3	3
35-44	Urban	High School	Not Employed	Employed	More female babies	More than 6 years	50,000 – 1 lac PKR	With Spouse’s extended family	9 months	male	Simple Vaginal delivery (Normal)	Government hospital	No	Yes	Yes	3	3	5	5	3	3	5	3	3	3	2	1	3	2	3	2	3	3	2	0	1	1	0	1	1	0	0	0	0	0	0	2	2	2
26-34	Urban	High School	Not Employed	Employed	More female babies	More than 6 years	26,000 – 50,000	With Spouse’s extended family	9 months	male	C- section	Government hospital	No	No	Yes	3	6	6	6	4	4	5	5	5	4	1	2	2	2	2	2	2	2	2	2	1	1	0	0	0	0	0	0	0	0	0	2	2	2
35-44	Urban	Middle	Not Employed	Employed	Equal number of male and female babies	More than 6 years	26,000 – 50,000	With Spouse’s extended family	9 months	male	C- section	Government hospital	No	No	Yes	5	5	5	5	5	5	5	5	5	5	2	2	2	2	2	3	2	3	2	0	1	1	0	0	0	0	0	0	0	0	0	0	0	0
35-44	Urban	Primary	Not Employed	Employed	More female babies	More than 6 years	26,000 – 50,000	With Spouse’s extended family	9 months	Female	Simple Vaginal delivery (Normal)	Government hospital	No	No	Yes	1	6	5	6	5	5	6	5	6	5	1	1	2	2	2	2	2	2	2	2	1	0	0	1	1	0	0	0	0	0	0	2	2	0
35-44	Urban	High School	Not Employed	Employed	Equal number of male and female babies	More than 6 years	50,000 – 1 lac PKR	With Spouse’s extended family	9 months	Female	Simple Vaginal delivery (Normal)	Government hospital	No	No	Yes	5	5	5	5	5	5	4	5	5	4	2	1	1	1	3	3	3	3	2	2	1	1	0	0	0	0	0	0	0	0	0	3	3	3
26-34	Urban	Primary	Not Employed	Employed	Equal number of male and female babies	More than 6 years	26,000 – 50,000	With Spouse’s extended family	9 months	Female	C- section	Government hospital	No	No	Yes	5	5	5	5	5	5	5	5	5	5	2	2	2	2	2	2	2	2	2	2	1	1	0	1	0	0	0	0	0	0	0	2	2	2
35-44	Urban	No Formal education	Not Employed	Employed	More female babies	More than 6 years	26,000 – 50,000	With Spouse’s extended family	9 months	Female	C- section	Government hospital	No	No	Yes	5	5	5	5	5	5	5	5	5	5	2	2	2	2	2	2	3	2	1	1	1	1	0	0	0	0	0	0	0	0	0	2	2	2
35-44	Urban	Primary	Not Employed	Employed	More female babies	More than 6 years	50,000 – 1 lac PKR	With Spouse’s extended family	9 months	male	C- section	Government hospital	No	No	Yes	5	5	5	5	5	5	5	5	5	5	2	1	2	2	2	1	2	2	3	1	1	1	0	0	0	0	0	0	0	0	1	2	2	2
35-44	Urban	Primary	Not Employed	Employed	More female babies	More than 6 years	50,000 – 1 lac PKR	With Spouse’s extended family	9 months	Female	C- section	Government hospital	No	No	Yes	6	6	6	6	6	6	6	6	6	6	2	3	2	3	2	3	2	3	2	0	1	1	0	0	0	0	0	0	0	0	0	1	1	1
35-44	Urban	Bachelors	Employed	Employed	More female babies	More than 6 years	50,000 – 1 lac PKR	Own house	9 months	Female	C- section	Government hospital	No	No	Yes	5	5	5	5	5	5	5	5	5	5	2	2	2	2	1	2	2	2	2	2	1	1	1	0	0	0	0	0	0	0	0	3	3	3
16-25	Urban	Bachelors	Employed	Employed	More female babies	2 to 6 years	50,000 – 1 lac PKR	Own house	9 months	Female	C- section	Government hospital	No	No	Yes	5	5	5	5	5	5	5	5	5	5	2	2	2	1	2	2	2	1	2	1	1	1	0	0	0	0	0	0	0	0	0	3	3	0
16-25	Urban	High School	Not Employed	Employed	More male babies	2 to 6 years	50,000 – 1 lac PKR	With Spouse’s extended family	9 months	male	C- section	Government hospital	Yes	No	Yes	3	5	5	5	4	4	5	4	5	4	2	1	3	2	2	2	2	2	1	0	1	1	0	1	1	0	0	0	0	0	0	2	2	0
16-25	Urban	High School	Not Employed	Employed	More male babies	2 to 6 years	50,000 – 1 lac PKR	With Spouse’s extended family	9 months	male	C- section	Government hospital	Yes	No	Yes	3	5	5	5	4	4	5	4	5	4	2	2	1	2	1	1	2	2	1	1	1	1	0	1	1	0	0	0	0	0	0	2	2	2
35-44	Urban	High School	Not Employed	Employed	Equal number of male and female babies	More than 6 years	26,000 – 50,000	With Spouse’s extended family	9 months	Female	Simple Vaginal delivery (Normal)	Government hospital	No	No	Yes	5	5	6	5	5	5	5	5	5	5	2	1	2	2	2	2	1	3	2	0	1	0	0	1	0	0	0	0	0	0	0	3	3	2
35-44	Urban	High School	Not Employed	Employed	More male babies	More than 6 years	26,000 – 50,000	With Spouse’s extended family	Less than 9 months	male	C- section	Government hospital	No	No	Yes	1	6	6	6	6	6	6	6	6	5	2	1	3	1	2	1	1	2	2	0	1	1	0	0	0	0	0	0	1	0	0	3	3	3
35-44	Urban	Primary	Not Employed	Employed	More female babies	More than 6 years	26,000 – 50,000	With Spouse’s extended family	9 months	Female	C- section	Government hospital	No	Yes	Yes	5	6	5	5	5	5	5	5	5	5	2	1	1	2	3	2	2	2	2	0	1	0	0	0	1	0	0	0	0	0	0	2	2	2
35-44	Urban	No Formal education	Not Employed	Employed	Equal number of male and female babies	More than 6 years	26,000 – 50,000	With Spouse’s extended family	Less than 9 months	male	C- section	Government hospital	No	No	Yes	5	5	5	5	5	5	5	5	5	5	0	0	3	3	2	2	2	3	2	0	1	1	0	0	0	0	0	0	0	0	0	0	0	0
26-34	Urban	High School	Not Employed	Employed	Equal number of male and female babies	More than 6 years	25,000 PKR or less	With Spouse’s extended family	9 months	Female	C- section	Government hospital	No	No	Yes	3	5	5	5	3	3	5	3	7	3	2	2	2	1	3	2	2	1	3	1	1	0	0	1	0	0	0	0	0	0	0	3	3	3
35-44	Urban	High School	Not Employed	Not Employed	More female babies	More than 6 years	26,000 – 50,000	With Spouse’s extended family	9 months	Female	Simple Vaginal delivery (Normal)	Government hospital	No	No	Yes	5	5	5	5	5	5	5	5	5	5	2	2	2	1	2	3	1	3	3	1	1	0	0	1	0	0	0	0	0	0	0	3	2	2
26-34	Urban	High School	Not Employed	Employed	Equal number of male and female babies	More than 6 years	26,000 – 50,000	With Spouse’s extended family	9 months	Female	C- section	Government hospital	No	No	Yes	5	5	5	5	5	5	5	5	5	5	1	2	2	2	1	2	2	2	1	2	1	0	0	0	0	0	0	0	0	0	0	2	0	2
16-25	Urban	Middle	Not Employed	Not Employed	Equal number of male and female babies	2 to 6 years	26,000 – 50,000	Own house	9 months	male	C- section	Government hospital	No	No	Yes	5	5	5	5	5	5	5	5	5	5	2	1	2	2	1	1	3	3	1	0	1	0	0	0	0	0	0	0	0	0	0	2	2	2
16-25	Urban	High School	Not Employed	Not Employed	More male babies	2 to 6 years	25,000 PKR or less	With Spouse’s extended family	9 months	male	C- section	Government hospital	No	No	Yes	3	3	3	5	3	3	3	3	3	3	2	1	1	2	2	1	3	2	1	0	1	1	0	1	0	0	0	0	0	0	0	1	1	1
35-44	Urban	High School	Not Employed	Employed	Equal number of male and female babies	More than 6 years	26,000 – 50,000	With Spouse’s extended family	9 months	male	C- section	Government hospital	No	No	Yes	5	5	5	5	5	5	5	5	5	5	2	1	3	2	2	1	2	2	2	0	1	0	0	0	0	0	0	0	0	0	0	2	2	2
16-25	Urban	High School	Not Employed	Employed	Equal number of male and female babies	More than 6 years	26,000 – 50,000	With Spouse’s extended family	9 months	Female	C- section	Government hospital	No	No	Yes	5	5	5	5	3	5	5	5	5	5	0	0	1	1	3	0	2	2	2	2	1	1	1	0	0	0	0	0	0	0	0	2	2	2
26-34	Urban	High School	Not Employed	Employed	More female babies	More than 6 years	26,000 – 50,000	Own house	9 months	male	C- section	Government hospital	No	No	Yes	5	5	5	5	5	5	5	5	5	5	2	1	2	2	2	2	2	3	1	0	1	0	1	0	0	0	0	0	0	0	0	0	2	2
16-25	Urban	High School	Not Employed	Employed	More female babies	2 to 6 years	25,000 PKR or less	With Spouse’s extended family	9 months	Female	Simple Vaginal delivery (Normal)	Government hospital	Yes	No	Yes	3	5	5	5	5	5	5	5	5	5	2	1	2	1	1	2	1	1	1	0	1	1	0	0	0	0	0	0	0	0	0	2	2	2
26-34	Urban	High School	Not Employed	Employed	Equal number of male and female babies	More than 6 years	26,000 – 50,000	With Spouse’s extended family	9 months	Female	C- section	Government hospital	No	No	Yes	6	6	5	5	5	5	5	5	5	5	2	1	2	2	1	2	3	2	1	0	1	0	0	1	0	0	0	0	0	0	0	2	2	2
35-44	Urban	No Formal education	Not Employed	Employed	More female babies	More than 6 years	26,000 – 50,000	With Spouse’s extended family	9 months	Female	C- section	Government hospital	No	No	Yes	3	5	5	5	3	3	5	3	5	3	2	2	2	2	1	3	3	3	3	0	1	1	0	0	0	0	0	0	0	0	0	2	1	1
16-25	Rural	High School	Not Employed	Employed	More female babies	2 to 6 years	26,000 – 50,000	With Spouse’s extended family	9 months	male	C- section	Government hospital	No	No	Yes	5	5	5	3	5	4	6	4	4	4	1	2	1	1	2	0	0	3	3	1	1	0	0	0	1	0	0	0	0	0	0	1	1	1
16-25	Urban	High School	Not Employed	Employed	More male babies	2 to 6 years	26,000 – 50,000	With Spouse’s extended family	9 months	male	C- section	Government hospital	No	No	Yes	6	6	5	6	5	5	5	6	6	3	0	0	2	1	2	1	3	1	2	0	1	1	0	0	0	0	0	0	0	0	0	3	3	3
35-44	Urban	High School	Not Employed	Employed	More male babies	More than 6 years	26,000 – 50,000	With Spouse’s extended family	9 months	male	C- section	Government hospital	No	No	Yes	5	5	5	5	5	5	5	5	5	5	0	1	2	2	1	3	1	1	1	0	1	1	0	0	0	0	0	0	0	0	0	1	1	2
26-34	Urban	High School	Not Employed	Employed	More female babies	2 to 6 years	26,000 – 50,000	With Spouse’s extended family	9 months	Female	C- section	Government hospital	No	No	Yes	6	6	6	6	2	2	6	3	5	3	1	2	1	1	2	1	1	1	2	0	1	0	0	0	0	0	0	0	0	0	0	2	3	3
26-34	Urban	High School	Not Employed	Employed	More male babies	2 to 6 years	25,000 PKR or less	With Spouse’s extended family	9 months	Female	Simple Vaginal delivery (Normal)	Government hospital	No	No	Yes	4	5	5	5	5	5	5	5	6	6	2	1	1	1	1	2	2	2	2	0	1	1	0	0	0	0	0	0	0	0	0	2	1	1
16-25	Urban	Bachelors	Not Employed	Employed	More male babies	2 to 6 years	26,000 – 50,000	With Spouse’s extended family	9 months	male	C- section	Government hospital	Yes	No	Yes	4	5	5	5	5	5	3	4	5	4	1	1	3	2	2	2	1	2	2	0	1	0	0	1	0	0	0	0	0	0	0	2	0	2
26-34	Urban	Primary	Not Employed	Employed	Equal number of male and female babies	More than 6 years	25,000 PKR or less	With Spouse’s extended family	9 months	male	C- section	Government hospital	No	No	Yes	5	5	5	5	5	5	5	5	5	5	2	1	1	2	2	1	2	3	3	3	1	1	1	0	0	0	0	0	0	0	0	2	2	2
35-44	Urban	No Formal education	Not Employed	Employed	More female babies	More than 6 years	26,000 – 50,000	Own house	9 months	Female	C- section	Government hospital	No	No	Yes	3	3	5	3	5	5	5	5	5	3	2	1	3	1	2	2	1	3	3	2	1	0	0	1	0	0	0	0	0	0	0	0	0	0
26-34	Urban	No Formal education	Not Employed	Employed	More female babies	2 to 6 years	26,000 – 50,000	Own house	9 months	Female	C- section	Government hospital	No	No	Yes	3	5	5	3	5	6	6	6	6	4	1	2	2	2	3	2	3	1	2	0	1	1	0	0	0	0	0	0	0	0	0	1	1	1
26-34	Urban	Primary	Not Employed	Employed	More male babies	More than 6 years	25,000 PKR or less	Own house	9 months	male	C- section	Government hospital	No	No	Yes	3	3	5	3	5	5	5	5	3	5	1	1	2	1	2	1	1	2	2	1	1	0	1	1	0	0	0	0	0	0	0	2	2	2
26-34	Urban	High School	Not Employed	Employed	More female babies	More than 6 years	25,000 PKR or less	With Spouse’s extended family	9 months	male	C- section	Government hospital	No	No	Yes	3	3	3	3	4	4	5	4	3	4	2	1	2	2	1	2	2	3	1	0	1	0	0	0	0	0	0	0	0	0	1	0	0	0
35-44	Urban	High School	Not Employed	Employed	Equal number of male and female babies	2 to 6 years	26,000 – 50,000	With Spouse’s extended family	9 months	Female	Simple Vaginal delivery (Normal)	Government hospital	No	No	Yes	5	5	5	5	5	5	3	3	5	3	1	2	3	1	2	0	3	2	1	0	1	0	0	0	0	0	0	0	0	0	0	2	0	0
35-44	Urban	No Formal education	Not Employed	Employed	More male babies	More than 6 years	25,000 PKR or less	Own house	9 months	male	C- section	Government hospital	No	No	Yes	2	2	5	2	5	4	5	4	4	4	2	1	2	2	2	2	2	1	2	0	1	1	0	0	0	0	0	0	0	0	0	2	1	2
26-34	Urban	Middle	Not Employed	Employed	More female babies	2 to 6 years	26,000 – 50,000	With Spouse’s extended family	9 months	male	C- section	Government hospital	No	No	Yes	6	6	5	6	5	5	5	6	6	5	2	1	2	2	3	1	3	2	2	0	1	1	0	1	0	0	0	0	0	0	0	0	0	1
16-25	Urban	Middle	Not Employed	Not Employed	More male babies	2 to 6 years	25,000 PKR or less	Own house	9 months	male	C- section	Government hospital	Yes	No	Yes	5	5	4	5	5	5	6	5	5	5	2	2	2	1	2	1	1	2	1	0	1	1	1	1	0	0	0	0	0	0	0	2	0	0
26-34	Urban	Primary	Not Employed	Not Employed	More female babies	More than 6 years	25,000 PKR or less	Own house	9 months	male	C- section	Government hospital	No	No	Yes	4	4	5	6	4	5	5	5	5	5	2	1	1	1	2	0	1	1	3	0	1	1	0	0	0	0	0	0	0	0	1	0	0	0
26-34	Urban	Middle	Not Employed	Not Employed	More female babies	More than 6 years	25,000 PKR or less	With Spouse’s extended family	9 months	male	C- section	Government hospital	No	No	Yes	5	5	5	5	5	5	5	5	5	5	0	1	3	3	2	2	2	2	2	0	1	0	0	0	1	0	0	0	0	0	0	2	0	2
35-44	Urban	High School	Not Employed	Employed	More female babies	2 to 6 years	26,000 – 50,000	Own house	9 months	male	C- section	Government hospital	No	No	Yes	5	6	5	6	5	5	5	5	6	5	2	1	1	1	1	1	2	2	1	0	1	0	0	1	0	0	0	0	0	0	0	0	0	0
26-34	Urban	Bachelors	Employed	Not Employed	More female babies	More than 6 years	25,000 PKR or less	With Spouse’s extended family	Less than 9 months	Female	C- section	Private hospital	No	Yes	Yes	5	6	6	6	5	5	6	5	6	5	0	1	1	2	2	1	2	1	2	1	1	1	0	0	0	0	0	0	0	0	0	1	1	1
35-44	Urban	Primary	Not Employed	Employed	More male babies	More than 6 years	26,000 – 50,000	With Spouse’s extended family	9 months	male	C- section	Private hospital	No	No	Yes	5	5	3	5	5	5	5	5	5	5	2	1	1	1	2	1	2	2	2	0	1	1	0	0	0	0	0	0	0	0	0	2	0	0
35-44	Urban	Middle	Not Employed	Employed	More male babies	More than 6 years	26,000 – 50,000	With Spouse’s extended family	9 months	male	C- section	Government hospital	No	No	Yes	5	2	5	5	5	5	5	5	5	5	0	2	1	2	2	1	1	2	1	2	1	1	0	1	0	0	0	0	0	0	0	0	0	0
16-25	Urban	Bachelors	Not Employed	Employed	More female babies	2 to 6 years	26,000 – 50,000	With Spouse’s extended family	9 months	Female	C- section	Private hospital	Yes	No	Yes	1	6	6	6	6	6	6	5	6	5	0	0	3	2	2	2	2	2	2	2	1	1	1	1	0	0	0	0	0	0	0	3	2	3
26-34	Urban	High School	Not Employed	Employed	Equal number of male and female babies	2 to 6 years	25,000 PKR or less	With Spouse’s extended family	9 months	Female	C- section	Private hospital	No	No	Yes	5	6	6	6	6	6	6	6	6	6	2	1	1	2	2	0	2	0	0	2	1	0	0	1	1	0	0	0	0	0	0	2	1	1
35-44	Urban	Primary	Not Employed	Employed	More female babies	2 to 6 years	25,000 PKR or less	With Spouse’s extended family	9 months	Female	C- section	Private hospital	No	No	Yes	5	6	6	6	6	6	6	6	6	6	2	2	1	0	2	1	2	2	1	1	1	1	0	0	0	0	0	0	0	0	0	1	1	1
26-34	Urban	High School	Not Employed	Employed	More male babies	More than 6 years	26,000 – 50,000	Own house	9 months	male	C- section	Private hospital	No	No	Yes	5	6	5	5	5	5	5	5	5	5	0	2	2	2	2	0	2	2	2	2	1	0	0	0	0	0	0	0	0	0	1	3	3	3
35-44	Urban	Bachelors	Not Employed	Not Employed	More female babies	More than 6 years	50,000 – 1 lac PKR	Own house	9 months	Female	C- section	Private hospital	No	No	Yes	5	5	6	5	6	5	5	5	5	5	1	1	2	0	2	1	3	2	1	1	1	1	1	0	0	0	0	0	0	0	0	1	1	1
26-34	Urban	High School	Not Employed	Employed	More female babies	More than 6 years	26,000 – 50,000	Own house	9 months	Female	C- section	Private hospital	No	No	Yes	5	5	6	5	6	6	6	6	6	6	1	2	2	2	2	1	1	2	1	2	1	1	0	1	0	0	0	0	0	0	0	2	2	2
35-44	Urban	No Formal education	Not Employed	Employed	More female babies	More than 6 years	26,000 – 50,000	With Spouse’s extended family	9 months	Female	C- section	Private hospital	No	No	Yes	1	5	6	6	5	5	6	6	5	6	3	2	1	2	3	1	1	2	1	2	1	1	0	1	0	0	0	1	0	0	0	0	0	0
26-34	Urban	High School	Not Employed	Employed	More female babies	More than 6 years	26,000 – 50,000	With Spouse’s extended family	9 months	Female	C- section	Private hospital	No	No	Yes	5	5	7	5	5	5	6	3	5	5	2	1	2	1	2	2	2	1	2	1	1	1	0	0	0	0	0	1	0	0	0	0	2	3
26-34	Urban	Primary	Not Employed	Employed	Equal number of male and female babies	More than 6 years	26,000 – 50,000	With Spouse’s extended family	9 months	male	C- section	Private hospital	No	No	Yes	5	5	6	5	5	3	6	5	5	3	2	1	2	3	1	1	2	2	1	1	1	1	0	0	0	0	0	0	0	0	0	0	2	0
16-25	Urban	Middle	Not Employed	Employed	More male babies	2 to 6 years	25,000 PKR or less	With Spouse’s extended family	9 months	male	C- section	Private hospital	Yes	No	Yes	7	5	6	6	6	6	6	6	5	5	1	3	1	1	1	1	2	2	2	0	1	0	0	1	1	0	0	0	0	0	1	2	1	2
26-34	Urban	Primary	Not Employed	Employed	Equal number of male and female babies	More than 6 years	50,000 – 1 lac PKR	With Spouse’s extended family	9 months	Female	C- section	Government hospital	No	Yes	Yes	3	6	5	5	5	5	6	6	6	5	2	1	1	2	2	1	2	2	1	2	1	0	0	1	0	1	0	0	0	0	0	0	0	0
16-25	Urban	Bachelors	Not Employed	Employed	More female babies	2 to 6 years	26,000 – 50,000	Own house	9 months	male	C- section	Private hospital	No	No	Yes	5	5	5	5	6	6	5	6	6	5	2	1	3	2	2	1	2	1	3	1	1	1	1	0	0	0	0	0	0	0	0	0	0	0
26-34	Urban	Masters or higher	Employed	Employed	More female babies	2 to 6 years	26,000 – 50,000	Own house	9 months	Female	C- section	Private hospital	No	No	Yes	6	6	5	5	3	3	5	3	5	3	2	1	1	1	2	1	2	1	2	1	1	0	0	0	0	1	0	0	0	0	0	0	2	0
26-34	Urban	No Formal education	Not Employed	Employed	Equal number of male and female babies	More than 6 years	26,000 – 50,000	With Spouse’s extended family	9 months	male	C- section	Private hospital	No	No	Yes	3	5	5	5	5	4	5	4	5	4	2	1	1	2	1	1	2	1	1	0	1	1	0	0	0	0	0	0	0	0	0	3	2	3
35-44	Urban	Primary	Not Employed	Employed	Equal number of male and female babies	2 to 6 years	26,000 – 50,000	With Spouse’s extended family	9 months	Female	Simple Vaginal delivery (Normal)	Government hospital	No	No	Yes	5	5	5	5	4	4	3	4	4	4	2	1	2	2	2	1	1	2	2	1	1	1	0	0	0	0	0	0	0	0	0	2	1	0
26-34	Urban	Bachelors	Not Employed	Employed	More male babies	More than 6 years	26,000 – 50,000	With Spouse’s extended family	9 months	Female	C- section	Government hospital	No	Yes	Yes	5	5	5	5	5	5	5	5	5	7	1	2	1	1	2	2	1	1	1	1	1	1	1	0	0	0	0	0	0	0	0	2	3	3
16-25	Urban	No Formal education	Not Employed	Employed	More male babies	More than 6 years	26,000 – 50,000	Own house	9 months	male	C- section	Private hospital	Yes	No	Yes	5	6	6	5	6	5	6	6	5	5	1	2	2	2	2	1	0	1	2	2	1	1	0	0	0	0	0	0	0	0	0	0	0	0
26-34	Urban	No Formal education	Not Employed	Not Employed	Equal number of male and female babies	More than 6 years	26,000 – 50,000	With Spouse’s extended family	9 months	Female	C- section	Private hospital	No	No	Yes	5	5	5	5	5	5	5	5	5	5	2	1	3	1	0	2	2	1	2	0	1	0	0	0	1	0	0	0	0	0	0	2	2	2
16-25	Urban	Masters or higher	Employed	Employed	More female babies	2 to 6 years	26,000 – 50,000	Own house	Less than 9 months	Female	C- section	Private hospital	Yes	Yes	Yes	6	6	5	6	5	5	5	5	6	5	2	1	2	2	2	2	1	2	2	2	1	1	0	0	0	0	0	0	0	0	0	2	1	2
16-25	Urban	High School	Not Employed	Employed	More female babies	More than 6 years	26,000 – 50,000	With Spouse’s extended family	9 months	Female	C- section	Private hospital	No	No	Yes	5	5	6	5	5	6	5	3	5	3	2	1	2	2	1	1	2	1	3	1	1	1	0	0	0	0	0	1	0	0	0	0	2	0
16-25	Urban	Bachelors	Employed	Employed	More male babies	Less than one year	26,000 – 50,000	Own house	Less than 9 months	male	C- section	Private hospital	Yes	No	Yes	3	4	5	5	4	5	5	4	5	4	2	1	1	2	3	0	2	2	1	0	1	0	0	1	0	0	0	0	0	0	1	0	0	3
26-34	Urban	Primary	Employed	Not Employed	More female babies	More than 6 years	50,000 – 1 lac PKR	Own house	Less than 9 months	Female	C- section	Private hospital	No	No	Yes	5	5	6	5	5	3	5	3	5	3	1	2	1	2	1	3	1	2	2	0	1	1	0	0	1	0	0	1	0	0	0	1	3	2
35-44	Urban	Bachelors	Not Employed	Employed	Equal number of male and female babies	More than 6 years	26,000 – 50,000	Own house	9 months	male	C- section	Private hospital	No	No	Yes	2	5	6	5	5	5	5	5	5	5	2	1	0	3	0	2	3	3	2	2	1	1	1	1	1	0	0	1	0	0	0	0	0	0
35-44	Urban	High School	Not Employed	Employed	More female babies	More than 6 years	26,000 – 50,000	With Spouse’s extended family	9 months	Female	C- section	Private hospital	No	No	Yes	5	5	5	5	5	5	3	5	5	5	2	1	3	3	1	1	3	2	3	3	1	1	1	0	0	0	0	0	0	0	0	3	3	2
26-34	Urban	High School	Not Employed	Employed	Equal number of male and female babies	More than 6 years	26,000 – 50,000	With Spouse’s extended family	9 months	male	C- section	Private hospital	No	No	Yes	5	5	5	5	5	3	5	5	5	5	2	1	3	3	1	1	2	2	1	0	1	1	0	0	0	0	0	1	1	0	0	2	3	2
35-44	Urban	High School	Not Employed	Employed	More female babies	More than 6 years	50,000 – 1 lac PKR	Own house	Less than 9 months	Female	C- section	Private hospital	No	Yes	Yes	5	5	6	7	5	5	5	5	5	5	2	1	3	2	2	3	0	0	3	1	1	0	0	1	1	0	0	1	0	0	0	0	0	0
26-34	Urban	Primary	Not Employed	Employed	More female babies	More than 6 years	50,000 – 1 lac PKR	Own house	Less than 9 months	male	C- section	Private hospital	No	No	Yes	5	5	5	5	5	3	5	3	5	3	2	1	3	2	2	2	1	1	1	2	1	1	0	0	0	0	0	1	1	0	0	1	2	3
26-34	Urban	High School	Not Employed	Employed	More female babies	More than 6 years	26,000 – 50,000	Own house	9 months	Female	C- section	Private hospital	No	No	Yes	1	3	4	3	3	3	3	3	3	3	1	2	2	2	2	1	2	1	2	1	1	0	0	0	0	0	0	0	0	0	1	0	0	0
26-34	Urban	High School	Not Employed	Employed	More female babies	More than 6 years	26,000 – 50,000	With Spouse’s extended family	9 months	Female	C- section	Private hospital	No	No	Yes	6	6	6	6	5	5	5	5	6	5	3	3	3	1	2	1	2	2	2	2	1	0	0	0	0	0	0	0	0	0	0	1	1	0
26-34	Urban	High School	Not Employed	Employed	Equal number of male and female babies	2 to 6 years	26,000 – 50,000	With Spouse’s extended family	9 months	Female	Simple Vaginal delivery (Normal)	Private hospital	No	No	Yes	1	1	5	4	3	3	3	3	3	3	2	1	1	3	2	1	1	2	1	1	1	0	0	1	0	0	0	0	0	0	0	1	2	0
26-34	Urban	High School	Not Employed	Employed	More female babies	More than 6 years	50,000 – 1 lac PKR	With Spouse’s extended family	9 months	male	C- section	Private hospital	No	No	Yes	6	5	4	4	4	4	6	4	5	4	1	2	2	1	2	2	2	2	2	1	1	1	0	0	0	0	0	0	0	0	0	3	0	0
26-34	Urban	Bachelors	Employed	Employed	More female babies	More than 6 years	50,000 – 1 lac PKR	With Spouse’s extended family	9 months	Female	C- section	Private hospital	No	No	Yes	5	5	5	5	3	3	5	5	5	5	2	1	1	2	1	1	1	1	2	0	1	0	1	0	0	1	0	0	0	0	0	0	0	0
35-44	Urban	High School	Not Employed	Not Employed	More female babies	More than 6 years	26,000 – 50,000	Own house	9 months	male	C- section	Private hospital	No	Yes	Yes	2	3	5	6	6	5	5	5	4	5	3	3	2	2	2	1	3	1	2	1	1	0	0	0	1	0	0	0	0	0	0	2	2	1
16-25	Urban	Bachelors	Not Employed	Employed	More male babies	2 to 6 years	26,000 – 50,000	Own house	9 months	male	C- section	Private hospital	Yes	No	Yes	5	5	5	6	5	6	5	5	5	5	2	0	1	2	3	0	0	2	3	2	1	0	1	1	0	0	0	0	0	0	1	0	0	0
45+	Urban	No Formal education	Not Employed	Employed	Equal number of male and female babies	2 to 6 years	26,000 – 50,000	With Spouse’s extended family	9 months	Female	C- section	Private hospital	No	No	Yes	5	5	5	5	5	5	5	2	5	1	0	1	1	1	3	3	2	1	2	0	1	0	0	0	0	0	0	0	0	0	0	0	0	3
35-44	Urban	High School	Not Employed	Employed	More female babies	More than 6 years	25,000 PKR or less	With Spouse’s extended family	9 months	Female	C- section	Private hospital	No	Yes	Yes	2	2	5	2	5	5	5	5	3	5	1	3	2	2	2	3	3	2	3	0	1	0	0	1	0	0	0	0	0	0	0	3	2	2
35-44	Urban	High School	Not Employed	Employed	More male babies	More than 6 years	50,000 – 1 lac PKR	Own house	9 months	Female	C- section	Private hospital	No	No	Yes	5	5	2	5	4	4	5	4	5	4	2	1	3	3	3	2	1	2	0	0	1	0	0	0	0	0	0	0	0	0	1	3	3	3
16-25	Urban	Masters or higher	Not Employed	Employed	More female babies	More than 6 years	50,000 – 1 lac PKR	With Spouse’s extended family	Less than 9 months	male	C- section	Private hospital	No	Yes	Yes	5	5	5	5	4	4	5	4	5	4	2	1	2	2	2	3	3	2	2	0	1	1	0	0	0	0	0	0	0	0	0	2	2	2
35-44	Rural	No Formal education	Not Employed	Employed	Equal number of male and female babies	More than 6 years	50,000 – 1 lac PKR	With Spouse’s extended family	9 months	Female	C- section	Private hospital	No	Yes	Yes	5	6	6	6	5	5	5	5	5	5	1	0	2	1	2	3	2	1	3	0	1	1	0	0	0	0	0	0	0	0	0	2	2	2
35-44	Urban	High School	Not Employed	Employed	More female babies	More than 6 years	26,000 – 50,000	With Spouse’s extended family	9 months	Female	C- section	Private hospital	No	No	Yes	5	5	5	5	5	4	4	4	5	4	1	1	3	3	1	2	2	1	2	0	1	0	0	0	0	0	0	0	0	0	0	3	0	0
16-25	Rural	Bachelors	Not Employed	Employed	Equal number of male and female babies	2 to 6 years	25,000 PKR or less	With Spouse’s extended family	Less than 9 months	Female	C- section	Private hospital	Yes	No	Yes	3	3	5	5	5	5	5	5	5	5	2	1	1	1	1	2	1	1	2	0	1	0	0	0	0	0	0	0	1	0	0	3	1	2
35-44	Rural	High School	Not Employed	Employed	More female babies	More than 6 years	26,000 – 50,000	With Spouse’s extended family	9 months	Female	C- section	Private hospital	No	Yes	Yes	5	5	5	3	5	5	5	5	1	5	2	1	2	1	2	2	1	3	2	3	1	0	0	0	0	0	0	0	0	0	0	0	0	0
26-34	Urban	Bachelors	Employed	Employed	More female babies	2 to 6 years	26,000 – 50,000	With Spouse’s extended family	9 months	Female	Simple Vaginal delivery (Normal)	Private hospital	No	No	Yes	2	5	5	3	3	3	5	3	3	5	3	3	2	2	2	2	2	2	1	3	1	1	0	0	0	0	0	0	0	0	0	3	0	0
35-44	Rural	Middle	Not Employed	Employed	More female babies	More than 6 years	25,000 PKR or less	With Spouse’s extended family	9 months	Female	Simple Vaginal delivery (Normal)	Private hospital	No	No	Yes	5	5	5	5	5	5	5	5	5	5	1	2	2	2	0	3	2	2	2	0	1	0	0	1	0	0	0	0	1	0	0	3	0	0
35-44	Urban	High School	Not Employed	Employed	More female babies	2 to 6 years	25,000 PKR or less	With Spouse’s extended family	9 months	Female	C- section	Private hospital	No	Yes	Yes	5	5	5	5	5	5	5	5	5	5	1	1	2	1	2	2	1	1	1	0	1	0	0	0	0	0	0	0	0	0	0	0	0	0
35-44	Urban	Masters or higher	Employed	Employed	More male babies	More than 6 years	50,000 – 1 lac PKR	Own house	9 months	male	Simple Vaginal delivery (Normal)	Private hospital	No	No	Yes	5	5	5	5	5	3	5	5	3	3	1	2	2	2	1	2	0	0	3	2	1	0	0	0	1	0	0	1	0	0	0	0	0	0
26-34	Urban	High School	Not Employed	Employed	Equal number of male and female babies	More than 6 years	26,000 – 50,000	Own house	9 months	Female	C- section	Private hospital	No	Yes	Yes	5	6	6	5	5	5	5	5	5	5	2	1	1	1	2	2	2	1	1	0	1	0	0	0	0	0	0	0	0	0	1	0	0	0
16-25	Urban	Middle	Not Employed	Employed	More male babies	More than 6 years	More than 1 lac PKR	With Spouse’s extended family	9 months	Female	C- section	Private hospital	No	No	Yes	3	7	5	7	3	3	5	5	5	5	2	1	2	2	1	2	3	1	1	0	1	1	0	0	0	0	0	0	0	0	0	3	0	2
45+	Urban	Bachelors	Not Employed	Employed	Equal number of male and female babies	More than 6 years	50,000 – 1 lac PKR	Own house	9 months	Female	C- section	Private hospital	No	No	Yes	5	5	5	5	5	4	5	6	5	6	1	3	3	3	2	3	3	2	2	1	1	1	1	0	0	0	0	1	0	0	0	0	0	0
26-34	Urban	Masters or higher	Not Employed	Employed	More female babies	More than 6 years	26,000 – 50,000	With Spouse’s extended family	Less than 9 months	Female	C- section	Private hospital	No	No	Yes	2	5	5	3	3	3	5	3	3	3	1	2	2	1	2	0	1	3	2	0	1	0	0	0	0	0	0	0	0	0	0	0	0	0
26-34	Urban	High School	Employed	Employed	More male babies	More than 6 years	50,000 – 1 lac PKR	Own house	9 months	male	C- section	Private hospital	No	No	Yes	3	3	3	3	3	3	3	1	3	2	2	1	3	1	1	3	2	2	1	2	1	0	0	0	0	1	0	0	0	0	0	1	1	0
16-25	Urban	Bachelors	Employed	Employed	Equal number of male and female babies	More than 6 years	50,000 – 1 lac PKR	Own house	9 months	male	C- section	Private hospital	No	No	Yes	3	3	3	5	5	5	5	5	5	5	0	0	3	3	2	2	1	2	3	0	1	1	0	0	1	1	0	0	0	0	0	0	0	0
35-44	Rural	High School	Not Employed	Employed	More female babies	More than 6 years	26,000 – 50,000	With Spouse’s extended family	9 months	Female	C- section	Private hospital	No	No	Yes	5	5	5	6	4	5	4	6	5	5	2	1	2	0	1	3	3	2	2	0	1	1	0	0	0	0	0	0	0	0	0	2	0	0
26-34	Urban	High School	Employed	Employed	Equal number of male and female babies	2 to 6 years	26,000 – 50,000	With Spouse’s extended family	9 months	male	C- section	Private hospital	No	Yes	Yes	5	6	6	5	3	3	5	5	5	5	2	1	1	2	1	1	1	1	1	1	1	1	0	0	0	0	0	0	0	0	0	2	2	1
16-25	Urban	No Formal education	Not Employed	Employed	More female babies	More than 6 years	25,000 PKR or less	With Spouse’s extended family	9 months	Female	C- section	Private hospital	Yes	No	Yes	5	5	5	5	3	3	3	3	3	3	1	2	2	2	2	1	2	2	1	3	1	0	0	0	0	0	0	0	0	0	1	0	0	0
45+	Rural	Primary	Not Employed	Not Employed	More female babies	More than 6 years	25,000 PKR or less	With Spouse’s extended family	9 months	Female	C- section	Private hospital	No	Yes	Yes	2	5	3	3	3	3	5	3	3	3	1	2	2	1	2	2	2	2	2	0	1	0	0	0	1	0	0	0	0	0	0	2	0	0
35-44	Urban	High School	Not Employed	Employed	Equal number of male and female babies	2 to 6 years	26,000 – 50,000	With Spouse’s extended family	Less than 9 months	Female	C- section	Private hospital	No	No	Yes	5	5	5	5	5	5	5	5	5	5	1	2	2	2	1	2	2	1	2	1	1	0	0	0	0	0	0	1	0	0	0	3	3	2
35-44	Urban	High School	Not Employed	Employed	Equal number of male and female babies	2 to 6 years	26,000 – 50,000	With Spouse’s extended family	9 months	Female	C- section	Private hospital	No	Yes	Yes	4	5	6	5	5	4	5	5	5	5	1	2	2	2	2	2	0	3	3	0	1	1	0	0	0	0	0	0	0	0	1	2	0	2
35-44	Urban	High School	Not Employed	Employed	Equal number of male and female babies	More than 6 years	26,000 – 50,000	With Spouse’s extended family	9 months	Female	C- section	Private hospital	No	Yes	Yes	5	3	3	5	3	3	6	4	5	4	1	1	2	1	1	2	1	2	2	2	1	0	0	0	0	0	0	0	0	0	0	0	3	2
26-34	Urban	Bachelors	Not Employed	Employed	More male babies	More than 6 years	26,000 – 50,000	With Spouse’s extended family	9 months	male	C- section	Government hospital	Yes	No	Yes	5	3	6	6	4	5	5	4	5	5	2	1	2	2	1	1	3	2	2	1	1	1	0	0	0	0	0	0	0	0	0	0	0	0
26-34	Urban	Masters or higher	Not Employed	Employed	More male babies	More than 6 years	26,000 – 50,000	With Spouse’s extended family	Less than 9 months	male	C- section	Private hospital	No	No	Yes	5	5	5	6	5	5	5	3	5	3	1	2	2	2	2	0	3	3	3	3	1	0	0	0	0	0	0	1	0	0	0	0	0	0
16-25	Rural	Middle	Not Employed	Employed	Equal number of male and female babies	More than 6 years	26,000 – 50,000	With Spouse’s extended family	Less than 9 months	Female	C- section	Private hospital	No	Yes	Yes	2	3	3	5	4	4	5	4	5	4	1	1	1	1	1	2	2	2	1	2	1	0	0	1	0	0	0	1	0	0	0	0	0	0
35-44	Urban	High School	Not Employed	Employed	More female babies	More than 6 years	26,000 – 50,000	With Spouse’s extended family	9 months	Female	C- section	Private hospital	No	Yes	Yes	3	5	5	5	5	5	5	5	5	5	1	2	2	0	1	2	2	1	1	1	1	0	0	1	0	0	0	0	0	0	0	2	1	1
16-25	Urban	No Formal education	Not Employed	Not Employed	Equal number of male and female babies	2 to 6 years	25,000 PKR or less	With Spouse’s extended family	Less than 9 months	Female	C- section	Private hospital	No	Yes	Yes	1	2	6	3	5	5	5	5	3	3	3	1	3	2	2	3	3	2	3	0	1	0	0	1	0	0	0	0	0	0	0	0	0	0
35-44	Urban	Middle	Not Employed	Employed	More female babies	More than 6 years	26,000 – 50,000	Own house	9 months	Female	C- section	Private hospital	No	No	Yes	5	5	6	5	4	3	5	3	5	3	1	2	1	1	3	2	2	2	2	1	1	1	0	0	0	0	0	0	0	0	0	0	0	3
26-34	Urban	Primary	Not Employed	Employed	More female babies	More than 6 years	25,000 PKR or less	With Spouse’s extended family	9 months	Female	C- section	Private hospital	No	No	Yes	5	5	5	5	4	4	5	4	5	2	2	3	1	0	1	1	1	2	1	1	1	0	0	1	0	0	0	0	0	0	0	0	0	0
26-34	Urban	High School	Not Employed	Employed	Equal number of male and female babies	More than 6 years	26,000 – 50,000	With Spouse’s extended family	9 months	Female	C- section	Private hospital	No	No	Yes	3	4	5	5	5	5	5	5	5	5	2	1	1	2	0	3	1	0	3	0	1	0	0	0	0	0	0	0	0	0	1	0	0	0
16-25	Urban	Bachelors	Not Employed	Employed	More male babies	2 to 6 years	26,000 – 50,000	With Spouse’s extended family	9 months	male	C- section	Private hospital	Yes	No	Yes	6	6	5	6	5	5	6	5	5	5	2	0	2	2	2	1	2	1	3	1	1	1	0	1	0	1	0	0	0	0	0	2	1	1
35-44	Urban	High School	Not Employed	Employed	More female babies	More than 6 years	26,000 – 50,000	With Spouse’s extended family	Less than 9 months	Female	C- section	Private hospital	No	No	Yes	4	4	3	4	5	5	5	5	3	5	0	1	0	3	3	3	3	3	3	1	1	0	1	0	0	0	0	0	0	0	0	3	3	3
35-44	Urban	High School	Not Employed	Employed	Equal number of male and female babies	More than 6 years	26,000 – 50,000	With Spouse’s extended family	Less than 9 months	Female	C- section	Private hospital	No	No	Yes	7	7	6	5	5	5	5	4	5	4	2	1	1	2	2	1	1	2	2	1	1	1	0	0	0	0	0	0	0	0	0	0	2	2
26-34	Urban	High School	Not Employed	Not Employed	More female babies	2 to 6 years	50,000 – 1 lac PKR	Own house	9 months	Female	C- section	Private hospital	No	No	Yes	5	5	5	5	5	5	5	5	5	5	1	1	1	1	2	3	2	1	0	0	1	0	0	1	0	0	0	0	0	0	0	1	1	1
35-44	Urban	High School	Not Employed	Employed	More female babies	2 to 6 years	26,000 – 50,000	With Spouse’s extended family	9 months	male	C- section	Private hospital	No	No	Yes	5	5	5	5	4	5	6	4	4	5	1	0	1	1	2	2	3	2	2	0	1	0	0	1	0	0	0	0	0	0	0	3	3	3
26-34	Urban	No Formal education	Not Employed	Employed	Equal number of male and female babies	More than 6 years	26,000 – 50,000	With Spouse’s extended family	Less than 9 months	male	C- section	Government hospital	No	No	Yes	1	4	6	6	6	6	6	6	6	4	1	2	2	2	1	1	1	2	1	1	1	0	0	1	0	0	0	0	0	0	0	3	0	0
35-44	Rural	Primary	Not Employed	Employed	More female babies	More than 6 years	26,000 – 50,000	With Spouse’s extended family	9 months	Female	Simple Vaginal delivery (Normal)	Private hospital	No	Yes	Yes	4	5	5	5	5	5	5	5	5	5	1	2	1	1	3	2	1	3	3	1	1	1	0	0	0	0	0	0	0	0	1	3	0	2
16-25	Urban	No Formal education	Not Employed	Employed	More female babies	More than 6 years	26,000 – 50,000	With Spouse’s extended family	9 months	Female	C- section	Private hospital	No	No	Yes	5	5	5	5	5	5	5	5	5	5	3	3	1	1	3	0	2	1	2	1	1	0	0	0	1	0	0	0	0	0	0	2	2	2
26-34	Urban	Masters or higher	Not Employed	Employed	More female babies	More than 6 years	25,000 PKR or less	With Spouse’s extended family	9 months	Female	C- section	Government hospital	No	No	Yes	3	6	6	6	6	5	5	5	5	5	0	1	1	2	2	2	3	3	3	3	1	1	0	0	0	0	0	0	0	0	0	3	0	3
35-44	Urban	No Formal education	Not Employed	Not Employed	More female babies	More than 6 years	25,000 PKR or less	With Spouse’s extended family	Less than 9 months	Female	C- section	Government hospital	No	No	Yes	3	2	3	3	3	3	5	3	3	3	2	1	1	2	2	2	1	1	3	3	1	0	0	0	0	0	0	0	0	0	0	3	3	0
35-44	Urban	Primary	Not Employed	Employed	More male babies	More than 6 years	25,000 PKR or less	Own house	9 months	Female	C- section	Private hospital	No	No	Yes	2	2	5	3	3	3	5	5	4	4	1	2	2	3	3	2	2	2	2	2	1	1	0	0	0	0	0	0	0	0	0	0	0	0
16-25	Urban	Primary	Not Employed	Employed	Equal number of male and female babies	2 to 6 years	25,000 PKR or less	Own house	9 months	Female	C- section	Government hospital	No	Yes	Yes	5	5	5	5	4	5	6	5	5	5	2	1	1	1	2	1	2	1	2	3	1	1	0	0	0	0	0	0	0	0	1	2	0	0
26-34	Urban	High School	Not Employed	Not Employed	More male babies	2 to 6 years	25,000 PKR or less	Own house	9 months	male	C- section	Private hospital	No	No	Yes	4	3	3	3	5	5	5	5	5	5	1	2	2	1	2	2	2	1	3	2	1	1	0	0	0	0	0	0	0	0	0	0	0	3
16-25	Rural	High School	Not Employed	Not Employed	Equal number of male and female babies	2 to 6 years	25,000 PKR or less	With Spouse’s extended family	9 months	Female	C- section	Government hospital	No	No	Yes	2	3	4	4	4	4	5	3	3	3	2	2	1	1	2	1	2	2	1	2	1	0	0	0	0	0	0	0	0	0	0	3	0	0
35-44	Urban	No Formal education	Not Employed	Employed	More male babies	More than 6 years	26,000 – 50,000	With Spouse’s extended family	9 months	Female	Simple Vaginal delivery (Normal)	Government hospital	No	No	Yes	5	5	5	5	5	5	5	3	5	3	2	1	3	1	1	1	2	3	2	3	1	1	0	0	0	0	0	0	0	0	1	0	0	0
26-34	Urban	Primary	Not Employed	Employed	More female babies	More than 6 years	26,000 – 50,000	Own house	Less than 9 months	male	C- section	Government hospital	No	Yes	Yes	5	5	5	5	5	5	5	5	5	5	1	1	1	2	3	2	1	2	3	0	1	1	0	0	0	0	0	0	0	0	0	3	2	2
16-25	Urban	Bachelors	Not Employed	Not Employed	Equal number of male and female babies	More than 6 years	25,000 PKR or less	With Spouse’s extended family	9 months	Female	C- section	Government hospital	No	No	Yes	2	5	5	3	4	5	5	3	3	3	2	1	1	2	2	2	3	2	1	0	1	1	0	0	0	0	0	0	0	0	0	1	1	2
26-34	Urban	Bachelors	Not Employed	Employed	More male babies	More than 6 years	26,000 – 50,000	With Spouse’s extended family	9 months	male	C- section	Private hospital	No	No	Yes	5	5	6	6	5	5	6	5	5	5	1	0	0	3	2	3	2	1	3	3	1	0	0	0	0	0	0	0	0	0	1	0	0	0
16-25	Urban	Middle	Employed	Not Employed	More male babies	More than 6 years	25,000 PKR or less	With Spouse’s extended family	9 months	male	C- section	Government hospital	No	No	Yes	1	3	5	3	5	5	5	4	5	4	1	2	0	0	3	2	3	3	2	2	1	0	0	0	1	0	0	0	0	0	0	3	3	3
35-44	Urban	High School	Not Employed	Not Employed	More female babies	2 to 6 years	25,000 PKR or less	With Spouse’s extended family	9 months	Female	C- section	Government hospital	No	No	Yes	4	5	5	5	5	5	4	5	5	5	1	1	1	2	3	2	1	3	0	0	1	1	0	0	0	0	0	0	0	0	0	2	1	2
26-34	Urban	No Formal education	Not Employed	Employed	Equal number of male and female babies	More than 6 years	26,000 – 50,000	Own house	9 months	male	C- section	Government hospital	No	Yes	Yes	5	5	5	5	5	5	5	5	6	5	2	2	2	1	1	3	3	2	1	3	1	0	0	0	0	0	0	0	0	0	0	0	0	3
16-25	Urban	Primary	Not Employed	Employed	More female babies	2 to 6 years	26,000 – 50,000	Own house	9 months	Female	Simple Vaginal delivery (Normal)	Private hospital	No	No	Yes	4	4	4	4	4	4	5	4	4	4	2	1	2	2	2	1	1	2	2	1	1	0	0	1	0	0	0	0	0	0	0	3	3	3
35-44	Urban	High School	Not Employed	Not Employed	Equal number of male and female babies	More than 6 years	26,000 – 50,000	With Spouse’s extended family	9 months	male	C- section	Government hospital	No	No	Yes	5	6	6	6	6	6	6	5	6	5	1	2	2	3	2	3	3	2	3	3	1	1	0	0	0	0	0	0	0	0	0	1	1	3
35-44	Urban	Bachelors	Not Employed	Employed	More male babies	2 to 6 years	26,000 – 50,000	With Spouse’s extended family	Less than 9 months	male	C- section	Government hospital	No	No	Yes	3	5	6	5	4	4	5	5	5	5	2	0	2	2	2	1	0	3	3	1	1	0	0	0	0	0	0	0	0	0	1	0	0	0
16-25	Urban	No Formal education	Not Employed	Not Employed	More female babies	2 to 6 years	25,000 PKR or less	With Spouse’s extended family	9 months	Female	C- section	Government hospital	Yes	No	Yes	2	5	6	4	5	3	6	3	3	4	2	1	3	2	2	1	1	2	2	0	1	1	0	0	0	0	0	0	0	0	1	1	1	1
26-34	Urban	Bachelors	Employed	Employed	Equal number of male and female babies	2 to 6 years	26,000 – 50,000	Own house	9 months	Female	C- section	Government hospital	No	No	Yes	5	5	5	5	5	5	5	5	5	5	3	2	3	3	2	3	3	3	3	3	1	0	0	0	0	0	0	0	0	0	0	2	2	2
26-34	Urban	Bachelors	Not Employed	Employed	More female babies	More than 6 years	26,000 – 50,000	Own house	9 months	Female	C- section	Government hospital	No	No	Yes	5	5	5	5	6	6	5	6	5	5	1	2	3	2	2	0	3	1	1	0	1	1	0	0	0	0	0	0	0	0	0	2	2	2
26-34	Rural	Middle	Not Employed	Not Employed	More female babies	More than 6 years	25,000 PKR or less	With Spouse’s extended family	9 months	Female	C- section	Government hospital	No	No	Yes	5	5	5	5	5	5	5	5	5	5	2	1	3	1	3	3	2	1	3	3	1	0	0	0	0	0	0	0	0	0	0	0	0	0
26-34	Rural	Primary	Not Employed	Employed	Equal number of male and female babies	2 to 6 years	25,000 PKR or less	With Spouse’s extended family	9 months	male	C- section	Government hospital	No	No	Yes	5	5	5	5	4	5	5	5	5	5	1	1	3	0	2	2	1	3	1	2	1	0	0	0	0	0	0	0	0	0	0	3	3	3
16-25	Rural	High School	Not Employed	Employed	Equal number of male and female babies	2 to 6 years	25,000 PKR or less	With Spouse’s extended family	9 months	Female	C- section	Government hospital	No	No	Yes	5	5	5	5	5	5	5	5	5	5	2	3	2	2	1	2	1	1	2	2	1	1	0	0	0	0	0	0	0	0	0	3	3	2
35-44	Rural	Primary	Not Employed	Employed	More male babies	More than 6 years	25,000 PKR or less	Own house	9 months	male	C- section	Government hospital	No	No	Yes	4	4	5	5	4	4	5	5	5	5	2	1	2	1	2	2	1	2	3	3	1	1	0	0	0	0	0	0	0	0	0	3	3	3
35-44	Urban	High School	Not Employed	Not Employed	Equal number of male and female babies	2 to 6 years	25,000 PKR or less	With Spouse’s extended family	9 months	Female	Simple Vaginal delivery (Normal)	Government hospital	No	No	Yes	4	4	6	6	5	5	5	5	5	4	2	0	0	2	3	3	3	2	2	1	1	0	0	0	0	0	0	0	0	0	0	1	2	2
26-34	Urban	Middle	Not Employed	Not Employed	More female babies	2 to 6 years	25,000 PKR or less	Own house	9 months	male	C- section	Government hospital	No	No	Yes	4	5	5	5	4	4	5	3	3	3	1	2	0	2	2	1	2	3	3	3	1	1	0	0	0	0	0	0	0	0	0	2	0	0
35-44	Urban	Primary	Not Employed	Not Employed	More female babies	More than 6 years	26,000 – 50,000	Own house	9 months	male	Simple Vaginal delivery (Normal)	Government hospital	No	No	Yes	2	5	3	4	4	3	5	4	4	4	2	1	0	2	2	2	3	2	2	2	1	0	0	0	0	0	0	0	0	0	0	1	1	1
26-34	Urban	High School	Not Employed	Not Employed	More male babies	2 to 6 years	25,000 PKR or less	With Spouse’s extended family	9 months	Female	C- section	Government hospital	No	No	Yes	5	5	3	5	5	5	5	5	5	5	2	1	0	2	3	2	3	2	2	1	1	1	0	0	0	0	0	0	0	0	0	0	0	0
26-34	Urban	High School	Not Employed	Employed	More male babies	2 to 6 years	26,000 – 50,000	With Spouse’s extended family	9 months	male	C- section	Government hospital	Yes	No	Yes	4	5	4	4	5	5	5	5	5	5	3	1	2	2	2	2	1	1	3	1	1	1	0	1	0	0	0	0	0	0	0	1	1	1
16-25	Urban	Bachelors	Not Employed	Employed	More female babies	More than 6 years	26,000 – 50,000	Own house	9 months	male	C- section	Government hospital	No	No	Yes	5	5	5	5	5	5	6	5	5	5	2	1	2	1	2	2	2	1	2	2	1	1	0	0	0	0	0	0	0	0	0	1	1	1
16-25	Urban	High School	Not Employed	Employed	More male babies	More than 6 years	25,000 PKR or less	With Spouse’s extended family	9 months	Female	C- section	Government hospital	No	No	Yes	4	3	3	3	3	3	3	3	5	4	1	1	2	1	1	3	3	3	3	0	1	1	0	0	0	0	0	0	0	0	0	0	0	1
26-34	Urban	Middle	Not Employed	Employed	More female babies	2 to 6 years	26,000 – 50,000	Own house	Less than 9 months	male	C- section	Government hospital	No	Yes	Yes	3	5	5	5	5	5	5	5	5	5	1	2	2	2	1	2	2	2	2	3	1	1	0	0	0	0	0	0	0	0	0	1	1	1
35-44	Urban	High School	Not Employed	Employed	Equal number of male and female babies	More than 6 years	26,000 – 50,000	With Spouse’s extended family	9 months	Female	C- section	Government hospital	No	No	Yes	5	5	5	5	5	5	5	5	5	5	1	2	3	2	3	2	3	2	3	1	1	0	0	0	0	0	0	0	0	0	0	2	1	1
35-44	Urban	High School	Not Employed	Employed	Equal number of male and female babies	More than 6 years	50,000 – 1 lac PKR	Own house	9 months	male	C- section	Government hospital	No	No	Yes	5	5	5	5	5	5	5	5	3	4	2	2	2	3	3	2	3	2	1	2	1	0	0	1	0	0	0	0	0	0	0	2	1	2
26-34	Urban	High School	Not Employed	Employed	Equal number of male and female babies	More than 6 years	More than 1 lac PKR	With Spouse’s extended family	Less than 9 months	Female	C- section	Private hospital	Yes	No	Yes	5	5	7	3	2	4	6	4	5	5	2	1	2	2	2	1	2	1	3	3	1	0	0	0	1	0	0	0	0	0	0	2	1	3
26-34	Urban	High School	Not Employed	Employed	More female babies	2 to 6 years	50,000 – 1 lac PKR	With Spouse’s extended family	9 months	Female	C- section	Private hospital	No	Yes	Yes	5	6	6	6	5	5	5	5	6	5	1	1	3	2	2	2	3	2	2	2	1	1	0	0	0	0	0	0	0	0	0	2	0	2
35-44	Urban	Middle	Not Employed	Employed	Equal number of male and female babies	More than 6 years	26,000 – 50,000	With Spouse’s extended family	9 months	Female	C- section	Private hospital	No	No	Yes	5	6	6	6	6	6	6	6	5	5	1	1	3	2	3	2	1	0	2	1	1	1	0	1	0	0	0	0	0	0	0	0	0	0
35-44	Urban	No Formal education	Not Employed	Employed	More male babies	More than 6 years	26,000 – 50,000	With Spouse’s extended family	Less than 9 months	male	C- section	Private hospital	No	Yes	Yes	3	5	5	5	5	3	5	5	6	5	1	1	1	3	2	2	2	2	2	1	1	1	0	0	0	0	0	0	0	0	0	2	0	0
26-34	Urban	High School	Not Employed	Not Employed	More female babies	More than 6 years	26,000 – 50,000	With Spouse’s extended family	9 months	Female	C- section	Private hospital	No	No	Yes	5	5	5	3	5	5	3	3	5	5	2	2	2	2	2	2	1	3	2	2	1	0	1	0	0	0	0	0	0	0	0	2	1	0
26-34	Urban	Middle	Not Employed	Employed	More female babies	More than 6 years	26,000 – 50,000	Own house	9 months	Female	C- section	Private hospital	No	Yes	Yes	5	5	4	4	5	5	6	5	5	5	2	1	1	1	2	1	2	2	1	2	1	1	0	0	0	0	0	0	0	0	0	0	1	1
16-25	Urban	High School	Employed	Employed	More female babies	More than 6 years	50,000 – 1 lac PKR	Own house	9 months	Female	C- section	Private hospital	No	No	Yes	5	5	5	5	5	5	5	5	5	5	3	1	2	2	1	2	2	3	2	2	1	0	0	1	0	0	0	0	0	0	0	1	0	2
26-34	Urban	Middle	Not Employed	Employed	More female babies	More than 6 years	26,000 – 50,000	With Spouse’s extended family	9 months	Female	C- section	Private hospital	Yes	No	Yes	5	5	5	6	5	5	5	6	5	5	2	1	3	3	2	2	2	3	3	3	1	1	0	0	0	0	0	0	0	0	0	2	1	0
35-44	Rural	High School	Not Employed	Not Employed	More female babies	2 to 6 years	26,000 – 50,000	With Spouse’s extended family	9 months	Female	C- section	Private hospital	No	No	Yes	5	5	5	5	5	5	5	5	5	5	2	2	3	2	2	1	2	1	3	2	1	1	0	1	0	0	0	0	0	0	0	1	2	2
26-34	Urban	High School	Not Employed	Not Employed	More female babies	More than 6 years	25,000 PKR or less	Own house	9 months	Female	C- section	Private hospital	No	Yes	Yes	5	5	5	5	5	5	5	5	5	4	2	1	3	2	2	2	1	3	3	2	1	1	0	0	0	0	0	0	0	0	0	1	1	0
16-25	Urban	High School	Not Employed	Employed	More female babies	2 to 6 years	25,000 PKR or less	Own house	9 months	Female	C- section	Private hospital	No	No	Yes	3	3	5	5	5	5	5	5	4	5	2	2	2	2	2	2	2	2	2	1	1	0	0	0	1	0	0	0	0	0	0	2	1	3
26-34	Urban	Masters or higher	Not Employed	Employed	Equal number of male and female babies	More than 6 years	25,000 PKR or less	Own house	9 months	Female	C- section	Private hospital	No	No	Yes	5	5	5	5	6	5	5	6	4	6	2	1	3	2	2	2	2	3	2	2	1	1	0	0	0	0	0	0	0	0	1	0	0	0
26-34	Urban	High School	Not Employed	Not Employed	More female babies	2 to 6 years	26,000 – 50,000	With Spouse’s extended family	9 months	Female	C- section	Private hospital	Yes	No	Yes	6	6	5	6	5	5	4	5	5	5	2	1	2	2	2	1	2	3	3	2	1	0	0	0	1	0	0	0	0	0	0	0	0	0
26-34	Urban	High School	Not Employed	Not Employed	More female babies	More than 6 years	25,000 PKR or less	With Spouse’s extended family	Less than 9 months	male	C- section	Private hospital	No	Yes	Yes	5	5	5	3	3	3	7	5	3	3	1	1	3	3	3	3	3	3	3	3	1	1	0	0	1	0	0	0	0	0	0	0	0	0
26-34	Urban	Bachelors	Employed	Employed	More female babies	More than 6 years	26,000 – 50,000	Own house	9 months	Female	C- section	Private hospital	No	Yes	Yes	3	5	5	5	5	5	5	2	5	2	2	1	2	2	2	1	3	2	2	3	1	1	0	0	0	0	0	1	0	0	0	1	2	1
26-34	Urban	Primary	Not Employed	Employed	Equal number of male and female babies	2 to 6 years	26,000 – 50,000	With Spouse’s extended family	9 months	Female	C- section	Private hospital	No	Yes	Yes	5	5	5	3	3	3	7	3	7	3	2	2	2	2	2	2	1	2	1	3	1	1	0	0	0	0	0	0	0	0	0	2	2	2
26-34	Rural	High School	Not Employed	Employed	Equal number of male and female babies	2 to 6 years	25,000 PKR or less	With Spouse’s extended family	9 months	male	C- section	Private hospital	No	No	Yes	5	3	3	3	4	3	5	4	5	4	2	1	3	3	3	3	3	2	2	3	1	0	0	1	0	0	0	0	0	0	0	2	2	3
16-25	Urban	High School	Not Employed	Not Employed	More female babies	2 to 6 years	25,000 PKR or less	With Spouse’s extended family	9 months	Female	C- section	Government hospital	No	No	Yes	3	3	3	3	5	3	5	4	5	4	2	2	2	2	2	2	2	2	2	1	1	1	0	0	0	0	0	0	0	0	0	2	0	0
26-34	Urban	High School	Not Employed	Not Employed	More female babies	2 to 6 years	26,000 – 50,000	With Spouse’s extended family	9 months	male	C- section	Government hospital	No	No	Yes	5	5	5	5	5	5	5	5	5	5	2	1	2	1	2	1	3	2	3	2	1	1	0	0	0	0	0	0	0	0	0	2	0	0
26-34	Urban	Bachelors	Not Employed	Employed	More male babies	More than 6 years	26,000 – 50,000	Own house	9 months	Female	C- section	Private hospital	No	No	Yes	2	5	5	5	6	6	6	6	6	6	2	1	2	1	1	2	2	1	2	2	1	1	0	0	0	0	0	0	0	0	0	1	2	0
16-25	Urban	Primary	Not Employed	Employed	Equal number of male and female babies	More than 6 years	25,000 PKR or less	With Spouse’s extended family	Less than 9 months	Female	C- section	Government hospital	No	Yes	Yes	6	6	6	5	5	5	5	4	5	4	1	2	1	2	2	2	2	2	3	2	1	1	0	0	0	0	0	0	0	0	0	0	0	0
26-34	Urban	High School	Not Employed	Not Employed	More female babies	2 to 6 years	26,000 – 50,000	Own house	9 months	Female	C- section	Private hospital	Yes	No	Yes	5	5	3	3	5	6	5	5	5	5	2	2	2	3	1	3	3	3	2		1	1	0	0	0	0	0	0	0	0	0	3	0	0
26-34	Urban	High School	Not Employed	Not Employed	More female babies	More than 6 years	26,000 – 50,000	With Spouse’s extended family	9 months	Female	C- section	Private hospital	No	Yes	Yes	5	6	6	3	5	5	5	5	5	5	3	2	2	2	2	1	3	2	2	2	1	1	0	0	0	0	0	0	0	0	0	0	0	0
16-25	Urban	Middle	Not Employed	Employed	More female babies	2 to 6 years	25,000 PKR or less	Own house	9 months	male	C- section	Private hospital	Yes	No	Yes	5	5	7	5	5	3	5	4	5	4	2	1	2	2	2	1	2	2	2	2	1	0	0	0	1	0	0	0	0	0	0	2	1	1
16-25	Urban	High School	Not Employed	Not Employed	Equal number of male and female babies	2 to 6 years	25,000 PKR or less	With Spouse’s extended family	9 months	male	Simple Vaginal delivery (Normal)	Private hospital	No	No	Yes	2	2	2	5	5	5	5	5	5	5	2	1	1	2	2	2	2	3	3	2	1	0	0	1	0	0	0	0	0	0	0	2	2	0
26-34	Urban	Primary	Not Employed	Employed	Equal number of male and female babies	More than 6 years	25,000 PKR or less	With Spouse’s extended family	9 months	male	C- section	Private hospital	No	No	Yes	4	5	5	5	5	5	5	5	6	5	1	2	2	2	3	3	2	2	2	2	1	0	0	0	0	0	0	0	0	0	0	1	1	2
16-25	Rural	High School	Not Employed	Not Employed	More female babies	2 to 6 years	26,000 – 50,000	With Spouse’s extended family	9 months	Female	C- section	Private hospital	Yes	No	Yes	3	3	3	6	4	4	4	4	4	4	2	1	3	1	2	2	2	2	2	3	1	0	0	0	0	0	0	0	0	0	0	2	3	3
26-34	Rural	No Formal education	Not Employed	Not Employed	More female babies	2 to 6 years	25,000 PKR or less	With Spouse’s extended family	9 months	Female	C- section	Government hospital	No	Yes	Yes	4	4	6	5	4	4	5	5	5	5	1	1	1	2	2	3	3	2	2	1	1	0	0	0	1	0	0	0	0	0	0	2	2	1
26-34	Urban	Primary	Not Employed	Employed	Equal number of male and female babies	More than 6 years	25,000 PKR or less	With Spouse’s extended family	9 months	Female	Simple Vaginal delivery (Normal)	Private hospital	No	No	Yes	6	6	6	6	3	4	6	5	5	5	2	1	2	2	2	2	2	2	3	0	1	1	0	0	0	0	0	0	0	0	0	1	2	2
16-25	Rural	High School	Not Employed	Employed	More female babies	More than 6 years	26,000 – 50,000	With Spouse’s extended family	9 months	male	C- section	Private hospital	No	No	Yes	5	3	5	6	6	6	6	6	6	6	1	2	1	2	1	2	1	3	2	3	1	1	0	0	0	0	0	0	0	0	0	2	3	2
35-44	Urban	Middle	Not Employed	Employed	More male babies	More than 6 years	26,000 – 50,000	Own house	9 months	male	C- section	Private hospital	No	No	Yes	4	6	5	5	5	5	4	5	5	5	1	2	2	1	2	2	3	2	2	3	1	1	0	0	0	0	0	0	0	0	1	2	2	3
35-44	Rural	Primary	Not Employed	Employed	Equal number of male and female babies	More than 6 years	25,000 PKR or less	With Spouse’s extended family	Less than 9 months	male	C- section	Private hospital	No	Yes	Yes	3	1	5	5	5	5	6	6	5	5	1	1	2	2	2	2	3	1	2	2	1	1	0	0	0	0	0	0	0	0	0	2	1	2
26-34	Urban	High School	Not Employed	Not Employed	More male babies	2 to 6 years	26,000 – 50,000	Own house	9 months	male	C- section	Private hospital	Yes	No	Yes	4	2	5	5	3	4	3	5	3	6	2	1	3	2	2	3	2	3	2	2	1	0	0	0	0	0	0	0	0	0	0	0	0	2
26-34	Urban	High School	Not Employed	Employed	More female babies	More than 6 years	25,000 PKR or less	With Spouse’s extended family	9 months	male	Simple Vaginal delivery (Normal)	Government hospital	No	No	Yes	7	6	6	6	5	6	6	5	5	5	0	0	2	1	3	3	2	2	2	2	1	1	0	0	0	0	0	0	0	0	0	2	2	2
16-25	Rural	Bachelors	Employed	Not Employed	More female babies	More than 6 years	26,000 – 50,000	With Spouse’s extended family	9 months	male	C- section	Government hospital	No	No	Yes	4	5	5	5	5	3	3	3	5	5	2	1	2	2	3	3	3	0	3	3	1	1	0	0	0	0	0	0	0	0	0	1	2	0
26-34	Urban	Bachelors	Not Employed	Employed	More female babies	More than 6 years	26,000 – 50,000	With Spouse’s extended family	9 months	Female	C- section	Government hospital	No	Yes	Yes	5	5	5	5	5	5	5	5	5	5	1	2	2	1	3	2	1	3	2	2	1	1	0	0	0	0	0	0	0	0	0	2	1	0
16-25	Urban	Middle	Employed	Not Employed	Equal number of male and female babies	2 to 6 years	25,000 PKR or less	With Spouse’s extended family	9 months	male	Simple Vaginal delivery (Normal)	Government hospital	No	No	Yes	3	5	5	5	5	5	5	5	5	5	1	2	2	1	2	2	3	3	3	3	1	0	0	1	0	0	0	0	0	0	0	0	0	3
35-44	Urban	Bachelors	Employed	Employed	More male babies	More than 6 years	25,000 PKR or less	With Spouse’s extended family	9 months	Female	C- section	Private hospital	Yes	No	Yes	3	6	5	6	4	4	5	6	5	5	0	1	2	2	2	2	3	2	2	0	1	1	1	0	0	0	0	0	0	0	0	1	0	0
26-34	Urban	High School	Not Employed	Employed	More female babies	2 to 6 years	26,000 – 50,000	Own house	9 months	Female	C- section	Government hospital	No	Yes	Yes	5	5	5	5	5	5	5	5	5	5	1	2	3	1	2	2	1	3	2	0	1	1	0	0	0	0	0	0	0	0	0	3	2	2
26-34	Urban	Primary	Not Employed	Not Employed	Equal number of male and female babies	More than 6 years	25,000 PKR or less	With Spouse’s extended family	9 months	Female	Simple Vaginal delivery (Normal)	Government hospital	No	No	Yes	2	3	3	5	4	3	5	3	3	4	2	1	2	1	2	3	2	3	2	3	1	0	0	0	0	0	0	0	0	0	0	2	0	2
26-34	Urban	High School	Not Employed	Not Employed	More male babies	More than 6 years	25,000 PKR or less	Own house	9 months	male	C- section	Government hospital	No	No	Yes	5	5	5	5	5	5	5	5	5	5	2	1	3	2	3	2	3	2	2	3	1	1	0	1	1	0	0	0	0	0	0	0	0	3
26-34	Urban	No Formal education	Not Employed	Employed	More female babies	2 to 6 years	26,000 – 50,000	Own house	9 months	male	C- section	Government hospital	No	No	Yes	5	5	5	5	3	4	5	4	4	5	1	2	3	2	2	3	3	2	3	2	1	0	0	1	1	0	0	0	0	0	0	2	2	1
35-44	Urban	High School	Not Employed	Not Employed	More female babies	More than 6 years	26,000 – 50,000	With Spouse’s extended family	9 months	Female	C- section	Government hospital	No	No	Yes	5	4	6	4	5	4	4	4	5	4	2	1	2	1	2	1	3	3	3	0	1	1	0	0	0	0	0	0	0	0	0	3	3	3
16-25	Urban	High School	Not Employed	Employed	More female babies	2 to 6 years	26,000 – 50,000	With Spouse’s extended family	9 months	Female	C- section	Government hospital	No	No	Yes	5	5	5	5	5	5	5	5	5	5	1	1	1	2	2	2	3	3	3	2	1	1	0	0	0	0	0	0	0	0	0	2	2	3
26-34	Urban	Bachelors	Not Employed	Employed	More male babies	2 to 6 years	26,000 – 50,000	Own house	Less than 9 months	male	C- section	Home	Yes	No	Yes	5	6	6	6	6	6	6	5	6	6	2	1	2	3	2	2	3	3	3	3	1	0	0	0	0	0	0	0	0	0	0	2	1	3
26-34	Urban	Middle	Not Employed	Not Employed	More female babies	2 to 6 years	26,000 – 50,000	With Spouse’s extended family	Less than 9 months	male	C- section	Government hospital	No	No	Yes	6	6	6	5	4	4	6	6	5	5	2	1	2	1	2	3	2	3	1	0	1	0	0	0	0	0	0	0	0	0	0	3	3	3
16-25	Urban	High School	Not Employed	Employed	More female babies	2 to 6 years	25,000 PKR or less	With Spouse’s extended family	9 months	Female	C- section	Government hospital	Yes	No	Yes	5	5	5	5	5	5	5	5	6	4	1	2	3	0	3	3	3	3	3	1	1	0	0	0	0	0	0	0	0	0	0	2	2	2
26-34	Urban	Middle	Not Employed	Employed	Equal number of male and female babies	2 to 6 years	26,000 – 50,000	With Spouse’s extended family	9 months	Female	C- section	Government hospital	No	No	Yes	1	5	4	5	4	5	1	4	5	5	2	2	2	1	3	2	3	2	3	3	1	1	0	0	0	0	0	0	0	0	0	0	1	0
16-25	Rural	High School	Not Employed	Employed	More male babies	Less than one year	25,000 PKR or less	With Spouse’s extended family	Less than 9 months	male	C- section	Government hospital	Yes	No	Yes	5	6	5	6	5	5	6	5	5	5	0	0	3	3	1	1	1	3	3	1	1	1	0	0	0	0	0	0	0	0	0	1	1	3
35-44	Urban	High School	Not Employed	Not Employed	More female babies	2 to 6 years	26,000 – 50,000	With Spouse’s extended family	9 months	male	C- section	Government hospital	No	No	Yes	5	5	6	5	3	4	7	5	6	5	2	1	1	0	2	2	2	3	0	3	1	0	0	0	0	0	0	0	0	0	0	1	2	1
16-25	Urban	High School	Not Employed	Not Employed	More female babies	2 to 6 years	25,000 PKR or less	Own house	9 months	Female	Simple Vaginal delivery (Normal)	Government hospital	No	Yes	Yes	5	5	6	5	5	5	5	5	5	5	1	2	2	2	2	2	2	1	1	0	1	0	0	0	1	0	0	0	0	0	0	1	2	2
35-44	Rural	Bachelors	Employed	Employed	More male babies	2 to 6 years	26,000 – 50,000	Own house	9 months	male	C- section	Government hospital	No	No	Yes	5	6	6	6	6	6	6	6	6	6	1	2	1	1	2	1	1	2	3	1	1	1	0	0	0	0	0	0	0	0	0	1	1	1
26-34	Urban	Primary	Not Employed	Employed	More female babies	More than 6 years	25,000 PKR or less	Own house	9 months	Female	C- section	Government hospital	No	No	Yes	5	5	5	5	5	5	5	5	5	5	1	2	2	3	2	2	3	3	1	0	1	0	0	0	0	0	0	0	0	0	0	1	1	3
16-25	Urban	No Formal education	Not Employed	Employed	More male babies	2 to 6 years	25,000 PKR or less	With Spouse’s extended family	9 months	male	C- section	Government hospital	Yes	No	Yes	5	3	5	5	5	5	5	5	3	3	2	1	2	1	2	1	2	2	3	1	1	1	0	0	0	0	0	0	0	0	0	1	1	1
16-25	Urban	High School	Not Employed	Employed	More female babies	2 to 6 years	25,000 PKR or less	With Spouse’s extended family	9 months	male	C- section	Government hospital	No	No	Yes	5	4	4	5	5	4	4	5	5	5	1	2	2	1	3	1	2	3	3	0	1	0	0	0	1	0	0	0	0	0	0	2	1	1
16-25	Urban	High School	Not Employed	Not Employed	More female babies	2 to 6 years	25,000 PKR or less	With Spouse’s extended family	9 months	male	C- section	Government hospital	No	Yes	Yes	3	5	5	5	1	1	5	3	4	3	2	1	3	1	2	3	2	0	3	0	1	1	0	0	0	0	0	0	0	0	0	2	2	2
16-25	Rural	No Formal education	Not Employed	Not Employed	Equal number of male and female babies	2 to 6 years	25,000 PKR or less	With Spouse’s extended family	9 months	Female	C- section	Private hospital	Yes	No	Yes	4	5	5	5	5	5	5	5	5	5	2	1	2	2	3	3	3	2	3	2	1	1	0	0	0	0	0	0	0	0	0	2	1	2
16-25	Urban	High School	Not Employed	Not Employed	More female babies	More than 6 years	25,000 PKR or less	Own house	9 months	male	C- section	Government hospital	No	No	Yes	5	5	5	5	5	5	5	5	6	4	2	1	2	2	3	2	3	3	3	0	1	0	0	0	0	0	0	0	0	0	1	1	1	1
35-44	Urban	High School	Not Employed	Not Employed	Equal number of male and female babies	More than 6 years	25,000 PKR or less	With Spouse’s extended family	9 months	Female	C- section	Government hospital	No	No	Yes	3	3	5	5	3	4	3	3	3	4	1	2	1	2	2	3	3	3	3	1	1	0	0	0	1	0	0	0	0	0	0	2	1	1
26-34	Rural	High School	Not Employed	Not Employed	More female babies	2 to 6 years	25,000 PKR or less	Own house	Less than 9 months	male	C- section	Government hospital	No	No	Yes	4	5	5	5	4	3	5	5	5	5	0	0	2	1	2	2	3	2	3	2	1	1	0	0	0	0	0	0	0	0	0	2	1	2
35-44	Rural	Middle	Not Employed	Employed	More female babies	More than 6 years	25,000 PKR or less	With Spouse’s extended family	9 months	male	C- section	Government hospital	No	No	Yes	3	5	6	6	6	6	6	6	6	6	1	2	3	2	2	2	2	1	3	2	1	1	0	0	0	0	0	0	0	0	0	2	1	2
35-44	Urban	Primary	Not Employed	Employed	More female babies	2 to 6 years	26,000 – 50,000	Own house	9 months	Female	Simple Vaginal delivery (Normal)	Government hospital	Yes	No	Yes	6	5	6	6	6	2	6	6	5	5	1	1	1	1	2	3	3	1	3	0	1	0	0	0	0	0	0	0	0	0	1	1	1	3
26-34	Urban	High School	Not Employed	Not Employed	More female babies	Less than one year	26,000 – 50,000	Own house	Less than 9 months	Female	C- section	Government hospital	No	No	Yes	3	5	7	5	5	5	5	2	4	4	1	1	2	1	3	3	2	2	2	3	1	1	0	0	1	0	0	0	0	0	0	1	2	2
26-34	Urban	Bachelors	Employed	Employed	More male babies	2 to 6 years	25,000 PKR or less	Own house	9 months	male	C- section	Government hospital	No	No	Yes	6	6	6	6	6	6	6	6	6	6	3	0	2	2	3	2	1	3	2	3	1	1	1	0	0	0	0	0	0	0	1	0	0	0
26-34	Urban	No Formal education	Not Employed	Not Employed	More female babies	More than 6 years	26,000 – 50,000	With Spouse’s extended family	9 months	Female	C- section	Government hospital	No	Yes	Yes	4	6	7	6	7	6	7	5	7	7	2	1	2	1	1	1	1	1	1	1	1	0	0	0	0	0	0	0	1	0	1	0	2	1
16-25	Urban	Middle	Not Employed	Employed	More female babies	2 to 6 years	25,000 PKR or less	With Spouse’s extended family	9 months	male	C- section	Government hospital	No	No	Yes	5	6	6	6	6	6	6	3	3	3	1	0	2	2	3	2	2	1	1	1	1	1	0	0	0	0	0	0	0	0	1	2	1	1
26-34	Urban	No Formal education	Not Employed	Employed	More male babies	2 to 6 years	More than 1 lac PKR	Own house	9 months	Female	C- section	Government hospital	No	Yes	Yes	1	6	6	2	3	3	3	3	6	3	2	2	2	0	1	1	3	3	3	2	1	1	0	0	0	0	0	0	0	0	0	0	0	0
16-25	Urban	Primary	Not Employed	Not Employed	More female babies	More than 6 years	26,000 – 50,000	Own house	9 months	Female	C- section	Government hospital	Yes	No	Yes	3	2	3	3	5	6	6	6	6	4	1	2	0	1	2	1	3	3	2	3	1	0	0	0	0	0	0	0	1	0	1	2	2	2
35-44	Rural	High School	Not Employed	Employed	More female babies	2 to 6 years	26,000 – 50,000	Own house	9 months	Female	C- section	Government hospital	Yes	No	Yes	2	2	3	6	5	2	6	2	2	6	0	0	3	1	2	1	3	1	3	2	1	1	0	0	0	0	0	0	1	0	1	1	1	1
35-44	Urban	Primary	Not Employed	Not Employed	More male babies	2 to 6 years	25,000 PKR or less	Own house	9 months	male	C- section	Government hospital	No	No	Yes	2	6	6	3	6	1	5	3	6	7	2	0	1	0	2	3	2	3	2	1	1	0	0	0	0	0	1	0	0	0	0	2	2	3
26-34	Urban	Primary	Not Employed	Employed	More female babies	More than 6 years	25,000 PKR or less	Own house	9 months	Female	C- section	Government hospital	Yes	No	Yes	4	3	6	3	4	4	6	3	5	3	2	1	2	2	2	0	3	2	2	3	1	0	0	0	0	0	0	0	0	0	0	3	2	2
26-34	Urban	Primary	Not Employed	Employed	More female babies	2 to 6 years	25,000 PKR or less	With Spouse’s extended family	9 months	male	Simple Vaginal delivery (Normal)	Government hospital	No	No	Yes	6	3	3	3	3	5	3	5	3	5	2	1	3	2	2	2	0	2	3	1	1	0	0	0	1	0	0	0	0	0	0	2	1	3
26-34	Urban	Primary	Not Employed	Not Employed	More male babies	2 to 6 years	26,000 – 50,000	Own house	Less than 9 months	male	C- section	Government hospital	No	No	Yes	3	3	3	3	2	6	6	4	6	4	1	2	2	2	3	1	1	3	2	0	1	1	0	0	0	0	0	0	0	0	0	2	3	2
26-34	Urban	Primary	Not Employed	Employed	Equal number of male and female babies	More than 6 years	25,000 PKR or less	Own house	9 months	male	C- section	Government hospital	No	No	Yes	2	5	4	5	3	2	6	3	6	4	0	0	0	3	3	3	3	3	3	3	1	1	0	0	0	0	0	0	0	0	0	2	3	2
26-34	Urban	Primary	Not Employed	Not Employed	More female babies	More than 6 years	25,000 PKR or less	Own house	Less than 9 months	Female	C- section	Government hospital	No	No	Yes	2	5	2	7	2	3	6	3	2	2	3	3	3	3	3	3	3	3	3	3	1	0	0	0	1	0	0	0	0	0	0	2	3	2
35-44	Urban	No Formal education	Not Employed	Not Employed	Equal number of male and female babies	2 to 6 years	26,000 – 50,000	With Spouse’s extended family	Less than 9 months	Female	C- section	Government hospital	No	Yes	Yes	5	3	5	3	2	6	3	4	3	3	1	2	2	3	3	2	1	3	1	0	1	1	0	0	0	0	0	0	0	0	0	2	3	2
35-44	Urban	Primary	Not Employed	Employed	More female babies	2 to 6 years	26,000 – 50,000	With Spouse’s extended family	Less than 9 months	Female	C- section	Government hospital	No	No	Yes	2	5	6	3	6	1	1	3	3	2	1	2	3	0	2	1	3	0	3	3	1	0	0	0	0	0	0	0	1	0	0	3	2	1
26-34	Urban	Bachelors	Employed	Not Employed	More female babies	2 to 6 years	26,000 – 50,000	With Spouse’s extended family	9 months	Female	Simple Vaginal delivery (Normal)	Government hospital	No	Yes	Yes	5	2	3	1	3	2	2	3	2	2	2	1	2	2	3	2	3	2	2	3	1	1	0	0	0	0	0	0	0	0	0	3	1	2
26-34	Urban	Primary	Not Employed	Not Employed	More male babies	2 to 6 years	26,000 – 50,000	With Spouse’s extended family	9 months	Female	C- section	Government hospital	No	No	Yes	3	5	2	2	2	1	3	2	1	3	2	3	0	2	1	2	1	2	3	1	1	0	0	0	0	0	0	0	0	0	0	1	2	1
26-34	Urban	Primary	Employed	Not Employed	More female babies	More than 6 years	26,000 – 50,000	With Spouse’s extended family	Less than 9 months	Female	C- section	Private hospital	Yes	No	Yes	3	2	1	2	3	1	1	2	2	3	1	1	2	2	3	2	3	1	3	2	1	0	0	0	1	0	0	1	1	0	1	1	1	3
26-34	Rural	No Formal education	Not Employed	Not Employed	More female babies	More than 6 years	26,000 – 50,000	Own house	Less than 9 months	Female	C- section	Government hospital	Yes	No	Yes	3	3	5	3	2	1	3	2	1	3	2	1	2	2	1	3	3	2	2	3	1	1	1	0	0	0	0	0	0	0	1	3	2	3
26-34	Rural	High School	Not Employed	Employed	More female babies	2 to 6 years	26,000 – 50,000	Own house	9 months	Female	C- section	Government hospital	No	No	Yes	2	3	1	2	3	1	3	2	6	4	3	3	3	3	3	3	3	3	3	3	1	1	0	0	0	0	0	0	0	0	0	3	3	3
26-34	Urban	No Formal education	Not Employed	Employed	More female babies	More than 6 years	26,000 – 50,000	With Spouse’s extended family	9 months	Female	C- section	Government hospital	No	No	Yes	3	2	3	6	1	5	1	5	1	1	3	3	3	3	3	3	3	3	3	3	1	0	0	0	1	0	0	0	1	0	1	2	2	3
16-25	Urban	Bachelors	Not Employed	Employed	More female babies	2 to 6 years	50,000 – 1 lac PKR	Own house	9 months	male	C- section	Government hospital	Yes	No	Yes	3	3	3	2	1	3	4	3	3	3	3	3	3	3	3	3	3	3	3	3	1	0	0	1	0	0	0	0	0	0	0	1	3	2
26-34	Urban	Primary	Not Employed	Employed	More female babies	More than 6 years	26,000 – 50,000	With Spouse’s extended family	Less than 9 months	male	C- section	Government hospital	No	No	Yes	3	3	4	3	2	2	2	1	2	3	3	3	3	3	3	3	3	3	3	3	1	1	0	0	0	0	0	0	0	0	0	2	2	3
16-25	Rural	No Formal education	Not Employed	Employed	More female babies	More than 6 years	25,000 PKR or less	Own house	Less than 9 months	Female	C- section	Government hospital	Yes	Yes	Yes	6	7	6	6	1	1	6	1	6	1	3	3	3	3	3	3	3	3	3	3	1	0	0	0	0	0	0	0	0	0	1	3	3	3
16-25	Urban	Middle	Not Employed	Employed	More male babies	2 to 6 years	25,000 PKR or less	With Spouse’s extended family	9 months	male	C- section	Government hospital	No	No	Yes	3	4	3	2	2	3	3	3	1	2	3	3	3	3	0	3	3	3	3	3	1	0	0	0	1	0	0	0	0	0	1	3	3	2
26-34	Urban	Masters or higher	Not Employed	Employed	More female babies	2 to 6 years	50,000 – 1 lac PKR	With Spouse’s extended family	9 months	Female	C- section	Private hospital	No	No	Yes	5	5	6	5	4	4	4	5	5	4	3	3	3	3	2	3	3	3	3	3	1	0	0	0	0	0	0	0	0	0	0	3	3	3
35-44	Urban	Primary	Not Employed	Employed	More male babies	2 to 6 years	25,000 PKR or less	With Spouse’s extended family	9 months	Female	Simple Vaginal delivery (Normal)	Government hospital	No	No	Yes	4	5	5	3	3	3	3	2	3	3	3	3	2	1	3	2	3	3	3	1	1	0	0	0	0	0	0	0	0	0	0	2	3	2
26-34	Urban	No Formal education	Not Employed	Employed	More female babies	Less than one year	25,000 PKR or less	Own house	Less than 9 months	Female	C- section	Government hospital	No	No	Yes	5	5	2	2	1	2	3	2	3	2	3	3	3	3	3	2	1	0	3	2	1	0	1	0	0	0	0	0	0	0	0	3	2	3
35-44	Urban	Middle	Not Employed	Employed	More female babies	More than 6 years	50,000 – 1 lac PKR	With Spouse’s extended family	9 months	Female	C- section	Government hospital	No	Yes	Yes	4	3	1	7	6	7	2	2	3	7	0	0	1	1	3	3	3	3	3	3	1	0	0	0	0	0	0	0	0	0	0	3	2	3
35-44	Rural	Primary	Not Employed	Employed	More female babies	2 to 6 years	50,000 – 1 lac PKR	With Spouse’s extended family	9 months	male	C- section	Government hospital	No	Yes	Yes	3	2	1	3	2	3	2	2	3	2	3	0	0	1	3	0	3	1	3	2	1	0	0	0	0	0	0	0	0	0	1	1	2	2
35-44	Urban	High School	Not Employed	Not Employed	More female babies	More than 6 years	26,000 – 50,000	With Spouse’s extended family	Less than 9 months	Female	C- section	Government hospital	No	No	Yes	2	6	4	1	5	3	1	4	4	3	3	3	3	3	3	3	3	3	3	3	1	0	0	0	0	0	0	0	0	0	0	3	2	2
35-44	Rural	Bachelors	Not Employed	Employed	Equal number of male and female babies	2 to 6 years	26,000 – 50,000	With Spouse’s extended family	9 months	Female	C- section	Government hospital	No	Yes	Yes	2	3	2	1	4	1	3	2	3	2	3	3	3	3	0	3	3	3	3	3	1	0	0	0	1	0	0	0	0	0	0	2	3	3
35-44	Urban	Primary	Not Employed	Not Employed	More female babies	More than 6 years	25,000 PKR or less	With Spouse’s extended family	Less than 9 months	male	C- section	Government hospital	No	No	Yes	2	3	4	5	6	7	3	2	5	1	3	2	1	3	2	1	1	1	2	2	1	1	1	1	0	0	0	0	0	0	0	3	3	2
26-34	Urban	No Formal education	Not Employed	Employed	Equal number of male and female babies	More than 6 years	26,000 – 50,000	With Spouse’s extended family	9 months	Female	C- section	Government hospital	No	No	Yes	1	2	3	2	1	3	1	2	3	3	2	0	2	1	3	3	2	3	3	2	1	0	0	0	0	0	0	0	0	0	0	3	2	1
26-34	Urban	Bachelors	Employed	Employed	Equal number of male and female babies	More than 6 years	26,000 – 50,000	Own house	9 months	male	C- section	Government hospital	No	No	Yes	2	3	1	3	2	1	1	2	7	4	3	3	3	3	3	3	2	3	3	3	1	1	0	0	0	0	0	0	0	0	1	3	2	3
35-44	Urban	High School	Employed	Employed	More female babies	More than 6 years	26,000 – 50,000	Own house	9 months	Female	C- section	Government hospital	No	No	Yes	1	2	3	1	2	3	1	3	1	3	2	1	3	3	3	3	3	3	3	3	1	1	0	0	0	0	0	0	0	0	0	3	2	3
35-44	Urban	No Formal education	Not Employed	Not Employed	More male babies	More than 6 years	25,000 PKR or less	With Spouse’s extended family	9 months	Female	C- section	Government hospital	No	No	Yes	2	3	1	1	3	2	3	3	1	3	3	0	3	2	1	0	3	2	3	1	1	0	0	0	0	0	0	0	1	0	1	2	3	2
35-44	Urban	No Formal education	Not Employed	Not Employed	More female babies	More than 6 years	26,000 – 50,000	Own house	9 months	male	C- section	Government hospital	No	Yes	Yes	2	3	1	2	3	1	2	3	1	3	3	3	3	3	2	3	2	1	3	2	1	0	0	0	0	0		0	0	1	0	3	3	3
26-34	Urban	Middle	Not Employed	Not Employed	Equal number of male and female babies	More than 6 years	25,000 PKR or less	Own house	Less than 9 months	male	C- section	Government hospital	No	No	Yes	1	2	3	4	5	4	3	1	4	4	3	3	3	1	3	1	3	3	1	1	1	0	0	1	0	0	0	0	0	0	1	2	0	0
16-25	Urban	Primary	Not Employed	Not Employed	More female babies	2 to 6 years	26,000 – 50,000	Own house	9 months	male	C- section	Government hospital	No	No	Yes	3	2	1	5	4	4	3	2	2	2	3	1	2	3	3	3	3	1	1	3	1	0	0	0	0	0	0	0	0	0	1	3	2	2
35-44	Urban	Masters or higher	Employed	Employed	More male babies	More than 6 years	50,000 – 1 lac PKR	Own house	9 months	Female	Simple Vaginal delivery (Normal)	Private hospital	No	No	Yes	2	3	5	1	2	3	2	3	3	1	3	1	1	3	1	3	3	2	3	0	1	0	0	0	0	0	0	1	0	0	0	3	2	2
16-25	Urban	Primary	Not Employed	Employed	Equal number of male and female babies	2 to 6 years	26,000 – 50,000	With Spouse’s extended family	9 months	Female	C- section	Government hospital	No	No	Yes	1	2	1	3	1	2	3	1	2	3	3	1	0	1	3	0	3	1	0	1	1	1	0	0	0	0	0	0	0	0	0	3	2	3
35-44	Urban	Primary	Not Employed	Employed	Equal number of male and female babies	2 to 6 years	26,000 – 50,000	With Spouse’s extended family	9 months	Female	C- section	Government hospital	No	No	Yes	1	2	3	1	2	3	1	2	3	2	3	3	2	3	3	1	3	3	3	3	1	0	0	0	0	0	0	0	1	0	1	3	2	3
16-25	Urban	Primary	Not Employed	Employed	More female babies	More than 6 years	26,000 – 50,000	With Spouse’s extended family	9 months	Female	C- section	Government hospital	No	Yes	Yes	3	2	1	1	3	2	1	2	3	1	2	1	3	3	3	3	3	1	3	3	1	1	0	1	0	0	0	0	0	0	0	3	2	2
16-25	Urban	Primary	Not Employed	Not Employed	More male babies	2 to 6 years	26,000 – 50,000	With Spouse’s extended family	9 months	male	C- section	Government hospital	Yes	No	Yes	6	3	2	3	3	3	2	1	2	3	3	3	3	3	3	1	0	1	1	2	1	0	0	0	0	0	0	0	0	0	0	3	3	2
16-25	Urban	No Formal education	Not Employed	Not Employed	More female babies	More than 6 years	25,000 PKR or less	Own house	9 months	Female	C- section	Government hospital	No	No	Yes	4	2	1	3	4	3	2	3	1	4	1	3	3	1	0	3	0	1	3	1	1	0	0	0	1	0	0	0	0	0	0	2	3	2
26-34	Urban	Bachelors	Not Employed	Employed	More female babies	2 to 6 years	26,000 – 50,000	Own house	9 months	Female	C- section	Government hospital	No	No	Yes	1	3	2	1	2	3	3	2	1	3	3	0	3	0	3	3	3	3	3	2	1	0	0	0	0	0	0	0	0	0	0	3	2	3
26-34	Urban	Primary	Not Employed	Not Employed	More female babies	More than 6 years	26,000 – 50,000	With Spouse’s extended family	9 months	Female	C- section	Government hospital	Yes	No	Yes	2	1	3	2	3	4	1	4	4	4	3	1	0	0	1	3	3	3	1	1	1	0	0	0	0	0	0	0	1	0	0	3	2	1
26-34	Urban	No Formal education	Not Employed	Not Employed	More female babies	2 to 6 years	26,000 – 50,000	With Spouse’s extended family	9 months	Female	C- section	Government hospital	No	No	Yes	2	3	1	1	2	3	4	4	4	1	3	0	3	0	3	3	3	1	3	0	1	0	1	0	0	0	0	0	0	0	1	3	2	3
35-44	Rural	No Formal education	Not Employed	Not Employed	Equal number of male and female babies	More than 6 years	25,000 PKR or less	With Spouse’s extended family	9 months	male	C- section	Government hospital	No	No	Yes	2	3	1	3	2	1	2	3	1	3	3	3	1	3	1	0	3	3	3	3	1	0	0	0	1	0	0	0	0	0	1	2	3	3
16-25	Urban	Primary	Not Employed	Employed	More male babies	More than 6 years	25,000 PKR or less	With Spouse’s extended family	9 months	male	Simple Vaginal delivery (Normal)	Government hospital	Yes	No	Yes	2	3	4	1	3	2	4	3	2	1	3	0	3	0	3	0	3	3	1	1	1	1	0	0	0	0	0	0	0	0	0	3	2	3
26-34	Urban	Middle	Employed	Employed	Equal number of male and female babies	More than 6 years	25,000 PKR or less	With Spouse’s extended family	9 months	male	Simple Vaginal delivery (Normal)	Government hospital	No	No	Yes	2	1	3	1	2	3	4	4	6	4	3	3	2	1	0	3	3	3	2	3	1	0	0	0	0	0	0	0	0	0	0	2	3	2
26-34	Urban	Primary	Not Employed	Employed	More female babies	More than 6 years	26,000 – 50,000	With Spouse’s extended family	9 months	Female	C- section	Private hospital	No	No	Yes	1	6	1	3	4	3	2	1	3	3	3	3	3	3	3	3	3	3	3	0	1	0	0	0	0	0	0	0	0	0	0	3	2	2
35-44	Urban	Primary	Not Employed	Not Employed	More female babies	More than 6 years	26,000 – 50,000	With Spouse’s extended family	9 months	Female	C- section	Private hospital	Yes	No	Yes	4	4	3	4	5	5	2	2	3	5	3	3	0	3	0	3	3	3	3	3	1	0	1	0	0	0	0	0	0	0	0	3	2	3
35-44	Urban	No Formal education	Not Employed	Employed	More female babies	More than 6 years	50,000 – 1 lac PKR	Own house	9 months	male	Simple Vaginal delivery (Normal)	Home	Yes	No	Yes	6	7	6	5	6	7	6	7	7	6	0	0	3	3	3	3	3	3	1	1	1	1	0	1	0	0	0	0	0	0	0	3	2	3
26-34	Urban	Primary	Not Employed	Employed	More female babies	More than 6 years	26,000 – 50,000	Own house	Less than 9 months	Female	C- section	Government hospital	No	No	Yes	3	1	2	2	3	4	5	4	3	3	3	1	3	0	0	3	3	1	3	3	1	0	0	0	0	0	0	1	0	0	0	3	2	2
35-44	Urban	Middle	Not Employed	Employed	Equal number of male and female babies	2 to 6 years	26,000 – 50,000	With Spouse’s extended family	9 months	Female	C- section	Government hospital	No	No	Yes	1	3	2	3	2	1	1	2	5	3	3	1	3	0	3	0	3	3	3	1	1	1	0	0	0	0	0	0	0	0	1	2	3	2
35-44	Urban	Primary	Not Employed	Not Employed	More female babies	More than 6 years	26,000 – 50,000	With Spouse’s extended family	9 months	Female	C- section	Government hospital	No	No	Yes	2	6	3	4	4	3	2	3	3	2	3	0	3	1	1	3	1	1	3	1	1	0	0	0	0	0	0	0	0	0	1	3	2	3
26-34	Urban	Primary	Not Employed	Employed	More female babies	More than 6 years	26,000 – 50,000	With Spouse’s extended family	9 months	Female	C- section	Government hospital	No	No	Yes	3	6	7	3	3	3	3	4	3	3	0	3	3	3	0	3	3	1	3	0	1	1	0	0	0	0	0	0	0	0	0	3	2	3
35-44	Urban	Bachelors	Not Employed	Not Employed	More female babies	More than 6 years	25,000 PKR or less	With Spouse’s extended family	9 months	Female	C- section	Government hospital	No	No	Yes	2	7	3	7	4	3	2	4	7	3	2	1	3	1	3	3	1	3	3	3	1	1	0	0	0	0	0	0	0	0	0	3	2	3
35-44	Urban	Primary	Not Employed	Employed	More female babies	More than 6 years	26,000 – 50,000	With Spouse’s extended family	Less than 9 months	Female	C- section	Government hospital	No	No	Yes	2	4	6	4	3	3	4	4	3	3	3	1	1	3	3	0	3	1	1	1	1	0	0	0	0	0	0	0	0	0	0	3	2	2
16-25	Urban	Primary	Not Employed	Employed	More male babies	More than 6 years	26,000 – 50,000	With Spouse’s extended family	Less than 9 months	male	C- section	Government hospital	No	No	Yes	2	6	6	3	3	4	6	3	4	3	3	0	1	1	0	0	3	3	3	0	1	0	0	0	1	0	0	0	0	0	0	3	2	2
35-44	Urban	Middle	Not Employed	Employed	More male babies	2 to 6 years	25,000 PKR or less	Own house	Less than 9 months	male	C- section	Government hospital	No	No	Yes	2	3	4	3	4	3	2	2	3	4	3	0	3	3	3	3	1	1	3	2	1	0	0	0	0	0	0	0	0	0	0	0	3	3
35-44	Rural	Primary	Not Employed	Not Employed	More female babies	More than 6 years	25,000 PKR or less	With Spouse’s extended family	9 months	Female	C- section	Government hospital	No	No	Yes	2	6	6	3	4	4	1	1	6	1	3	3	0	0	3	3	3	3	1	3	1	1	0	1	0	0	0	0	0	0	0	3	3	2
26-34	Urban	Primary	Not Employed	Not Employed	More male babies	More than 6 years	25,000 PKR or less	Own house	Less than 9 months	male	C- section	Government hospital	No	Yes	Yes	2	7	7	6	7	7	6	7	7	7	3	3	1	0	3	1	3	1	0	3	1	1	0	0	0	0	0	0	0	0	0	2	3	3
16-25	Urban	No Formal education	Not Employed	Not Employed	More male babies	More than 6 years	25,000 PKR or less	With Spouse’s extended family	9 months	Female	C- section	Government hospital	No	No	Yes	3	7	6	5	1	4	6	5	7	4	3	1	0	1	0	0	3	3	3	3	1	1	0	0	0	0	0	0	0	0	0	0	2	3
26-34	Urban	Primary	Not Employed	Not Employed	More female babies	More than 6 years	25,000 PKR or less	With Spouse’s extended family	9 months	Female	C- section	Government hospital	No	No	Yes	2	3	2	7	6	5	7	6	5	6	3	1	0	3	3	3	1	0	3	3	1	0	0	0	0	0	0	0	0	0	0	3	2	1
35-44	Rural	No Formal education	Not Employed	Employed	No babies	2 to 6 years	26,000 – 50,000	With Spouse’s extended family	9 months	Female	Simple Vaginal delivery (Normal)	Government hospital	No	No	Yes	3	2	1	7	4	4	7	6	7	3	3	3	2	2	3	3	1	3	3	0	1	1	0	0	0	0	0	0	0	0	1	2	1	3
26-34	Urban	High School	Not Employed	Not Employed	More female babies	2 to 6 years	26,000 – 50,000	With Spouse’s extended family	Less than 9 months	male	C- section	Government hospital	No	No	Yes	2	3	7	6	6	4	1	2	7	2	3	3	0	3	3	3	3	3	1	0	1	1	0	0	0	0	0	0	0	0	1	3	1	2
26-34	Urban	Primary	Not Employed	Not Employed	More female babies	More than 6 years	25,000 PKR or less	Own house	Less than 9 months	male	C- section	Government hospital	No	No	Yes	2	4	3	1	4	2	1	4	3	3	1	3	3	0	0	1	0	3	3	0	1	0	0	0	0	0	0	1	0	0	1	2	3	2
26-34	Urban	Primary	Not Employed	Employed	More male babies	More than 6 years	26,000 – 50,000	With Spouse’s extended family	Less than 9 months	male	C- section	Government hospital	Yes	No	Yes	3	2	1	5	4	1	6	2	5	4	3	0	1	1	3	3	2	1	1	0	1	0	0	0	0	0	0	0	0	0	0	3	2	2
35-44	Urban	Primary	Not Employed	Employed	More female babies	More than 6 years	26,000 – 50,000	With Spouse’s extended family	9 months	Female	C- section	Government hospital	No	No	Yes	2	6	7	6	7	6	7	6	7	7	3	1	0	0	0	3	3	0	3	1	1	0	0	0	1	0	0	0	0	0	0	3	1	3
35-44	Urban	Primary	Not Employed	Not Employed	More female babies	More than 6 years	25,000 PKR or less	With Spouse’s extended family	Less than 9 months	Female	C- section	Government hospital	No	No	Yes	2	1	3	6	7	7	6	7	6	6	0	0	3	0	3	3	3	0	3	0	1	1	0	0	0	0	0	0	0	0	1	2	3	1
35-44	Rural	Middle	Employed	Employed	More male babies	2 to 6 years	26,000 – 50,000	With Spouse’s extended family	9 months	Female	C- section	Government hospital	No	No	Yes	7	6	6	7	6	7	7	6	6	7	3	3	3	3	1	1	3	3	3	3	1	0	1	0	0	0	0	0	0	0	0	0	3	2
35-44	Urban	Primary	Employed	Not Employed	Equal number of male and female babies	More than 6 years	26,000 – 50,000	With Spouse’s extended family	9 months	male	C- section	Government hospital	No	No	Yes	1	6	7	6	1	1	6	4	6	7	3	1	0	3	3	1	3	3	0	3	1	0	0	1	0	0	0	0	0	0	1	3	2	2
35-44	Urban	Middle	Employed	Employed	More female babies	2 to 6 years	26,000 – 50,000	Own house	Less than 9 months	Female	C- section	Government hospital	No	No	Yes	6	7	6	6	7	7	6	7	6	7	3	0	3	0	1	0	3	3	2	2	1	0	0	0	0	0	0	0	0	0	1	3	2	1
26-34	Urban	Middle	Not Employed	Employed	More male babies	More than 6 years	26,000 – 50,000	With Spouse’s extended family	9 months	male	C- section	Government hospital	Yes	Yes	Yes	7	6	4	7	4	6	7	7	6	7	2	1	2	3	0	1	1	3	3	1	1	0	0	0	0	0	0	0	0	0	1	2	3	1
26-34	Urban	Bachelors	Employed	Employed	More male babies	2 to 6 years	50,000 – 1 lac PKR	Own house	9 months	male	C- section	Private hospital	No	Yes	Yes	7	6	3	7	7	4	4	4	7	1	3	3	3	3	3	1	3	3	3		1	0	0	1	0	0	0	0	0	0	0	2	3	1
26-34	Urban	Masters or higher	Employed	Employed	More female babies	More than 6 years	26,000 – 50,000	With Spouse’s extended family	9 months	Female	C- section	Government hospital	No	No	Yes	3	2	6	3	4	1	6	3	6	3	1	3	0	3	3	3	0	0	0	0	1	0	0	0	0	0	0	0	0	0	1	3	2	3
35-44	Urban	Middle	Not Employed	Not Employed	More female babies	More than 6 years	25,000 PKR or less	With Spouse’s extended family	9 months	Female	Simple Vaginal delivery (Normal)	Government hospital	No	No	Yes	3	2	6	3	4	1	6	3	6	3	3	3	3	1	3	1	3	1	0	0	1	0	0	0	0	0	0	0	0	0	0	2	0	3
26-34	Urban	Primary	Not Employed	Employed	More male babies	More than 6 years	26,000 – 50,000	Own house	Less than 9 months	male	C- section	Government hospital	No	No	Yes	3	2	3	6	4	1	6	3	6	3	3	3	2	3	3	3	3	0	3	3	1	0	0	0	1	0	1	0	0	0	0	3	2	3
16-25	Urban	Bachelors	Not Employed	Not Employed	More male babies	More than 6 years	25,000 PKR or less	With Spouse’s extended family	9 months	male	C- section	Government hospital	Yes	No	Yes	3	2	6	3	4	1	6	3	6	3	3	0	0	3	3	3	3	0	0	2	1	0	0	1	0	0	0	0	0	0	1	0	1	2
35-44	Urban	No Formal education	Not Employed	Not Employed	More male babies	More than 6 years	25,000 PKR or less	With Spouse’s extended family	Less than 9 months	male	C- section	Private hospital	Yes	Yes	Yes	1	2	4	2	7	7	7	7	4	7	0	0	3	2	3	3	3	3	1	3	1	0	1	0	0	0	0	0	0	0	0	3	3	2
26-34	Urban	Bachelors	Not Employed	Employed	More female babies	More than 6 years	25,000 PKR or less	Own house	9 months	male	C- section	Government hospital	No	No	Yes	1	1	1	2	1	1	2	7	6	7	3	3	1	1	3	1	3	3	3	0	1	0	0	1	0	0	0	0	0	0	0	3	3	3
26-34	Urban	No Formal education	Not Employed	Not Employed	More female babies	More than 6 years	26,000 – 50,000	Own house	9 months	Female	C- section	Government hospital	No	No	Yes	5	1	2	3	5	2	7	3	2	3	1	3	3	3	3	3	3	3	0	1	1	0	1	0	0	0	0	0	0	0	1	3	2	3
16-25	Urban	Masters or higher	Not Employed	Employed	Equal number of male and female babies	More than 6 years	26,000 – 50,000	With Spouse’s extended family	9 months	Female	C- section	Government hospital	No	No	Yes	1	2	3	3	3	3	1	7	6	1	3	1	3	0	0	0	2	3	1	0	1	0	0	0	0	0	0	0	0	1	0	0	3	3
35-44	Urban	Bachelors	Not Employed	Not Employed	More female babies	More than 6 years	26,000 – 50,000	With Spouse’s extended family	Less than 9 months	Female	C- section	Government hospital	No	No	Yes	7	6	7	6	6	7	6	6	7	7	3	3	2	3	3	1	2	2	1	0	1	0	0	0	1	0	0	0	0	0	1	0	0	0
35-44	Urban	Primary	Not Employed	Not Employed	More male babies	More than 6 years	26,000 – 50,000	With Spouse’s extended family	9 months	Female	C- section	Government hospital	No	Yes	Yes	4	7	1	2	3	1	2	3	7	4	3	0	3	0	3	3	3	3	3	3	1	1	0	0	0	0	0	0	0	0	0	2	3	3
26-34	Urban	Primary	Not Employed	Employed	More male babies	More than 6 years	26,000 – 50,000	Own house	9 months	Female	Simple Vaginal delivery (Normal)	Government hospital	No	No	Yes	1	2	1	2	3	2	1	3	2	1	3	1	2	3	2	3	3	1	3	3	1	0	1	0	0	0	0	0	0	0	1	2	2	3
26-34	Urban	Primary	Not Employed	Employed	More female babies	More than 6 years	25,000 PKR or less	With Spouse’s extended family	9 months	Female	Simple Vaginal delivery (Normal)	Private hospital	No	No	Yes	2	1	2	1	2	3	2	3	1	2	3	3	3	3	3	3	3	0	0	0	1	0	0	0	0	0	0	0	0	0	1	3	2	3
26-34	Urban	High School	Not Employed	Employed	More female babies	2 to 6 years	25,000 PKR or less	With Spouse’s extended family	9 months	Female	C- section	Government hospital	No	Yes	Yes	2	3	6	6	7	6	7	7	1	6	1	1	1	3	1	3	1	1	3	3	1	0	1	0	0	0	0	0	0	0	0	3	2	3
26-34	Urban	Primary	Not Employed	Employed	More male babies	More than 6 years	26,000 – 50,000	With Spouse’s extended family	9 months	Female	Simple Vaginal delivery (Normal)	Private hospital	No	No	Yes	4	4	4	4	4	4	4	4	4	4	3	1	0	2	2	3	3	0	3	1	1	0	0	0	0	0	0	0	0	0	1	0	2	1
26-34	Urban	Middle	Not Employed	Not Employed	More female babies	More than 6 years	26,000 – 50,000	With Spouse’s extended family	9 months	male	C- section	Private hospital	No	No	Yes	1	6	7	3	4	2	2	7	2	1	3	0	2	0	3	1	1	3	2	0	1	0	0	0	0	0	0	0	0	0	1	0	1	1
26-34	Urban	Middle	Not Employed	Not Employed	More male babies	More than 6 years	26,000 – 50,000	With Spouse’s extended family	Less than 9 months	male	Simple Vaginal delivery (Normal)	Government hospital	No	No	Yes	7	6	5	7	5	6	5	6	5	7	3	1	0	1	0	0	1	3	3	0	1	1	1	0	0	0	0	0	0	0	0	3	3	2
16-25	Rural	Primary	Not Employed	Employed	More male babies	2 to 6 years	26,000 – 50,000	With Spouse’s extended family	Less than 9 months	male	Simple Vaginal delivery (Normal)	Private hospital	Yes	No	Yes	2	3	7	6	4	4	6	1	7	7	1	1	3	0	2	3	3	1	2	2	1	0	0	0	0	0	0	0	0	0	0	0	2	2
26-34	Urban	Bachelors	Not Employed	Employed	More female babies	2 to 6 years	50,000 – 1 lac PKR	With Spouse’s extended family	Less than 9 months	male	Simple Vaginal delivery (Normal)	Private hospital	No	No	Yes	7	7	7	7	7	7	7	7	7	7	1	3	2	3	3	3	3	1	3	1	1	1	0	0	1	0	0	0	0	0	0	2	3	3
26-34	Urban	Primary	Not Employed	Employed	More female babies	More than 6 years	25,000 PKR or less	With Spouse’s extended family	9 months	Female	Simple Vaginal delivery (Normal)	Government hospital	No	No	Yes	4	1	2	3	3	1	1	1	1	2	3	0	3	3	3	3	3	0	0	0	1	0	0	0	0	0	0	0	1	0	0	0	0	3
35-44	Urban	High School	Not Employed	Not Employed	More female babies	More than 6 years	26,000 – 50,000	With Spouse’s extended family	Less than 9 months	Female	C- section	Government hospital	No	No	Yes	7	2	7	2	1	2	4	4	2	1	3	1	1	3	1	1	3	0	3	0	1	0	0	0	0	0	0	0	0	0	0	1	1	3
26-34	Urban	Primary	Not Employed	Employed	More male babies	2 to 6 years	26,000 – 50,000	With Spouse’s extended family	9 months	Female	C- section	Government hospital	No	No	Yes	2	6	4	4	3	3	4	3	6	4	0	1	3	3	0	2	3	3	0	0	1	0	0	0	0	0	0	0	0	0	1	3	1	3
26-34	Urban	Bachelors	Employed	Not Employed	More female babies	2 to 6 years	25,000 PKR or less	With Spouse’s extended family	9 months	Female	C- section	Government hospital	No	Yes	Yes	3	2	6	3	4	1	6	3	6	3	3	3	1	3	3	3	3	3	0	0	1	0	0	0	1	0	0	0	0	0	0	1	2	2
26-34	Urban	High School	Not Employed	Employed	More male babies	More than 6 years	25,000 PKR or less	With Spouse’s extended family	Less than 9 months	Female	C- section	Government hospital	No	No	Yes	2	3	5	2	1	1	2	4	7	2	3	1	0	1	3	1	1	1	1	3	1	0	0	0	0	0	0	0	0	0	1	3	0	3
26-34	Urban	Middle	Not Employed	Employed	More female babies	More than 6 years	26,000 – 50,000	With Spouse’s extended family	9 months	Female	C- section	Government hospital	No	No	Yes	3	6	6	3	4	3	4	1	3	3	3	3	1	1	0	3	1	3	3	3	1	0	0	0	0	0	0	0	0	0	0	1	3	3
26-34	Urban	No Formal education	Not Employed	Employed	Equal number of male and female babies	2 to 6 years	26,000 – 50,000	With Spouse’s extended family	9 months	Female	Simple Vaginal delivery (Normal)	Government hospital	No	Yes	Yes	7	6	6	7	6	4	7	7	6	6	0	1	2	2	3	1	2	3	3	3	1	1	0	0	0	0	0	0	0	0	0	3	1	2
26-34	Urban	Middle	Not Employed	Employed	More female babies	More than 6 years	26,000 – 50,000	With Spouse’s extended family	9 months	Female	C- section	Private hospital	No	No	Yes	3	2	2	6	7	7	1	2	7	4	3	3	2	1	3	3	3	3	1	3	1	1	0	0	0	0	0	0	0	0	0	0	3	2
26-34	Urban	Primary	Not Employed	Not Employed	More female babies	More than 6 years	26,000 – 50,000	With Spouse’s extended family	Less than 9 months	Female	Simple Vaginal delivery (Normal)	Government hospital	No	No	Yes	1	3	6	7	6	4	4	1	7	2	3	1	1	3	3	3	1	3	1	3	1	0	0	0	0	0	0	0	0	0	0	0	0	2
16-25	Urban	No Formal education	Not Employed	Not Employed	More female babies	More than 6 years	26,000 – 50,000	With Spouse’s extended family	9 months	Female	C- section	Government hospital	No	No	Yes	6	1	2	7	4	4	6	4	5	4	3	3	3	3	1	3	0	3	0	0	1	0	1	0	0	0	0	0	0	0	0	3	2	2
26-34	Urban	Middle	Not Employed	Employed	More female babies	Less than one year	26,000 – 50,000	With Spouse’s extended family	9 months	Female	Simple Vaginal delivery (Normal)	Government hospital	Yes	No	Yes	1	7	2	4	4	4	2	6	4	4	3	1	2	1	3	2	3	0	3	3	1	0	0	1	0	0	0	0	0	0	1	3	2	0
26-34	Urban	High School	Not Employed	Not Employed	More female babies	More than 6 years	26,000 – 50,000	With Spouse’s extended family	Less than 9 months	Female	C- section	Government hospital	No	No	Yes	3	2	6	2	6	4	4	4	2	4	3	3	2	3	2	3	3	0	2	3	1	0	0	0	0	0	0	0	0	0	0	2	3	1
16-25	Urban	Primary	Not Employed	Employed	More male babies	2 to 6 years	26,000 – 50,000	With Spouse’s extended family	9 months	Female	C- section	Government hospital	No	No	Yes	3	2	1	2	4	5	3	3	1	2	1	0	0	3	3	3	3	3	3	3	1	0	0	0	0	0	0	0	0	0	1	0	0	0
26-34	Urban	No Formal education	Not Employed	Employed	More male babies	More than 6 years	25,000 PKR or less	With Spouse’s extended family	Less than 9 months	male	C- section	Government hospital	No	Yes	Yes	3	2	1	2	1	3	6	1	3	1	3	0	3	0	1	1	3	0	3	3	1	0	0	0	0	0	0	0	0	0	1	3	3	3
26-34	Urban	High School	Not Employed	Employed	More female babies	2 to 6 years	25,000 PKR or less	With Spouse’s extended family	9 months	Female	C- section	Government hospital	No	Yes	Yes	1	7	1	7	4	4	4	4	4	1	0	0	0	0	3	3	3	3	3	3	1	0	0	0	0	0	0	0	0	0	1	0	3	2
16-25	Rural	Bachelors	Not Employed	Employed	More female babies	2 to 6 years	25,000 PKR or less	Own house	Less than 9 months	Female	C- section	Government hospital	No	No	Yes	3	6	1	6	4	3	1	2	2	1	2	3	3	0	3	3	3	0	3	3	1	0	0	0	0	0	0	0	0	0	1	2	0	3
26-34	Urban	No Formal education	Not Employed	Not Employed	More male babies	More than 6 years	26,000 – 50,000	With Spouse’s extended family	Less than 9 months	Female	C- section	Government hospital	No	No	Yes	2	6	7	6	4	4	7	6	7	6	1	0	0	1	3	1	3	3	3	0	1	0	0	0	0	0	0	0	0	0	1	3	2	1
26-34	Urban	Middle	Not Employed	Employed	More female babies	2 to 6 years	26,000 – 50,000	With Spouse’s extended family	9 months	Female	C- section	Government hospital	Yes	No	Yes	7	6	3	4	4	4	3	4	2	4	2	3	3	1	1	2	2	3	1	0	1	1	0	0	0	0	0	0	0	0	0	0	3	3
26-34	Urban	No Formal education	Not Employed	Not Employed	More male babies	More than 6 years	26,000 – 50,000	Own house	9 months	male	C- section	Government hospital	No	No	Yes	3	2	3	2	4	4	7	4	7	4	1	0	0	3	3	1	3	1	2	3	1	0	0	0	0	0	0	0	0	0	1	2	3	2
45+	Urban	No Formal education	Employed	Employed	More male babies	2 to 6 years	26,000 – 50,000	Own house	9 months	male	C- section	Government hospital	No	No	Yes	1	2	6	2	3	2	3	3	2	4	3	3	1	3	3	0	2	2	2	2	1	0	0	0	0	0	0	0	0	0	1	3	1	1
35-44	Urban	No Formal education	Not Employed	Employed	Equal number of male and female babies	2 to 6 years	25,000 PKR or less	With Spouse’s extended family	9 months	male	Simple Vaginal delivery (Normal)	Government hospital	No	No	Yes	3	2	6	3	4	1	6	3	6	3	1	0	3	3	3	0	3	3	1	3	1	0	0	0	0	0	0	0	0	0	0	3	2	2
26-34	Urban	Primary	Not Employed	Not Employed	More male babies	2 to 6 years	25,000 PKR or less	With Spouse’s extended family	9 months	Female	C- section	Government hospital	No	No	Yes	3	4	4	3	4	4	1	2	3	2	3	3	3	1	3	2	3	3	3	3	1	0	0	0	0	0	0	0	0	0	1	2	3	1
26-34	Urban	Middle	Not Employed	Employed	More female babies	2 to 6 years	26,000 – 50,000	With Spouse’s extended family	9 months	Female	C- section	Government hospital	No	No	Yes	3	2	3	1	3	2	1	3	2	1	3	3	1	1	1	1	1	3	3	3	1	0	0	0	0	0	0	0	0	0	0	3	2	3
26-34	Urban	Middle	Not Employed	Employed	Equal number of male and female babies	More than 6 years	26,000 – 50,000	With Spouse’s extended family	9 months	Female	C- section	Government hospital	No	No	Yes	3	2	1	2	3	1	2	3	2	3	3	0	3	2	3	3	3	1	3	3	1	0	0	0	0	0	0	0	0	0	0	2	3	1
26-34	Urban	No Formal education	Not Employed	Employed	More male babies	2 to 6 years	25,000 PKR or less	With Spouse’s extended family	9 months	male	Simple Vaginal delivery (Normal)	Government hospital	No	No	Yes	3	2	3	1	1	2	1	3	3	3	2	3	3	0	3	3	3	0	3	3	1	1	0	0	0	0	0	0	0	0	0	2	1	3
35-44	Rural	Bachelors	Employed	Employed	More female babies	More than 6 years	26,000 – 50,000	With Spouse’s extended family	9 months	Female	C- section	Government hospital	No	No	Yes	2	3	2	7	7	1	2	3	7	1	3	1	0	0	3	3	2	3	3	1	1	0	0	0	0	0	0	0	0	0	1	2	3	2
26-34	Urban	Primary	Not Employed	Employed	More male babies	2 to 6 years	26,000 – 50,000	With Spouse’s extended family	9 months	Female	C- section	Government hospital	No	No	Yes	2	1	3	3	4	1	4	4	6	3	3	3	3	0	3	0	3	2	1	2	1	0	0	1	0	0	0	0	0	0	0	3	0	3
26-34	Urban	Primary	Not Employed	Not Employed	More female babies	More than 6 years	26,000 – 50,000	With Spouse’s extended family	Less than 9 months	male	C- section	Government hospital	No	No	Yes	4	6	4	3	4	4	2	1	2	3	3	3	2	1	0	3	2	1	3	3	1	1	0	0	0	0	0	0	0	0	1	3	2	3
16-25	Urban	Middle	Not Employed	Employed	No babies	More than 6 years	26,000 – 50,000	Own house	Less than 9 months	Female	C- section	Government hospital	No	No	Yes	1	7	1	6	2	2	1	2	7	2	3	0	2	0	3	3	0	3	3	1	1	0	0	0	0	0	0	0	0	0	0	2	3	0
26-34	Urban	Middle	Not Employed	Employed	More female babies	More than 6 years	25,000 PKR or less	With Spouse’s extended family	9 months	Female	C- section	Government hospital	No	No	Yes	2	6	4	7	6	6	3	6	1	7	2	1	2	3	2	3	0	0	3	1	1	0	1	0	0	0		0	0	0	0	3	0	2
16-25	Rural	Primary	Not Employed	Employed	More female babies	2 to 6 years	26,000 – 50,000	With Spouse’s extended family	9 months	Female	Simple Vaginal delivery (Normal)	Government hospital	No	No	Yes	6	3	2	7	7	1	6	1	6	4	0	2	3	1	1	3	1	1	0	3	1	0	0	0	0	0	0	0	0	0	1	2	0	3
26-34	Urban	Middle	Not Employed	Not Employed	More female babies	2 to 6 years	26,000 – 50,000	Own house	9 months	Female	C- section	Government hospital	No	No	Yes	3	2	6	3	4	1	6	5	6	3	1	3	0	3	3	0	1	1	0	0	1	0	0	0	0	0	0	0	0	0	0	1	3	0
26-34	Urban	Bachelors	Not Employed	Not Employed	More female babies	More than 6 years	26,000 – 50,000	With Spouse’s extended family	9 months	Female	C- section	Government hospital	No	No	Yes	2	3	6	7	4	3	6	2	7	3	0	3	0	3	0	3	0	3	0	2	1	0	0	0	0	0	0	0	0	0	1	2	0	3
26-34	Urban	Primary	Not Employed	Employed	More female babies	More than 6 years	26,000 – 50,000	With Spouse’s extended family	9 months	Female	C- section	Government hospital	Yes	No	Yes	1	2	3	2	3	1	3	2	1	3	1	2	1	1	0	2	1	3	1	0	1	0	0	1	0	0	0	0	0	0	0	0	1	0
26-34	Urban	Bachelors	Not Employed	Employed	More male babies	Less than one year	26,000 – 50,000	With Spouse’s extended family	9 months	male	C- section	Government hospital	Yes	No	Yes	2	3	1	3	4	1	3	1	2	4	1	1	3	1	3	2	3	0	0	0	1	0	0	0	0	0	0	0	0	1	0	2	1	1
35-44	Rural	High School	Not Employed	Employed	More female babies	More than 6 years	26,000 – 50,000	With Spouse’s extended family	Less than 9 months	Female	Simple Vaginal delivery (Normal)	Government hospital	No	No	Yes	3	2	3	1	4	3	1	2	3	4	3	3	3	0	1	3	0	1	0	0	1	0	0	0	0	0	0	0	0	0	0	0	2	3
35-44	Rural	No Formal education	Not Employed	Employed	More female babies	More than 6 years	26,000 – 50,000	With Spouse’s extended family	9 months	Female	C- section	Government hospital	No	No	Yes	6	7	6	7	6	7	1	6	7	6	3	3	0	3	3	1	0	1	3	3	1	0	0	0	0	0	0	0	0	0	0	1	3	1
26-34	Urban	Primary	Not Employed	Employed	More male babies	2 to 6 years	26,000 – 50,000	With Spouse’s extended family	9 months	Female	Simple Vaginal delivery (Normal)	Government hospital	No	No	Yes	3	4	2	4	6	7	4	5	7	6	3	0	3	3	1	2	3	0	0	0	1	0	0	0	0	0	0	0	0	1	0	0	2	3
26-34	Urban	Bachelors	Employed	Not Employed	More female babies	2 to 6 years	26,000 – 50,000	With Spouse’s extended family	9 months	Female	C- section	Government hospital	No	Yes	Yes	7	6	4	7	6	6	2	6	6	1	3	3	0	0	3	1	3	1	3	0	1	0	1	0	0	0	0	0	0	0	0	3	2	0
35-44	Urban	No Formal education	Not Employed	Not Employed	More female babies	2 to 6 years	26,000 – 50,000	With Spouse’s extended family	9 months	Female	C- section	Government hospital	No	No	Yes	4	6	7	4	4	4	6	4	6	7	3	0	3	0	0	3	3	1	3	0	1	0	0	0	0	0	0	0	0	0	0	3	2	1
26-34	Urban	No Formal education	Not Employed	Employed	No babies	2 to 6 years	25,000 PKR or less	Own house	9 months	Female	C- section	Government hospital	No	No	Yes	2	3	1	2	1	3	3	4	2	1	3	3	3	3	3	3	3	1	3	1	1	0	1	0	0	0	0	0	0	0	0	3	2	1
26-34	Urban	No Formal education	Not Employed	Not Employed	More female babies	More than 6 years	25,000 PKR or less	With Spouse’s extended family	Less than 9 months	Female	Simple Vaginal delivery (Normal)	Private hospital	No	No	Yes	1	3	6	3	4	4	6	4	4	4	3	0	3	3	3	3	0	3	3	2	1	0	0	0	0	0	0	0	0	0	0	3	2	1
26-34	Urban	Primary	Not Employed	Not Employed	More male babies	More than 6 years	26,000 – 50,000	With Spouse’s extended family	9 months	Female	C- section	Government hospital	No	No	Yes	7	6	4	3	4	1	4	4	5	2	1	3	1	0	3	1	3	0	0	3	1	0	1	0	0	0	0	0	0	0	0	2	3	1
26-34	Urban	Primary	Not Employed	Not Employed	More male babies	2 to 6 years	26,000 – 50,000	With Spouse’s extended family	9 months	male	C- section	Government hospital	Yes	No	Yes	7	1	2	4	2	4	7	6	2	4	3	3	0	2	3	1	3	0	0	1	1	1	0	0	0	0	0	0	0	0	1	3	2	1
35-44	Urban	Bachelors	Employed	Not Employed	Equal number of male and female babies	More than 6 years	26,000 – 50,000	With Spouse’s extended family	9 months	Female	Simple Vaginal delivery (Normal)	Government hospital	No	No	Yes	4	6	3	6	4	3	6	2	3	4	0	1	1	3	3	3	3	3	0	3	1	0	0	0	0	0	0	0	0	0	0	2	3	2
35-44	Urban	No Formal education	Not Employed	Not Employed	Equal number of male and female babies	More than 6 years	26,000 – 50,000	With Spouse’s extended family	9 months	Female	C- section	Government hospital	No	No	Yes	4	2	3	6	7	6	7	6	7	1	1	1	3	3	3	1	3	3	3	3	1	0	0	0	0	0	0	0	0	0	0	3	2	3
26-34	Urban	Bachelors	Not Employed	Employed	More male babies	More than 6 years	25,000 PKR or less	Own house	Less than 9 months	Female	C- section	Government hospital	No	Yes	Yes	2	3	1	3	1	3	1	3	7	2	3	0	0	3	3	1	3	1	3	1	1	0	0	0	0	0	0	0	0	1	1	1	3	3
26-34	Urban	Bachelors	Not Employed	Employed	More male babies	More than 6 years	26,000 – 50,000	With Spouse’s extended family	Less than 9 months	Female	C- section	Government hospital	No	No	Yes	7	6	3	7	6	1	7	6	4	6	3	3	3	1	3	3	3	1	1	0	1	1	0	0	0	0	0	0	0	0	0	0	0	3
26-34	Urban	Bachelors	Employed	Employed	More female babies	More than 6 years	50,000 – 1 lac PKR	With Spouse’s extended family	9 months	Female	C- section	Government hospital	No	No	Yes	7	6	2	1	3	7	6	7	1	7	3	1	1	3	1	0	3	3	0	3	1	1	0	0	0	0	0	0	0	0	0	0	1	0
26-34	Urban	Primary	Not Employed	Employed	Equal number of male and female babies	2 to 6 years	26,000 – 50,000	Own house	Less than 9 months	Female	C- section	Government hospital	Yes	Yes	Yes	6	6	7	1	7	6	2	7	1	4	3	0	3	3	0	3	1	3	0	3	1	1	0	0	0	0	0	0	0	0	0	3	2	1
16-25	Urban	No Formal education	Not Employed	Employed	No babies	More than 6 years	26,000 – 50,000	Own house	Less than 9 months	male	C- section	Government hospital	No	No	Yes	1	3	6	1	7	1	1	2	2	4	3	0	3	3	3	3	1	3	1	0	1	0	0	0	0	0	0	0	0	0	1	3	0	2
35-44	Urban	Bachelors	Not Employed	Not Employed	More female babies	More than 6 years	26,000 – 50,000	With Spouse’s extended family	9 months	Female	C- section	Government hospital	No	No	Yes	2	1	3	1	4	7	7	4	1	6	3	0	3	3	1	3	0	3	3	3	1	0	0	0	0	0	0	0	0	0	0	3	0	3
26-34	Urban	Primary	Not Employed	Not Employed	Equal number of male and female babies	More than 6 years	26,000 – 50,000	With Spouse’s extended family	9 months	Female	C- section	Government hospital	No	No	Yes	7	6	7	2	4	4	2	6	2	4	1	0	2	3	1	3	0	3	0	0	1	0	0	0	0	0	0	0	0	0	1	2	3	0
26-34	Urban	High School	Not Employed	Not Employed	More male babies	More than 6 years	26,000 – 50,000	With Spouse’s extended family	9 months	Female	C- section	Government hospital	No	No	Yes	1	6	2	5	2	6	3	2	6	2	2	0	0	3	1	1	3	1	0	2	1	1	0	0	0	0	0	1	0	0	0	0	1	2
26-34	Urban	Primary	Not Employed	Not Employed	Equal number of male and female babies	2 to 6 years	26,000 – 50,000	With Spouse’s extended family	9 months	Female	C- section	Government hospital	No	No	Yes	4	1	3	6	2	3	6	3	4	3	2	3	0	0	2	3	1	2	1	0	1	0	0	0	0	0	0	0	0	0	0	3	0	2
35-44	Urban	No Formal education	Not Employed	Employed	More female babies	More than 6 years	50,000 – 1 lac PKR	With Spouse’s extended family	Less than 9 months	Female	C- section	Government hospital	No	Yes	Yes	6	3	7	3	7	2	7	3	6	4	1	2	0	1	3	1	3	1	3	0	1	1	0	0	0	0	0	0	0	0	0	0	2	3
26-34	Urban	Middle	Employed	Not Employed	Equal number of male and female babies	More than 6 years	50,000 – 1 lac PKR	With Spouse’s extended family	Less than 9 months	male	C- section	Government hospital	No	No	Yes	2	1	6	2	7	3	1	6	7	4	3	3	2	3	3	1	1	3	1	1	1	0	0	0	0	0	0	0	0	0	0	2	3	1
26-34	Urban	Primary	Not Employed	Employed	Equal number of male and female babies	2 to 6 years	26,000 – 50,000	With Spouse’s extended family	9 months	Female	C- section	Government hospital	No	No	Yes	4	6	2	6	2	6	2	6	7	2	2	0	1	3	1	0	3	2	0	0	1	0	0	0	0	0	0	0	0	0	1	3	0	1
26-34	Urban	No Formal education	Not Employed	Employed	More female babies	More than 6 years	26,000 – 50,000	With Spouse’s extended family	Less than 9 months	Female	C- section	Government hospital	No	No	Yes	2	6	1	3	4	3	1	2	4	1	2	3	0	1	1	3	3	1	3	0	1	0	0	0	0	0	0	0	0	0	1	3	1	2
26-34	Urban	Primary	Not Employed	Employed	More female babies	More than 6 years	26,000 – 50,000	Own house	Less than 9 months	Female	C- section	Government hospital	No	No	Yes	5	3	2	5	4	1	4	6	2	1	3	0	1	3	3	0	3	1	3	1	1	0	0	0	0	0	0	0	0	0	1	3	2	0
26-34	Urban	Middle	Not Employed	Employed	More female babies	2 to 6 years	26,000 – 50,000	With Spouse’s extended family	9 months	Female	C- section	Government hospital	No	No	Yes	6	7	6	7	6	4	2	3	4	4	3	0	2	2	3	1	3	3	1	0	1	0	0	0	1	0	0	1	0	0	1	3	2	2
26-34	Urban	No Formal education	Not Employed	Not Employed	More male babies	More than 6 years	26,000 – 50,000	With Spouse’s extended family	9 months	Female	C- section	Government hospital	No	No	Yes	4	6	7	6	3	3	6	1	4	3	1	3	3	1	3	1	3	1	0	0	1	0	0	0	0	0	0	0	0	1	0	0	2	3
26-34	Urban	Bachelors	Not Employed	Employed	Equal number of male and female babies	2 to 6 years	26,000 – 50,000	With Spouse’s extended family	9 months	male	C- section	Government hospital	No	Yes	Yes	1	3	2	7	4	4	2	6	2	3	0	1	1	0	3	3	0	3	0	2	1	1	0	1	1	0	0	0	0	0	0	2	3	1
26-34	Urban	Bachelors	Not Employed	Not Employed	More female babies	Less than one year	26,000 – 50,000	With Spouse’s extended family	9 months	Female	C- section	Government hospital	No	No	Yes	6	2	6	4	2	4	6	3	2	2	3	2	0	0	1	3	2	3	3	0	1	0	0	0	1	0	0	0	0	0	1	3	3	2
35-44	Urban	Bachelors	Not Employed	Not Employed	Equal number of male and female babies	2 to 6 years	50,000 – 1 lac PKR	With Spouse’s extended family	9 months	Female	Simple Vaginal delivery (Normal)	Private hospital	No	No	Yes	3	4	6	7	4	7	7	6	4	4	0	2	3	3	3	1	2	0	0	2	1	0	0	0	0	0	0	0	0	0	1	3	2	2
26-34	Urban	Primary	Not Employed	Not Employed	More female babies	2 to 6 years	26,000 – 50,000	With Spouse’s extended family	9 months	Female	C- section	Government hospital	No	No	Yes	6	2	1	6	2	3	2	3	7	2	3	1	3	1	0	0	3	3	0	1	1	0	0	0	1	0	0	0	0	0	0	3	2	3
35-44	Urban	No Formal education	Not Employed	Not Employed	Equal number of male and female babies	More than 6 years	26,000 – 50,000	With Spouse’s extended family	Less than 9 months	Female	C- section	Private hospital	No	No	Yes	2	3	6	7	3	4	2	3	4	4	3	3	0	3	0	0	3	2	1	3	1	1	0	0	0	0	0	0	0	0	1	1	3	2
35-44	Urban	High School	Not Employed	Employed	Equal number of male and female babies	More than 6 years	50,000 – 1 lac PKR	With Spouse’s extended family	Less than 9 months	Female	C- section	Government hospital	No	No	Yes	2	3	6	7	4	4	6	6	4	7	3	3	3	3	3	3	0	0	3	3	1	0	0	0	0	1	0	0	0	0	0	1	2	3
35-44	Urban	Middle	Not Employed	Not Employed	More female babies	2 to 6 years	50,000 – 1 lac PKR	With Spouse’s extended family	9 months	Female	C- section	Government hospital	No	No	Yes	2	1	3	1	3	2	2	7	2	2	0	0	3	3	3	3	3	3	2	3	1	1	0	0	0	0	0	0	0	0	1	2	3	2
35-44	Rural	Primary	Not Employed	Not Employed	Equal number of male and female babies	2 to 6 years	26,000 – 50,000	With Spouse’s extended family	9 months	Female	C- section	Government hospital	No	No	Yes	4	2	4	4	6	7	4	6	6	6	2	2	3	2	1	0	0	0	3	3	1	1	0	0	0	0	0	0	0	0	1	3	1	3
26-34	Urban	Middle	Not Employed	Employed	More male babies	More than 6 years	More than 1 lac PKR	With Spouse’s extended family	Less than 9 months	Female	C- section	Government hospital	No	No	Yes	6	7	6	7	7	6	1	7	6	4	3	2	0	3	3	3	1	2	1	3	1	0	1	0	0	0	0	0	0	0	0	3	3	3
26-34	Urban	No Formal education	Not Employed	Employed	More female babies	More than 6 years	26,000 – 50,000	With Spouse’s extended family	9 months	male	C- section	Government hospital	No	Yes	Yes	6	7	4	6	7	4	6	4	6	7	3	0	0	3	3	1	3	3	1	0	1	0	0	0	0	0	0	0	0	1	0	2	3	3
35-44	Urban	Bachelors	Not Employed	Employed	Equal number of male and female babies	More than 6 years	50,000 – 1 lac PKR	With Spouse’s extended family	9 months	Female	C- section	Government hospital	No	No	Yes	1	3	3	7	6	7	4	6	7	6	1	0	3	3	3	2	3	1	3	1	1	0	0	0	0	0	0	0	0	0	1	0	2	3
16-25	Urban	Primary	Not Employed	Employed	More male babies	More than 6 years	26,000 – 50,000	With Spouse’s extended family	9 months	male	C- section	Private hospital	Yes	No	Yes	6	7	7	6	6	6	7	7	6	7	3	1	3	3	3	0	3	3	1	3	1	0	0	0	0	0	0	0	1	1	1	2	2	3
26-34	Urban	Bachelors	Not Employed	Employed	More female babies	More than 6 years	26,000 – 50,000	With Spouse’s extended family	9 months	Female	C- section	Government hospital	No	No	Yes	6	6	1	3	3	4	3	4	1	3	2	3	2	3	2	3	3	3	0	2	1	0	1	0	0	0	0	0	0	1	1	2	0	3
26-34	Urban	Middle	Not Employed	Not Employed	More female babies	Less than one year	26,000 – 50,000	With Spouse’s extended family	9 months	Female	C- section	Government hospital	Yes	No		5	5	5	5	5	5	5	5	5	5	1	2	1	1	1	1	3	3	3	3	1	0	0	0	0	0	0	0	0	0	0	2	0	2
26-34	Urban	No Formal education	Not Employed	Employed	More female babies	2 to 6 years	26,000 – 50,000	With Spouse’s extended family	9 months	male	C- section	Private hospital	Yes	No	Yes	6	6	6	5	6	6	5	5	5	5	1	1	2	2	2	2	1	1	1	2	1	1	1	1	0	0	0	1	1	0	0	1	2	2
26-34	Urban	Primary	Not Employed	Employed	More female babies	2 to 6 years	26,000 – 50,000	Own house	Less than 9 months	male	Simple Vaginal delivery (Normal)	Government hospital	No	No	Yes	5	3	4	5	4	4	5	4	5	4	0	1	1	3	2	1	1	2	1	0	1	1	0	0	0	0	0	0	0	0	0	2	2	2
26-34	Urban	Primary	Not Employed	Employed	More female babies	2 to 6 years	25,000 PKR or less	With Spouse’s extended family	Less than 9 months	Female	C- section	Government hospital	No	No	Yes	4	5	5	5	5	5	5	5	5	5	2	1	3	2	1	2	2	2	1	0	1	0	0	1	0	0	0	0	0	0	0	2	2	0
35-44	Urban	No Formal education	Not Employed	Employed	More female babies	2 to 6 years	25,000 PKR or less	With Spouse’s extended family	Less than 9 months	Female	C- section	Government hospital	No	No	Yes	4	5	3	3	5	5	5	5	3	5	1	1	3	2	2	1	2	1	1	1	1	1	0	0	0	0	0	0	0	0	0	2	1	2
26-34	Urban	Primary	Not Employed	Employed	More female babies	More than 6 years	26,000 – 50,000	With Spouse’s extended family	Less than 9 months	Female	C- section	Government hospital	No	No	Yes	5	3	5	5	5	5	5	6	6	5	1	1	1	3	2	2	2	1	3	0	1	1	1	0	0	0	0	0	0	0	0	2	2	2
16-25	Urban	High School	Not Employed	Not Employed	More female babies	2 to 6 years	50,000 – 1 lac PKR	Own house	9 months	male	C- section	Government hospital	No	No	Yes	5	5	3	5	3	5	5	5	5	5	1	1	1	1	1	2	2	2	2	2	1	1	0	0	0	0	0	0	0	0	0	1	1	1
26-34	Urban	High School	Not Employed	Not Employed	More female babies	2 to 6 years	26,000 – 50,000	With Spouse’s extended family	Less than 9 months	Female	Simple Vaginal delivery (Normal)	Government hospital	No	No	Yes	6	6	5	6	5	5	5	5	6	5	1	1	1	2	1	2	2	1	2	1	1	1	1	1	0	0	0	0	0	0	0	0	0	0
16-25	Urban	High School	Not Employed	Not Employed	More female babies	More than 6 years	26,000 – 50,000	With Spouse’s extended family	Less than 9 months	Female	Simple Vaginal delivery (Normal)	Government hospital	No	No	Yes	3	3	4	2	5	5	5	5	5	5	2	1	3	3	0	1	2	2	2	0	1	0	0	0	0	0	0	0	1	0	0	2	1	2
26-34	Urban	Middle	Not Employed	Employed	Equal number of male and female babies	More than 6 years	26,000 – 50,000	With Spouse’s extended family	9 months	male	C- section	Government hospital	No	Yes	Yes	3	5	5	5	5	5	5	5	5	6	2	1	1	2	3	2	2	1	1	0	1	0	1	1	0	0	0	0	0	0	0	2	0	2
26-34	Urban	High School	Not Employed	Not Employed	More female babies	More than 6 years	26,000 – 50,000	With Spouse’s extended family	9 months	male	C- section	Government hospital	No	Yes	Yes	5	5	5	5	5	5	5	5	6	7	1	2	1	2	2	1	1	1	3	0	1	1	1	0	0	0	0	0	0	0	0	2	1	2
26-34	Urban	Bachelors	Not Employed	Employed	More female babies	More than 6 years	50,000 – 1 lac PKR	Own house	9 months	Female	Simple Vaginal delivery (Normal)	Government hospital	No	No	Yes	5	5	5	5	6	5	7	7	5	7	2	1	2	2	2	2	2	2	2	2	1	1	0	0	0	0	0	1	0	0	0	2	2	2
26-34	Urban	Primary	Not Employed	Employed	More female babies	More than 6 years	25,000 PKR or less	With Spouse’s extended family	9 months	Female	C- section	Government hospital	No	No	Yes	7	5	5	5	5	5	3	3	6	3	2	2	2	2	1	2	2	1	1	0	1	0	0	0	0	0	0	0	0	0	1	3	2	2
26-34	Urban	High School	Employed	Employed	Equal number of male and female babies	More than 6 years	26,000 – 50,000	Own house	9 months	male	C- section	Government hospital	No	No	Yes	5	5	5	5	5	5	6	6	5	7	2	2	2	1	1	3	2	1	2	0	1	1	1	1	1	0	0	0	0	0	0	1	1	2
26-34	Urban	Primary	Not Employed	Employed	More female babies	2 to 6 years	26,000 – 50,000	With Spouse’s extended family	9 months	male	Simple Vaginal delivery (Normal)	Government hospital	Yes	No	Yes	5	5	5	5	5	5	5	5	5	5	0	1	1	2	2	1	2	2	2	2	1	1	0	1	0	0	0	0	0	0	0	3	3	2
35-44	Urban	Bachelors	Not Employed	Employed	More female babies	More than 6 years	26,000 – 50,000	With Spouse’s extended family	9 months	male	Simple Vaginal delivery (Normal)	Government hospital	No	No	Yes	5	5	5	5	5	5	5	5	4	5	1	0	1	3	2	3	3	3	3	0	1	1	0	0	0	0	0	0	0	0	0	1	1	2
26-34	Urban	Primary	Not Employed	Employed	More female babies	More than 6 years	26,000 – 50,000	With Spouse’s extended family	Less than 9 months	Female	C- section	Government hospital	No	No	Yes	5	5	5	5	5	5	5	5	5	5	1	1	2	2	1	2	1	1	2	0	1	0	0	0	0	0	0	0	0	0	0	2	2	2
26-34	Urban	No Formal education	Employed	Not Employed	More female babies	2 to 6 years	26,000 – 50,000	With Spouse’s extended family	9 months	Female	Simple Vaginal delivery (Normal)	Government hospital	Yes	No	Yes	5	6	5	5	5	5	5	5	5	5	3	0	3	2	3	2	2	2	2	0	1	0	0	1	0	0	0	0	0	0	0	2	2	2
26-34	Urban	High School	Employed	Employed	More female babies	More than 6 years	50,000 – 1 lac PKR	Own house	9 months	Female	C- section	Private hospital	Yes	No	Yes	7	7	5	7	4	4	5	4	7	4	1	2	0	3	1	3	1	2	2	1	1	1	0	1	0	1	0	1	0	0	0	0	0	0
35-44	Urban	Bachelors	Employed	Employed	More female babies	More than 6 years	50,000 – 1 lac PKR	Own house	9 months	Female	C- section	Private hospital	No	No	Yes	7	7	5	7	7	7	6	5	7	5	2	2	1	2	1	2	3	3	3	1	1	1	1	1	0	1	0	1	0	0	0	0	0	0
26-34	Urban	Primary	Not Employed	Employed	More female babies	More than 6 years	26,000 – 50,000	Own house	9 months	male	C- section	Government hospital	No	Yes	Yes	5	6	5	6	5	5	5	6	5	3	1	2	1	2	2	1	1	1	2	3	1	1	0	0	0	0	0	0	0	0	0	2	2	2
26-34	Urban	High School	Not Employed	Not Employed	Equal number of male and female babies	2 to 6 years	25,000 PKR or less	With Spouse’s extended family	9 months	Female	C- section	Government hospital	No	Yes	Yes	5	5	4	6	5	1	6	3	5	4	2	1	2	1	2	1	3	1	1	0	1	1	0	0	0	0	0	0	0	0	0	2	2	1
26-34	Urban	High School	Not Employed	Employed	More female babies	2 to 6 years	50,000 – 1 lac PKR	Own house	9 months	male	Simple Vaginal delivery (Normal)	Government hospital	No	Yes	Yes	2	2	2	3	3	3	3	3	5	3	0	0	1	2	1	3	1	2	1	1	1	0	0	1	0	0	0	0	0	0	0	3	2	2
35-44	Urban	Primary	Not Employed	Employed	Equal number of male and female babies	2 to 6 years	26,000 – 50,000	With Spouse’s extended family	9 months	male	Simple Vaginal delivery (Normal)	Government hospital	No	No	Yes	5	5	5	5	5	5	5	5	5	5	0	1	3	2	2	1	2	1	1	2	1	0	0	0	1	0	0	0	0	0	0	2	1	2
26-34	Urban	Primary	Not Employed	Employed	More female babies	More than 6 years	26,000 – 50,000	With Spouse’s extended family	Less than 9 months	Female	C- section	Government hospital	No	Yes	Yes	5	5	5	5	3	3	5	3	6	4	0	0	1	3	2	1	3	2	1	0	1	1	0	0	0	0	0	0	0	0	0	2	0	0
26-34	Urban	High School	Not Employed	Employed	More female babies	More than 6 years	26,000 – 50,000	With Spouse’s extended family	Less than 9 months	Female	C- section	Government hospital	No	No	Yes	5	6	5	6	4	5	5	5	5	5	2	1	2	2	3	2	2	3	3	3	1	1	0	1	0	0	0	0	0	0	0	2	2	2
35-44	Urban	Middle	Not Employed	Employed	More female babies	More than 6 years	26,000 – 50,000	With Spouse’s extended family	Less than 9 months	Female	Simple Vaginal delivery (Normal)	Government hospital	No	Yes	Yes	3	6	5	6	5	5	5	5	5	5	1	1	1	2	0	0	3	3	2	1	1	1	0	1	0	0	0	0	0	0	0	1	1	1
26-34	Urban	High School	Not Employed	Employed	Equal number of male and female babies	More than 6 years	26,000 – 50,000	With Spouse’s extended family	9 months	male	Simple Vaginal delivery (Normal)	Government hospital	No	No	Yes	5	5	5	3	3	5	3	4	5	5	2	1	2	1	1	1	1	2	3	0	1	0	1	0	0	0	0	0	0	0	0	1	2	1
35-44	Urban	Middle	Not Employed	Employed	More female babies	More than 6 years	26,000 – 50,000	With Spouse’s extended family	9 months	Female	C- section	Government hospital	Yes	No	Yes	5	2	5	6	5	1	3	5	5	5	0	0	3	3	1	2	2	2	2	2	1	1	0	0	0	0	0	0	0	0	0	0	0	0
35-44	Urban	High School	Not Employed	Employed	More female babies	More than 6 years	25,000 PKR or less	With Spouse’s extended family	9 months	Female	C- section	Government hospital	Yes	No	Yes	5	5	5	5	5	3	5	5	5	4	0	1	1	3	2	2	2	2	2	2	1	0	0	1	0	0	0	0	0	0	0	3	1	2
26-34	Urban	High School	Not Employed	Not Employed	More female babies	Less than one year	25,000 PKR or less	With Spouse’s extended family	Less than 9 months	Female	C- section	Government hospital	No	Yes	Yes	5	3	3	3	5	5	3	5	3	5	0	0	3	3	3	2	2	2	2	1	1	0	0	0	1	0	0	0	0	0	0	2	1	1
26-34	Urban	Primary	Not Employed	Employed	More female babies	2 to 6 years	26,000 – 50,000	With Spouse’s extended family	Less than 9 months	Female	C- section	Government hospital	No	Yes	Yes	5	3	5	5	5	5	5	5	5	5	0	0	1	2	2	2	2	2	2	0	1	1	0	0	1	0	0	0	0	0	0	2	1	2
26-34	Urban	High School	Not Employed	Employed	More female babies	2 to 6 years	26,000 – 50,000	Own house	9 months	Female	C- section	Government hospital	No	No	Yes	5	3	5	5	5	3	6	5	5	4	1	2	1	1	2	1	1	2	2	2	1	1	1	1	0	0	0	1	0	0	0	0	0	2
26-34	Urban	Primary	Not Employed	Employed	Equal number of male and female babies	2 to 6 years	50,000 – 1 lac PKR	With Spouse’s extended family	Less than 9 months	male	C- section	Government hospital	No	No	Yes	1	2	2	5	2	3	3	5	5	5	2	1	1	2	1	2	2	2	2	2	1	1	0	0	0	0	0	0	0	0	0	3	0	0
26-34	Urban	Bachelors	Employed	Employed	More male babies	2 to 6 years	50,000 – 1 lac PKR	Own house	9 months	male	C- section	Government hospital	Yes	No	Yes	5	5	5	6	5	4	5	5	5	5	1	0	1	3	1	1	2	1	1	1	1	1	1	0	0	0	0	0	0	0	0	2	1	1
16-25	Urban	High School	Not Employed	Employed	More female babies	2 to 6 years	26,000 – 50,000	With Spouse’s extended family	Less than 9 months	male	C- section	Government hospital	No	Yes	Yes	5	6	6	5	5	5	5	5	5	5	2	2	3	2	3	2	3	3	3	3	1	1	1	1	0	0	0	0	0	0	0	3	2	2
35-44	Urban	High School	Not Employed	Employed	More female babies	2 to 6 years	26,000 – 50,000	With Spouse’s extended family	9 months	Female	Simple Vaginal delivery (Normal)	Government hospital	Yes	No	Yes	5	5	5	3	5	5	3	3	3	3	0	1	1	2	3	1	2	2	1	0	1	0	0	0	0	0	0	0	0	0	1	0	0	1
16-25	Urban	High School	Not Employed	Employed	Equal number of male and female babies	2 to 6 years	26,000 – 50,000	With Spouse’s extended family	9 months	male	Simple Vaginal delivery (Normal)	Government hospital	No	Yes	Yes	6	6	5	6	3	3	5	3	6	3	2	1	1	2	1	1	1	1	1	2	1	1	0	0	0	0	0	0	0	0	0	2	2	2
35-44	Urban	High School	Not Employed	Not Employed	More female babies	2 to 6 years	50,000 – 1 lac PKR	With Spouse’s extended family	Less than 9 months	Female	C- section	Government hospital	No	Yes	Yes	3	5	3	5	5	5	5	3	5	3	1	2	2	1	2	1	1	1	2	1	1	0	0	1	1	0	0	0	0	0	0	2	1	2
26-34	Urban	Middle	Not Employed	Not Employed	More female babies	More than 6 years	50,000 – 1 lac PKR	With Spouse’s extended family	9 months	male	Simple Vaginal delivery (Normal)	Government hospital	No	No	Yes	5	5	5	3	3	3	6	6	4	6	2	1	1	2	2	2	1	2	1	2	1	1	1	1	1	0	0	0	0	0	0	2	3	2
26-34	Urban	High School	Not Employed	Not Employed	Equal number of male and female babies	2 to 6 years	26,000 – 50,000	With Spouse’s extended family	Less than 9 months	Female	Simple Vaginal delivery (Normal)	Government hospital	No	No	Yes	5	6	5	5	5	5	5	6	6	5	1	2	2	2	2	1	1	1	2	0	1	1	0	0	1	0	0	0	0	0	0	3	2	0
26-34	Urban	No Formal education	Not Employed	Not Employed	Equal number of male and female babies	More than 6 years	26,000 – 50,000	With Spouse’s extended family	9 months	male	C- section	Government hospital	No	No	Yes	7	7	7	5	5	5	5	4	7	5	2	1	1	1	1	1	2	2	1	2	1	1	1	1	0	0	0	0	0	0	0	1	1	1
16-25	Urban	High School	Not Employed	Employed	More female babies	More than 6 years	26,000 – 50,000	With Spouse’s extended family	9 months	male	C- section	Government hospital	No	Yes	Yes	5	3	3	3	3	5	6	5	6	7	0	0	1	2	0	3	3	2	2	0	1	1	1	0	0	0	0	0	0	0	0	0	0	3
26-34	Urban	High School	Not Employed	Employed	More female babies	More than 6 years	26,000 – 50,000	With Spouse’s extended family	9 months	Female	Simple Vaginal delivery (Normal)	Government hospital	No	No	Yes	4	5	5	5	3	5	5	5	6	6	2	1	1	1	1	1	3	1	1	0	1	1	0	1	0	0	0	0	1	0	0	2	2	0
26-34	Urban	Middle	Employed	Not Employed	Equal number of male and female babies	More than 6 years	26,000 – 50,000	With Spouse’s extended family	Less than 9 months	male	C- section	Government hospital	No	No	Yes	3	5	6	5	5	5	1	3	5	1	0	0	3	2	1	1	2	1	3	0	1	0	0	1	1	0	0	0	0	1	0	1	1	2
16-25	Urban	High School	Not Employed	Employed	More female babies	2 to 6 years	26,000 – 50,000	With Spouse’s extended family	Less than 9 months	Female	Simple Vaginal delivery (Normal)	Private hospital	Yes	No	Yes	5	6	6	6	4	4	6	4	5	4	2	1	1	2	2	1	1	1	1	1	1	1	0	1	1	0	0	0	0	0	0	1	1	2
35-44	Rural	Middle	Not Employed	Employed	More male babies	More than 6 years	50,000 – 1 lac PKR	With Spouse’s extended family	9 months	male	Simple Vaginal delivery (Normal)	Government hospital	No	No	Yes	5	5	5	5	5	5	5	4	5	3	2	1	1	2	2	2	2	2	1	0	1	1	0	0	0	0	0	0	1	1	0	1	0	1
26-34	Urban	High School	Not Employed	Employed	More female babies	More than 6 years	50,000 – 1 lac PKR	Own house	9 months	male	Simple Vaginal delivery (Normal)	Private hospital	Yes	No	Yes	5	5	5	5	5	5	3	5	5	5	2	2	2	1	3	3	2	2	2	2	1	1	0	1	0	1	0	0	0	0	0	0	0	0
16-25	Rural	High School	Not Employed	Employed	More male babies	More than 6 years	26,000 – 50,000	Own house	Less than 9 months	male	Simple Vaginal delivery (Normal)	Government hospital	Yes	No	Yes	2	5	5	3	1	5	1	5	6	5	2	1	1	2	1	1	2	1	1	0	1	1	0	0	0	0	0	0	0	0	0	2	2	2
35-44	Urban	High School	Not Employed	Employed	More female babies	2 to 6 years	26,000 – 50,000	With Spouse’s extended family	9 months	male	C- section	Government hospital	No	Yes	Yes	5	5	4	5	5	5	5	5	5	5	1	2	1	2	2	1	1	2	2	0	1	0	0	1	1	0	0	0	0	0	0	2	1	2
35-44	Urban	High School	Not Employed	Employed	More female babies	2 to 6 years	26,000 – 50,000	With Spouse’s extended family	9 months	male	Simple Vaginal delivery (Normal)	Government hospital	Yes	No	Yes	5	5	5	5	5	5	5	5	5	5	2	1	2	2	2	2	2	3	2	2	1	1	0	0	0	0	0	0	1	0	0	2	1	2
26-34	Rural	High School	Not Employed	Employed	Equal number of male and female babies	2 to 6 years	26,000 – 50,000	With Spouse’s extended family	9 months	male	C- section	Government hospital	Yes	No	Yes	3	5	5	5	6	5	5	6	5	5	1	0	1	0	3	3	2	2	2	0	1	1	0	0	0	0	0	0	0	0	0	3	1	2
35-44	Urban	High School	Not Employed	Not Employed	More male babies	More than 6 years	26,000 – 50,000	With Spouse’s extended family	Less than 9 months	male	Simple Vaginal delivery (Normal)	Government hospital	Yes	No	Yes	1	5	4	2	4	4	5	4	2	1	0	0	1	1	3	3	2	2	3	3	1	1	0	0	0	0	0	0	1	0	0	2	1	2
35-44	Urban	High School	Not Employed	Employed	More male babies	2 to 6 years	26,000 – 50,000	With Spouse’s extended family	Less than 9 months	male	Simple Vaginal delivery (Normal)	Private hospital	Yes	No	Yes	3	5	5	5	5	5	5	5	5	5	2	1	1	1	2	2	2	2	2	0	1	1	0	0	0	0	0	0	0	0	0	2	2	2
16-25	Rural	High School	Not Employed	Employed	Equal number of male and female babies	More than 6 years	50,000 – 1 lac PKR	Own house	9 months	Female	C- section	Government hospital	No	Yes	Yes	4	5	5	4	4	4	4	4	5	4	2	1	1	1	3	3	2	1	1	0	1	0	0	1	0	0	0	0	0	0	0	2	2	1
45+	Rural	Primary	Not Employed	Employed	More female babies	More than 6 years	26,000 – 50,000	With Spouse’s extended family	Less than 9 months	Female	C- section	Government hospital	No	Yes	Yes	3	4	4	3	3	4	3	4	3	4	2	1	2	2	2	1	3	3	1	2	1	1	0	0	0	0	0	0	0	0	0	2	2	2
26-34	Rural	No Formal education	Not Employed	Employed	More female babies	More than 6 years	25,000 PKR or less	With Spouse’s extended family	Less than 9 months	male	C- section	Government hospital	No	No	Yes	3	5	5	5	5	5	5	5	5	5	0	0	1	2	1	2	2	2	2	0	1	1	0	0	0	0	0	0	0	0	0	2	1	1
26-34	Urban	High School	Not Employed	Employed	More male babies	More than 6 years	26,000 – 50,000	Own house	9 months	male	C- section	Government hospital	No	No	Yes	5	5	5	5	5	5	5	5	5	5	0	1	1	3	1	1	2	2	2	2	1	0	0	1	0	0	0	0	0	0	0	0	0	0
26-34	Urban	Primary	Not Employed	Employed	Equal number of male and female babies	2 to 6 years	26,000 – 50,000	Own house	9 months	male	C- section	Government hospital	No	No	Yes	2	6	6	6	2	4	6	4	5	4	2	2	2	2	2	2	2	2	2	0	1	1	0	0	0	0	0	0	0	0	0	2	3	2
26-34	Rural	High School	Not Employed	Employed	More female babies	More than 6 years	26,000 – 50,000	With Spouse’s extended family	9 months	Female	Simple Vaginal delivery (Normal)	Government hospital	Yes	Yes	Yes	4	5	5	5	5	5	5	5	5	5	2	1	2	2	2	2	2	2	2	0	1	1	1	1	0	0	0	0	0	0	1	3	3	2
26-34	Urban	High School	Not Employed	Employed	More female babies	More than 6 years	50,000 – 1 lac PKR	Own house	Less than 9 months	Female	Simple Vaginal delivery (Normal)	Government hospital	No	No	Yes	1	2	6	5	5	5	5	5	2	6	2	1	1	2	2	1	2	2	2	1	1	1	1	1	1	0	0	0	0	0	0	1	2	2
16-25	Urban	High School	Not Employed	Employed	More female babies	More than 6 years	26,000 – 50,000	With Spouse’s extended family	9 months	Female	Simple Vaginal delivery (Normal)	Government hospital	No	Yes	Yes	6	6	6	6	6	6	6	5	5	6	1	1	1	2	2	3	0	0	3	3	1	1	1	0	0	0	0	0	0	0	0	2	3	3
26-34	Urban	High School	Employed	Not Employed	More female babies	More than 6 years	26,000 – 50,000	With Spouse’s extended family	9 months	Female	C- section	Government hospital	No	No	Yes	3	3	5	3	5	5	5	5	5	6	2	1	2	2	2	2	2	1	2	0	1	0	1	0	0	0	0	0	0	0	0	2	1	2
35-44	Rural	High School	Not Employed	Employed	More female babies	More than 6 years	26,000 – 50,000	With Spouse’s extended family	9 months	Female	C- section	Government hospital	No	No	Yes	5	2	5	5	5	5	5	5	5	3	2	1	0	0	2	1	2	2	3	0	1	1	1	0	0	0	0	0	0	0	0	2	1	1
35-44	Urban	Bachelors	Not Employed	Employed	More female babies	More than 6 years	26,000 – 50,000	With Spouse’s extended family	9 months	Female	Simple Vaginal delivery (Normal)	Government hospital	No	Yes	Yes	3	5	5	5	5	5	5	5	5	5	1	1	1	2	2	2	2	1	2	1	1	1	0	0	0	0	0	0	0	0	0	2	1	2
35-44	Rural	Bachelors	Employed	Employed	Equal number of male and female babies	More than 6 years	50,000 – 1 lac PKR	With Spouse’s extended family	9 months	male	Simple Vaginal delivery (Normal)	Government hospital	No	No	Yes	3	6	6	6	6	6	6	6	6	6	0	0	2	2	2	2	1	3	3	0	1	1	0	1	0	0	0	0	0	0	0	2	1	2
35-44	Rural	High School	Not Employed	Employed	More female babies	2 to 6 years	26,000 – 50,000	With Spouse’s extended family	9 months	Female	Simple Vaginal delivery (Normal)	Government hospital	Yes	No	Yes	5	6	6	6	5	5	6	5	5	5	2	1	2	1	2	2	2	2	2	2	1	1	1	0	0	0	0	0	0	0	0	2	3	3
26-34	Urban	High School	Not Employed	Employed	More male babies	More than 6 years	26,000 – 50,000	With Spouse’s extended family	9 months	male	C- section	Government hospital	No	No	Yes	5	5	5	5	5	5	5	5	5	5	2	1	2	2	2	1	2	2	1		1	1	0	0	0	0	0	0	0	0	0	2	1	2
26-34	Urban	High School	Not Employed	Not Employed	More female babies	More than 6 years	50,000 – 1 lac PKR	With Spouse’s extended family	9 months	Female	C- section	Government hospital	No	No	Yes	5	5	6	5	5	6	6	6	6	5	2	1	2	2	2	2	1	2	2	0	1	1	0	0	0	0	0	0	0	0	0	2	2	3
35-44	Rural	High School	Not Employed	Employed	More male babies	More than 6 years	26,000 – 50,000	With Spouse’s extended family	9 months	Female	Simple Vaginal delivery (Normal)	Government hospital	No	Yes	Yes	5	5	3	5	5	5	5	5	5	5	0	0	2	2	2	3	2	2	2	0	1	1	0	0	0	0	0	0	1	0	0	2	1	1
35-44	Urban	High School	Not Employed	Employed	More female babies	2 to 6 years	26,000 – 50,000	With Spouse’s extended family	9 months	Female	C- section	Government hospital	Yes	No	Yes	1	6	5	6	5	5	6	5	6	5	2	2	2	1	2	2	2	3	2	0	1	0	0	0	1	0	0	0	0	0	0	2	1	2
26-34	Urban	High School	Not Employed	Employed	More female babies	2 to 6 years	50,000 – 1 lac PKR	With Spouse’s extended family	9 months	Female	Simple Vaginal delivery (Normal)	Government hospital	Yes	No	Yes	5	5	7	5	5	5	5	5	5	5	2	1	2	2	2	3	3	2	2	0	1	1	0	0	0	0	0	0	0	0	0	1	1	3
26-34	Urban	High School	Not Employed	Employed	Equal number of male and female babies	More than 6 years	25,000 PKR or less	With Spouse’s extended family	Less than 9 months	male	C- section	Government hospital	No	Yes	Yes	4	4	4	4	4	4	4	4	4	4	2	1	2	1	1	3	3	3	1	1	1	0	0	0	0	0	0	0	0	0	1	0	0	3
35-44	Urban	Middle	Not Employed	Employed	More female babies	More than 6 years	26,000 – 50,000	With Spouse’s extended family	Less than 9 months	male	Simple Vaginal delivery (Normal)	Government hospital	No	No	Yes	4	1	2	3	4	5	6	5	2	1	2	2	2	1	1	3	1	2	0	0	1	1	0	1	0	0	0	0	0	0	0	3	3	3
26-34	Urban	High School	Not Employed	Employed	Equal number of male and female babies	More than 6 years	26,000 – 50,000	Own house	Less than 9 months	Female	C- section	Government hospital	No	No	Yes	5	5	5	5	4	5	5	5	5	5	1	2	2	1	2	3	3	2	3	1	1	0	0	0	1	0	0	0	0	0	0	2	2	0
26-34	Urban	High School	Not Employed	Employed	More female babies	2 to 6 years	26,000 – 50,000	With Spouse’s extended family	9 months	Female	C- section	Government hospital	Yes	No	Yes	5	5	5	5	5	5	5	5	3	5	1	2	1	2	2	2	3	2	3	3	1	1	0	0	1	0	0	0	0	0	0	2	2	2
26-34	Urban	High School	Not Employed	Employed	More female babies	More than 6 years	50,000 – 1 lac PKR	Own house	9 months	male	C- section	Government hospital	No	Yes	Yes	6	6	6	6	6	6	6	6	6	6	3	3	2	0	2	3	3	3	0	3	1	1	0	0	0	0	0	0	0	0	0	1	2	1
35-44	Urban	Primary	Not Employed	Employed	More female babies	More than 6 years	26,000 – 50,000	Own house	9 months	Female	Simple Vaginal delivery (Normal)	Government hospital	No	Yes	Yes	5	3	5	6	5	5	5	5	5	5	1	3	2	2	3	3	3	2	2	1	1	1	0	0	0	0	0	0	0	0	0	1	2	2
26-34	Urban	High School	Not Employed	Employed	More female babies	2 to 6 years	26,000 – 50,000	With Spouse’s extended family	9 months	male	Simple Vaginal delivery (Normal)	Government hospital	No	Yes	Yes	3	5	5	5	5	5	6	5	5	5	1	2	2	1	2	2	3	3	3	3	1	1	0	0	0	0	0	0	0	0	0	2	1	2
26-34	Urban	Middle	Not Employed	Not Employed	Equal number of male and female babies	More than 6 years	26,000 – 50,000	With Spouse’s extended family	Less than 9 months	male	Simple Vaginal delivery (Normal)	Government hospital	No	No	Yes	5	5	5	5	5	5	5	5	5	5	2	2	3	1	2	2	1	2	2	2	1	1	1	1	1	0	0	0	0	0	0	2	2	3
35-44	Urban	High School	Not Employed	Employed	Equal number of male and female babies	More than 6 years	26,000 – 50,000	Own house	Less than 9 months	male	Simple Vaginal delivery (Normal)	Government hospital	Yes	No	Yes	5	5	5	5	5	5	5	5	5	6	0	1	2	2	2	2	2	2	2	1	1	1	1	1	1	0	0	0	0	0	0	2	3	3
35-44	Rural	High School	Not Employed	Employed	More female babies	2 to 6 years	26,000 – 50,000	With Spouse’s extended family	9 months	Female	Simple Vaginal delivery (Normal)	Government hospital	No	Yes	Yes	3	3	3	3	4	4	5	4	4	4	2	2	2	2	3	2	2	2	2	2	1	1	0	0	0	0	0	0	0	0	0	3	2	1
26-34	Urban	High School	Not Employed	Employed	More female babies	2 to 6 years	25,000 PKR or less	With Spouse’s extended family	9 months	male	C- section	Government hospital	No	No	Yes	2	5	5	5	5	5	5	5	5	5	2	2	1	1	1	2	3	3	1	0	1	0	0	0	1	0	0	0	0	0	0	0	0	0
26-34	Urban	High School	Not Employed	Employed	More male babies	2 to 6 years	26,000 – 50,000	With Spouse’s extended family	9 months	male	Simple Vaginal delivery (Normal)	Government hospital	Yes	No	Yes	5	6	6	5	4	4	6	4	4	4	2	2	2	2	2	2	2	2	2	2	1	1	0	0	0	0	0	0	0	0	0	2	2	3
26-34	Urban	High School	Not Employed	Employed	More female babies	2 to 6 years	26,000 – 50,000	With Spouse’s extended family	9 months	Female	Simple Vaginal delivery (Normal)	Government hospital	Yes	No	Yes	1	5	5	5	5	5	5	5	5	5	2	2	2	1	2	2	2	2	1	0	1	1	0	0	0	0	0	0	0	0	0	2	2	2
26-34	Urban	High School	Not Employed	Employed	More female babies	2 to 6 years	26,000 – 50,000	With Spouse’s extended family	9 months	Female	C- section	Government hospital	No	No	Yes	2	2	2	3	3	3	3	3	3	3	2	1	1	1	2	1	1	1	2	0	1	1	0	0	0	0	0	0	0	0	0	2	2	1
35-44	Urban	Middle	Not Employed	Not Employed	More male babies	2 to 6 years	26,000 – 50,000	Own house	9 months	male	Simple Vaginal delivery (Normal)	Government hospital	No	No	Yes	5	5	5	5	5	5	5	5	5	5	2	1	2	1	2	2	2	2	1	0	1	0	0	0	0	0	0	0	0	0	1	1	1	1
35-44	Urban	High School	Not Employed	Employed	Equal number of male and female babies	2 to 6 years	26,000 – 50,000	With Spouse’s extended family	9 months	male	Simple Vaginal delivery (Normal)	Government hospital	No	No	Yes	3	5	5	5	5	5	5	5	5	5	2	1	1	2	1	1	1	1	1	1	1	1	0	0	0	0	0	0	0	0	0	2	2	2
35-44	Urban	Primary	Not Employed	Employed	More male babies	More than 6 years	26,000 – 50,000	Own house	9 months	male	C- section	Government hospital	Yes	No	Yes	3	3	3	3	3	3	3	3	3	3	2	3	1	1	2	2	1	1	1	0	1	0	0	0	1	0	0	0	0	0	0	3	3	3
26-34	Urban	High School	Not Employed	Not Employed	More female babies	2 to 6 years	26,000 – 50,000	With Spouse’s extended family	9 months	male	Simple Vaginal delivery (Normal)	Government hospital	Yes	No	Yes	5	5	5	5	5	5	5	5	5	5	1	1	2	2	3	1	2	1	3	1	1	1	0	0	0	0	0	0	0	0	0	3	3	3
35-44	Urban	High School	Not Employed	Employed	More female babies	More than 6 years	26,000 – 50,000	With Spouse’s extended family	9 months	male	Simple Vaginal delivery (Normal)	Government hospital	No	Yes	Yes	5	5	4	5	4	4	5	5	5	4	1	2	3	1	2	2	1	2	0	0	1	0	0	1	0	0	0	0	0	0	0	1	1	1
26-34	Urban	High School	Not Employed	Employed	More male babies	Less than one year	More than 1 lac PKR	Own house	9 months	male	Simple Vaginal delivery (Normal)	Private hospital	Yes	No	Yes	6	6	6	6	5	5	6	5	6	5	2	1	2	2	2	2	2	2	2	0	1	1	0	0	0	0	0	0	0	0	0	2	2	1
35-44	Urban	High School	Not Employed	Employed	More male babies	2 to 6 years	More than 1 lac PKR	Own house	9 months	male	C- section	Private hospital	No	No	Yes	5	5	5	5	5	5	5	5	5	5	2	0	2	2	2	2	2	1	2	2	1	1	0	1	0	0	0	0	0	0	0	2	1	2
35-44	Urban	High School	Not Employed	Employed	More male babies	2 to 6 years	More than 1 lac PKR	Own house	9 months	Female	C- section	Government hospital	No	No	Yes	5	5	5	5	5	5	5	5	5	5	1	1	3	3	3	1	2	2	1	2	1	1	0	0	0	0	0	0	0	0	0	2	1	1
35-44	Urban	High School	Not Employed	Employed	Equal number of male and female babies	More than 6 years	More than 1 lac PKR	Own house	9 months	Female	C- section	Private hospital	No	No	Yes	5	6	6	5	5	5	5	5	5	4	1	1	2	1	2	2	2	3	1	0	1	0	0	1	0	1	0	0	0	0	0	0	0	0
26-34	Urban	High School	Not Employed	Employed	More female babies	2 to 6 years	50,000 – 1 lac PKR	With Spouse’s extended family	9 months	Female	Simple Vaginal delivery (Normal)	Private hospital	Yes	No	Yes	6	5	5	5	5	6	5	5	5	5	2	1	2	2	2	2	2	2	1	0	1	0	0	0	1	0	0	0	0	0	0	2	3	3
26-34	Urban	Bachelors	Employed	Employed	Equal number of male and female babies	More than 6 years	50,000 – 1 lac PKR	With Spouse’s extended family	9 months	Female	C- section	Government hospital	No	Yes	Yes	3	3	5	3	3	3	5	3	3	3	2	1	3	2	2	2	2	1	1	0	1	1	0	0	0	0	0	0	0	0	0	2	2	2
35-44	Urban	High School	Not Employed	Employed	More male babies	2 to 6 years	26,000 – 50,000	With Spouse’s extended family	9 months	male	Simple Vaginal delivery (Normal)	Government hospital	No	No	Yes	3	3	3	3	3	3	3	3	3	3	1	2	2	2	2	2	1	1	2	2	1	1	0	0	0	0	0	0	0	0	0	0	0	0
35-44	Urban	Middle	Not Employed	Employed	Equal number of male and female babies	More than 6 years	26,000 – 50,000	Own house	9 months	Female	Simple Vaginal delivery (Normal)	Government hospital	No	No	Yes	5	5	5	5	5	5	5	5	5	5	2	1	2	2	2	2	2	2	1	0	1	1	0	0	0	0	0	0	0	0	0	2	0	2
45+	Urban	Primary	Employed	Not Employed	More male babies	2 to 6 years	26,000 – 50,000	Own house	9 months	male	Simple Vaginal delivery (Normal)	Government hospital	No	No	Yes	5	5	3	3	3	3	3	3	3	3	2	1	2	1	2	2	1	2	3	3	1	1	0	0	1	0	0	0	1	0	0	2	3	3
35-44	Urban	No Formal education	Not Employed	Not Employed	More female babies	More than 6 years	50,000 – 1 lac PKR	With Spouse’s extended family	9 months	Female	C- section	Government hospital	No	No	Yes	3	5	5	5	5	1	2	3	7	4	2	1	2	1	2	3	1	2	2	2	1	0	0	0	0	0	0	0	0	1	1	2	1	2
35-44	Urban	High School	Not Employed	Employed	Equal number of male and female babies	More than 6 years	50,000 – 1 lac PKR	Own house	9 months	Female	Simple Vaginal delivery (Normal)	Private hospital	No	Yes	Yes	3	5	5	5	5	5	5	5	5	5	0	1	3	1	1	2	2	2	1	0	1	0	0	1	0	0	1	0	0	0	0	2	1	1
35-44	Urban	High School	Not Employed	Employed	More female babies	2 to 6 years	26,000 – 50,000	With Spouse’s extended family	Less than 9 months	Female	Simple Vaginal delivery (Normal)	Private hospital	Yes	No	Yes	3	3	3	3	3	3	3	3	3	3	1	1	1	2	2	1	2	1	1	1	1	0	0	0	1	0	0	0	0	0	0	2	3	3
26-34	Urban	High School	Not Employed	Employed	Equal number of male and female babies	More than 6 years	50,000 – 1 lac PKR	With Spouse’s extended family	Less than 9 months	Female	Simple Vaginal delivery (Normal)	Private hospital	No	No	Yes	1	1	3	5	7	7	1	6	4	7	2	1	2	2	2	2	2	2	2	0	1	0	1	0	0	0	0	0	0	0	0	3	3	3
26-34	Urban	No Formal education	Not Employed	Employed	Equal number of male and female babies	More than 6 years	26,000 – 50,000	With Spouse’s extended family	9 months	Female	C- section	Government hospital	No	No	Yes	5	5	3	5	5	5	5	5	5	5	2	1	2	2	2	2	2	3	2	3	1	1	1	0	0	0	0	0	0	0	0	2	2	1
26-34	Urban	No Formal education	Not Employed	Employed	More male babies	More than 6 years	26,000 – 50,000	Own house	9 months	male	C- section	Government hospital	No	No	Yes	2	5	5	5	5	5	5	5	5	5	2	1	2	1	2	2	2	2	2	2	1	1	0	0	0	0	0	0	0	0	1	0	0	0
35-44	Urban	Middle	Not Employed	Employed	Equal number of male and female babies	More than 6 years	26,000 – 50,000	With Spouse’s extended family	9 months	male	C- section	Government hospital	No	No	Yes	2	6	2	6	4	4	4	4	5	4	3	3	2	3	2	3	3	3	3	0	1	0	0	1	0	0	0	0	0	0	0	0	3	3
35-44	Urban	Primary	Not Employed	Not Employed	More female babies	More than 6 years	25,000 PKR or less	With Spouse’s extended family	9 months	male	Simple Vaginal delivery (Normal)	Government hospital	No	No	Yes	5	5	5	5	5	5	5	5	5	5	2	1	0	2	2	3	3	2	2	0	1	1	0	0	0	0	0	0	0	0	0	3	0	3
35-44	Urban	No Formal education	Not Employed	Employed	More female babies	More than 6 years	26,000 – 50,000	With Spouse’s extended family	9 months	Female	Simple Vaginal delivery (Normal)	Government hospital	No	No	Yes	5	5	5	5	5	5	5	5	5	5	1	2	3	2	2	2	2	2	2	2	1	0	1	1	0	0	0	0	0	0	0	3	2	3
26-34	Urban	High School	Not Employed	Not Employed	More female babies	2 to 6 years	25,000 PKR or less	With Spouse’s extended family	9 months	Female	Simple Vaginal delivery (Normal)	Government hospital	No	Yes	Yes	3	5	3	3	4	4	4	4	4	4	2	1	3	2	2	1	1	2	1	2	1	0	0	0	1	0	0	0	0	0	0	3	2	3
35-44	Urban	High School	Not Employed	Employed	More male babies	More than 6 years	50,000 – 1 lac PKR	With Spouse’s extended family	9 months	male	C- section	Government hospital	No	No	Yes	5	5	5	6	5	5	6	5	6	5	1	2	2	2	2	2	3	3	1	3	1	1	0	0	0	0	0	0	0	0	0	3	3	3
35-44	Urban	High School	Not Employed	Employed	More female babies	More than 6 years	50,000 – 1 lac PKR	With Spouse’s extended family	9 months	male	Simple Vaginal delivery (Normal)	Government hospital	No	Yes	Yes	3	3	5	5	3	3	5	3	3	3	2	1	3	2	3	2	3	3	2	0	1	1	0	1	1	0	0	0	0	0	0	2	2	2
26-34	Urban	High School	Not Employed	Employed	More female babies	More than 6 years	26,000 – 50,000	With Spouse’s extended family	9 months	male	C- section	Government hospital	No	No	Yes	3	6	6	6	4	4	5	5	5	4	1	2	2	2	2	2	2	2	2	2	1	1	0	0	0	0	0	0	0	0	0	2	2	2
35-44	Urban	Middle	Not Employed	Employed	Equal number of male and female babies	More than 6 years	26,000 – 50,000	With Spouse’s extended family	9 months	male	C- section	Government hospital	No	No	Yes	5	5	5	5	5	5	5	5	5	5	2	2	2	2	2	3	2	3	2	0	1	1	0	0	0	0	0	0	0	0	0	0	0	0
35-44	Urban	Primary	Not Employed	Employed	More female babies	More than 6 years	26,000 – 50,000	With Spouse’s extended family	9 months	Female	Simple Vaginal delivery (Normal)	Government hospital	No	No	Yes	1	6	5	6	5	5	6	5	6	5	1	1	2	2	2	2	2	2	2	2	1	0	0	1	1	0	0	0	0	0	0	2	2	0
35-44	Urban	High School	Not Employed	Employed	Equal number of male and female babies	More than 6 years	50,000 – 1 lac PKR	With Spouse’s extended family	9 months	Female	Simple Vaginal delivery (Normal)	Government hospital	No	No	Yes	5	5	5	5	5	5	4	5	5	4	2	1	1	1	3	3	3	3	2	2	1	1	0	0	0	0	0	0	0	0	0	3	3	3
26-34	Urban	Primary	Not Employed	Employed	Equal number of male and female babies	More than 6 years	26,000 – 50,000	With Spouse’s extended family	9 months	Female	C- section	Government hospital	No	No	Yes	5	5	5	5	5	5	5	5	5	5	2	2	2	2	2	2	2	2	2	2	1	1	0	1	0	0	0	0	0	0	0	2	2	2
35-44	Urban	No Formal education	Not Employed	Employed	More female babies	More than 6 years	26,000 – 50,000	With Spouse’s extended family	9 months	Female	C- section	Government hospital	No	No	Yes	5	5	5	5	5	5	5	5	5	5	2	2	2	2	2	2	3	2	1	1	1	1	0	0	0	0	0	0	0	0	0	2	2	2
35-44	Urban	Primary	Not Employed	Employed	More female babies	More than 6 years	50,000 – 1 lac PKR	With Spouse’s extended family	9 months	male	C- section	Government hospital	No	No	Yes	5	5	5	5	5	5	5	5	5	5	2	1	2	2	2	1	2	2	3	1	1	1	0	0	0	0	0	0	0	0	1	2	2	2
35-44	Urban	Primary	Not Employed	Employed	More female babies	More than 6 years	50,000 – 1 lac PKR	With Spouse’s extended family	9 months	Female	C- section	Government hospital	No	No	Yes	6	6	6	6	6	6	6	6	6	6	2	3	2	3	2	3	2	3	2	0	1	1	0	0	0	0	0	0	0	0	0	1	1	1
35-44	Urban	Bachelors	Employed	Employed	More female babies	More than 6 years	50,000 – 1 lac PKR	Own house	9 months	Female	C- section	Government hospital	No	No	Yes	5	5	5	5	5	5	5	5	5	5	2	2	2	2	1	2	2	2	2	2	1	1	1	0	0	0	0	0	0	0	0	3	3	3
16-25	Urban	Bachelors	Employed	Employed	More female babies	2 to 6 years	50,000 – 1 lac PKR	Own house	9 months	Female	C- section	Government hospital	No	No	Yes	5	5	5	5	5	5	5	5	5	5	2	2	2	1	2	2	2	1	2	1	1	1	0	0	0	0	0	0	0	0	0	3	3	0
16-25	Urban	High School	Not Employed	Employed	More male babies	2 to 6 years	50,000 – 1 lac PKR	With Spouse’s extended family	9 months	male	C- section	Government hospital	Yes	No	Yes	3	5	5	5	4	4	5	4	5	4	2	1	3	2	2	2	2	2	1	0	1	1	0	1	1	0	0	0	0	0	0	2	2	0
16-25	Urban	High School	Not Employed	Employed	More male babies	2 to 6 years	50,000 – 1 lac PKR	With Spouse’s extended family	9 months	male	C- section	Government hospital	Yes	No	Yes	3	5	5	5	4	4	5	4	5	4	2	2	1	2	1	1	2	2	1	1	1	1	0	1	1	0	0	0	0	0	0	2	2	2
35-44	Urban	High School	Not Employed	Employed	Equal number of male and female babies	More than 6 years	26,000 – 50,000	With Spouse’s extended family	9 months	Female	Simple Vaginal delivery (Normal)	Government hospital	No	No	Yes	5	5	6	5	5	5	5	5	5	5	2	1	2	2	2	2	1	3	2	0	1	0	0	1	0	0	0	0	0	0	0	3	3	2
35-44	Urban	High School	Not Employed	Employed	More male babies	More than 6 years	26,000 – 50,000	With Spouse’s extended family	Less than 9 months	male	C- section	Government hospital	No	No	Yes	1	6	6	6	6	6	6	6	6	5	2	1	3	1	2	1	1	2	2	0	1	1	0	0	0	0	0	0	1	0	0	3	3	3
35-44	Urban	Primary	Not Employed	Employed	More female babies	More than 6 years	26,000 – 50,000	With Spouse’s extended family	9 months	Female	C- section	Government hospital	No	Yes	Yes	5	6	5	5	5	5	5	5	5	5	2	1	1	2	3	2	2	2	2	0	1	0	0	0	1	0	0	0	0	0	0	2	2	2
35-44	Urban	No Formal education	Not Employed	Employed	Equal number of male and female babies	More than 6 years	26,000 – 50,000	With Spouse’s extended family	Less than 9 months	male	C- section	Government hospital	No	No	Yes	5	5	5	5	5	5	5	5	5	5	0	0	3	3	2	2	2	3	2	0	1	1	0	0	0	0	0	0	0	0	0	0	0	0
26-34	Urban	High School	Not Employed	Employed	Equal number of male and female babies	More than 6 years	25,000 PKR or less	With Spouse’s extended family	9 months	Female	C- section	Government hospital	No	No	Yes	3	5	5	5	3	3	5	3	7	3	2	2	2	1	3	2	2	1	3	1	1	0	0	1	0	0	0	0	0	0	0	3	3	3
35-44	Urban	High School	Not Employed	Not Employed	More female babies	More than 6 years	26,000 – 50,000	With Spouse’s extended family	9 months	Female	Simple Vaginal delivery (Normal)	Government hospital	No	No	Yes	5	5	5	5	5	5	5	5	5	5	2	2	2	1	2	3	1	3	3	1	1	0	0	1	0	0	0	0	0	0	0	3	2	2
26-34	Urban	High School	Not Employed	Employed	Equal number of male and female babies	More than 6 years	26,000 – 50,000	With Spouse’s extended family	9 months	Female	C- section	Government hospital	No	No	Yes	5	5	5	5	5	5	5	5	5	5	1	2	2	2	1	2	2	2	1	2	1	0	0	0	0	0	0	0	0	0	0	2	0	2
16-25	Urban	Middle	Not Employed	Not Employed	Equal number of male and female babies	2 to 6 years	26,000 – 50,000	Own house	9 months	male	C- section	Government hospital	No	No	Yes	5	5	5	5	5	5	5	5	5	5	2	1	2	2	1	1	3	3	1	0	1	0	0	0	0	0	0	0	0	0	0	2	2	2
16-25	Urban	High School	Not Employed	Not Employed	More male babies	2 to 6 years	25,000 PKR or less	With Spouse’s extended family	9 months	male	C- section	Government hospital	No	No	Yes	3	3	3	5	3	3	3	3	3	3	2	1	1	2	2	1	3	2	1	0	1	1	0	1	0	0	0	0	0	0	0	1	1	1
35-44	Urban	High School	Not Employed	Employed	Equal number of male and female babies	More than 6 years	26,000 – 50,000	With Spouse’s extended family	9 months	male	C- section	Government hospital	No	No	Yes	5	5	5	5	5	5	5	5	5	5	2	1	3	2	2	1	2	2	2	0	1	0	0	0	0	0	0	0	0	0	0	2	2	2
16-25	Urban	High School	Not Employed	Employed	Equal number of male and female babies	More than 6 years	26,000 – 50,000	With Spouse’s extended family	9 months	Female	C- section	Government hospital	No	No	Yes	5	5	5	5	3	5	5	5	5	5	0	0	1	1	3	0	2	2	2	2	1	1	1	0	0	0	0	0	0	0	0	2	2	2
26-34	Urban	High School	Not Employed	Employed	More female babies	More than 6 years	26,000 – 50,000	Own house	9 months	male	C- section	Government hospital	No	No	Yes	5	5	5	5	5	5	5	5	5	5	2	1	2	2	2	2	2	3	1	0	1	0	1	0	0	0	0	0	0	0	0	0	2	2
16-25	Urban	High School	Not Employed	Employed	More female babies	2 to 6 years	25,000 PKR or less	With Spouse’s extended family	9 months	Female	Simple Vaginal delivery (Normal)	Government hospital	Yes	No	Yes	3	5	5	5	5	5	5	5	5	5	2	1	2	1	1	2	1	1	1	0	1	1	0	0	0	0	0	0	0	0	0	2	2	2
26-34	Urban	High School	Not Employed	Employed	Equal number of male and female babies	More than 6 years	26,000 – 50,000	With Spouse’s extended family	9 months	Female	C- section	Government hospital	No	No	Yes	6	6	5	5	5	5	5	5	5	5	2	1	2	2	1	2	3	2	1	0	1	0	0	1	0	0	0	0	0	0	0	2	2	2
35-44	Urban	No Formal education	Not Employed	Employed	More female babies	More than 6 years	26,000 – 50,000	With Spouse’s extended family	9 months	Female	C- section	Government hospital	No	No	Yes	3	5	5	5	3	3	5	3	5	3	2	2	2	2	1	3	3	3	3	0	1	1	0	0	0	0	0	0	0	0	0	2	1	1
16-25	Rural	High School	Not Employed	Employed	More female babies	2 to 6 years	26,000 – 50,000	With Spouse’s extended family	9 months	male	C- section	Government hospital	No	No	Yes	5	5	5	3	5	4	6	4	4	4	1	2	1	1	2	0	0	3	3	1	1	0	0	0	1	0	0	0	0	0	0	1	1	1
16-25	Urban	High School	Not Employed	Employed	More male babies	2 to 6 years	26,000 – 50,000	With Spouse’s extended family	9 months	male	C- section	Government hospital	No	No	Yes	6	6	5	6	5	5	5	6	6	3	0	0	2	1	2	1	3	1	2	0	1	1	0	0	0	0	0	0	0	0	0	3	3	3
35-44	Urban	High School	Not Employed	Employed	More male babies	More than 6 years	26,000 – 50,000	With Spouse’s extended family	9 months	male	C- section	Government hospital	No	No	Yes	5	5	5	5	5	5	5	5	5	5	0	1	2	2	1	3	1	1	1	0	1	1	0	0	0	0	0	0	0	0	0	1	1	2
26-34	Urban	High School	Not Employed	Employed	More female babies	2 to 6 years	26,000 – 50,000	With Spouse’s extended family	9 months	Female	C- section	Government hospital	No	No	Yes	6	6	6	6	2	2	6	3	5	3	1	2	1	1	2	1	1	1	2	0	1	0	0	0	0	0	0	0	0	0	0	2	3	3
26-34	Urban	High School	Not Employed	Employed	More male babies	2 to 6 years	25,000 PKR or less	With Spouse’s extended family	9 months	Female	Simple Vaginal delivery (Normal)	Government hospital	No	No	Yes	4	5	5	5	5	5	5	5	6	6	2	1	1	1	1	2	2	2	2	0	1	1	0	0	0	0	0	0	0	0	0	2	1	1
16-25	Urban	Bachelors	Not Employed	Employed	More male babies	2 to 6 years	26,000 – 50,000	With Spouse’s extended family	9 months	male	C- section	Government hospital	Yes	No	Yes	4	5	5	5	5	5	3	4	5	4	1	1	3	2	2	2	1	2	2	0	1	0	0	1	0	0	0	0	0	0	0	2	0	2
26-34	Urban	Primary	Not Employed	Employed	Equal number of male and female babies	More than 6 years	25,000 PKR or less	With Spouse’s extended family	9 months	male	C- section	Government hospital	No	No	Yes	5	5	5	5	5	5	5	5	5	5	2	1	1	2	2	1	2	3	3	3	1	1	1	0	0	0	0	0	0	0	0	2	2	2
35-44	Urban	No Formal education	Not Employed	Employed	More female babies	More than 6 years	26,000 – 50,000	Own house	9 months	Female	C- section	Government hospital	No	No	Yes	3	3	5	3	5	5	5	5	5	3	2	1	3	1	2	2	1	3	3	2	1	0	0	1	0	0	0	0	0	0	0	0	0	0
26-34	Urban	No Formal education	Not Employed	Employed	More female babies	2 to 6 years	26,000 – 50,000	Own house	9 months	Female	C- section	Government hospital	No	No	Yes	3	5	5	3	5	6	6	6	6	4	1	2	2	2	3	2	3	1	2	0	1	1	0	0	0	0	0	0	0	0	0	1	1	1
26-34	Urban	Primary	Not Employed	Employed	More male babies	More than 6 years	25,000 PKR or less	Own house	9 months	male	C- section	Government hospital	No	No	Yes	3	3	5	3	5	5	5	5	3	5	1	1	2	1	2	1	1	2	2	1	1	0	1	1	0	0	0	0	0	0	0	2	2	2
26-34	Urban	High School	Not Employed	Employed	More female babies	More than 6 years	25,000 PKR or less	With Spouse’s extended family	9 months	male	C- section	Government hospital	No	No	Yes	3	3	3	3	4	4	5	4	3	4	2	1	2	2	1	2	2	3	1	0	1	0	0	0	0	0	0	0	0	0	1	0	0	0
35-44	Urban	High School	Not Employed	Employed	Equal number of male and female babies	2 to 6 years	26,000 – 50,000	With Spouse’s extended family	9 months	Female	Simple Vaginal delivery (Normal)	Government hospital	No	No	Yes	5	5	5	5	5	5	3	3	5	3	1	2	3	1	2	0	3	2	1	0	1	0	0	0	0	0	0	0	0	0	0	2	0	0
35-44	Urban	No Formal education	Not Employed	Employed	More male babies	More than 6 years	25,000 PKR or less	Own house	9 months	male	C- section	Government hospital	No	No	Yes	2	2	5	2	5	4	5	4	4	4	2	1	2	2	2	2	2	1	2	0	1	1	0	0	0	0	0	0	0	0	0	2	1	2
26-34	Urban	Middle	Not Employed	Employed	More female babies	2 to 6 years	26,000 – 50,000	With Spouse’s extended family	9 months	male	C- section	Government hospital	No	No	Yes	6	6	5	6	5	5	5	6	6	5	2	1	2	2	3	1	3	2	2	0	1	1	0	1	0	0	0	0	0	0	0	0	0	1
16-25	Urban	Middle	Not Employed	Not Employed	More male babies	2 to 6 years	25,000 PKR or less	Own house	9 months	male	C- section	Government hospital	Yes	No	Yes	5	5	4	5	5	5	6	5	5	5	2	2	2	1	2	1	1	2	1	0	1	1	1	1	0	0	0	0	0	0	0	2	0	0
26-34	Urban	Primary	Not Employed	Not Employed	More female babies	More than 6 years	25,000 PKR or less	Own house	9 months	male	C- section	Government hospital	No	No	Yes	4	4	5	6	4	5	5	5	5	5	2	1	1	1	2	0	1	1	3	0	1	1	0	0	0	0	0	0	0	0	1	0	0	0
26-34	Urban	Middle	Not Employed	Not Employed	More female babies	More than 6 years	25,000 PKR or less	With Spouse’s extended family	9 months	male	C- section	Government hospital	No	No	Yes	5	5	5	5	5	5	5	5	5	5	0	1	3	3	2	2	2	2	2	0	1	0	0	0	1	0	0	0	0	0	0	2	0	2
35-44	Urban	High School	Not Employed	Employed	More female babies	2 to 6 years	26,000 – 50,000	Own house	9 months	male	C- section	Government hospital	No	No	Yes	5	6	5	6	5	5	5	5	6	5	2	1	1	1	1	1	2	2	1	0	1	0	0	1	0	0	0	0	0	0	0	0	0	0
26-34	Urban	Bachelors	Employed	Not Employed	More female babies	More than 6 years	25,000 PKR or less	With Spouse’s extended family	Less than 9 months	Female	C- section	Private hospital	No	Yes	Yes	5	6	6	6	5	5	6	5	6	5	0	1	1	2	2	1	2	1	2	1	1	1	0	0	0	0	0	0	0	0	0	1	1	1
35-44	Urban	Primary	Not Employed	Employed	More male babies	More than 6 years	26,000 – 50,000	With Spouse’s extended family	9 months	male	C- section	Private hospital	No	No	Yes	5	5	3	5	5	5	5	5	5	5	2	1	1	1	2	1	2	2	2	0	1	1	0	0	0	0	0	0	0	0	0	2	0	0
35-44	Urban	Middle	Not Employed	Employed	More male babies	More than 6 years	26,000 – 50,000	With Spouse’s extended family	9 months	male	C- section	Government hospital	No	No	Yes	5	2	5	5	5	5	5	5	5	5	0	2	1	2	2	1	1	2	1	2	1	1	0	1	0	0	0	0	0	0	0	0	0	0
16-25	Urban	Bachelors	Not Employed	Employed	More female babies	2 to 6 years	26,000 – 50,000	With Spouse’s extended family	9 months	Female	C- section	Private hospital	Yes	No	Yes	1	6	6	6	6	6	6	5	6	5	0	0	3	2	2	2	2	2	2	2	1	1	1	1	0	0	0	0	0	0	0	3	2	3
26-34	Urban	High School	Not Employed	Employed	Equal number of male and female babies	2 to 6 years	25,000 PKR or less	With Spouse’s extended family	9 months	Female	C- section	Private hospital	No	No	Yes	5	6	6	6	6	6	6	6	6	6	2	1	1	2	2	0	2	0	0	2	1	0	0	1	1	0	0	0	0	0	0	2	1	1
35-44	Urban	Primary	Not Employed	Employed	More female babies	2 to 6 years	25,000 PKR or less	With Spouse’s extended family	9 months	Female	C- section	Private hospital	No	No	Yes	5	6	6	6	6	6	6	6	6	6	2	2	1	0	2	1	2	2	1	1	1	1	0	0	0	0	0	0	0	0	0	1	1	1
26-34	Urban	High School	Not Employed	Employed	More male babies	More than 6 years	26,000 – 50,000	Own house	9 months	male	C- section	Private hospital	No	No	Yes	5	6	5	5	5	5	5	5	5	5	0	2	2	2	2	0	2	2	2	2	1	0	0	0	0	0	0	0	0	0	1	3	3	3
35-44	Urban	Bachelors	Not Employed	Not Employed	More female babies	More than 6 years	50,000 – 1 lac PKR	Own house	9 months	Female	C- section	Private hospital	No	No	Yes	5	5	6	5	6	5	5	5	5	5	1	1	2	0	2	1	3	2	1	1	1	1	1	0	0	0	0	0	0	0	0	1	1	1
26-34	Urban	High School	Not Employed	Employed	More female babies	More than 6 years	26,000 – 50,000	Own house	9 months	Female	C- section	Private hospital	No	No	Yes	5	5	6	5	6	6	6	6	6	6	1	2	2	2	2	1	1	2	1	2	1	1	0	1	0	0	0	0	0	0	0	2	2	2
35-44	Urban	No Formal education	Not Employed	Employed	More female babies	More than 6 years	26,000 – 50,000	With Spouse’s extended family	9 months	Female	C- section	Private hospital	No	No	Yes	1	5	6	6	5	5	6	6	5	6	3	2	1	2	3	1	1	2	1	2	1	1	0	1	0	0	0	1	0	0	0	0	0	0
26-34	Urban	High School	Not Employed	Employed	More female babies	More than 6 years	26,000 – 50,000	With Spouse’s extended family	9 months	Female	C- section	Private hospital	No	No	Yes	5	5	7	5	5	5	6	3	5	5	2	1	2	1	2	2	2	1	2	1	1	1	0	0	0	0	0	1	0	0	0	0	2	3
26-34	Urban	Primary	Not Employed	Employed	Equal number of male and female babies	More than 6 years	26,000 – 50,000	With Spouse’s extended family	9 months	male	C- section	Private hospital	No	No	Yes	5	5	6	5	5	3	6	5	5	3	2	1	2	3	1	1	2	2	1	1	1	1	0	0	0	0	0	0	0	0	0	0	2	0
16-25	Urban	Middle	Not Employed	Employed	More male babies	2 to 6 years	25,000 PKR or less	With Spouse’s extended family	9 months	male	C- section	Private hospital	Yes	No	Yes	7	5	6	6	6	6	6	6	5	5	1	3	1	1	1	1	2	2	2	0	1	0	0	1	1	0	0	0	0	0	1	2	1	2
26-34	Urban	Primary	Not Employed	Employed	Equal number of male and female babies	More than 6 years	50,000 – 1 lac PKR	With Spouse’s extended family	9 months	Female	C- section	Government hospital	No	Yes	Yes	3	6	5	5	5	5	6	6	6	5	2	1	1	2	2	1	2	2	1	2	1	0	0	1	0	1	0	0	0	0	0	0	0	0
16-25	Urban	Bachelors	Not Employed	Employed	More female babies	2 to 6 years	26,000 – 50,000	Own house	9 months	male	C- section	Private hospital	No	No	Yes	5	5	5	5	6	6	5	6	6	5	2	1	3	2	2	1	2	1	3	1	1	1	1	0	0	0	0	0	0	0	0	0	0	0
26-34	Urban	Masters or higher	Employed	Employed	More female babies	2 to 6 years	26,000 – 50,000	Own house	9 months	Female	C- section	Private hospital	No	No	Yes	6	6	5	5	3	3	5	3	5	3	2	1	1	1	2	1	2	1	2	1	1	0	0	0	0	1	0	0	0	0	0	0	2	0
26-34	Urban	No Formal education	Not Employed	Employed	Equal number of male and female babies	More than 6 years	26,000 – 50,000	With Spouse’s extended family	9 months	male	C- section	Private hospital	No	No	Yes	3	5	5	5	5	4	5	4	5	4	2	1	1	2	1	1	2	1	1	0	1	1	0	0	0	0	0	0	0	0	0	3	2	3
35-44	Urban	Primary	Not Employed	Employed	Equal number of male and female babies	2 to 6 years	26,000 – 50,000	With Spouse’s extended family	9 months	Female	Simple Vaginal delivery (Normal)	Government hospital	No	No	Yes	5	5	5	5	4	4	3	4	4	4	2	1	2	2	2	1	1	2	2	1	1	1	0	0	0	0	0	0	0	0	0	2	1	0
26-34	Urban	Bachelors	Not Employed	Employed	More male babies	More than 6 years	26,000 – 50,000	With Spouse’s extended family	9 months	Female	C- section	Government hospital	No	Yes	Yes	5	5	5	5	5	5	5	5	5	7	1	2	1	1	2	2	1	1	1	1	1	1	1	0	0	0	0	0	0	0	0	2	3	3
16-25	Urban	No Formal education	Not Employed	Employed	More male babies	More than 6 years	26,000 – 50,000	Own house	9 months	male	C- section	Private hospital	Yes	No	Yes	5	6	6	5	6	5	6	6	5	5	1	2	2	2	2	1	0	1	2	2	1	1	0	0	0	0	0	0	0	0	0	0	0	0
26-34	Urban	No Formal education	Not Employed	Not Employed	Equal number of male and female babies	More than 6 years	26,000 – 50,000	With Spouse’s extended family	9 months	Female	C- section	Private hospital	No	No	Yes	5	5	5	5	5	5	5	5	5	5	2	1	3	1	0	2	2	1	2	0	1	0	0	0	1	0	0	0	0	0	0	2	2	2
16-25	Urban	Masters or higher	Employed	Employed	More female babies	2 to 6 years	26,000 – 50,000	Own house	Less than 9 months	Female	C- section	Private hospital	Yes	Yes	Yes	6	6	5	6	5	5	5	5	6	5	2	1	2	2	2	2	1	2	2	2	1	1	0	0	0	0	0	0	0	0	0	2	1	2
16-25	Urban	High School	Not Employed	Employed	More female babies	More than 6 years	26,000 – 50,000	With Spouse’s extended family	9 months	Female	C- section	Private hospital	No	No	Yes	5	5	6	5	5	6	5	3	5	3	2	1	2	2	1	1	2	1	3	1	1	1	0	0	0	0	0	1	0	0	0	0	2	0
16-25	Urban	Bachelors	Employed	Employed	More male babies	Less than one year	26,000 – 50,000	Own house	Less than 9 months	male	C- section	Private hospital	Yes	No	Yes	3	4	5	5	4	5	5	4	5	4	2	1	1	2	3	0	2	2	1	0	1	0	0	1	0	0	0	0	0	0	1	0	0	3
26-34	Urban	Primary	Employed	Not Employed	More female babies	More than 6 years	50,000 – 1 lac PKR	Own house	Less than 9 months	Female	C- section	Private hospital	No	No	Yes	5	5	6	5	5	3	5	3	5	3	1	2	1	2	1	3	1	2	2	0	1	1	0	0	1	0	0	1	0	0	0	1	3	2
35-44	Urban	Bachelors	Not Employed	Employed	Equal number of male and female babies	More than 6 years	26,000 – 50,000	Own house	9 months	male	C- section	Private hospital	No	No	Yes	2	5	6	5	5	5	5	5	5	5	2	1	0	3	0	2	3	3	2	2	1	1	1	1	1	0	0	1	0	0	0	0	0	0
35-44	Urban	High School	Not Employed	Employed	More female babies	More than 6 years	26,000 – 50,000	With Spouse’s extended family	9 months	Female	C- section	Private hospital	No	No	Yes	5	5	5	5	5	5	3	5	5	5	2	1	3	3	1	1	3	2	3	3	1	1	1	0	0	0	0	0	0	0	0	3	3	2
26-34	Urban	High School	Not Employed	Employed	Equal number of male and female babies	More than 6 years	26,000 – 50,000	With Spouse’s extended family	9 months	male	C- section	Private hospital	No	No	Yes	5	5	5	5	5	3	5	5	5	5	2	1	3	3	1	1	2	2	1	0	1	1	0	0	0	0	0	1	1	0	0	2	3	2
35-44	Urban	High School	Not Employed	Employed	More female babies	More than 6 years	50,000 – 1 lac PKR	Own house	Less than 9 months	Female	C- section	Private hospital	No	Yes	Yes	5	5	6	7	5	5	5	5	5	5	2	1	3	2	2	3	0	0	3	1	1	0	0	1	1	0	0	1	0	0	0	0	0	0
26-34	Urban	Primary	Not Employed	Employed	More female babies	More than 6 years	50,000 – 1 lac PKR	Own house	Less than 9 months	male	C- section	Private hospital	No	No	Yes	5	5	5	5	5	3	5	3	5	3	2	1	3	2	2	2	1	1	1	2	1	1	0	0	0	0	0	1	1	0	0	1	2	3
26-34	Urban	High School	Not Employed	Employed	More female babies	More than 6 years	26,000 – 50,000	Own house	9 months	Female	C- section	Private hospital	No	No	Yes	1	3	4	3	3	3	3	3	3	3	1	2	2	2	2	1	2	1	2	1	1	0	0	0	0	0	0	0	0	0	1	0	0	0
26-34	Urban	High School	Not Employed	Employed	More female babies	More than 6 years	26,000 – 50,000	With Spouse’s extended family	9 months	Female	C- section	Private hospital	No	No	Yes	6	6	6	6	5	5	5	5	6	5	3	3	3	1	2	1	2	2	2	2	1	0	0	0	0	0	0	0	0	0	0	1	1	0
26-34	Urban	High School	Not Employed	Employed	Equal number of male and female babies	2 to 6 years	26,000 – 50,000	With Spouse’s extended family	9 months	Female	Simple Vaginal delivery (Normal)	Private hospital	No	No	Yes	1	1	5	4	3	3	3	3	3	3	2	1	1	3	2	1	1	2	1	1	1	0	0	1	0	0	0	0	0	0	0	1	2	0
26-34	Urban	High School	Not Employed	Employed	More female babies	More than 6 years	50,000 – 1 lac PKR	With Spouse’s extended family	9 months	male	C- section	Private hospital	No	No	Yes	6	5	4	4	4	4	6	4	5	4	1	2	2	1	2	2	2	2	2	1	1	1	0	0	0	0	0	0	0	0	0	3	0	0
26-34	Urban	Bachelors	Employed	Employed	More female babies	More than 6 years	50,000 – 1 lac PKR	With Spouse’s extended family	9 months	Female	C- section	Private hospital	No	No	Yes	5	5	5	5	3	3	5	5	5	5	2	1	1	2	1	1	1	1	2	0	1	0	1	0	0	1	0	0	0	0	0	0	0	0
35-44	Urban	High School	Not Employed	Not Employed	More female babies	More than 6 years	26,000 – 50,000	Own house	9 months	male	C- section	Private hospital	No	Yes	Yes	2	3	5	6	6	5	5	5	4	5	3	3	2	2	2	1	3	1	2	1	1	0	0	0	1	0	0	0	0	0	0	2	2	1
16-25	Urban	Bachelors	Not Employed	Employed	More male babies	2 to 6 years	26,000 – 50,000	Own house	9 months	male	C- section	Private hospital	Yes	No	Yes	5	5	5	6	5	6	5	5	5	5	2	0	1	2	3	0	0	2	3	2	1	0	1	1	0	0	0	0	0	0	1	0	0	0
45+	Urban	No Formal education	Not Employed	Employed	Equal number of male and female babies	2 to 6 years	26,000 – 50,000	With Spouse’s extended family	9 months	Female	C- section	Private hospital	No	No	Yes	5	5	5	5	5	5	5	2	5	1	0	1	1	1	3	3	2	1	2	0	1	0	0	0	0	0	0	0	0	0	0	0	0	3
35-44	Urban	High School	Not Employed	Employed	More female babies	More than 6 years	25,000 PKR or less	With Spouse’s extended family	9 months	Female	C- section	Private hospital	No	Yes	Yes	2	2	5	2	5	5	5	5	3	5	1	3	2	2	2	3	3	2	3	0	1	0	0	1	0	0	0	0	0	0	0	3	2	2
35-44	Urban	High School	Not Employed	Employed	More male babies	More than 6 years	50,000 – 1 lac PKR	Own house	9 months	Female	C- section	Private hospital	No	No	Yes	5	5	2	5	4	4	5	4	5	4	2	1	3	3	3	2	1	2	0	0	1	0	0	0	0	0	0	0	0	0	1	3	3	3
16-25	Urban	Masters or higher	Not Employed	Employed	More female babies	More than 6 years	50,000 – 1 lac PKR	With Spouse’s extended family	Less than 9 months	male	C- section	Private hospital	No	Yes	Yes	5	5	5	5	4	4	5	4	5	4	2	1	2	2	2	3	3	2	2	0	1	1	0	0	0	0	0	0	0	0	0	2	2	2
35-44	Rural	No Formal education	Not Employed	Employed	Equal number of male and female babies	More than 6 years	50,000 – 1 lac PKR	With Spouse’s extended family	9 months	Female	C- section	Private hospital	No	Yes	Yes	5	6	6	6	5	5	5	5	5	5	1	0	2	1	2	3	2	1	3	0	1	1	0	0	0	0	0	0	0	0	0	2	2	2
35-44	Urban	High School	Not Employed	Employed	More female babies	More than 6 years	26,000 – 50,000	With Spouse’s extended family	9 months	Female	C- section	Private hospital	No	No	Yes	5	5	5	5	5	4	4	4	5	4	1	1	3	3	1	2	2	1	2	0	1	0	0	0	0	0	0	0	0	0	0	3	0	0
16-25	Rural	Bachelors	Not Employed	Employed	Equal number of male and female babies	2 to 6 years	25,000 PKR or less	With Spouse’s extended family	Less than 9 months	Female	C- section	Private hospital	Yes	No	Yes	3	3	5	5	5	5	5	5	5	5	2	1	1	1	1	2	1	1	2	0	1	0	0	0	0	0	0	0	1	0	0	3	1	2
35-44	Rural	High School	Not Employed	Employed	More female babies	More than 6 years	26,000 – 50,000	With Spouse’s extended family	9 months	Female	C- section	Private hospital	No	Yes	Yes	5	5	5	3	5	5	5	5	1	5	2	1	2	1	2	2	1	3	2	3	1	0	0	0	0	0	0	0	0	0	0	0	0	0
26-34	Urban	Bachelors	Employed	Employed	More female babies	2 to 6 years	26,000 – 50,000	With Spouse’s extended family	9 months	Female	Simple Vaginal delivery (Normal)	Private hospital	No	No	Yes	2	5	5	3	3	3	5	3	3	5	3	3	2	2	2	2	2	2	1	3	1	1	0	0	0	0	0	0	0	0	0	3	0	0
35-44	Rural	Middle	Not Employed	Employed	More female babies	More than 6 years	25,000 PKR or less	With Spouse’s extended family	9 months	Female	Simple Vaginal delivery (Normal)	Private hospital	No	No	Yes	5	5	5	5	5	5	5	5	5	5	1	2	2	2	0	3	2	2	2	0	1	0	0	1	0	0	0	0	1	0	0	3	0	0
35-44	Urban	High School	Not Employed	Employed	More female babies	2 to 6 years	25,000 PKR or less	With Spouse’s extended family	9 months	Female	C- section	Private hospital	No	Yes	Yes	5	5	5	5	5	5	5	5	5	5	1	1	2	1	2	2	1	1	1	0	1	0	0	0	0	0	0	0	0	0	0	0	0	0
35-44	Urban	Masters or higher	Employed	Employed	More male babies	More than 6 years	50,000 – 1 lac PKR	Own house	9 months	male	Simple Vaginal delivery (Normal)	Private hospital	No	No	Yes	5	5	5	5	5	3	5	5	3	3	1	2	2	2	1	2	0	0	3	2	1	0	0	0	1	0	0	1	0	0	0	0	0	0
26-34	Urban	High School	Not Employed	Employed	Equal number of male and female babies	More than 6 years	26,000 – 50,000	Own house	9 months	Female	C- section	Private hospital	No	Yes	Yes	5	6	6	5	5	5	5	5	5	5	2	1	1	1	2	2	2	1	1	0	1	0	0	0	0	0	0	0	0	0	1	0	0	0
16-25	Urban	Middle	Not Employed	Employed	More male babies	More than 6 years	More than 1 lac PKR	With Spouse’s extended family	9 months	Female	C- section	Private hospital	No	No	Yes	3	7	5	7	3	3	5	5	5	5	2	1	2	2	1	2	3	1	1	0	1	1	0	0	0	0	0	0	0	0	0	3	0	2
45+	Urban	Bachelors	Not Employed	Employed	Equal number of male and female babies	More than 6 years	50,000 – 1 lac PKR	Own house	9 months	Female	C- section	Private hospital	No	No	Yes	5	5	5	5	5	4	5	6	5	6	1	3	3	3	2	3	3	2	2	1	1	1	1	0	0	0	0	1	0	0	0	0	0	0
26-34	Urban	Masters or higher	Not Employed	Employed	More female babies	More than 6 years	26,000 – 50,000	With Spouse’s extended family	Less than 9 months	Female	C- section	Private hospital	No	No	Yes	2	5	5	3	3	3	5	3	3	3	1	2	2	1	2	0	1	3	2	0	1	0	0	0	0	0	0	0	0	0	0	0	0	0
26-34	Urban	High School	Employed	Employed	More male babies	More than 6 years	50,000 – 1 lac PKR	Own house	9 months	male	C- section	Private hospital	No	No	Yes	3	3	3	3	3	3	3	1	3	2	2	1	3	1	1	3	2	2	1	2	1	0	0	0	0	1	0	0	0	0	0	1	1	0
16-25	Urban	Bachelors	Employed	Employed	Equal number of male and female babies	More than 6 years	50,000 – 1 lac PKR	Own house	9 months	male	C- section	Private hospital	No	No	Yes	3	3	3	5	5	5	5	5	5	5	0	0	3	3	2	2	1	2	3	0	1	1	0	0	1	1	0	0	0	0	0	0	0	0
35-44	Rural	High School	Not Employed	Employed	More female babies	More than 6 years	26,000 – 50,000	With Spouse’s extended family	9 months	Female	C- section	Private hospital	No	No	Yes	5	5	5	6	4	5	4	6	5	5	2	1	2	0	1	3	3	2	2	0	1	1	0	0	0	0	0	0	0	0	0	2	0	0
26-34	Urban	High School	Employed	Employed	Equal number of male and female babies	2 to 6 years	26,000 – 50,000	With Spouse’s extended family	9 months	male	C- section	Private hospital	No	Yes	Yes	5	6	6	5	3	3	5	5	5	5	2	1	1	2	1	1	1	1	1	1	1	1	0	0	0	0	0	0	0	0	0	2	2	1
16-25	Urban	No Formal education	Not Employed	Employed	More female babies	More than 6 years	25,000 PKR or less	With Spouse’s extended family	9 months	Female	C- section	Private hospital	Yes	No	Yes	5	5	5	5	3	3	3	3	3	3	1	2	2	2	2	1	2	2	1	3	1	0	0	0	0	0	0	0	0	0	1	0	0	0
45+	Rural	Primary	Not Employed	Not Employed	More female babies	More than 6 years	25,000 PKR or less	With Spouse’s extended family	9 months	Female	C- section	Private hospital	No	Yes	Yes	2	5	3	3	3	3	5	3	3	3	1	2	2	1	2	2	2	2	2	0	1	0	0	0	1	0	0	0	0	0	0	2	0	0
35-44	Urban	High School	Not Employed	Employed	Equal number of male and female babies	2 to 6 years	26,000 – 50,000	With Spouse’s extended family	Less than 9 months	Female	C- section	Private hospital	No	No	Yes	5	5	5	5	5	5	5	5	5	5	1	2	2	2	1	2	2	1	2	1	1	0	0	0	0	0	0	1	0	0	0	3	3	2
35-44	Urban	High School	Not Employed	Employed	Equal number of male and female babies	2 to 6 years	26,000 – 50,000	With Spouse’s extended family	9 months	Female	C- section	Private hospital	No	Yes	Yes	4	5	6	5	5	4	5	5	5	5	1	2	2	2	2	2	0	3	3	0	1	1	0	0	0	0	0	0	0	0	1	2	0	2
35-44	Urban	High School	Not Employed	Employed	Equal number of male and female babies	More than 6 years	26,000 – 50,000	With Spouse’s extended family	9 months	Female	C- section	Private hospital	No	Yes	Yes	5	3	3	5	3	3	6	4	5	4	1	1	2	1	1	2	1	2	2	2	1	0	0	0	0	0	0	0	0	0	0	0	3	2
26-34	Urban	Bachelors	Not Employed	Employed	More male babies	More than 6 years	26,000 – 50,000	With Spouse’s extended family	9 months	male	C- section	Government hospital	Yes	No	Yes	5	3	6	6	4	5	5	4	5	5	2	1	2	2	1	1	3	2	2	1	1	1	0	0	0	0	0	0	0	0	0	0	0	0
26-34	Urban	Masters or higher	Not Employed	Employed	More male babies	More than 6 years	26,000 – 50,000	With Spouse’s extended family	Less than 9 months	male	C- section	Private hospital	No	No	Yes	5	5	5	6	5	5	5	3	5	3	1	2	2	2	2	0	3	3	3	3	1	0	0	0	0	0	0	1	0	0	0	0	0	0
16-25	Rural	Middle	Not Employed	Employed	Equal number of male and female babies	More than 6 years	26,000 – 50,000	With Spouse’s extended family	Less than 9 months	Female	C- section	Private hospital	No	Yes	Yes	2	3	3	5	4	4	5	4	5	4	1	1	1	1	1	2	2	2	1	2	1	0	0	1	0	0	0	1	0	0	0	0	0	0
35-44	Urban	High School	Not Employed	Employed	More female babies	More than 6 years	26,000 – 50,000	With Spouse’s extended family	9 months	Female	C- section	Private hospital	No	Yes	Yes	3	5	5	5	5	5	5	5	5	5	1	2	2	0	1	2	2	1	1	1	1	0	0	1	0	0	0	0	0	0	0	2	1	1
16-25	Urban	No Formal education	Not Employed	Not Employed	Equal number of male and female babies	2 to 6 years	25,000 PKR or less	With Spouse’s extended family	Less than 9 months	Female	C- section	Private hospital	No	Yes	Yes	1	2	6	3	5	5	5	5	3	3	3	1	3	2	2	3	3	2	3	0	1	0	0	1	0	0	0	0	0	0	0	0	0	0
35-44	Urban	Middle	Not Employed	Employed	More female babies	More than 6 years	26,000 – 50,000	Own house	9 months	Female	C- section	Private hospital	No	No	Yes	5	5	6	5	4	3	5	3	5	3	1	2	1	1	3	2	2	2	2	1	1	1	0	0	0	0	0	0	0	0	0	0	0	3
26-34	Urban	Primary	Not Employed	Employed	More female babies	More than 6 years	25,000 PKR or less	With Spouse’s extended family	9 months	Female	C- section	Private hospital	No	No	Yes	5	5	5	5	4	4	5	4	5	2	2	3	1	0	1	1	1	2	1	1	1	0	0	1	0	0	0	0	0	0	0	0	0	0
26-34	Urban	High School	Not Employed	Employed	Equal number of male and female babies	More than 6 years	26,000 – 50,000	With Spouse’s extended family	9 months	Female	C- section	Private hospital	No	No	Yes	3	4	5	5	5	5	5	5	5	5	2	1	1	2	0	3	1	0	3	0	1	0	0	0	0	0	0	0	0	0	1	0	0	0
16-25	Urban	Bachelors	Not Employed	Employed	More male babies	2 to 6 years	26,000 – 50,000	With Spouse’s extended family	9 months	male	C- section	Private hospital	Yes	No	Yes	6	6	5	6	5	5	6	5	5	5	2	0	2	2	2	1	2	1	3	1	1	1	0	1	0	1	0	0	0	0	0	2	1	1
35-44	Urban	High School	Not Employed	Employed	More female babies	More than 6 years	26,000 – 50,000	With Spouse’s extended family	Less than 9 months	Female	C- section	Private hospital	No	No	Yes	4	4	3	4	5	5	5	5	3	5	0	1	0	3	3	3	3	3	3	1	1	0	1	0	0	0	0	0	0	0	0	3	3	3
35-44	Urban	High School	Not Employed	Employed	Equal number of male and female babies	More than 6 years	26,000 – 50,000	With Spouse’s extended family	Less than 9 months	Female	C- section	Private hospital	No	No	Yes	7	7	6	5	5	5	5	4	5	4	2	1	1	2	2	1	1	2	2	1	1	1	0	0	0	0	0	0	0	0	0	0	2	2
26-34	Urban	High School	Not Employed	Not Employed	More female babies	2 to 6 years	50,000 – 1 lac PKR	Own house	9 months	Female	C- section	Private hospital	No	No	Yes	5	5	5	5	5	5	5	5	5	5	1	1	1	1	2	3	2	1	0	0	1	0	0	1	0	0	0	0	0	0	0	1	1	1
35-44	Urban	High School	Not Employed	Employed	More female babies	2 to 6 years	26,000 – 50,000	With Spouse’s extended family	9 months	male	C- section	Private hospital	No	No	Yes	5	5	5	5	4	5	6	4	4	5	1	0	1	1	2	2	3	2	2	0	1	0	0	1	0	0	0	0	0	0	0	3	3	3
26-34	Urban	No Formal education	Not Employed	Employed	Equal number of male and female babies	More than 6 years	26,000 – 50,000	With Spouse’s extended family	Less than 9 months	male	C- section	Government hospital	No	No	Yes	1	4	6	6	6	6	6	6	6	4	1	2	2	2	1	1	1	2	1	1	1	0	0	1	0	0	0	0	0	0	0	3	0	0
35-44	Rural	Primary	Not Employed	Employed	More female babies	More than 6 years	26,000 – 50,000	With Spouse’s extended family	9 months	Female	Simple Vaginal delivery (Normal)	Private hospital	No	Yes	Yes	4	5	5	5	5	5	5	5	5	5	1	2	1	1	3	2	1	3	3	1	1	1	0	0	0	0	0	0	0	0	1	3	0	2
16-25	Urban	No Formal education	Not Employed	Employed	More female babies	More than 6 years	26,000 – 50,000	With Spouse’s extended family	9 months	Female	C- section	Private hospital	No	No	Yes	5	5	5	5	5	5	5	5	5	5	3	3	1	1	3	0	2	1	2	1	1	0	0	0	1	0	0	0	0	0	0	2	2	2
26-34	Urban	Masters or higher	Not Employed	Employed	More female babies	More than 6 years	25,000 PKR or less	With Spouse’s extended family	9 months	Female	C- section	Government hospital	No	No	Yes	3	6	6	6	6	5	5	5	5	5	0	1	1	2	2	2	3	3	3	3	1	1	0	0	0	0	0	0	0	0	0	3	0	3
35-44	Urban	No Formal education	Not Employed	Not Employed	More female babies	More than 6 years	25,000 PKR or less	With Spouse’s extended family	Less than 9 months	Female	C- section	Government hospital	No	No	Yes	3	2	3	3	3	3	5	3	3	3	2	1	1	2	2	2	1	1	3	3	1	0	0	0	0	0	0	0	0	0	0	3	3	0
35-44	Urban	Primary	Not Employed	Employed	More male babies	More than 6 years	25,000 PKR or less	Own house	9 months	Female	C- section	Private hospital	No	No	Yes	2	2	5	3	3	3	5	5	4	4	1	2	2	3	3	2	2	2	2	2	1	1	0	0	0	0	0	0	0	0	0	0	0	0
16-25	Urban	Primary	Not Employed	Employed	Equal number of male and female babies	2 to 6 years	25,000 PKR or less	Own house	9 months	Female	C- section	Government hospital	No	Yes	Yes	5	5	5	5	4	5	6	5	5	5	2	1	1	1	2	1	2	1	2	3	1	1	0	0	0	0	0	0	0	0	1	2	0	0
26-34	Urban	High School	Not Employed	Not Employed	More male babies	2 to 6 years	25,000 PKR or less	Own house	9 months	male	C- section	Private hospital	No	No	Yes	4	3	3	3	5	5	5	5	5	5	1	2	2	1	2	2	2	1	3	2	1	1	0	0	0	0	0	0	0	0	0	0	0	3
16-25	Rural	High School	Not Employed	Not Employed	Equal number of male and female babies	2 to 6 years	25,000 PKR or less	With Spouse’s extended family	9 months	Female	C- section	Government hospital	No	No	Yes	2	3	4	4	4	4	5	3	3	3	2	2	1	1	2	1	2	2	1	2	1	0	0	0	0	0	0	0	0	0	0	3	0	0
35-44	Urban	No Formal education	Not Employed	Employed	More male babies	More than 6 years	26,000 – 50,000	With Spouse’s extended family	9 months	Female	Simple Vaginal delivery (Normal)	Government hospital	No	No	Yes	5	5	5	5	5	5	5	3	5	3	2	1	3	1	1	1	2	3	2	3	1	1	0	0	0	0	0	0	0	0	1	0	0	0
26-34	Urban	Primary	Not Employed	Employed	More female babies	More than 6 years	26,000 – 50,000	Own house	Less than 9 months	male	C- section	Government hospital	No	Yes	Yes	5	5	5	5	5	5	5	5	5	5	1	1	1	2	3	2	1	2	3	0	1	1	0	0	0	0	0	0	0	0	0	3	2	2
16-25	Urban	Bachelors	Not Employed	Not Employed	Equal number of male and female babies	More than 6 years	25,000 PKR or less	With Spouse’s extended family	9 months	Female	C- section	Government hospital	No	No	Yes	2	5	5	3	4	5	5	3	3	3	2	1	1	2	2	2	3	2	1	0	1	1	0	0	0	0	0	0	0	0	0	1	1	2
26-34	Urban	Bachelors	Not Employed	Employed	More male babies	More than 6 years	26,000 – 50,000	With Spouse’s extended family	9 months	male	C- section	Private hospital	No	No	Yes	5	5	6	6	5	5	6	5	5	5	1	0	0	3	2	3	2	1	3	3	1	0	0	0	0	0	0	0	0	0	1	0	0	0
16-25	Urban	Middle	Employed	Not Employed	More male babies	More than 6 years	25,000 PKR or less	With Spouse’s extended family	9 months	male	C- section	Government hospital	No	No	Yes	1	3	5	3	5	5	5	4	5	4	1	2	0	0	3	2	3	3	2	2	1	0	0	0	1	0	0	0	0	0	0	3	3	3
35-44	Urban	High School	Not Employed	Not Employed	More female babies	2 to 6 years	25,000 PKR or less	With Spouse’s extended family	9 months	Female	C- section	Government hospital	No	No	Yes	4	5	5	5	5	5	4	5	5	5	1	1	1	2	3	2	1	3	0	0	1	1	0	0	0	0	0	0	0	0	0	2	1	2
26-34	Urban	No Formal education	Not Employed	Employed	Equal number of male and female babies	More than 6 years	26,000 – 50,000	Own house	9 months	male	C- section	Government hospital	No	Yes	Yes	5	5	5	5	5	5	5	5	6	5	2	2	2	1	1	3	3	2	1	3	1	0	0	0	0	0	0	0	0	0	0	0	0	3
16-25	Urban	Primary	Not Employed	Employed	More female babies	2 to 6 years	26,000 – 50,000	Own house	9 months	Female	Simple Vaginal delivery (Normal)	Private hospital	No	No	Yes	4	4	4	4	4	4	5	4	4	4	2	1	2	2	2	1	1	2	2	1	1	0	0	1	0	0	0	0	0	0	0	3	3	3
35-44	Urban	High School	Not Employed	Not Employed	Equal number of male and female babies	More than 6 years	26,000 – 50,000	With Spouse’s extended family	9 months	male	C- section	Government hospital	No	No	Yes	5	6	6	6	6	6	6	5	6	5	1	2	2	3	2	3	3	2	3	3	1	1	0	0	0	0	0	0	0	0	0	1	1	3
35-44	Urban	Bachelors	Not Employed	Employed	More male babies	2 to 6 years	26,000 – 50,000	With Spouse’s extended family	Less than 9 months	male	C- section	Government hospital	No	No	Yes	3	5	6	5	4	4	5	5	5	5	2	0	2	2	2	1	0	3	3	1	1	0	0	0	0	0	0	0	0	0	1	0	0	0
16-25	Urban	No Formal education	Not Employed	Not Employed	More female babies	2 to 6 years	25,000 PKR or less	With Spouse’s extended family	9 months	Female	C- section	Government hospital	Yes	No	Yes	2	5	6	4	5	3	6	3	3	4	2	1	3	2	2	1	1	2	2	0	1	1	0	0	0	0	0	0	0	0	1	1	1	1
26-34	Urban	Bachelors	Employed	Employed	Equal number of male and female babies	2 to 6 years	26,000 – 50,000	Own house	9 months	Female	C- section	Government hospital	No	No	Yes	5	5	5	5	5	5	5	5	5	5	3	2	3	3	2	3	3	3	3	3	1	0	0	0	0	0	0	0	0	0	0	2	2	2
26-34	Urban	Bachelors	Not Employed	Employed	More female babies	More than 6 years	26,000 – 50,000	Own house	9 months	Female	C- section	Government hospital	No	No	Yes	5	5	5	5	6	6	5	6	5	5	1	2	3	2	2	0	3	1	1	0	1	1	0	0	0	0	0	0	0	0	0	2	2	2
26-34	Rural	Middle	Not Employed	Not Employed	More female babies	More than 6 years	25,000 PKR or less	With Spouse’s extended family	9 months	Female	C- section	Government hospital	No	No	Yes	5	5	5	5	5	5	5	5	5	5	2	1	3	1	3	3	2	1	3	3	1	0	0	0	0	0	0	0	0	0	0	0	0	0
26-34	Rural	Primary	Not Employed	Employed	Equal number of male and female babies	2 to 6 years	25,000 PKR or less	With Spouse’s extended family	9 months	male	C- section	Government hospital	No	No	Yes	5	5	5	5	4	5	5	5	5	5	1	1	3	0	2	2	1	3	1	2	1	0	0	0	0	0	0	0	0	0	0	3	3	3
16-25	Rural	High School	Not Employed	Employed	Equal number of male and female babies	2 to 6 years	25,000 PKR or less	With Spouse’s extended family	9 months	Female	C- section	Government hospital	No	No	Yes	5	5	5	5	5	5	5	5	5	5	2	3	2	2	1	2	1	1	2	2	1	1	0	0	0	0	0	0	0	0	0	3	3	2
35-44	Rural	Primary	Not Employed	Employed	More male babies	More than 6 years	25,000 PKR or less	Own house	9 months	male	C- section	Government hospital	No	No	Yes	4	4	5	5	4	4	5	5	5	5	2	1	2	1	2	2	1	2	3	3	1	1	0	0	0	0	0	0	0	0	0	3	3	3
35-44	Urban	High School	Not Employed	Not Employed	Equal number of male and female babies	2 to 6 years	25,000 PKR or less	With Spouse’s extended family	9 months	Female	Simple Vaginal delivery (Normal)	Government hospital	No	No	Yes	4	4	6	6	5	5	5	5	5	4	2	0	0	2	3	3	3	2	2	1	1	0	0	0	0	0	0	0	0	0	0	1	2	2
26-34	Urban	Middle	Not Employed	Not Employed	More female babies	2 to 6 years	25,000 PKR or less	Own house	9 months	male	C- section	Government hospital	No	No	Yes	4	5	5	5	4	4	5	3	3	3	1	2	0	2	2	1	2	3	3	3	1	1	0	0	0	0	0	0	0	0	0	2	0	0
35-44	Urban	Primary	Not Employed	Not Employed	More female babies	More than 6 years	26,000 – 50,000	Own house	9 months	male	Simple Vaginal delivery (Normal)	Government hospital	No	No	Yes	2	5	3	4	4	3	5	4	4	4	2	1	0	2	2	2	3	2	2	2	1	0	0	0	0	0	0	0	0	0	0	1	1	1
26-34	Urban	High School	Not Employed	Not Employed	More male babies	2 to 6 years	25,000 PKR or less	With Spouse’s extended family	9 months	Female	C- section	Government hospital	No	No	Yes	5	5	3	5	5	5	5	5	5	5	2	1	0	2	3	2	3	2	2	1	1	1	0	0	0	0	0	0	0	0	0	0	0	0
26-34	Urban	High School	Not Employed	Employed	More male babies	2 to 6 years	26,000 – 50,000	With Spouse’s extended family	9 months	male	C- section	Government hospital	Yes	No	Yes	4	5	4	4	5	5	5	5	5	5	3	1	2	2	2	2	1	1	3	1	1	1	0	1	0	0	0	0	0	0	0	1	1	1
16-25	Urban	Bachelors	Not Employed	Employed	More female babies	More than 6 years	26,000 – 50,000	Own house	9 months	male	C- section	Government hospital	No	No	Yes	5	5	5	5	5	5	6	5	5	5	2	1	2	1	2	2	2	1	2	2	1	1	0	0	0	0	0	0	0	0	0	1	1	1
16-25	Urban	High School	Not Employed	Employed	More male babies	More than 6 years	25,000 PKR or less	With Spouse’s extended family	9 months	Female	C- section	Government hospital	No	No	Yes	4	3	3	3	3	3	3	3	5	4	1	1	2	1	1	3	3	3	3	0	1	1	0	0	0	0	0	0	0	0	0	0	0	1
26-34	Urban	Middle	Not Employed	Employed	More female babies	2 to 6 years	26,000 – 50,000	Own house	Less than 9 months	male	C- section	Government hospital	No	Yes	Yes	3	5	5	5	5	5	5	5	5	5	1	2	2	2	1	2	2	2	2	3	1	1	0	0	0	0	0	0	0	0	0	1	1	1
35-44	Urban	High School	Not Employed	Employed	Equal number of male and female babies	More than 6 years	26,000 – 50,000	With Spouse’s extended family	9 months	Female	C- section	Government hospital	No	No	Yes	5	5	5	5	5	5	5	5	5	5	1	2	3	2	3	2	3	2	3	1	1	0	0	0	0	0	0	0	0	0	0	2	1	1
35-44	Urban	High School	Not Employed	Employed	Equal number of male and female babies	More than 6 years	50,000 – 1 lac PKR	Own house	9 months	male	C- section	Government hospital	No	No	Yes	5	5	5	5	5	5	5	5	3	4	2	2	2	3	3	2	3	2	1	2	1	0	0	1	0	0	0	0	0	0	0	2	1	2
26-34	Urban	High School	Not Employed	Employed	Equal number of male and female babies	More than 6 years	More than 1 lac PKR	With Spouse’s extended family	Less than 9 months	Female	C- section	Private hospital	Yes	No	Yes	5	5	7	3	2	4	6	4	5	5	2	1	2	2	2	1	2	1	3	3	1	0	0	0	1	0	0	0	0	0	0	2	1	3
26-34	Urban	High School	Not Employed	Employed	More female babies	2 to 6 years	50,000 – 1 lac PKR	With Spouse’s extended family	9 months	Female	C- section	Private hospital	No	Yes	Yes	5	6	6	6	5	5	5	5	6	5	1	1	3	2	2	2	3	2	2	2	1	1	0	0	0	0	0	0	0	0	0	2	0	2
35-44	Urban	Middle	Not Employed	Employed	Equal number of male and female babies	More than 6 years	26,000 – 50,000	With Spouse’s extended family	9 months	Female	C- section	Private hospital	No	No	Yes	5	6	6	6	6	6	6	6	5	5	1	1	3	2	3	2	1	0	2	1	1	1	0	1	0	0	0	0	0	0	0	0	0	0
35-44	Urban	No Formal education	Not Employed	Employed	More male babies	More than 6 years	26,000 – 50,000	With Spouse’s extended family	Less than 9 months	male	C- section	Private hospital	No	Yes	Yes	3	5	5	5	5	3	5	5	6	5	1	1	1	3	2	2	2	2	2	1	1	1	0	0	0	0	0	0	0	0	0	2	0	0
26-34	Urban	High School	Not Employed	Not Employed	More female babies	More than 6 years	26,000 – 50,000	With Spouse’s extended family	9 months	Female	C- section	Private hospital	No	No	Yes	5	5	5	3	5	5	3	3	5	5	2	2	2	2	2	2	1	3	2	2	1	0	1	0	0	0	0	0	0	0	0	2	1	0
26-34	Urban	Middle	Not Employed	Employed	More female babies	More than 6 years	26,000 – 50,000	Own house	9 months	Female	C- section	Private hospital	No	Yes	Yes	5	5	4	4	5	5	6	5	5	5	2	1	1	1	2	1	2	2	1	2	1	1	0	0	0	0	0	0	0	0	0	0	1	1
16-25	Urban	High School	Employed	Employed	More female babies	More than 6 years	50,000 – 1 lac PKR	Own house	9 months	Female	C- section	Private hospital	No	No	Yes	5	5	5	5	5	5	5	5	5	5	3	1	2	2	1	2	2	3	2	2	1	0	0	1	0	0	0	0	0	0	0	1	0	2
26-34	Urban	Middle	Not Employed	Employed	More female babies	More than 6 years	26,000 – 50,000	With Spouse’s extended family	9 months	Female	C- section	Private hospital	Yes	No	Yes	5	5	5	6	5	5	5	6	5	5	2	1	3	3	2	2	2	3	3	3	1	1	0	0	0	0	0	0	0	0	0	2	1	0
35-44	Rural	High School	Not Employed	Not Employed	More female babies	2 to 6 years	26,000 – 50,000	With Spouse’s extended family	9 months	Female	C- section	Private hospital	No	No	Yes	5	5	5	5	5	5	5	5	5	5	2	2	3	2	2	1	2	1	3	2	1	1	0	1	0	0	0	0	0	0	0	1	2	2
26-34	Urban	High School	Not Employed	Not Employed	More female babies	More than 6 years	25,000 PKR or less	Own house	9 months	Female	C- section	Private hospital	No	Yes	Yes	5	5	5	5	5	5	5	5	5	4	2	1	3	2	2	2	1	3	3	2	1	1	0	0	0	0	0	0	0	0	0	1	1	0
16-25	Urban	High School	Not Employed	Employed	More female babies	2 to 6 years	25,000 PKR or less	Own house	9 months	Female	C- section	Private hospital	No	No	Yes	3	3	5	5	5	5	5	5	4	5	2	2	2	2	2	2	2	2	2	1	1	0	0	0	1	0	0	0	0	0	0	2	1	3
26-34	Urban	Masters or higher	Not Employed	Employed	Equal number of male and female babies	More than 6 years	25,000 PKR or less	Own house	9 months	Female	C- section	Private hospital	No	No	Yes	5	5	5	5	6	5	5	6	4	6	2	1	3	2	2	2	2	3	2	2	1	1	0	0	0	0	0	0	0	0	1	0	0	0
26-34	Urban	High School	Not Employed	Not Employed	More female babies	2 to 6 years	26,000 – 50,000	With Spouse’s extended family	9 months	Female	C- section	Private hospital	Yes	No	Yes	6	6	5	6	5	5	4	5	5	5	2	1	2	2	2	1	2	3	3	2	1	0	0	0	1	0	0	0	0	0	0	0	0	0
26-34	Urban	High School	Not Employed	Not Employed	More female babies	More than 6 years	25,000 PKR or less	With Spouse’s extended family	Less than 9 months	male	C- section	Private hospital	No	Yes	Yes	5	5	5	3	3	3	7	5	3	3	1	1	3	3	3	3	3	3	3	3	1	1	0	0	1	0	0	0	0	0	0	0	0	0
26-34	Urban	Bachelors	Employed	Employed	More female babies	More than 6 years	26,000 – 50,000	Own house	9 months	Female	C- section	Private hospital	No	Yes	Yes	3	5	5	5	5	5	5	2	5	2	2	1	2	2	2	1	3	2	2	3	1	1	0	0	0	0	0	1	0	0	0	1	2	1
26-34	Urban	Primary	Not Employed	Employed	Equal number of male and female babies	2 to 6 years	26,000 – 50,000	With Spouse’s extended family	9 months	Female	C- section	Private hospital	No	Yes	Yes	5	5	5	3	3	3	7	3	7	3	2	2	2	2	2	2	1	2	1	3	1	1	0	0	0	0	0	0	0	0	0	2	2	2
26-34	Rural	High School	Not Employed	Employed	Equal number of male and female babies	2 to 6 years	25,000 PKR or less	With Spouse’s extended family	9 months	male	C- section	Private hospital	No	No	Yes	5	3	3	3	4	3	5	4	5	4	2	1	3	3	3	3	3	2	2	3	1	0	0	1	0	0	0	0	0	0	0	2	2	3
16-25	Urban	High School	Not Employed	Not Employed	More female babies	2 to 6 years	25,000 PKR or less	With Spouse’s extended family	9 months	Female	C- section	Government hospital	No	No	Yes	3	3	3	3	5	3	5	4	5	4	2	2	2	2	2	2	2	2	2	1	1	1	0	0	0	0	0	0	0	0	0	2	0	0
26-34	Urban	High School	Not Employed	Not Employed	More female babies	2 to 6 years	26,000 – 50,000	With Spouse’s extended family	9 months	male	C- section	Government hospital	No	No	Yes	5	5	5	5	5	5	5	5	5	5	2	1	2	1	2	1	3	2	3	2	1	1	0	0	0	0	0	0	0	0	0	2	0	0
26-34	Urban	Bachelors	Not Employed	Employed	More male babies	More than 6 years	26,000 – 50,000	Own house	9 months	Female	C- section	Private hospital	No	No	Yes	2	5	5	5	6	6	6	6	6	6	2	1	2	1	1	2	2	1	2	2	1	1	0	0	0	0	0	0	0	0	0	1	2	0
16-25	Urban	Primary	Not Employed	Employed	Equal number of male and female babies	More than 6 years	25,000 PKR or less	With Spouse’s extended family	Less than 9 months	Female	C- section	Government hospital	No	Yes	Yes	6	6	6	5	5	5	5	4	5	4	1	2	1	2	2	2	2	2	3	2	1	1	0	0	0	0	0	0	0	0	0	0	0	0
26-34	Urban	High School	Not Employed	Not Employed	More female babies	2 to 6 years	26,000 – 50,000	Own house	9 months	Female	C- section	Private hospital	Yes	No	Yes	5	5	3	3	5	6	5	5	5	5	2	2	2	3	1	3	3	3	2		1	1	0	0	0	0	0	0	0	0	0	3	0	0
26-34	Urban	High School	Not Employed	Not Employed	More female babies	More than 6 years	26,000 – 50,000	With Spouse’s extended family	9 months	Female	C- section	Private hospital	No	Yes	Yes	5	6	6	3	5	5	5	5	5	5	3	2	2	2	2	1	3	2	2	2	1	1	0	0	0	0	0	0	0	0	0	0	0	0
16-25	Urban	Middle	Not Employed	Employed	More female babies	2 to 6 years	25,000 PKR or less	Own house	9 months	male	C- section	Private hospital	Yes	No	Yes	5	5	7	5	5	3	5	4	5	4	2	1	2	2	2	1	2	2	2	2	1	0	0	0	1	0	0	0	0	0	0	2	1	1
16-25	Urban	High School	Not Employed	Not Employed	Equal number of male and female babies	2 to 6 years	25,000 PKR or less	With Spouse’s extended family	9 months	male	Simple Vaginal delivery (Normal)	Private hospital	No	No	Yes	2	2	2	5	5	5	5	5	5	5	2	1	1	2	2	2	2	3	3	2	1	0	0	1	0	0	0	0	0	0	0	2	2	0
26-34	Urban	Primary	Not Employed	Employed	Equal number of male and female babies	More than 6 years	25,000 PKR or less	With Spouse’s extended family	9 months	male	C- section	Private hospital	No	No	Yes	4	5	5	5	5	5	5	5	6	5	1	2	2	2	3	3	2	2	2	2	1	0	0	0	0	0	0	0	0	0	0	1	1	2
16-25	Rural	High School	Not Employed	Not Employed	More female babies	2 to 6 years	26,000 – 50,000	With Spouse’s extended family	9 months	Female	C- section	Private hospital	Yes	No	Yes	3	3	3	6	4	4	4	4	4	4	2	1	3	1	2	2	2	2	2	3	1	0	0	0	0	0	0	0	0	0	0	2	3	3
26-34	Rural	No Formal education	Not Employed	Not Employed	More female babies	2 to 6 years	25,000 PKR or less	With Spouse’s extended family	9 months	Female	C- section	Government hospital	No	Yes	Yes	4	4	6	5	4	4	5	5	5	5	1	1	1	2	2	3	3	2	2	1	1	0	0	0	1	0	0	0	0	0	0	2	2	1
26-34	Urban	Primary	Not Employed	Employed	Equal number of male and female babies	More than 6 years	25,000 PKR or less	With Spouse’s extended family	9 months	Female	Simple Vaginal delivery (Normal)	Private hospital	No	No	Yes	6	6	6	6	3	4	6	5	5	5	2	1	2	2	2	2	2	2	3	0	1	1	0	0	0	0	0	0	0	0	0	1	2	2
16-25	Rural	High School	Not Employed	Employed	More female babies	More than 6 years	26,000 – 50,000	With Spouse’s extended family	9 months	male	C- section	Private hospital	No	No	Yes	5	3	5	6	6	6	6	6	6	6	1	2	1	2	1	2	1	3	2	3	1	1	0	0	0	0	0	0	0	0	0	2	3	2
35-44	Urban	Middle	Not Employed	Employed	More male babies	More than 6 years	26,000 – 50,000	Own house	9 months	male	C- section	Private hospital	No	No	Yes	4	6	5	5	5	5	4	5	5	5	1	2	2	1	2	2	3	2	2	3	1	1	0	0	0	0	0	0	0	0	1	2	2	3
35-44	Rural	Primary	Not Employed	Employed	Equal number of male and female babies	More than 6 years	25,000 PKR or less	With Spouse’s extended family	Less than 9 months	male	C- section	Private hospital	No	Yes	Yes	3	1	5	5	5	5	6	6	5	5	1	1	2	2	2	2	3	1	2	2	1	1	0	0	0	0	0	0	0	0	0	2	1	2
26-34	Urban	High School	Not Employed	Not Employed	More male babies	2 to 6 years	26,000 – 50,000	Own house	9 months	male	C- section	Private hospital	Yes	No	Yes	4	2	5	5	3	4	3	5	3	6	2	1	3	2	2	3	2	3	2	2	1	0	0	0	0	0	0	0	0	0	0	0	0	2
26-34	Urban	High School	Not Employed	Employed	More female babies	More than 6 years	25,000 PKR or less	With Spouse’s extended family	9 months	male	Simple Vaginal delivery (Normal)	Government hospital	No	No	Yes	7	6	6	6	5	6	6	5	5	5	0	0	2	1	3	3	2	2	2	2	1	1	0	0	0	0	0	0	0	0	0	2	2	2
16-25	Rural	Bachelors	Employed	Not Employed	More female babies	More than 6 years	26,000 – 50,000	With Spouse’s extended family	9 months	male	C- section	Government hospital	No	No	Yes	4	5	5	5	5	3	3	3	5	5	2	1	2	2	3	3	3	0	3	3	1	1	0	0	0	0	0	0	0	0	0	1	2	0
26-34	Urban	Bachelors	Not Employed	Employed	More female babies	More than 6 years	26,000 – 50,000	With Spouse’s extended family	9 months	Female	C- section	Government hospital	No	Yes	Yes	5	5	5	5	5	5	5	5	5	5	1	2	2	1	3	2	1	3	2	2	1	1	0	0	0	0	0	0	0	0	0	2	1	0
16-25	Urban	Middle	Employed	Not Employed	Equal number of male and female babies	2 to 6 years	25,000 PKR or less	With Spouse’s extended family	9 months	male	Simple Vaginal delivery (Normal)	Government hospital	No	No	Yes	3	5	5	5	5	5	5	5	5	5	1	2	2	1	2	2	3	3	3	3	1	0	0	1	0	0	0	0	0	0	0	0	0	3
35-44	Urban	Bachelors	Employed	Employed	More male babies	More than 6 years	25,000 PKR or less	With Spouse’s extended family	9 months	Female	C- section	Private hospital	Yes	No	Yes	3	6	5	6	4	4	5	6	5	5	0	1	2	2	2	2	3	2	2	0	1	1	1	0	0	0	0	0	0	0	0	1	0	0
26-34	Urban	High School	Not Employed	Employed	More female babies	2 to 6 years	26,000 – 50,000	Own house	9 months	Female	C- section	Government hospital	No	Yes	Yes	5	5	5	5	5	5	5	5	5	5	1	2	3	1	2	2	1	3	2	0	1	1	0	0	0	0	0	0	0	0	0	3	2	2
26-34	Urban	Primary	Not Employed	Not Employed	Equal number of male and female babies	More than 6 years	25,000 PKR or less	With Spouse’s extended family	9 months	Female	Simple Vaginal delivery (Normal)	Government hospital	No	No	Yes	2	3	3	5	4	3	5	3	3	4	2	1	2	1	2	3	2	3	2	3	1	0	0	0	0	0	0	0	0	0	0	2	0	2
26-34	Urban	High School	Not Employed	Not Employed	More male babies	More than 6 years	25,000 PKR or less	Own house	9 months	male	C- section	Government hospital	No	No	Yes	5	5	5	5	5	5	5	5	5	5	2	1	3	2	3	2	3	2	2	3	1	1	0	1	1	0	0	0	0	0	0	0	0	3
26-34	Urban	No Formal education	Not Employed	Employed	More female babies	2 to 6 years	26,000 – 50,000	Own house	9 months	male	C- section	Government hospital	No	No	Yes	5	5	5	5	3	4	5	4	4	5	1	2	3	2	2	3	3	2	3	2	1	0	0	1	1	0	0	0	0	0	0	2	2	1
35-44	Urban	High School	Not Employed	Not Employed	More female babies	More than 6 years	26,000 – 50,000	With Spouse’s extended family	9 months	Female	C- section	Government hospital	No	No	Yes	5	4	6	4	5	4	4	4	5	4	2	1	2	1	2	1	3	3	3	0	1	1	0	0	0	0	0	0	0	0	0	3	3	3
16-25	Urban	High School	Not Employed	Employed	More female babies	2 to 6 years	26,000 – 50,000	With Spouse’s extended family	9 months	Female	C- section	Government hospital	No	No	Yes	5	5	5	5	5	5	5	5	5	5	1	1	1	2	2	2	3	3	3	2	1	1	0	0	0	0	0	0	0	0	0	2	2	3
26-34	Urban	Bachelors	Not Employed	Employed	More male babies	2 to 6 years	26,000 – 50,000	Own house	Less than 9 months	male	C- section	Home	Yes	No	Yes	5	6	6	6	6	6	6	5	6	6	2	1	2	3	2	2	3	3	3	3	1	0	0	0	0	0	0	0	0	0	0	2	1	3
26-34	Urban	Middle	Not Employed	Not Employed	More female babies	2 to 6 years	26,000 – 50,000	With Spouse’s extended family	Less than 9 months	male	C- section	Government hospital	No	No	Yes	6	6	6	5	4	4	6	6	5	5	2	1	2	1	2	3	2	3	1	0	1	0	0	0	0	0	0	0	0	0	0	3	3	3
16-25	Urban	High School	Not Employed	Employed	More female babies	2 to 6 years	25,000 PKR or less	With Spouse’s extended family	9 months	Female	C- section	Government hospital	Yes	No	Yes	5	5	5	5	5	5	5	5	6	4	1	2	3	0	3	3	3	3	3	1	1	0	0	0	0	0	0	0	0	0	0	2	2	2
26-34	Urban	Middle	Not Employed	Employed	Equal number of male and female babies	2 to 6 years	26,000 – 50,000	With Spouse’s extended family	9 months	Female	C- section	Government hospital	No	No	Yes	1	5	4	5	4	5	1	4	5	5	2	2	2	1	3	2	3	2	3	3	1	1	0	0	0	0	0	0	0	0	0	0	1	0
16-25	Rural	High School	Not Employed	Employed	More male babies	Less than one year	25,000 PKR or less	With Spouse’s extended family	Less than 9 months	male	C- section	Government hospital	Yes	No	Yes	5	6	5	6	5	5	6	5	5	5	0	0	3	3	1	1	1	3	3	1	1	1	0	0	0	0	0	0	0	0	0	1	1	3
35-44	Urban	High School	Not Employed	Not Employed	More female babies	2 to 6 years	26,000 – 50,000	With Spouse’s extended family	9 months	male	C- section	Government hospital	No	No	Yes	5	5	6	5	3	4	7	5	6	5	2	1	1	0	2	2	2	3	0	3	1	0	0	0	0	0	0	0	0	0	0	1	2	1
16-25	Urban	High School	Not Employed	Not Employed	More female babies	2 to 6 years	25,000 PKR or less	Own house	9 months	Female	Simple Vaginal delivery (Normal)	Government hospital	No	Yes	Yes	5	5	6	5	5	5	5	5	5	5	1	2	2	2	2	2	2	1	1	0	1	0	0	0	1	0	0	0	0	0	0	1	2	2
35-44	Rural	Bachelors	Employed	Employed	More male babies	2 to 6 years	26,000 – 50,000	Own house	9 months	male	C- section	Government hospital	No	No	Yes	5	6	6	6	6	6	6	6	6	6	1	2	1	1	2	1	1	2	3	1	1	1	0	0	0	0	0	0	0	0	0	1	1	1
26-34	Urban	Primary	Not Employed	Employed	More female babies	More than 6 years	25,000 PKR or less	Own house	9 months	Female	C- section	Government hospital	No	No	Yes	5	5	5	5	5	5	5	5	5	5	1	2	2	3	2	2	3	3	1	0	1	0	0	0	0	0	0	0	0	0	0	1	1	3
16-25	Urban	No Formal education	Not Employed	Employed	More male babies	2 to 6 years	25,000 PKR or less	With Spouse’s extended family	9 months	male	C- section	Government hospital	Yes	No	Yes	5	3	5	5	5	5	5	5	3	3	2	1	2	1	2	1	2	2	3	1	1	1	0	0	0	0	0	0	0	0	0	1	1	1
16-25	Urban	High School	Not Employed	Employed	More female babies	2 to 6 years	25,000 PKR or less	With Spouse’s extended family	9 months	male	C- section	Government hospital	No	No	Yes	5	4	4	5	5	4	4	5	5	5	1	2	2	1	3	1	2	3	3	0	1	0	0	0	1	0	0	0	0	0	0	2	1	1
16-25	Urban	High School	Not Employed	Not Employed	More female babies	2 to 6 years	25,000 PKR or less	With Spouse’s extended family	9 months	male	C- section	Government hospital	No	Yes	Yes	3	5	5	5	1	1	5	3	4	3	2	1	3	1	2	3	2	0	3	0	1	1	0	0	0	0	0	0	0	0	0	2	2	2
16-25	Rural	No Formal education	Not Employed	Not Employed	Equal number of male and female babies	2 to 6 years	25,000 PKR or less	With Spouse’s extended family	9 months	Female	C- section	Private hospital	Yes	No	Yes	4	5	5	5	5	5	5	5	5	5	2	1	2	2	3	3	3	2	3	2	1	1	0	0	0	0	0	0	0	0	0	2	1	2
16-25	Urban	High School	Not Employed	Not Employed	More female babies	More than 6 years	25,000 PKR or less	Own house	9 months	male	C- section	Government hospital	No	No	Yes	5	5	5	5	5	5	5	5	6	4	2	1	2	2	3	2	3	3	3	0	1	0	0	0	0	0	0	0	0	0	1	1	1	1
35-44	Urban	High School	Not Employed	Not Employed	Equal number of male and female babies	More than 6 years	25,000 PKR or less	With Spouse’s extended family	9 months	Female	C- section	Government hospital	No	No	Yes	3	3	5	5	3	4	3	3	3	4	1	2	1	2	2	3	3	3	3	1	1	0	0	0	1	0	0	0	0	0	0	2	1	1
26-34	Rural	High School	Not Employed	Not Employed	More female babies	2 to 6 years	25,000 PKR or less	Own house	Less than 9 months	male	C- section	Government hospital	No	No	Yes	4	5	5	5	4	3	5	5	5	5	0	0	2	1	2	2	3	2	3	2	1	1	0	0	0	0	0	0	0	0	0	2	1	2
35-44	Rural	Middle	Not Employed	Employed	More female babies	More than 6 years	25,000 PKR or less	With Spouse’s extended family	9 months	male	C- section	Government hospital	No	No	Yes	3	5	6	6	6	6	6	6	6	6	1	2	3	2	2	2	2	1	3	2	1	1	0	0	0	0	0	0	0	0	0	2	1	2
35-44	Urban	Primary	Not Employed	Employed	More female babies	2 to 6 years	26,000 – 50,000	Own house	9 months	Female	Simple Vaginal delivery (Normal)	Government hospital	Yes	No	Yes	6	5	6	6	6	2	6	6	5	5	1	1	1	1	2	3	3	1	3	0	1	0	0	0	0	0	0	0	0	0	1	1	1	3
26-34	Urban	High School	Not Employed	Not Employed	More female babies	Less than one year	26,000 – 50,000	Own house	Less than 9 months	Female	C- section	Government hospital	No	No	Yes	3	5	7	5	5	5	5	2	4	4	1	1	2	1	3	3	2	2	2	3	1	1	0	0	1	0	0	0	0	0	0	1	2	2
26-34	Urban	Bachelors	Employed	Employed	More male babies	2 to 6 years	25,000 PKR or less	Own house	9 months	male	C- section	Government hospital	No	No	Yes	6	6	6	6	6	6	6	6	6	6	3	0	2	2	3	2	1	3	2	3	1	1	1	0	0	0	0	0	0	0	1	0	0	0
26-34	Urban	No Formal education	Not Employed	Not Employed	More female babies	More than 6 years	26,000 – 50,000	With Spouse’s extended family	9 months	Female	C- section	Government hospital	No	Yes	Yes	4	6	7	6	7	6	7	5	7	7	2	1	2	1	1	1	1	1	1	1	1	0	0	0	0	0	0	0	1	0	1	0	2	1
16-25	Urban	Middle	Not Employed	Employed	More female babies	2 to 6 years	25,000 PKR or less	With Spouse’s extended family	9 months	male	C- section	Government hospital	No	No	Yes	5	6	6	6	6	6	6	3	3	3	1	0	2	2	3	2	2	1	1	1	1	1	0	0	0	0	0	0	0	0	1	2	1	1
26-34	Urban	No Formal education	Not Employed	Employed	More male babies	2 to 6 years	More than 1 lac PKR	Own house	9 months	Female	C- section	Government hospital	No	Yes	Yes	1	6	6	2	3	3	3	3	6	3	2	2	2	0	1	1	3	3	3	2	1	1	0	0	0	0	0	0	0	0	0	0	0	0
16-25	Urban	Primary	Not Employed	Not Employed	More female babies	More than 6 years	26,000 – 50,000	Own house	9 months	Female	C- section	Government hospital	Yes	No	Yes	3	2	3	3	5	6	6	6	6	4	1	2	0	1	2	1	3	3	2	3	1	0	0	0	0	0	0	0	1	0	1	2	2	2
35-44	Rural	High School	Not Employed	Employed	More female babies	2 to 6 years	26,000 – 50,000	Own house	9 months	Female	C- section	Government hospital	Yes	No	Yes	2	2	3	6	5	2	6	2	2	6	0	0	3	1	2	1	3	1	3	2	1	1	0	0	0	0	0	0	1	0	1	1	1	1
35-44	Urban	Primary	Not Employed	Not Employed	More male babies	2 to 6 years	25,000 PKR or less	Own house	9 months	male	C- section	Government hospital	No	No	Yes	2	6	6	3	6	1	5	3	6	7	2	0	1	0	2	3	2	3	2	1	1	0	0	0	0	0	1	0	0	0	0	2	2	3
26-34	Urban	Primary	Not Employed	Employed	More female babies	More than 6 years	25,000 PKR or less	Own house	9 months	Female	C- section	Government hospital	Yes	No	Yes	4	3	6	3	4	4	6	3	5	3	2	1	2	2	2	0	3	2	2	3	1	0	0	0	0	0	0	0	0	0	0	3	2	2
26-34	Urban	Primary	Not Employed	Employed	More female babies	2 to 6 years	25,000 PKR or less	With Spouse’s extended family	9 months	male	Simple Vaginal delivery (Normal)	Government hospital	No	No	Yes	6	3	3	3	3	5	3	5	3	5	2	1	3	2	2	2	0	2	3	1	1	0	0	0	1	0	0	0	0	0	0	2	1	3
26-34	Urban	Primary	Not Employed	Not Employed	More male babies	2 to 6 years	26,000 – 50,000	Own house	Less than 9 months	male	C- section	Government hospital	No	No	Yes	3	3	3	3	2	6	6	4	6	4	1	2	2	2	3	1	1	3	2	0	1	1	0	0	0	0	0	0	0	0	0	2	3	2
26-34	Urban	Primary	Not Employed	Employed	Equal number of male and female babies	More than 6 years	25,000 PKR or less	Own house	9 months	male	C- section	Government hospital	No	No	Yes	2	5	4	5	3	2	6	3	6	4	0	0	0	3	3	3	3	3	3	3	1	1	0	0	0	0	0	0	0	0	0	2	3	2
26-34	Urban	Primary	Not Employed	Not Employed	More female babies	More than 6 years	25,000 PKR or less	Own house	Less than 9 months	Female	C- section	Government hospital	No	No	Yes	2	5	2	7	2	3	6	3	2	2	3	3	3	3	3	3	3	3	3	3	1	0	0	0	1	0	0	0	0	0	0	2	3	2
35-44	Urban	No Formal education	Not Employed	Not Employed	Equal number of male and female babies	2 to 6 years	26,000 – 50,000	With Spouse’s extended family	Less than 9 months	Female	C- section	Government hospital	No	Yes	Yes	5	3	5	3	2	6	3	4	3	3	1	2	2	3	3	2	1	3	1	0	1	1	0	0	0	0	0	0	0	0	0	2	3	2
35-44	Urban	Primary	Not Employed	Employed	More female babies	2 to 6 years	26,000 – 50,000	With Spouse’s extended family	Less than 9 months	Female	C- section	Government hospital	No	No	Yes	2	5	6	3	6	1	1	3	3	2	1	2	3	0	2	1	3	0	3	3	1	0	0	0	0	0	0	0	1	0	0	3	2	1
26-34	Urban	Bachelors	Employed	Not Employed	More female babies	2 to 6 years	26,000 – 50,000	With Spouse’s extended family	9 months	Female	Simple Vaginal delivery (Normal)	Government hospital	No	Yes	Yes	5	2	3	1	3	2	2	3	2	2	2	1	2	2	3	2	3	2	2	3	1	1	0	0	0	0	0	0	0	0	0	3	1	2
26-34	Urban	Primary	Not Employed	Not Employed	More male babies	2 to 6 years	26,000 – 50,000	With Spouse’s extended family	9 months	Female	C- section	Government hospital	No	No	Yes	3	5	2	2	2	1	3	2	1	3	2	3	0	2	1	2	1	2	3	1	1	0	0	0	0	0	0	0	0	0	0	1	2	1
26-34	Urban	Primary	Employed	Not Employed	More female babies	More than 6 years	26,000 – 50,000	With Spouse’s extended family	Less than 9 months	Female	C- section	Private hospital	Yes	No	Yes	3	2	1	2	3	1	1	2	2	3	1	1	2	2	3	2	3	1	3	2	1	0	0	0	1	0	0	1	1	0	1	1	1	3
26-34	Rural	No Formal education	Not Employed	Not Employed	More female babies	More than 6 years	26,000 – 50,000	Own house	Less than 9 months	Female	C- section	Government hospital	Yes	No	Yes	3	3	5	3	2	1	3	2	1	3	2	1	2	2	1	3	3	2	2	3	1	1	1	0	0	0	0	0	0	0	1	3	2	3
26-34	Rural	High School	Not Employed	Employed	More female babies	2 to 6 years	26,000 – 50,000	Own house	9 months	Female	C- section	Government hospital	No	No	Yes	2	3	1	2	3	1	3	2	6	4	3	3	3	3	3	3	3	3	3	3	1	1	0	0	0	0	0	0	0	0	0	3	3	3
26-34	Urban	No Formal education	Not Employed	Employed	More female babies	More than 6 years	26,000 – 50,000	With Spouse’s extended family	9 months	Female	C- section	Government hospital	No	No	Yes	3	2	3	6	1	5	1	5	1	1	3	3	3	3	3	3	3	3	3	3	1	0	0	0	1	0	0	0	1	0	1	2	2	3
16-25	Urban	Bachelors	Not Employed	Employed	More female babies	2 to 6 years	50,000 – 1 lac PKR	Own house	9 months	male	C- section	Government hospital	Yes	No	Yes	3	3	3	2	1	3	4	3	3	3	3	3	3	3	3	3	3	3	3	3	1	0	0	1	0	0	0	0	0	0	0	1	3	2
26-34	Urban	Primary	Not Employed	Employed	More female babies	More than 6 years	26,000 – 50,000	With Spouse’s extended family	Less than 9 months	male	C- section	Government hospital	No	No	Yes	3	3	4	3	2	2	2	1	2	3	3	3	3	3	3	3	3	3	3	3	1	1	0	0	0	0	0	0	0	0	0	2	2	3
16-25	Rural	No Formal education	Not Employed	Employed	More female babies	More than 6 years	25,000 PKR or less	Own house	Less than 9 months	Female	C- section	Government hospital	Yes	Yes	Yes	6	7	6	6	1	1	6	1	6	1	3	3	3	3	3	3	3	3	3	3	1	0	0	0	0	0	0	0	0	0	1	3	3	3
16-25	Urban	Middle	Not Employed	Employed	More male babies	2 to 6 years	25,000 PKR or less	With Spouse’s extended family	9 months	male	C- section	Government hospital	No	No	Yes	3	4	3	2	2	3	3	3	1	2	3	3	3	3	0	3	3	3	3	3	1	0	0	0	1	0	0	0	0	0	1	3	3	2
26-34	Urban	Masters or higher	Not Employed	Employed	More female babies	2 to 6 years	50,000 – 1 lac PKR	With Spouse’s extended family	9 months	Female	C- section	Private hospital	No	No	Yes	5	5	6	5	4	4	4	5	5	4	3	3	3	3	2	3	3	3	3	3	1	0	0	0	0	0	0	0	0	0	0	3	3	3
35-44	Urban	Primary	Not Employed	Employed	More male babies	2 to 6 years	25,000 PKR or less	With Spouse’s extended family	9 months	Female	Simple Vaginal delivery (Normal)	Government hospital	No	No	Yes	4	5	5	3	3	3	3	2	3	3	3	3	2	1	3	2	3	3	3	1	1	0	0	0	0	0	0	0	0	0	0	2	3	2
26-34	Urban	No Formal education	Not Employed	Employed	More female babies	Less than one year	25,000 PKR or less	Own house	Less than 9 months	Female	C- section	Government hospital	No	No	Yes	5	5	2	2	1	2	3	2	3	2	3	3	3	3	3	2	1	0	3	2	1	0	1	0	0	0	0	0	0	0	0	3	2	3
35-44	Urban	Middle	Not Employed	Employed	More female babies	More than 6 years	50,000 – 1 lac PKR	With Spouse’s extended family	9 months	Female	C- section	Government hospital	No	Yes	Yes	4	3	1	7	6	7	2	2	3	7	0	0	1	1	3	3	3	3	3	3	1	0	0	0	0	0	0	0	0	0	0	3	2	3
35-44	Rural	Primary	Not Employed	Employed	More female babies	2 to 6 years	50,000 – 1 lac PKR	With Spouse’s extended family	9 months	male	C- section	Government hospital	No	Yes	Yes	3	2	1	3	2	3	2	2	3	2	3	0	0	1	3	0	3	1	3	2	1	0	0	0	0	0	0	0	0	0	1	1	2	2
35-44	Urban	High School	Not Employed	Not Employed	More female babies	More than 6 years	26,000 – 50,000	With Spouse’s extended family	Less than 9 months	Female	C- section	Government hospital	No	No	Yes	2	6	4	1	5	3	1	4	4	3	3	3	3	3	3	3	3	3	3	3	1	0	0	0	0	0	0	0	0	0	0	3	2	2
35-44	Rural	Bachelors	Not Employed	Employed	Equal number of male and female babies	2 to 6 years	26,000 – 50,000	With Spouse’s extended family	9 months	Female	C- section	Government hospital	No	Yes	Yes	2	3	2	1	4	1	3	2	3	2	3	3	3	3	0	3	3	3	3	3	1	0	0	0	1	0	0	0	0	0	0	2	3	3
35-44	Urban	Primary	Not Employed	Not Employed	More female babies	More than 6 years	25,000 PKR or less	With Spouse’s extended family	Less than 9 months	male	C- section	Government hospital	No	No	Yes	2	3	4	5	6	7	3	2	5	1	3	2	1	3	2	1	1	1	2	2	1	1	1	1	0	0	0	0	0	0	0	3	3	2
26-34	Urban	No Formal education	Not Employed	Employed	Equal number of male and female babies	More than 6 years	26,000 – 50,000	With Spouse’s extended family	9 months	Female	C- section	Government hospital	No	No	Yes	1	2	3	2	1	3	1	2	3	3	2	0	2	1	3	3	2	3	3	2	1	0	0	0	0	0	0	0	0	0	0	3	2	1
26-34	Urban	Bachelors	Employed	Employed	Equal number of male and female babies	More than 6 years	26,000 – 50,000	Own house	9 months	male	C- section	Government hospital	No	No	Yes	2	3	1	3	2	1	1	2	7	4	3	3	3	3	3	3	2	3	3	3	1	1	0	0	0	0	0	0	0	0	1	3	2	3
35-44	Urban	High School	Employed	Employed	More female babies	More than 6 years	26,000 – 50,000	Own house	9 months	Female	C- section	Government hospital	No	No	Yes	1	2	3	1	2	3	1	3	1	3	2	1	3	3	3	3	3	3	3	3	1	1	0	0	0	0	0	0	0	0	0	3	2	3
35-44	Urban	No Formal education	Not Employed	Not Employed	More male babies	More than 6 years	25,000 PKR or less	With Spouse’s extended family	9 months	Female	C- section	Government hospital	No	No	Yes	2	3	1	1	3	2	3	3	1	3	3	0	3	2	1	0	3	2	3	1	1	0	0	0	0	0	0	0	1	0	1	2	3	2
35-44	Urban	No Formal education	Not Employed	Not Employed	More female babies	More than 6 years	26,000 – 50,000	Own house	9 months	male	C- section	Government hospital	No	Yes	Yes	2	3	1	2	3	1	2	3	1	3	3	3	3	3	2	3	2	1	3	2	1	0	0	0	0	0		0	0	1	0	3	3	3
26-34	Urban	Middle	Not Employed	Not Employed	Equal number of male and female babies	More than 6 years	25,000 PKR or less	Own house	Less than 9 months	male	C- section	Government hospital	No	No	Yes	1	2	3	4	5	4	3	1	4	4	3	3	3	1	3	1	3	3	1	1	1	0	0	1	0	0	0	0	0	0	1	2	0	0
16-25	Urban	Primary	Not Employed	Not Employed	More female babies	2 to 6 years	26,000 – 50,000	Own house	9 months	male	C- section	Government hospital	No	No	Yes	3	2	1	5	4	4	3	2	2	2	3	1	2	3	3	3	3	1	1	3	1	0	0	0	0	0	0	0	0	0	1	3	2	2
35-44	Urban	Masters or higher	Employed	Employed	More male babies	More than 6 years	50,000 – 1 lac PKR	Own house	9 months	Female	Simple Vaginal delivery (Normal)	Private hospital	No	No	Yes	2	3	5	1	2	3	2	3	3	1	3	1	1	3	1	3	3	2	3	0	1	0	0	0	0	0	0	1	0	0	0	3	2	2
16-25	Urban	Primary	Not Employed	Employed	Equal number of male and female babies	2 to 6 years	26,000 – 50,000	With Spouse’s extended family	9 months	Female	C- section	Government hospital	No	No	Yes	1	2	1	3	1	2	3	1	2	3	3	1	0	1	3	0	3	1	0	1	1	1	0	0	0	0	0	0	0	0	0	3	2	3
35-44	Urban	Primary	Not Employed	Employed	Equal number of male and female babies	2 to 6 years	26,000 – 50,000	With Spouse’s extended family	9 months	Female	C- section	Government hospital	No	No	Yes	1	2	3	1	2	3	1	2	3	2	3	3	2	3	3	1	3	3	3	3	1	0	0	0	0	0	0	0	1	0	1	3	2	3
16-25	Urban	Primary	Not Employed	Employed	More female babies	More than 6 years	26,000 – 50,000	With Spouse’s extended family	9 months	Female	C- section	Government hospital	No	Yes	Yes	3	2	1	1	3	2	1	2	3	1	2	1	3	3	3	3	3	1	3	3	1	1	0	1	0	0	0	0	0	0	0	3	2	2
16-25	Urban	Primary	Not Employed	Not Employed	More male babies	2 to 6 years	26,000 – 50,000	With Spouse’s extended family	9 months	male	C- section	Government hospital	Yes	No	Yes	6	3	2	3	3	3	2	1	2	3	3	3	3	3	3	1	0	1	1	2	1	0	0	0	0	0	0	0	0	0	0	3	3	2
16-25	Urban	No Formal education	Not Employed	Not Employed	More female babies	More than 6 years	25,000 PKR or less	Own house	9 months	Female	C- section	Government hospital	No	No	Yes	4	2	1	3	4	3	2	3	1	4	1	3	3	1	0	3	0	1	3	1	1	0	0	0	1	0	0	0	0	0	0	2	3	2
26-34	Urban	Bachelors	Not Employed	Employed	More female babies	2 to 6 years	26,000 – 50,000	Own house	9 months	Female	C- section	Government hospital	No	No	Yes	1	3	2	1	2	3	3	2	1	3	3	0	3	0	3	3	3	3	3	2	1	0	0	0	0	0	0	0	0	0	0	3	2	3
26-34	Urban	Primary	Not Employed	Not Employed	More female babies	More than 6 years	26,000 – 50,000	With Spouse’s extended family	9 months	Female	C- section	Government hospital	Yes	No	Yes	2	1	3	2	3	4	1	4	4	4	3	1	0	0	1	3	3	3	1	1	1	0	0	0	0	0	0	0	1	0	0	3	2	1
26-34	Urban	No Formal education	Not Employed	Not Employed	More female babies	2 to 6 years	26,000 – 50,000	With Spouse’s extended family	9 months	Female	C- section	Government hospital	No	No	Yes	2	3	1	1	2	3	4	4	4	1	3	0	3	0	3	3	3	1	3	0	1	0	1	0	0	0	0	0	0	0	1	3	2	3
35-44	Rural	No Formal education	Not Employed	Not Employed	Equal number of male and female babies	More than 6 years	25,000 PKR or less	With Spouse’s extended family	9 months	male	C- section	Government hospital	No	No	Yes	2	3	1	3	2	1	2	3	1	3	3	3	1	3	1	0	3	3	3	3	1	0	0	0	1	0	0	0	0	0	1	2	3	3
16-25	Urban	Primary	Not Employed	Employed	More male babies	More than 6 years	25,000 PKR or less	With Spouse’s extended family	9 months	male	Simple Vaginal delivery (Normal)	Government hospital	Yes	No	Yes	2	3	4	1	3	2	4	3	2	1	3	0	3	0	3	0	3	3	1	1	1	1	0	0	0	0	0	0	0	0	0	3	2	3
26-34	Urban	Middle	Employed	Employed	Equal number of male and female babies	More than 6 years	25,000 PKR or less	With Spouse’s extended family	9 months	male	Simple Vaginal delivery (Normal)	Government hospital	No	No	Yes	2	1	3	1	2	3	4	4	6	4	3	3	2	1	0	3	3	3	2	3	1	0	0	0	0	0	0	0	0	0	0	2	3	2
26-34	Urban	Primary	Not Employed	Employed	More female babies	More than 6 years	26,000 – 50,000	With Spouse’s extended family	9 months	Female	C- section	Private hospital	No	No	Yes	1	6	1	3	4	3	2	1	3	3	3	3	3	3	3	3	3	3	3	0	1	0	0	0	0	0	0	0	0	0	0	3	2	2
35-44	Urban	Primary	Not Employed	Not Employed	More female babies	More than 6 years	26,000 – 50,000	With Spouse’s extended family	9 months	Female	C- section	Private hospital	Yes	No	Yes	4	4	3	4	5	5	2	2	3	5	3	3	0	3	0	3	3	3	3	3	1	0	1	0	0	0	0	0	0	0	0	3	2	3
35-44	Urban	No Formal education	Not Employed	Employed	More female babies	More than 6 years	50,000 – 1 lac PKR	Own house	9 months	male	Simple Vaginal delivery (Normal)	Home	Yes	No	Yes	6	7	6	5	6	7	6	7	7	6	0	0	3	3	3	3	3	3	1	1	1	1	0	1	0	0	0	0	0	0	0	3	2	3
26-34	Urban	Primary	Not Employed	Employed	More female babies	More than 6 years	26,000 – 50,000	Own house	Less than 9 months	Female	C- section	Government hospital	No	No	Yes	3	1	2	2	3	4	5	4	3	3	3	1	3	0	0	3	3	1	3	3	1	0	0	0	0	0	0	1	0	0	0	3	2	2
35-44	Urban	Middle	Not Employed	Employed	Equal number of male and female babies	2 to 6 years	26,000 – 50,000	With Spouse’s extended family	9 months	Female	C- section	Government hospital	No	No	Yes	1	3	2	3	2	1	1	2	5	3	3	1	3	0	3	0	3	3	3	1	1	1	0	0	0	0	0	0	0	0	1	2	3	2
35-44	Urban	Primary	Not Employed	Not Employed	More female babies	More than 6 years	26,000 – 50,000	With Spouse’s extended family	9 months	Female	C- section	Government hospital	No	No	Yes	2	6	3	4	4	3	2	3	3	2	3	0	3	1	1	3	1	1	3	1	1	0	0	0	0	0	0	0	0	0	1	3	2	3
26-34	Urban	Primary	Not Employed	Employed	More female babies	More than 6 years	26,000 – 50,000	With Spouse’s extended family	9 months	Female	C- section	Government hospital	No	No	Yes	3	6	7	3	3	3	3	4	3	3	0	3	3	3	0	3	3	1	3	0	1	1	0	0	0	0	0	0	0	0	0	3	2	3
35-44	Urban	Bachelors	Not Employed	Not Employed	More female babies	More than 6 years	25,000 PKR or less	With Spouse’s extended family	9 months	Female	C- section	Government hospital	No	No	Yes	2	7	3	7	4	3	2	4	7	3	2	1	3	1	3	3	1	3	3	3	1	1	0	0	0	0	0	0	0	0	0	3	2	3
35-44	Urban	Primary	Not Employed	Employed	More female babies	More than 6 years	26,000 – 50,000	With Spouse’s extended family	Less than 9 months	Female	C- section	Government hospital	No	No	Yes	2	4	6	4	3	3	4	4	3	3	3	1	1	3	3	0	3	1	1	1	1	0	0	0	0	0	0	0	0	0	0	3	2	2
16-25	Urban	Primary	Not Employed	Employed	More male babies	More than 6 years	26,000 – 50,000	With Spouse’s extended family	Less than 9 months	male	C- section	Government hospital	No	No	Yes	2	6	6	3	3	4	6	3	4	3	3	0	1	1	0	0	3	3	3	0	1	0	0	0	1	0	0	0	0	0	0	3	2	2
35-44	Urban	Middle	Not Employed	Employed	More male babies	2 to 6 years	25,000 PKR or less	Own house	Less than 9 months	male	C- section	Government hospital	No	No	Yes	2	3	4	3	4	3	2	2	3	4	3	0	3	3	3	3	1	1	3	2	1	0	0	0	0	0	0	0	0	0	0	0	3	3
35-44	Rural	Primary	Not Employed	Not Employed	More female babies	More than 6 years	25,000 PKR or less	With Spouse’s extended family	9 months	Female	C- section	Government hospital	No	No	Yes	2	6	6	3	4	4	1	1	6	1	3	3	0	0	3	3	3	3	1	3	1	1	0	1	0	0	0	0	0	0	0	3	3	2
26-34	Urban	Primary	Not Employed	Not Employed	More male babies	More than 6 years	25,000 PKR or less	Own house	Less than 9 months	male	C- section	Government hospital	No	Yes	Yes	2	7	7	6	7	7	6	7	7	7	3	3	1	0	3	1	3	1	0	3	1	1	0	0	0	0	0	0	0	0	0	2	3	3
16-25	Urban	No Formal education	Not Employed	Not Employed	More male babies	More than 6 years	25,000 PKR or less	With Spouse’s extended family	9 months	Female	C- section	Government hospital	No	No	Yes	3	7	6	5	1	4	6	5	7	4	3	1	0	1	0	0	3	3	3	3	1	1	0	0	0	0	0	0	0	0	0	0	2	3
26-34	Urban	Primary	Not Employed	Not Employed	More female babies	More than 6 years	25,000 PKR or less	With Spouse’s extended family	9 months	Female	C- section	Government hospital	No	No	Yes	2	3	2	7	6	5	7	6	5	6	3	1	0	3	3	3	1	0	3	3	1	0	0	0	0	0	0	0	0	0	0	3	2	1
35-44	Rural	No Formal education	Not Employed	Employed	No babies	2 to 6 years	26,000 – 50,000	With Spouse’s extended family	9 months	Female	Simple Vaginal delivery (Normal)	Government hospital	No	No	Yes	3	2	1	7	4	4	7	6	7	3	3	3	2	2	3	3	1	3	3	0	1	1	0	0	0	0	0	0	0	0	1	2	1	3
26-34	Urban	High School	Not Employed	Not Employed	More female babies	2 to 6 years	26,000 – 50,000	With Spouse’s extended family	Less than 9 months	male	C- section	Government hospital	No	No	Yes	2	3	7	6	6	4	1	2	7	2	3	3	0	3	3	3	3	3	1	0	1	1	0	0	0	0	0	0	0	0	1	3	1	2
26-34	Urban	Primary	Not Employed	Not Employed	More female babies	More than 6 years	25,000 PKR or less	Own house	Less than 9 months	male	C- section	Government hospital	No	No	Yes	2	4	3	1	4	2	1	4	3	3	1	3	3	0	0	1	0	3	3	0	1	0	0	0	0	0	0	1	0	0	1	2	3	2
26-34	Urban	Primary	Not Employed	Employed	More male babies	More than 6 years	26,000 – 50,000	With Spouse’s extended family	Less than 9 months	male	C- section	Government hospital	Yes	No	Yes	3	2	1	5	4	1	6	2	5	4	3	0	1	1	3	3	2	1	1	0	1	0	0	0	0	0	0	0	0	0	0	3	2	2
35-44	Urban	Primary	Not Employed	Employed	More female babies	More than 6 years	26,000 – 50,000	With Spouse’s extended family	9 months	Female	C- section	Government hospital	No	No	Yes	2	6	7	6	7	6	7	6	7	7	3	1	0	0	0	3	3	0	3	1	1	0	0	0	1	0	0	0	0	0	0	3	1	3
35-44	Urban	Primary	Not Employed	Not Employed	More female babies	More than 6 years	25,000 PKR or less	With Spouse’s extended family	Less than 9 months	Female	C- section	Government hospital	No	No	Yes	2	1	3	6	7	7	6	7	6	6	0	0	3	0	3	3	3	0	3	0	1	1	0	0	0	0	0	0	0	0	1	2	3	1
35-44	Rural	Middle	Employed	Employed	More male babies	2 to 6 years	26,000 – 50,000	With Spouse’s extended family	9 months	Female	C- section	Government hospital	No	No	Yes	7	6	6	7	6	7	7	6	6	7	3	3	3	3	1	1	3	3	3	3	1	0	1	0	0	0	0	0	0	0	0	0	3	2
35-44	Urban	Primary	Employed	Not Employed	Equal number of male and female babies	More than 6 years	26,000 – 50,000	With Spouse’s extended family	9 months	male	C- section	Government hospital	No	No	Yes	1	6	7	6	1	1	6	4	6	7	3	1	0	3	3	1	3	3	0	3	1	0	0	1	0	0	0	0	0	0	1	3	2	2
35-44	Urban	Middle	Employed	Employed	More female babies	2 to 6 years	26,000 – 50,000	Own house	Less than 9 months	Female	C- section	Government hospital	No	No	Yes	6	7	6	6	7	7	6	7	6	7	3	0	3	0	1	0	3	3	2	2	1	0	0	0	0	0	0	0	0	0	1	3	2	1
26-34	Urban	Middle	Not Employed	Employed	More male babies	More than 6 years	26,000 – 50,000	With Spouse’s extended family	9 months	male	C- section	Government hospital	Yes	Yes	Yes	7	6	4	7	4	6	7	7	6	7	2	1	2	3	0	1	1	3	3	1	1	0	0	0	0	0	0	0	0	0	1	2	3	1
26-34	Urban	Bachelors	Employed	Employed	More male babies	2 to 6 years	50,000 – 1 lac PKR	Own house	9 months	male	C- section	Private hospital	No	Yes	Yes	7	6	3	7	7	4	4	4	7	1	3	3	3	3	3	1	3	3	3		1	0	0	1	0	0	0	0	0	0	0	2	3	1
26-34	Urban	Masters or higher	Employed	Employed	More female babies	More than 6 years	26,000 – 50,000	With Spouse’s extended family	9 months	Female	C- section	Government hospital	No	No	Yes	3	2	6	3	4	1	6	3	6	3	1	3	0	3	3	3	0	0	0	0	1	0	0	0	0	0	0	0	0	0	1	3	2	3
35-44	Urban	Middle	Not Employed	Not Employed	More female babies	More than 6 years	25,000 PKR or less	With Spouse’s extended family	9 months	Female	Simple Vaginal delivery (Normal)	Government hospital	No	No	Yes	3	2	6	3	4	1	6	3	6	3	3	3	3	1	3	1	3	1	0	0	1	0	0	0	0	0	0	0	0	0	0	2	0	3
26-34	Urban	Primary	Not Employed	Employed	More male babies	More than 6 years	26,000 – 50,000	Own house	Less than 9 months	male	C- section	Government hospital	No	No	Yes	3	2	3	6	4	1	6	3	6	3	3	3	2	3	3	3	3	0	3	3	1	0	0	0	1	0	1	0	0	0	0	3	2	3
16-25	Urban	Bachelors	Not Employed	Not Employed	More male babies	More than 6 years	25,000 PKR or less	With Spouse’s extended family	9 months	male	C- section	Government hospital	Yes	No	Yes	3	2	6	3	4	1	6	3	6	3	3	0	0	3	3	3	3	0	0	2	1	0	0	1	0	0	0	0	0	0	1	0	1	2
35-44	Urban	No Formal education	Not Employed	Not Employed	More male babies	More than 6 years	25,000 PKR or less	With Spouse’s extended family	Less than 9 months	male	C- section	Private hospital	Yes	Yes	Yes	1	2	4	2	7	7	7	7	4	7	0	0	3	2	3	3	3	3	1	3	1	0	1	0	0	0	0	0	0	0	0	3	3	2
26-34	Urban	Bachelors	Not Employed	Employed	More female babies	More than 6 years	25,000 PKR or less	Own house	9 months	male	C- section	Government hospital	No	No	Yes	1	1	1	2	1	1	2	7	6	7	3	3	1	1	3	1	3	3	3	0	1	0	0	1	0	0	0	0	0	0	0	3	3	3
26-34	Urban	No Formal education	Not Employed	Not Employed	More female babies	More than 6 years	26,000 – 50,000	Own house	9 months	Female	C- section	Government hospital	No	No	Yes	5	1	2	3	5	2	7	3	2	3	1	3	3	3	3	3	3	3	0	1	1	0	1	0	0	0	0	0	0	0	1	3	2	3
16-25	Urban	Masters or higher	Not Employed	Employed	Equal number of male and female babies	More than 6 years	26,000 – 50,000	With Spouse’s extended family	9 months	Female	C- section	Government hospital	No	No	Yes	1	2	3	3	3	3	1	7	6	1	3	1	3	0	0	0	2	3	1	0	1	0	0	0	0	0	0	0	0	1	0	0	3	3
35-44	Urban	Bachelors	Not Employed	Not Employed	More female babies	More than 6 years	26,000 – 50,000	With Spouse’s extended family	Less than 9 months	Female	C- section	Government hospital	No	No	Yes	7	6	7	6	6	7	6	6	7	7	3	3	2	3	3	1	2	2	1	0	1	0	0	0	1	0	0	0	0	0	1	0	0	0
35-44	Urban	Primary	Not Employed	Not Employed	More male babies	More than 6 years	26,000 – 50,000	With Spouse’s extended family	9 months	Female	C- section	Government hospital	No	Yes	Yes	4	7	1	2	3	1	2	3	7	4	3	0	3	0	3	3	3	3	3	3	1	1	0	0	0	0	0	0	0	0	0	2	3	3
26-34	Urban	Primary	Not Employed	Employed	More male babies	More than 6 years	26,000 – 50,000	Own house	9 months	Female	Simple Vaginal delivery (Normal)	Government hospital	No	No	Yes	1	2	1	2	3	2	1	3	2	1	3	1	2	3	2	3	3	1	3	3	1	0	1	0	0	0	0	0	0	0	1	2	2	3
26-34	Urban	Primary	Not Employed	Employed	More female babies	More than 6 years	25,000 PKR or less	With Spouse’s extended family	9 months	Female	Simple Vaginal delivery (Normal)	Private hospital	No	No	Yes	2	1	2	1	2	3	2	3	1	2	3	3	3	3	3	3	3	0	0	0	1	0	0	0	0	0	0	0	0	0	1	3	2	3
26-34	Urban	High School	Not Employed	Employed	More female babies	2 to 6 years	25,000 PKR or less	With Spouse’s extended family	9 months	Female	C- section	Government hospital	No	Yes	Yes	2	3	6	6	7	6	7	7	1	6	1	1	1	3	1	3	1	1	3	3	1	0	1	0	0	0	0	0	0	0	0	3	2	3
26-34	Urban	Primary	Not Employed	Employed	More male babies	More than 6 years	26,000 – 50,000	With Spouse’s extended family	9 months	Female	Simple Vaginal delivery (Normal)	Private hospital	No	No	Yes	4	4	4	4	4	4	4	4	4	4	3	1	0	2	2	3	3	0	3	1	1	0	0	0	0	0	0	0	0	0	1	0	2	1
26-34	Urban	Middle	Not Employed	Not Employed	More female babies	More than 6 years	26,000 – 50,000	With Spouse’s extended family	9 months	male	C- section	Private hospital	No	No	Yes	1	6	7	3	4	2	2	7	2	1	3	0	2	0	3	1	1	3	2	0	1	0	0	0	0	0	0	0	0	0	1	0	1	1
26-34	Urban	Middle	Not Employed	Not Employed	More male babies	More than 6 years	26,000 – 50,000	With Spouse’s extended family	Less than 9 months	male	Simple Vaginal delivery (Normal)	Government hospital	No	No	Yes	7	6	5	7	5	6	5	6	5	7	3	1	0	1	0	0	1	3	3	0	1	1	1	0	0	0	0	0	0	0	0	3	3	2
16-25	Rural	Primary	Not Employed	Employed	More male babies	2 to 6 years	26,000 – 50,000	With Spouse’s extended family	Less than 9 months	male	Simple Vaginal delivery (Normal)	Private hospital	Yes	No	Yes	2	3	7	6	4	4	6	1	7	7	1	1	3	0	2	3	3	1	2	2	1	0	0	0	0	0	0	0	0	0	0	0	2	2
26-34	Urban	Bachelors	Not Employed	Employed	More female babies	2 to 6 years	50,000 – 1 lac PKR	With Spouse’s extended family	Less than 9 months	male	Simple Vaginal delivery (Normal)	Private hospital	No	No	Yes	7	7	7	7	7	7	7	7	7	7	1	3	2	3	3	3	3	1	3	1	1	1	0	0	1	0	0	0	0	0	0	2	3	3
26-34	Urban	Primary	Not Employed	Employed	More female babies	More than 6 years	25,000 PKR or less	With Spouse’s extended family	9 months	Female	Simple Vaginal delivery (Normal)	Government hospital	No	No	Yes	4	1	2	3	3	1	1	1	1	2	3	0	3	3	3	3	3	0	0	0	1	0	0	0	0	0	0	0	1	0	0	0	0	3
35-44	Urban	High School	Not Employed	Not Employed	More female babies	More than 6 years	26,000 – 50,000	With Spouse’s extended family	Less than 9 months	Female	C- section	Government hospital	No	No	Yes	7	2	7	2	1	2	4	4	2	1	3	1	1	3	1	1	3	0	3	0	1	0	0	0	0	0	0	0	0	0	0	1	1	3
26-34	Urban	Primary	Not Employed	Employed	More male babies	2 to 6 years	26,000 – 50,000	With Spouse’s extended family	9 months	Female	C- section	Government hospital	No	No	Yes	2	6	4	4	3	3	4	3	6	4	0	1	3	3	0	2	3	3	0	0	1	0	0	0	0	0	0	0	0	0	1	3	1	3
26-34	Urban	Bachelors	Employed	Not Employed	More female babies	2 to 6 years	25,000 PKR or less	With Spouse’s extended family	9 months	Female	C- section	Government hospital	No	Yes	Yes	3	2	6	3	4	1	6	3	6	3	3	3	1	3	3	3	3	3	0	0	1	0	0	0	1	0	0	0	0	0	0	1	2	2
26-34	Urban	High School	Not Employed	Employed	More male babies	More than 6 years	25,000 PKR or less	With Spouse’s extended family	Less than 9 months	Female	C- section	Government hospital	No	No	Yes	2	3	5	2	1	1	2	4	7	2	3	1	0	1	3	1	1	1	1	3	1	0	0	0	0	0	0	0	0	0	1	3	0	3
26-34	Urban	Middle	Not Employed	Employed	More female babies	More than 6 years	26,000 – 50,000	With Spouse’s extended family	9 months	Female	C- section	Government hospital	No	No	Yes	3	6	6	3	4	3	4	1	3	3	3	3	1	1	0	3	1	3	3	3	1	0	0	0	0	0	0	0	0	0	0	1	3	3
26-34	Urban	No Formal education	Not Employed	Employed	Equal number of male and female babies	2 to 6 years	26,000 – 50,000	With Spouse’s extended family	9 months	Female	Simple Vaginal delivery (Normal)	Government hospital	No	Yes	Yes	7	6	6	7	6	4	7	7	6	6	0	1	2	2	3	1	2	3	3	3	1	1	0	0	0	0	0	0	0	0	0	3	1	2
26-34	Urban	Middle	Not Employed	Employed	More female babies	More than 6 years	26,000 – 50,000	With Spouse’s extended family	9 months	Female	C- section	Private hospital	No	No	Yes	3	2	2	6	7	7	1	2	7	4	3	3	2	1	3	3	3	3	1	3	1	1	0	0	0	0	0	0	0	0	0	0	3	2
26-34	Urban	Primary	Not Employed	Not Employed	More female babies	More than 6 years	26,000 – 50,000	With Spouse’s extended family	Less than 9 months	Female	Simple Vaginal delivery (Normal)	Government hospital	No	No	Yes	1	3	6	7	6	4	4	1	7	2	3	1	1	3	3	3	1	3	1	3	1	0	0	0	0	0	0	0	0	0	0	0	0	2
16-25	Urban	No Formal education	Not Employed	Not Employed	More female babies	More than 6 years	26,000 – 50,000	With Spouse’s extended family	9 months	Female	C- section	Government hospital	No	No	Yes	6	1	2	7	4	4	6	4	5	4	3	3	3	3	1	3	0	3	0	0	1	0	1	0	0	0	0	0	0	0	0	3	2	2
26-34	Urban	Middle	Not Employed	Employed	More female babies	Less than one year	26,000 – 50,000	With Spouse’s extended family	9 months	Female	Simple Vaginal delivery (Normal)	Government hospital	Yes	No	Yes	1	7	2	4	4	4	2	6	4	4	3	1	2	1	3	2	3	0	3	3	1	0	0	1	0	0	0	0	0	0	1	3	2	0
26-34	Urban	High School	Not Employed	Not Employed	More female babies	More than 6 years	26,000 – 50,000	With Spouse’s extended family	Less than 9 months	Female	C- section	Government hospital	No	No	Yes	3	2	6	2	6	4	4	4	2	4	3	3	2	3	2	3	3	0	2	3	1	0	0	0	0	0	0	0	0	0	0	2	3	1
16-25	Urban	Primary	Not Employed	Employed	More male babies	2 to 6 years	26,000 – 50,000	With Spouse’s extended family	9 months	Female	C- section	Government hospital	No	No	Yes	3	2	1	2	4	5	3	3	1	2	1	0	0	3	3	3	3	3	3	3	1	0	0	0	0	0	0	0	0	0	1	0	0	0
26-34	Urban	No Formal education	Not Employed	Employed	More male babies	More than 6 years	25,000 PKR or less	With Spouse’s extended family	Less than 9 months	male	C- section	Government hospital	No	Yes	Yes	3	2	1	2	1	3	6	1	3	1	3	0	3	0	1	1	3	0	3	3	1	0	0	0	0	0	0	0	0	0	1	3	3	3
26-34	Urban	High School	Not Employed	Employed	More female babies	2 to 6 years	25,000 PKR or less	With Spouse’s extended family	9 months	Female	C- section	Government hospital	No	Yes	Yes	1	7	1	7	4	4	4	4	4	1	0	0	0	0	3	3	3	3	3	3	1	0	0	0	0	0	0	0	0	0	1	0	3	2
16-25	Rural	Bachelors	Not Employed	Employed	More female babies	2 to 6 years	25,000 PKR or less	Own house	Less than 9 months	Female	C- section	Government hospital	No	No	Yes	3	6	1	6	4	3	1	2	2	1	2	3	3	0	3	3	3	0	3	3	1	0	0	0	0	0	0	0	0	0	1	2	0	3
26-34	Urban	No Formal education	Not Employed	Not Employed	More male babies	More than 6 years	26,000 – 50,000	With Spouse’s extended family	Less than 9 months	Female	C- section	Government hospital	No	No	Yes	2	6	7	6	4	4	7	6	7	6	1	0	0	1	3	1	3	3	3	0	1	0	0	0	0	0	0	0	0	0	1	3	2	1
26-34	Urban	Middle	Not Employed	Employed	More female babies	2 to 6 years	26,000 – 50,000	With Spouse’s extended family	9 months	Female	C- section	Government hospital	Yes	No	Yes	7	6	3	4	4	4	3	4	2	4	2	3	3	1	1	2	2	3	1	0	1	1	0	0	0	0	0	0	0	0	0	0	3	3
26-34	Urban	No Formal education	Not Employed	Not Employed	More male babies	More than 6 years	26,000 – 50,000	Own house	9 months	male	C- section	Government hospital	No	No	Yes	3	2	3	2	4	4	7	4	7	4	1	0	0	3	3	1	3	1	2	3	1	0	0	0	0	0	0	0	0	0	1	2	3	2
45+	Urban	No Formal education	Employed	Employed	More male babies	2 to 6 years	26,000 – 50,000	Own house	9 months	male	C- section	Government hospital	No	No	Yes	1	2	6	2	3	2	3	3	2	4	3	3	1	3	3	0	2	2	2	2	1	0	0	0	0	0	0	0	0	0	1	3	1	1
35-44	Urban	No Formal education	Not Employed	Employed	Equal number of male and female babies	2 to 6 years	25,000 PKR or less	With Spouse’s extended family	9 months	male	Simple Vaginal delivery (Normal)	Government hospital	No	No	Yes	3	2	6	3	4	1	6	3	6	3	1	0	3	3	3	0	3	3	1	3	1	0	0	0	0	0	0	0	0	0	0	3	2	2
26-34	Urban	Primary	Not Employed	Not Employed	More male babies	2 to 6 years	25,000 PKR or less	With Spouse’s extended family	9 months	Female	C- section	Government hospital	No	No	Yes	3	4	4	3	4	4	1	2	3	2	3	3	3	1	3	2	3	3	3	3	1	0	0	0	0	0	0	0	0	0	1	2	3	1
26-34	Urban	Middle	Not Employed	Employed	More female babies	2 to 6 years	26,000 – 50,000	With Spouse’s extended family	9 months	Female	C- section	Government hospital	No	No	Yes	3	2	3	1	3	2	1	3	2	1	3	3	1	1	1	1	1	3	3	3	1	0	0	0	0	0	0	0	0	0	0	3	2	3
26-34	Urban	Middle	Not Employed	Employed	Equal number of male and female babies	More than 6 years	26,000 – 50,000	With Spouse’s extended family	9 months	Female	C- section	Government hospital	No	No	Yes	3	2	1	2	3	1	2	3	2	3	3	0	3	2	3	3	3	1	3	3	1	0	0	0	0	0	0	0	0	0	0	2	3	1
26-34	Urban	No Formal education	Not Employed	Employed	More male babies	2 to 6 years	25,000 PKR or less	With Spouse’s extended family	9 months	male	Simple Vaginal delivery (Normal)	Government hospital	No	No	Yes	3	2	3	1	1	2	1	3	3	3	2	3	3	0	3	3	3	0	3	3	1	1	0	0	0	0	0	0	0	0	0	2	1	3
35-44	Rural	Bachelors	Employed	Employed	More female babies	More than 6 years	26,000 – 50,000	With Spouse’s extended family	9 months	Female	C- section	Government hospital	No	No	Yes	2	3	2	7	7	1	2	3	7	1	3	1	0	0	3	3	2	3	3	1	1	0	0	0	0	0	0	0	0	0	1	2	3	2
26-34	Urban	Primary	Not Employed	Employed	More male babies	2 to 6 years	26,000 – 50,000	With Spouse’s extended family	9 months	Female	C- section	Government hospital	No	No	Yes	2	1	3	3	4	1	4	4	6	3	3	3	3	0	3	0	3	2	1	2	1	0	0	1	0	0	0	0	0	0	0	3	0	3
26-34	Urban	Primary	Not Employed	Not Employed	More female babies	More than 6 years	26,000 – 50,000	With Spouse’s extended family	Less than 9 months	male	C- section	Government hospital	No	No	Yes	4	6	4	3	4	4	2	1	2	3	3	3	2	1	0	3	2	1	3	3	1	1	0	0	0	0	0	0	0	0	1	3	2	3
16-25	Urban	Middle	Not Employed	Employed	No babies	More than 6 years	26,000 – 50,000	Own house	Less than 9 months	Female	C- section	Government hospital	No	No	Yes	1	7	1	6	2	2	1	2	7	2	3	0	2	0	3	3	0	3	3	1	1	0	0	0	0	0	0	0	0	0	0	2	3	0
26-34	Urban	Middle	Not Employed	Employed	More female babies	More than 6 years	25,000 PKR or less	With Spouse’s extended family	9 months	Female	C- section	Government hospital	No	No	Yes	2	6	4	7	6	6	3	6	1	7	2	1	2	3	2	3	0	0	3	1	1	0	1	0	0	0		0	0	0	0	3	0	2
16-25	Rural	Primary	Not Employed	Employed	More female babies	2 to 6 years	26,000 – 50,000	With Spouse’s extended family	9 months	Female	Simple Vaginal delivery (Normal)	Government hospital	No	No	Yes	6	3	2	7	7	1	6	1	6	4	0	2	3	1	1	3	1	1	0	3	1	0	0	0	0	0	0	0	0	0	1	2	0	3
26-34	Urban	Middle	Not Employed	Not Employed	More female babies	2 to 6 years	26,000 – 50,000	Own house	9 months	Female	C- section	Government hospital	No	No	Yes	3	2	6	3	4	1	6	5	6	3	1	3	0	3	3	0	1	1	0	0	1	0	0	0	0	0	0	0	0	0	0	1	3	0
26-34	Urban	Bachelors	Not Employed	Not Employed	More female babies	More than 6 years	26,000 – 50,000	With Spouse’s extended family	9 months	Female	C- section	Government hospital	No	No	Yes	2	3	6	7	4	3	6	2	7	3	0	3	0	3	0	3	0	3	0	2	1	0	0	0	0	0	0	0	0	0	1	2	0	3
26-34	Urban	Primary	Not Employed	Employed	More female babies	More than 6 years	26,000 – 50,000	With Spouse’s extended family	9 months	Female	C- section	Government hospital	Yes	No	Yes	1	2	3	2	3	1	3	2	1	3	1	2	1	1	0	2	1	3	1	0	1	0	0	1	0	0	0	0	0	0	0	0	1	0
26-34	Urban	Bachelors	Not Employed	Employed	More male babies	Less than one year	26,000 – 50,000	With Spouse’s extended family	9 months	male	C- section	Government hospital	Yes	No	Yes	2	3	1	3	4	1	3	1	2	4	1	1	3	1	3	2	3	0	0	0	1	0	0	0	0	0	0	0	0	1	0	2	1	1
35-44	Rural	High School	Not Employed	Employed	More female babies	More than 6 years	26,000 – 50,000	With Spouse’s extended family	Less than 9 months	Female	Simple Vaginal delivery (Normal)	Government hospital	No	No	Yes	3	2	3	1	4	3	1	2	3	4	3	3	3	0	1	3	0	1	0	0	1	0	0	0	0	0	0	0	0	0	0	0	2	3
35-44	Rural	No Formal education	Not Employed	Employed	More female babies	More than 6 years	26,000 – 50,000	With Spouse’s extended family	9 months	Female	C- section	Government hospital	No	No	Yes	6	7	6	7	6	7	1	6	7	6	3	3	0	3	3	1	0	1	3	3	1	0	0	0	0	0	0	0	0	0	0	1	3	1
26-34	Urban	Primary	Not Employed	Employed	More male babies	2 to 6 years	26,000 – 50,000	With Spouse’s extended family	9 months	Female	Simple Vaginal delivery (Normal)	Government hospital	No	No	Yes	3	4	2	4	6	7	4	5	7	6	3	0	3	3	1	2	3	0	0	0	1	0	0	0	0	0	0	0	0	1	0	0	2	3
26-34	Urban	Bachelors	Employed	Not Employed	More female babies	2 to 6 years	26,000 – 50,000	With Spouse’s extended family	9 months	Female	C- section	Government hospital	No	Yes	Yes	7	6	4	7	6	6	2	6	6	1	3	3	0	0	3	1	3	1	3	0	1	0	1	0	0	0	0	0	0	0	0	3	2	0
35-44	Urban	No Formal education	Not Employed	Not Employed	More female babies	2 to 6 years	26,000 – 50,000	With Spouse’s extended family	9 months	Female	C- section	Government hospital	No	No	Yes	4	6	7	4	4	4	6	4	6	7	3	0	3	0	0	3	3	1	3	0	1	0	0	0	0	0	0	0	0	0	0	3	2	1
26-34	Urban	No Formal education	Not Employed	Employed	No babies	2 to 6 years	25,000 PKR or less	Own house	9 months	Female	C- section	Government hospital	No	No	Yes	2	3	1	2	1	3	3	4	2	1	3	3	3	3	3	3	3	1	3	1	1	0	1	0	0	0	0	0	0	0	0	3	2	1
26-34	Urban	No Formal education	Not Employed	Not Employed	More female babies	More than 6 years	25,000 PKR or less	With Spouse’s extended family	Less than 9 months	Female	Simple Vaginal delivery (Normal)	Private hospital	No	No	Yes	1	3	6	3	4	4	6	4	4	4	3	0	3	3	3	3	0	3	3	2	1	0	0	0	0	0	0	0	0	0	0	3	2	1
26-34	Urban	Primary	Not Employed	Not Employed	More male babies	More than 6 years	26,000 – 50,000	With Spouse’s extended family	9 months	Female	C- section	Government hospital	No	No	Yes	7	6	4	3	4	1	4	4	5	2	1	3	1	0	3	1	3	0	0	3	1	0	1	0	0	0	0	0	0	0	0	2	3	1
26-34	Urban	Primary	Not Employed	Not Employed	More male babies	2 to 6 years	26,000 – 50,000	With Spouse’s extended family	9 months	male	C- section	Government hospital	Yes	No	Yes	7	1	2	4	2	4	7	6	2	4	3	3	0	2	3	1	3	0	0	1	1	1	0	0	0	0	0	0	0	0	1	3	2	1
35-44	Urban	Bachelors	Employed	Not Employed	Equal number of male and female babies	More than 6 years	26,000 – 50,000	With Spouse’s extended family	9 months	Female	Simple Vaginal delivery (Normal)	Government hospital	No	No	Yes	4	6	3	6	4	3	6	2	3	4	0	1	1	3	3	3	3	3	0	3	1	0	0	0	0	0	0	0	0	0	0	2	3	2
35-44	Urban	No Formal education	Not Employed	Not Employed	Equal number of male and female babies	More than 6 years	26,000 – 50,000	With Spouse’s extended family	9 months	Female	C- section	Government hospital	No	No	Yes	4	2	3	6	7	6	7	6	7	1	1	1	3	3	3	1	3	3	3	3	1	0	0	0	0	0	0	0	0	0	0	3	2	3
26-34	Urban	Bachelors	Not Employed	Employed	More male babies	More than 6 years	25,000 PKR or less	Own house	Less than 9 months	Female	C- section	Government hospital	No	Yes	Yes	2	3	1	3	1	3	1	3	7	2	3	0	0	3	3	1	3	1	3	1	1	0	0	0	0	0	0	0	0	1	1	1	3	3
26-34	Urban	Bachelors	Not Employed	Employed	More male babies	More than 6 years	26,000 – 50,000	With Spouse’s extended family	Less than 9 months	Female	C- section	Government hospital	No	No	Yes	7	6	3	7	6	1	7	6	4	6	3	3	3	1	3	3	3	1	1	0	1	1	0	0	0	0	0	0	0	0	0	0	0	3
26-34	Urban	Bachelors	Employed	Employed	More female babies	More than 6 years	50,000 – 1 lac PKR	With Spouse’s extended family	9 months	Female	C- section	Government hospital	No	No	Yes	7	6	2	1	3	7	6	7	1	7	3	1	1	3	1	0	3	3	0	3	1	1	0	0	0	0	0	0	0	0	0	0	1	0
26-34	Urban	Primary	Not Employed	Employed	Equal number of male and female babies	2 to 6 years	26,000 – 50,000	Own house	Less than 9 months	Female	C- section	Government hospital	Yes	Yes	Yes	6	6	7	1	7	6	2	7	1	4	3	0	3	3	0	3	1	3	0	3	1	1	0	0	0	0	0	0	0	0	0	3	2	1
16-25	Urban	No Formal education	Not Employed	Employed	No babies	More than 6 years	26,000 – 50,000	Own house	Less than 9 months	male	C- section	Government hospital	No	No	Yes	1	3	6	1	7	1	1	2	2	4	3	0	3	3	3	3	1	3	1	0	1	0	0	0	0	0	0	0	0	0	1	3	0	2
35-44	Urban	Bachelors	Not Employed	Not Employed	More female babies	More than 6 years	26,000 – 50,000	With Spouse’s extended family	9 months	Female	C- section	Government hospital	No	No	Yes	2	1	3	1	4	7	7	4	1	6	3	0	3	3	1	3	0	3	3	3	1	0	0	0	0	0	0	0	0	0	0	3	0	3
26-34	Urban	Primary	Not Employed	Not Employed	Equal number of male and female babies	More than 6 years	26,000 – 50,000	With Spouse’s extended family	9 months	Female	C- section	Government hospital	No	No	Yes	7	6	7	2	4	4	2	6	2	4	1	0	2	3	1	3	1	3	0	0	1	0	0	0	0	0	0	0	0	0	1	2	3	0
26-34	Urban	High School	Not Employed	Not Employed	More male babies	More than 6 years	26,000 – 50,000	With Spouse’s extended family	9 months	Female	C- section	Government hospital	No	No	Yes	1	6	2	5	2	6	3	2	6	2	2	0	0	3	1	1	3	1	0	2	1	1	0	0	0	0	0	1	0	0	0	0	1	2
26-34	Urban	Primary	Not Employed	Not Employed	Equal number of male and female babies	2 to 6 years	26,000 – 50,000	With Spouse’s extended family	9 months	Female	C- section	Government hospital	No	No	Yes	4	1	3	6	2	3	6	3	4	3	2	3	0	0	2	3	1	2	1	0	1	0	0	0	0	0	0	0	0	0	0	3	0	2
35-44	Urban	No Formal education	Not Employed	Employed	More female babies	More than 6 years	50,000 – 1 lac PKR	With Spouse’s extended family	Less than 9 months	Female	C- section	Government hospital	No	Yes	Yes	6	3	7	3	7	2	7	3	6	4	1	2	0	1	3	1	3	1	3	0	1	1	0	0	0	0	0	0	0	0	0	0	2	3
26-34	Urban	Middle	Employed	Not Employed	Equal number of male and female babies	More than 6 years	50,000 – 1 lac PKR	With Spouse’s extended family	Less than 9 months	male	C- section	Government hospital	No	No	Yes	2	1	6	2	7	3	1	6	7	4	3	3	2	3	3	1	1	3	1	1	1	0	0	0	0	0	0	0	0	0	0	2	3	1
26-34	Urban	Primary	Not Employed	Employed	Equal number of male and female babies	2 to 6 years	26,000 – 50,000	With Spouse’s extended family	9 months	Female	C- section	Government hospital	No	No	Yes	4	6	2	6	2	6	2	6	7	2	2	0	1	3	1	0	3	2	0	0	1	0	0	0	0	0	0	0	0	0	1	3	0	1
26-34	Urban	No Formal education	Not Employed	Employed	More female babies	More than 6 years	26,000 – 50,000	With Spouse’s extended family	Less than 9 months	Female	C- section	Government hospital	No	No	Yes	2	6	1	3	4	3	1	2	4	1	2	3	0	1	1	3	3	1	3	0	1	0	0	0	0	0	0	0	0	0	1	3	1	2
26-34	Urban	Primary	Not Employed	Employed	More female babies	More than 6 years	26,000 – 50,000	Own house	Less than 9 months	Female	C- section	Government hospital	No	No	Yes	5	3	2	5	4	1	4	6	2	1	3	0	1	3	3	0	3	1	3	1	1	0	0	0	0	0	0	0	0	0	1	3	2	0
26-34	Urban	Middle	Not Employed	Employed	More female babies	2 to 6 years	26,000 – 50,000	With Spouse’s extended family	9 months	Female	C- section	Government hospital	No	No	Yes	6	7	6	7	6	4	2	3	4	4	3	0	2	2	3	1	3	3	1	0	1	0	0	0	1	0	0	1	0	0	1	3	2	2
26-34	Urban	No Formal education	Not Employed	Not Employed	More male babies	More than 6 years	26,000 – 50,000	With Spouse’s extended family	9 months	Female	C- section	Government hospital	No	No	Yes	4	6	7	6	3	3	6	1	4	3	1	3	3	1	3	1	3	1	0	0	1	0	0	0	0	0	0	0	0	1	0	0	2	3
26-34	Urban	Bachelors	Not Employed	Employed	Equal number of male and female babies	2 to 6 years	26,000 – 50,000	With Spouse’s extended family	9 months	male	C- section	Government hospital	No	Yes	Yes	1	3	2	7	4	4	2	6	2	3	0	1	1	0	3	3	0	3	0	2	1	1	0	1	1	0	0	0	0	0	0	2	3	1
26-34	Urban	Bachelors	Not Employed	Not Employed	More female babies	Less than one year	26,000 – 50,000	With Spouse’s extended family	9 months	Female	C- section	Government hospital	No	No	Yes	6	2	6	4	2	4	6	3	2	2	3	2	0	0	1	3	2	3	3	0	1	0	0	0	1	0	0	0	0	0	1	3	3	2
35-44	Urban	Bachelors	Not Employed	Not Employed	Equal number of male and female babies	2 to 6 years	50,000 – 1 lac PKR	With Spouse’s extended family	9 months	Female	Simple Vaginal delivery (Normal)	Private hospital	No	No	Yes	3	4	6	7	4	7	7	6	4	4	0	2	3	3	3	1	2	0	0	2	1	0	0	0	0	0	0	0	0	0	1	3	2	2
26-34	Urban	Primary	Not Employed	Not Employed	More female babies	2 to 6 years	26,000 – 50,000	With Spouse’s extended family	9 months	Female	C- section	Government hospital	No	No	Yes	6	2	1	6	2	3	2	3	7	2	3	1	3	1	0	0	3	3	0	1	1	0	0	0	1	0	0	0	0	0	0	3	2	3
35-44	Urban	No Formal education	Not Employed	Not Employed	Equal number of male and female babies	More than 6 years	26,000 – 50,000	With Spouse’s extended family	Less than 9 months	Female	C- section	Private hospital	No	No	Yes	2	3	6	7	3	4	2	3	4	4	3	3	0	3	0	0	3	2	1	3	1	1	0	0	0	0	0	0	0	0	1	1	3	2
35-44	Urban	High School	Not Employed	Employed	Equal number of male and female babies	More than 6 years	50,000 – 1 lac PKR	With Spouse’s extended family	Less than 9 months	Female	C- section	Government hospital	No	No	Yes	2	3	6	7	4	4	6	6	4	7	3	3	3	3	3	3	0	0	3	3	1	0	0	0	0	1	0	0	0	0	0	1	2	3
35-44	Urban	Middle	Not Employed	Not Employed	More female babies	2 to 6 years	50,000 – 1 lac PKR	With Spouse’s extended family	9 months	Female	C- section	Government hospital	No	No	Yes	2	1	3	1	3	2	2	7	2	2	0	0	3	3	3	3	3	3	2	3	1	1	0	0	0	0	0	0	0	0	1	2	3	2
35-44	Rural	Primary	Not Employed	Not Employed	Equal number of male and female babies	2 to 6 years	26,000 – 50,000	With Spouse’s extended family	9 months	Female	C- section	Government hospital	No	No	Yes	4	2	4	4	6	7	4	6	6	6	2	2	3	2	1	0	0	0	3	3	1	1	0	0	0	0	0	0	0	0	1	3	1	3
26-34	Urban	Middle	Not Employed	Employed	More male babies	More than 6 years	More than 1 lac PKR	With Spouse’s extended family	Less than 9 months	Female	C- section	Government hospital	No	No	Yes	6	7	6	7	7	6	1	7	6	4	3	2	0	3	3	3	1	2	1	3	1	0	1	0	0	0	0	0	0	0	0	3	3	3
26-34	Urban	No Formal education	Not Employed	Employed	More female babies	More than 6 years	26,000 – 50,000	With Spouse’s extended family	9 months	male	C- section	Government hospital	No	Yes	Yes	6	7	4	6	7	4	6	4	6	7	3	0	0	3	3	1	3	3	1	0	1	0	0	0	0	0	0	0	0	1	0	2	3	3
35-44	Urban	Bachelors	Not Employed	Employed	Equal number of male and female babies	More than 6 years	50,000 – 1 lac PKR	With Spouse’s extended family	9 months	Female	C- section	Government hospital	No	No	Yes	1	3	3	7	6	7	4	6	7	6	1	0	3	3	3	2	3	1	3	1	1	0	0	0	0	0	0	0	0	0	1	0	2	3
16-25	Urban	Primary	Not Employed	Employed	More male babies	More than 6 years	26,000 – 50,000	With Spouse’s extended family	9 months	male	C- section	Private hospital	Yes	No	Yes	6	7	7	6	6	6	7	7	6	7	3	1	3	3	3	0	3	3	1	3	1	0	0	0	0	0	0	0	1	1	1	2	2	3
26-34	Urban	Bachelors	Not Employed	Employed	More female babies	More than 6 years	26,000 – 50,000	With Spouse’s extended family	9 months	Female	C- section	Government hospital	No	No	Yes	6	6	1	3	3	4	3	4	1	3	2	3	2	3	2	3	3	3	0	2	1	0	1	0	0	0	0	0	0	1	1	2	0	3
26-34	Urban	Middle	Not Employed	Not Employed	More female babies	Less than one year	26,000 – 50,000	With Spouse’s extended family	9 months	Female	C- section	Government hospital	Yes	No		5	5	5	5	5	5	5	5	5	5	1	2	1	1	1	1	3	3	3	3	1	0	0	0	0	0	0	0	0	0	0	2	0	2
26-34	Urban	No Formal education	Not Employed	Employed	More female babies	2 to 6 years	26,000 – 50,000	With Spouse’s extended family	9 months	male	C- section	Private hospital	Yes	No	Yes	6	6	6	5	6	6	5	5	5	5	1	1	2	2	2	2	1	1	1	2	1	1	1	1	0	0	0	1	1	0	0	1	2	2
26-34	Urban	Primary	Not Employed	Employed	More female babies	2 to 6 years	26,000 – 50,000	Own house	Less than 9 months	male	Simple Vaginal delivery (Normal)	Government hospital	No	No	Yes	5	3	4	5	4	4	5	4	5	4	0	1	1	3	2	1	1	2	1	0	1	1	0	0	0	0	0	0	0	0	0	2	2	2
26-34	Urban	Primary	Not Employed	Employed	More female babies	2 to 6 years	25,000 PKR or less	With Spouse’s extended family	Less than 9 months	Female	C- section	Government hospital	No	No	Yes	4	5	5	5	5	5	5	5	5	5	2	1	3	2	1	2	2	2	1	0	1	0	0	1	0	0	0	0	0	0	0	2	2	0
35-44	Urban	No Formal education	Not Employed	Employed	More female babies	2 to 6 years	25,000 PKR or less	With Spouse’s extended family	Less than 9 months	Female	C- section	Government hospital	No	No	Yes	4	5	3	3	5	5	5	5	3	5	1	1	3	2	2	1	2	1	1	1	1	1	0	0	0	0	0	0	0	0	0	2	1	2
26-34	Urban	Primary	Not Employed	Employed	More female babies	More than 6 years	26,000 – 50,000	With Spouse’s extended family	Less than 9 months	Female	C- section	Government hospital	No	No	Yes	5	3	5	5	5	5	5	6	6	5	1	1	1	3	2	2	2	1	3	0	1	1	1	0	0	0	0	0	0	0	0	2	2	2
16-25	Urban	High School	Not Employed	Not Employed	More female babies	2 to 6 years	50,000 – 1 lac PKR	Own house	9 months	male	C- section	Government hospital	No	No	Yes	5	5	3	5	3	5	5	5	5	5	1	1	1	1	1	2	2	2	2	2	1	1	0	0	0	0	0	0	0	0	0	1	1	1
26-34	Urban	High School	Not Employed	Not Employed	More female babies	2 to 6 years	26,000 – 50,000	With Spouse’s extended family	Less than 9 months	Female	Simple Vaginal delivery (Normal)	Government hospital	No	No	Yes	6	6	5	6	5	5	5	5	6	5	1	1	1	2	1	2	2	1	2	1	1	1	1	1	0	0	0	0	0	0	0	0	0	0
16-25	Urban	High School	Not Employed	Not Employed	More female babies	More than 6 years	26,000 – 50,000	With Spouse’s extended family	Less than 9 months	Female	Simple Vaginal delivery (Normal)	Government hospital	No	No	Yes	3	3	4	2	5	5	5	5	5	5	2	1	3	3	0	1	2	2	2	0	1	0	0	0	0	0	0	0	1	0	0	2	1	2
26-34	Urban	Middle	Not Employed	Employed	Equal number of male and female babies	More than 6 years	26,000 – 50,000	With Spouse’s extended family	9 months	male	C- section	Government hospital	No	Yes	Yes	3	5	5	5	5	5	5	5	5	6	2	1	1	2	3	2	2	1	1	0	1	0	1	1	0	0	0	0	0	0	0	2	0	2
26-34	Urban	High School	Not Employed	Not Employed	More female babies	More than 6 years	26,000 – 50,000	With Spouse’s extended family	9 months	male	C- section	Government hospital	No	Yes	Yes	5	5	5	5	5	5	5	5	6	7	1	2	1	2	2	1	1	1	3	0	1	1	1	0	0	0	0	0	0	0	0	2	1	2
26-34	Urban	Bachelors	Not Employed	Employed	More female babies	More than 6 years	50,000 – 1 lac PKR	Own house	9 months	Female	Simple Vaginal delivery (Normal)	Government hospital	No	No	Yes	5	5	5	5	6	5	7	7	5	7	2	1	2	2	2	2	2	2	2	2	1	1	0	0	0	0	0	1	0	0	0	2	2	2
26-34	Urban	Primary	Not Employed	Employed	More female babies	More than 6 years	25,000 PKR or less	With Spouse’s extended family	9 months	Female	C- section	Government hospital	No	No	Yes	7	5	5	5	5	5	3	3	6	3	2	2	2	2	1	2	2	1	1	0	1	0	0	0	0	0	0	0	0	0	1	3	2	2
26-34	Urban	High School	Employed	Employed	Equal number of male and female babies	More than 6 years	26,000 – 50,000	Own house	9 months	male	C- section	Government hospital	No	No	Yes	5	5	5	5	5	5	6	6	5	7	2	2	2	1	1	3	2	1	2	0	1	1	1	1	1	0	0	0	0	0	0	1	1	2
26-34	Urban	Primary	Not Employed	Employed	More female babies	2 to 6 years	26,000 – 50,000	With Spouse’s extended family	9 months	male	Simple Vaginal delivery (Normal)	Government hospital	Yes	No	Yes	5	5	5	5	5	5	5	5	5	5	0	1	1	2	2	1	2	2	2	2	1	1	0	1	0	0	0	0	0	0	0	3	3	2
35-44	Urban	Bachelors	Not Employed	Employed	More female babies	More than 6 years	26,000 – 50,000	With Spouse’s extended family	9 months	male	Simple Vaginal delivery (Normal)	Government hospital	No	No	Yes	5	5	5	5	5	5	5	5	4	5	1	0	1	3	2	3	3	3	3	0	1	1	0	0	0	0	0	0	0	0	0	1	1	2
26-34	Urban	Primary	Not Employed	Employed	More female babies	More than 6 years	26,000 – 50,000	With Spouse’s extended family	Less than 9 months	Female	C- section	Government hospital	No	No	Yes	5	5	5	5	5	5	5	5	5	5	1	1	2	2	1	2	1	1	2	0	1	0	0	0	0	0	0	0	0	0	0	2	2	2
26-34	Urban	No Formal education	Employed	Not Employed	More female babies	2 to 6 years	26,000 – 50,000	With Spouse’s extended family	9 months	Female	Simple Vaginal delivery (Normal)	Government hospital	Yes	No	Yes	5	6	5	5	5	5	5	5	5	5	3	0	3	2	3	2	2	2	2	0	1	0	0	1	0	0	0	0	0	0	0	2	2	2
26-34	Urban	High School	Employed	Employed	More female babies	More than 6 years	50,000 – 1 lac PKR	Own house	9 months	Female	C- section	Private hospital	Yes	No	Yes	7	7	5	7	4	4	5	4	7	4	1	2	0	3	1	3	1	2	2	1	1	1	0	1	0	1	0	1	0	0	0	0	0	0
35-44	Urban	Bachelors	Employed	Employed	More female babies	More than 6 years	50,000 – 1 lac PKR	Own house	9 months	Female	C- section	Private hospital	No	No	Yes	7	7	5	7	7	7	6	5	7	5	2	2	1	2	1	2	3	3	3	1	1	1	1	1	0	1	0	1	0	0	0	0	0	0
26-34	Urban	Primary	Not Employed	Employed	More female babies	More than 6 years	26,000 – 50,000	Own house	9 months	male	C- section	Government hospital	No	Yes	Yes	5	6	5	6	5	5	5	6	5	3	1	2	1	2	2	1	1	1	2	3	1	1	0	0	0	0	0	0	0	0	0	2	2	2
26-34	Urban	High School	Not Employed	Not Employed	Equal number of male and female babies	2 to 6 years	25,000 PKR or less	With Spouse’s extended family	9 months	Female	C- section	Government hospital	No	Yes	Yes	5	5	4	6	5	1	6	3	5	4	2	1	2	1	2	1	3	1	1	0	1	1	0	0	0	0	0	0	0	0	0	2	2	1
26-34	Urban	High School	Not Employed	Employed	More female babies	2 to 6 years	50,000 – 1 lac PKR	Own house	9 months	male	Simple Vaginal delivery (Normal)	Government hospital	No	Yes	Yes	2	2	2	3	3	3	3	3	5	3	0	0	1	2	2	2	2	2	1	1	1	0	0	1	0	0	0	0	0	0	0	3	2	2
35-44	Urban	Primary	Not Employed	Employed	Equal number of male and female babies	2 to 6 years	26,000 – 50,000	With Spouse’s extended family	9 months	male	Simple Vaginal delivery (Normal)	Government hospital	No	No	Yes	5	5	5	5	5	5	5	5	5	5	0	1	3	2	2	1	2	1	1	2	1	0	0	0	1	0	0	0	0	0	0	2	1	2
26-34	Urban	Primary	Not Employed	Employed	More female babies	More than 6 years	26,000 – 50,000	With Spouse’s extended family	Less than 9 months	Female	C- section	Government hospital	No	Yes	Yes	5	5	5	5	3	3	5	3	6	4	0	0	1	3	2	1	3	1	2	0	1	1	0	0	0	0	0	0	0	0	0	2	0	0
26-34	Urban	High School	Not Employed	Employed	More female babies	More than 6 years	26,000 – 50,000	With Spouse’s extended family	Less than 9 months	Female	C- section	Government hospital	No	No	Yes	5	6	5	6	4	5	5	5	5	5	2	1	2	2	3	2	2	3	3	3	1	1	0	1	0	0	0	0	0	0	0	2	2	2
35-44	Urban	Middle	Not Employed	Employed	More female babies	More than 6 years	26,000 – 50,000	With Spouse’s extended family	Less than 9 months	Female	Simple Vaginal delivery (Normal)	Government hospital	No	Yes	Yes	3	6	5	6	5	5	5	5	5	5	1	1	1	2	0	0	3	3	2	1	1	1	0	1	0	0	0	0	0	0	0	1	1	1
26-34	Urban	High School	Not Employed	Employed	Equal number of male and female babies	More than 6 years	26,000 – 50,000	With Spouse’s extended family	9 months	male	Simple Vaginal delivery (Normal)	Government hospital	No	No	Yes	5	5	5	3	3	5	3	4	5	5	2	1	2	1	1	1	1	2	3	0	1	0	1	0	0	0	0	0	0	0	0	1	2	1
35-44	Urban	Middle	Not Employed	Employed	More female babies	More than 6 years	26,000 – 50,000	With Spouse’s extended family	9 months	Female	C- section	Government hospital	Yes	No	Yes	5	2	5	6	5	1	3	5	5	5	0	0	3	3	1	2	2	2	2	2	1	1	0	0	0	0	0	0	0	0	0	0	0	0
35-44	Urban	High School	Not Employed	Employed	More female babies	More than 6 years	25,000 PKR or less	With Spouse’s extended family	9 months	Female	C- section	Government hospital	Yes	No	Yes	5	5	5	5	5	3	5	5	5	4	0	1	1	3	2	2	2	2	2	2	1	0	0	1	0	0	0	0	0	0	0	3	1	2
26-34	Urban	High School	Not Employed	Not Employed	More female babies	Less than one year	25,000 PKR or less	With Spouse’s extended family	Less than 9 months	Female	C- section	Government hospital	No	Yes	Yes	5	3	3	3	5	5	3	5	3	5	0	0	3	3	3	2	2	2	2	1	1	0	0	0	1	0	0	0	0	0	0	2	1	1
26-34	Urban	Primary	Not Employed	Employed	More female babies	2 to 6 years	26,000 – 50,000	With Spouse’s extended family	Less than 9 months	Female	C- section	Government hospital	No	Yes	Yes	5	3	5	5	5	5	5	5	5	5	0	0	1	2	2	2	2	2	2	0	1	1	0	0	1	0	0	0	0	0	0	2	1	2
26-34	Urban	High School	Not Employed	Employed	More female babies	2 to 6 years	26,000 – 50,000	Own house	9 months	Female	C- section	Government hospital	No	No	Yes	5	3	5	5	5	3	6	5	5	4	1	2	1	1	2	1	1	2	2	2	1	1	1	1	0	0	0	1	0	0	0	0	0	2
26-34	Urban	Primary	Not Employed	Employed	Equal number of male and female babies	2 to 6 years	50,000 – 1 lac PKR	With Spouse’s extended family	Less than 9 months	male	C- section	Government hospital	No	No	Yes	1	2	2	5	2	3	3	5	5	5	2	1	1	2	1	2	2	2	2	2	1	1	0	0	0	0	0	0	0	0	0	3	0	0
26-34	Urban	Bachelors	Employed	Employed	More male babies	2 to 6 years	50,000 – 1 lac PKR	Own house	9 months	male	C- section	Government hospital	Yes	No	Yes	5	5	5	6	5	4	5	5	5	5	1	0	1	3	1	1	2	1	1	1	1	1	1	0	0	0	0	0	0	0	0	2	1	1
16-25	Urban	High School	Not Employed	Employed	More female babies	2 to 6 years	26,000 – 50,000	With Spouse’s extended family	Less than 9 months	male	C- section	Government hospital	No	Yes	Yes	5	6	6	5	5	5	5	5	5	5	2	2	3	2	3	2	3	3	3	3	1	1	1	1	0	0	0	0	0	0	0	3	2	2
35-44	Urban	High School	Not Employed	Employed	More female babies	2 to 6 years	26,000 – 50,000	With Spouse’s extended family	9 months	Female	Simple Vaginal delivery (Normal)	Government hospital	Yes	No	Yes	5	5	5	3	5	5	3	3	3	3	0	1	1	2	3	1	2	2	1	0	1	0	0	0	0	0	0	0	0	0	1	0	0	1
16-25	Urban	High School	Not Employed	Employed	Equal number of male and female babies	2 to 6 years	26,000 – 50,000	With Spouse’s extended family	9 months	male	Simple Vaginal delivery (Normal)	Government hospital	No	Yes	Yes	6	6	5	6	3	3	5	3	6	3	2	1	1	2	1	1	1	1	1	2	1	1	0	0	0	0	0	0	0	0	0	2	2	2
35-44	Urban	High School	Not Employed	Not Employed	More female babies	2 to 6 years	50,000 – 1 lac PKR	With Spouse’s extended family	Less than 9 months	Female	C- section	Government hospital	No	Yes	Yes	3	5	3	5	5	5	5	3	5	3	1	2	2	1	2	1	1	1	2	1	1	0	0	1	1	0	0	0	0	0	0	2	1	2
26-34	Urban	Middle	Not Employed	Not Employed	More female babies	More than 6 years	50,000 – 1 lac PKR	With Spouse’s extended family	9 months	male	Simple Vaginal delivery (Normal)	Government hospital	No	No	Yes	5	5	5	3	3	3	6	6	4	6	2	1	1	2	2	2	1	2	1	2	1	1	1	1	1	0	0	0	0	0	0	2	3	2
26-34	Urban	High School	Not Employed	Not Employed	Equal number of male and female babies	2 to 6 years	26,000 – 50,000	With Spouse’s extended family	Less than 9 months	Female	Simple Vaginal delivery (Normal)	Government hospital	No	No	Yes	5	6	5	5	5	5	5	6	6	5	1	2	2	2	2	1	1	1	2	0	1	1	0	0	1	0	0	0	0	0	0	3	2	0
26-34	Urban	No Formal education	Not Employed	Not Employed	Equal number of male and female babies	More than 6 years	26,000 – 50,000	With Spouse’s extended family	9 months	male	C- section	Government hospital	No	No	Yes	7	7	7	5	5	5	5	4	7	5	2	1	1	1	1	1	2	2	1	2	1	1	1	1	0	0	0	0	0	0	0	1	1	1
16-25	Urban	High School	Not Employed	Employed	More female babies	More than 6 years	26,000 – 50,000	With Spouse’s extended family	9 months	male	C- section	Government hospital	No	Yes	Yes	5	3	3	3	3	5	6	5	6	7	0	0	1	2	0	3	3	2	2	0	1	1	1	0	0	0	0	0	0	0	0	0	0	3
26-34	Urban	High School	Not Employed	Employed	More female babies	More than 6 years	26,000 – 50,000	With Spouse’s extended family	9 months	Female	Simple Vaginal delivery (Normal)	Government hospital	No	No	Yes	4	5	5	5	3	5	5	5	6	6	2	1	1	1	1	1	3	1	1	0	1	1	0	1	0	0	0	0	1	0	0	2	2	0
26-34	Urban	Middle	Employed	Not Employed	Equal number of male and female babies	More than 6 years	26,000 – 50,000	With Spouse’s extended family	Less than 9 months	male	C- section	Government hospital	No	No	Yes	3	5	6	5	5	5	1	3	5	1	0	0	3	2	1	1	2	1	3	0	1	0	0	1	1	0	0	0	0	1	0	1	1	2
16-25	Urban	High School	Not Employed	Employed	More female babies	2 to 6 years	26,000 – 50,000	With Spouse’s extended family	Less than 9 months	Female	Simple Vaginal delivery (Normal)	Private hospital	Yes	No	Yes	5	6	6	6	4	4	6	4	5	4	2	1	1	2	2	1	1	1	1	1	1	1	0	1	1	0	0	0	0	0	0	1	1	2
35-44	Rural	Middle	Not Employed	Employed	More male babies	More than 6 years	50,000 – 1 lac PKR	With Spouse’s extended family	9 months	male	Simple Vaginal delivery (Normal)	Government hospital	No	No	Yes	5	5	5	5	5	5	5	4	5	3	2	1	1	2	2	2	2	2	1	0	1	1	0	0	0	0	0	0	1	1	0	1	0	1
26-34	Urban	High School	Not Employed	Employed	More female babies	More than 6 years	50,000 – 1 lac PKR	Own house	9 months	male	Simple Vaginal delivery (Normal)	Private hospital	Yes	No	Yes	5	5	5	5	5	5	3	5	5	5	2	2	2	1	3	3	2	2	2	2	1	1	0	1	0	1	0	0	0	0	0	0	0	0
16-25	Rural	High School	Not Employed	Employed	More male babies	More than 6 years	26,000 – 50,000	Own house	Less than 9 months	male	Simple Vaginal delivery (Normal)	Government hospital	Yes	No	Yes	2	5	5	3	1	5	1	5	6	5	2	1	1	2	1	1	2	1	1	0	1	1	0	0	0	0	0	0	0	0	0	2	2	2
35-44	Urban	High School	Not Employed	Employed	More female babies	2 to 6 years	26,000 – 50,000	With Spouse’s extended family	9 months	male	C- section	Government hospital	No	Yes	Yes	5	5	4	5	5	5	5	5	5	5	1	2	1	2	2	1	1	2	2	0	1	0	0	1	1	0	0	0	0	0	0	2	1	2
35-44	Urban	High School	Not Employed	Employed	More female babies	2 to 6 years	26,000 – 50,000	With Spouse’s extended family	9 months	male	Simple Vaginal delivery (Normal)	Government hospital	Yes	No	Yes	5	5	5	5	5	5	5	5	5	5	2	1	2	2	2	2	2	3	2	2	1	1	0	0	0	0	0	0	1	0	0	2	1	2
26-34	Rural	High School	Not Employed	Employed	Equal number of male and female babies	2 to 6 years	26,000 – 50,000	With Spouse’s extended family	9 months	male	C- section	Government hospital	Yes	No	Yes	3	5	5	5	6	5	5	6	5	5	1	0	1	0	3	3	2	2	2	0	1	1	0	0	0	0	0	0	0	0	0	3	1	2
35-44	Urban	High School	Not Employed	Not Employed	More male babies	More than 6 years	26,000 – 50,000	With Spouse’s extended family	Less than 9 months	male	Simple Vaginal delivery (Normal)	Government hospital	Yes	No	Yes	1	5	4	2	4	4	5	4	2	1	0	0	1	1	3	3	2	2	3	3	1	1	0	0	0	0	0	0	1	0	0	2	1	2
35-44	Urban	High School	Not Employed	Employed	More male babies	2 to 6 years	26,000 – 50,000	With Spouse’s extended family	Less than 9 months	male	Simple Vaginal delivery (Normal)	Private hospital	Yes	No	Yes	3	5	5	5	5	5	5	5	5	5	2	1	1	1	2	2	2	2	2	0	1	1	0	0	0	0	0	0	0	0	0	2	2	2
16-25	Rural	High School	Not Employed	Employed	Equal number of male and female babies	More than 6 years	50,000 – 1 lac PKR	Own house	9 months	Female	C- section	Government hospital	No	Yes	Yes	4	5	5	4	4	4	4	4	5	4	2	1	1	1	3	3	2	1	1	0	1	0	0	1	0	0	0	0	0	0	0	2	2	1
45+	Rural	Primary	Not Employed	Employed	More female babies	More than 6 years	26,000 – 50,000	With Spouse’s extended family	Less than 9 months	Female	C- section	Government hospital	No	Yes	Yes	3	4	4	3	3	4	3	4	3	4	2	1	2	2	2	1	3	3	1	2	1	1	0	0	0	0	0	0	0	0	0	2	2	2
26-34	Rural	No Formal education	Not Employed	Employed	More female babies	More than 6 years	25,000 PKR or less	With Spouse’s extended family	Less than 9 months	male	C- section	Government hospital	No	No	Yes	3	5	5	5	5	5	5	5	5	5	0	0	1	2	1	2	2	2	2	0	1	1	0	0	0	0	0	0	0	0	0	2	1	1
26-34	Urban	High School	Not Employed	Employed	More male babies	More than 6 years	26,000 – 50,000	Own house	9 months	male	C- section	Government hospital	No	No	Yes	5	5	5	5	5	5	5	5	5	5	0	1	1	3	1	1	2	2	2	2	1	0	0	1	0	0	0	0	0	0	0	0	0	0
26-34	Urban	Primary	Not Employed	Employed	Equal number of male and female babies	2 to 6 years	26,000 – 50,000	Own house	9 months	male	C- section	Government hospital	No	No	Yes	2	6	6	6	2	4	6	4	5	4	2	2	2	2	2	2	2	2	2	0	1	1	0	0	0	0	0	0	0	0	0	2	3	2
26-34	Rural	High School	Not Employed	Employed	More female babies	More than 6 years	26,000 – 50,000	With Spouse’s extended family	9 months	Female	Simple Vaginal delivery (Normal)	Government hospital	Yes	Yes	Yes	4	5	5	5	5	5	5	5	5	5	2	1	2	2	2	2	2	2	2	0	1	1	1	1	0	0	0	0	0	0	1	3	3	2
26-34	Urban	High School	Not Employed	Employed	More female babies	More than 6 years	50,000 – 1 lac PKR	Own house	Less than 9 months	Female	Simple Vaginal delivery (Normal)	Government hospital	No	No	Yes	1	2	6	5	5	5	5	5	2	6	2	1	1	2	2	1	2	2	2	1	1	1	1	1	1	0	0	0	0	0	0	1	2	2
16-25	Urban	High School	Not Employed	Employed	More female babies	More than 6 years	26,000 – 50,000	With Spouse’s extended family	9 months	Female	Simple Vaginal delivery (Normal)	Government hospital	No	Yes	Yes	6	6	6	6	6	6	6	5	5	6	1	1	1	2	2	3	0	0	3	3	1	1	1	0	0	0	0	0	0	0	0	2	3	3
26-34	Urban	High School	Employed	Not Employed	More female babies	More than 6 years	26,000 – 50,000	With Spouse’s extended family	9 months	Female	C- section	Government hospital	No	No	Yes	3	3	5	3	5	5	5	5	5	6	2	1	2	2	2	2	2	1	2	0	1	0	1	0	0	0	0	0	0	0	0	2	1	2
35-44	Rural	High School	Not Employed	Employed	More female babies	More than 6 years	26,000 – 50,000	With Spouse’s extended family	9 months	Female	C- section	Government hospital	No	No	Yes	5	2	5	5	5	5	5	5	5	3	2	1	0	0	2	1	2	2	3	0	1	1	1	0	0	0	0	0	0	0	0	2	1	1
35-44	Urban	Bachelors	Not Employed	Employed	More female babies	More than 6 years	26,000 – 50,000	With Spouse’s extended family	9 months	Female	Simple Vaginal delivery (Normal)	Government hospital	No	Yes	Yes	3	5	5	5	5	5	5	5	5	5	1	1	1	2	2	2	2	1	2	1	1	1	0	0	0	0	0	0	0	0	0	2	1	2
35-44	Rural	Bachelors	Employed	Employed	Equal number of male and female babies	More than 6 years	50,000 – 1 lac PKR	With Spouse’s extended family	9 months	male	Simple Vaginal delivery (Normal)	Government hospital	No	No	Yes	3	6	6	6	6	6	6	6	6	6	0	0	2	2	2	2	1	3	3	0	1	1	0	1	0	0	0	0	0	0	0	2	1	2
35-44	Rural	High School	Not Employed	Employed	More female babies	2 to 6 years	26,000 – 50,000	With Spouse’s extended family	9 months	Female	Simple Vaginal delivery (Normal)	Government hospital	Yes	No	Yes	5	6	6	6	5	5	6	5	5	5	2	1	2	1	2	2	2	2	2	2	1	1	1	0	0	0	0	0	0	0	0	2	3	3
26-34	Urban	High School	Not Employed	Employed	More male babies	More than 6 years	26,000 – 50,000	With Spouse’s extended family	9 months	male	C- section	Government hospital	No	No	Yes	5	5	5	5	5	5	5	5	5	5	2	1	2	2	2	1	2	2	1		1	1	0	0	0	0	0	0	0	0	0	2	1	2
26-34	Urban	High School	Not Employed	Not Employed	More female babies	More than 6 years	50,000 – 1 lac PKR	With Spouse’s extended family	9 months	Female	C- section	Government hospital	No	No	Yes	5	5	6	5	5	6	6	6	6	5	2	1	2	2	2	2	1	2	2	0	1	1	0	0	0	0	0	0	0	0	0	2	2	3
35-44	Rural	High School	Not Employed	Employed	More male babies	More than 6 years	26,000 – 50,000	With Spouse’s extended family	9 months	Female	Simple Vaginal delivery (Normal)	Government hospital	No	Yes	Yes	5	5	3	5	5	5	5	5	5	5	0	0	2	2	2	3	2	2	2	0	1	1	0	0	0	0	0	0	1	0	0	2	1	1
35-44	Urban	High School	Not Employed	Employed	More female babies	2 to 6 years	26,000 – 50,000	With Spouse’s extended family	9 months	Female	C- section	Government hospital	Yes	No	Yes	1	6	5	6	5	5	6	5	6	5	2	2	2	1	2	2	2	3	2	0	1	0	0	0	1	0	0	0	0	0	0	2	1	2
26-34	Urban	High School	Not Employed	Employed	More female babies	2 to 6 years	50,000 – 1 lac PKR	With Spouse’s extended family	9 months	Female	Simple Vaginal delivery (Normal)	Government hospital	Yes	No	Yes	5	5	7	5	5	5	5	5	5	5	2	1	2	2	2	3	3	2	2	0	1	1	0	0	0	0	0	0	0	0	0	1	1	3
26-34	Urban	High School	Not Employed	Employed	Equal number of male and female babies	More than 6 years	25,000 PKR or less	With Spouse’s extended family	Less than 9 months	male	C- section	Government hospital	No	Yes	Yes	4	4	4	4	4	4	4	4	4	4	2	1	2	1	1	3	3	3	1	1	1	0	0	0	0	0	0	0	0	0	1	0	0	3
35-44	Urban	Middle	Not Employed	Employed	More female babies	More than 6 years	26,000 – 50,000	With Spouse’s extended family	Less than 9 months	male	Simple Vaginal delivery (Normal)	Government hospital	No	No	Yes	4	1	2	3	4	5	6	5	2	1	2	2	2	1	1	3	1	2	0	0	1	1	0	1	0	0	0	0	0	0	0	3	3	3
26-34	Urban	High School	Not Employed	Employed	Equal number of male and female babies	More than 6 years	26,000 – 50,000	Own house	Less than 9 months	Female	C- section	Government hospital	No	No	Yes	5	5	5	5	4	5	5	5	5	5	1	2	2	1	2	3	3	2	3	1	1	0	0	0	1	0	0	0	0	0	0	2	2	0
26-34	Urban	High School	Not Employed	Employed	More female babies	2 to 6 years	26,000 – 50,000	With Spouse’s extended family	9 months	Female	C- section	Government hospital	Yes	No	Yes	5	5	5	5	5	5	5	5	3	5	1	2	1	2	2	2	3	2	3	3	1	1	0	0	1	0	0	0	0	0	0	2	2	2
26-34	Urban	High School	Not Employed	Employed	More female babies	More than 6 years	50,000 – 1 lac PKR	Own house	9 months	male	C- section	Government hospital	No	Yes	Yes	6	6	6	6	6	6	6	6	6	6	3	3	2	0	2	3	3	3	0	3	1	1	0	0	0	0	0	0	0	0	0	1	2	1
35-44	Urban	Primary	Not Employed	Employed	More female babies	More than 6 years	26,000 – 50,000	Own house	9 months	Female	Simple Vaginal delivery (Normal)	Government hospital	No	Yes	Yes	5	3	5	6	5	5	5	5	5	5	1	3	2	2	3	3	3	2	2	1	1	1	0	0	0	0	0	0	0	0	0	1	2	2
26-34	Urban	High School	Not Employed	Employed	More female babies	2 to 6 years	26,000 – 50,000	With Spouse’s extended family	9 months	male	Simple Vaginal delivery (Normal)	Government hospital	No	Yes	Yes	3	5	5	5	5	5	6	5	5	5	1	2	2	1	2	2	3	3	3	3	1	1	0	0	0	0	0	0	0	0	0	2	1	2
26-34	Urban	Middle	Not Employed	Not Employed	Equal number of male and female babies	More than 6 years	26,000 – 50,000	With Spouse’s extended family	Less than 9 months	male	Simple Vaginal delivery (Normal)	Government hospital	No	No	Yes	5	5	5	5	5	5	5	5	5	5	2	2	3	1	2	2	1	2	2	2	1	1	1	1	1	0	0	0	0	0	0	2	2	3
35-44	Urban	High School	Not Employed	Employed	Equal number of male and female babies	More than 6 years	26,000 – 50,000	Own house	Less than 9 months	male	Simple Vaginal delivery (Normal)	Government hospital	Yes	No	Yes	5	5	5	5	5	5	5	5	5	6	0	1	2	2	2	2	2	2	2	1	1	1	1	1	1	0	0	0	0	0	0	2	3	3
35-44	Rural	High School	Not Employed	Employed	More female babies	2 to 6 years	26,000 – 50,000	With Spouse’s extended family	9 months	Female	Simple Vaginal delivery (Normal)	Government hospital	No	Yes	Yes	3	3	3	3	4	4	5	4	4	4	2	2	2	2	3	2	2	2	2	2	1	1	0	0	0	0	0	0	0	0	0	3	2	1
26-34	Urban	High School	Not Employed	Employed	More female babies	2 to 6 years	25,000 PKR or less	With Spouse’s extended family	9 months	male	C- section	Government hospital	No	No	Yes	2	5	5	5	5	5	5	5	5	5	2	2	1	1	1	2	3	3	1	0	1	0	0	0	1	0	0	0	0	0	0	0	0	0
26-34	Urban	High School	Not Employed	Employed	More male babies	2 to 6 years	26,000 – 50,000	With Spouse’s extended family	9 months	male	Simple Vaginal delivery (Normal)	Government hospital	Yes	No	Yes	5	6	6	5	4	4	6	4	4	4	2	2	2	2	2	2	2	2	2	2	1	1	0	0	0	0	0	0	0	0	0	2	2	3
26-34	Urban	High School	Not Employed	Employed	More female babies	2 to 6 years	26,000 – 50,000	With Spouse’s extended family	9 months	Female	Simple Vaginal delivery (Normal)	Government hospital	Yes	No	Yes	1	5	5	5	5	5	5	5	5	5	2	2	2	1	2	2	2	2	1	0	1	1	0	0	0	0	0	0	0	0	0	2	2	2
26-34	Urban	High School	Not Employed	Employed	More female babies	2 to 6 years	26,000 – 50,000	With Spouse’s extended family	9 months	Female	C- section	Government hospital	No	No	Yes	2	2	2	3	3	3	3	3	3	3	2	1	1	1	2	1	1	1	2	0	1	1	0	0	0	0	0	0	0	0	0	2	2	1
35-44	Urban	Middle	Not Employed	Not Employed	More male babies	2 to 6 years	26,000 – 50,000	Own house	9 months	male	Simple Vaginal delivery (Normal)	Government hospital	No	No	Yes	5	5	5	5	5	5	5	5	5	5	2	1	2	1	2	2	2	2	1	0	1	0	0	0	0	0	0	0	0	0	1	1	1	1
35-44	Urban	High School	Not Employed	Employed	Equal number of male and female babies	2 to 6 years	26,000 – 50,000	With Spouse’s extended family	9 months	male	Simple Vaginal delivery (Normal)	Government hospital	No	No	Yes	3	5	5	5	5	5	5	5	5	5	2	1	1	2	1	1	1	1	1	1	1	1	0	0	0	0	0	0	0	0	0	2	2	2
35-44	Urban	Primary	Not Employed	Employed	More male babies	More than 6 years	26,000 – 50,000	Own house	9 months	male	C- section	Government hospital	Yes	No	Yes	3	3	3	3	3	3	3	3	3	3	2	3	1	1	2	2	1	1	1	0	1	0	0	0	1	0	0	0	0	0	0	3	3	3
26-34	Urban	High School	Not Employed	Not Employed	More female babies	2 to 6 years	26,000 – 50,000	With Spouse’s extended family	9 months	male	Simple Vaginal delivery (Normal)	Government hospital	Yes	No	Yes	5	5	5	5	5	5	5	5	5	5	1	1	2	2	3	1	2	1	3	1	1	1	0	0	0	0	0	0	0	0	0	3	3	3
35-44	Urban	High School	Not Employed	Employed	More female babies	More than 6 years	26,000 – 50,000	With Spouse’s extended family	9 months	male	Simple Vaginal delivery (Normal)	Government hospital	No	Yes	Yes	5	5	4	5	4	4	5	5	5	4	1	2	3	1	2	2	1	2	0	0	1	0	0	1	0	0	0	0	0	0	0	1	1	1
26-34	Urban	High School	Not Employed	Employed	More male babies	Less than one year	More than 1 lac PKR	Own house	9 months	male	Simple Vaginal delivery (Normal)	Private hospital	Yes	No	Yes	6	6	6	6	5	5	6	5	6	5	2	1	2	2	2	2	2	2	2	0	1	1	0	0	0	0	0	0	0	0	0	2	2	1
35-44	Urban	High School	Not Employed	Employed	More male babies	2 to 6 years	More than 1 lac PKR	Own house	9 months	male	C- section	Private hospital	No	No	Yes	5	5	5	5	5	5	5	5	5	5	2	0	2	2	2	2	2	1	2	2	1	1	0	1	0	0	0	0	0	0	0	2	1	2
35-44	Urban	High School	Not Employed	Employed	More male babies	2 to 6 years	More than 1 lac PKR	Own house	9 months	Female	C- section	Government hospital	No	No	Yes	5	5	5	5	5	5	5	5	5	5	1	1	3	3	3	1	2	2	1	2	1	1	0	0	0	0	0	0	0	0	0	2	1	1
35-44	Urban	High School	Not Employed	Employed	Equal number of male and female babies	More than 6 years	More than 1 lac PKR	Own house	9 months	Female	C- section	Private hospital	No	No	Yes	5	6	6	5	5	5	5	5	5	4	1	1	2	1	2	2	2	3	1	0	1	0	0	1	0	1	0	0	0	0	0	0	0	0
26-34	Urban	High School	Not Employed	Employed	More female babies	2 to 6 years	50,000 – 1 lac PKR	With Spouse’s extended family	9 months	Female	Simple Vaginal delivery (Normal)	Private hospital	Yes	No	Yes	6	5	5	5	5	6	5	5	5	5	2	1	2	2	2	2	2	2	1	0	1	0	0	0	1	0	0	0	0	0	0	2	3	3
26-34	Urban	Bachelors	Employed	Employed	Equal number of male and female babies	More than 6 years	50,000 – 1 lac PKR	With Spouse’s extended family	9 months	Female	C- section	Government hospital	No	Yes	Yes	3	3	5	3	3	3	5	3	3	3	2	1	3	2	2	2	2	1	1	0	1	1	0	0	0	0	0	0	0	0	0	2	2	2
35-44	Urban	High School	Not Employed	Employed	More male babies	2 to 6 years	26,000 – 50,000	With Spouse’s extended family	9 months	male	Simple Vaginal delivery (Normal)	Government hospital	No	No	Yes	3	3	3	3	3	3	3	3	3	3	1	2	2	2	2	2	1	1	2	2	1	1	0	0	0	0	0	0	0	0	0	0	0	0
35-44	Urban	Middle	Not Employed	Employed	Equal number of male and female babies	More than 6 years	26,000 – 50,000	Own house	9 months	Female	Simple Vaginal delivery (Normal)	Government hospital	No	No	Yes	5	5	5	5	5	5	5	5	5	5	2	1	2	2	2	2	2	2	1	0	1	1	0	0	0	0	0	0	0	0	0	2	0	2
45+	Urban	Primary	Employed	Not Employed	More male babies	2 to 6 years	26,000 – 50,000	Own house	9 months	male	Simple Vaginal delivery (Normal)	Government hospital	No	No	Yes	5	5	3	3	3	3	3	3	3	3	2	1	2	1	2	2	1	2	3	3	1	1	0	0	1	0	0	0	1	0	0	2	3	3
35-44	Urban	No Formal education	Not Employed	Not Employed	More female babies	More than 6 years	50,000 – 1 lac PKR	With Spouse’s extended family	9 months	Female	C- section	Government hospital	No	No	Yes	3	5	5	5	5	1	2	3	7	4	2	1	2	1	2	3	1	2	2	2	1	0	0	0	0	0	0	0	0	1	1	2	1	2
35-44	Urban	High School	Not Employed	Employed	Equal number of male and female babies	More than 6 years	50,000 – 1 lac PKR	Own house	9 months	Female	Simple Vaginal delivery (Normal)	Private hospital	No	Yes	Yes	3	5	5	5	5	5	5	5	5	5	0	1	3	1	1	2	2	2	1	0	1	0	0	1	0	0	1	0	0	0	0	2	1	1
35-44	Urban	High School	Not Employed	Employed	More female babies	2 to 6 years	26,000 – 50,000	With Spouse’s extended family	Less than 9 months	Female	Simple Vaginal delivery (Normal)	Private hospital	Yes	No	Yes	3	3	3	3	3	3	3	3	3	3	1	1	1	2	2	1	2	1	1	1	1	0	0	0	1	0	0	0	0	0	0	2	3	3
26-34	Urban	High School	Not Employed	Employed	Equal number of male and female babies	More than 6 years	50,000 – 1 lac PKR	With Spouse’s extended family	Less than 9 months	Female	Simple Vaginal delivery (Normal)	Private hospital	No	No	Yes	1	1	3	5	7	7	1	6	4	7	2	1	2	2	2	2	2	2	2	0	1	0	1	0	0	0	0	0	0	0	0	3	3	3
26-34	Urban	No Formal education	Not Employed	Employed	Equal number of male and female babies	More than 6 years	26,000 – 50,000	With Spouse’s extended family	9 months	Female	C- section	Government hospital	No	No	Yes	5	5	3	5	5	5	5	5	5	5	2	1	2	2	2	2	2	3	2	3	1	1	1	0	0	0	0	0	0	0	0	2	2	1
26-34	Urban	No Formal education	Not Employed	Employed	More male babies	More than 6 years	26,000 – 50,000	Own house	9 months	male	C- section	Government hospital	No	No	Yes	2	5	5	5	5	5	5	5	5	5	2	1	2	1	2	2	2	2	2	2	1	1	0	0	0	0	0	0	0	0	1	0	0	0
35-44	Urban	Middle	Not Employed	Employed	Equal number of male and female babies	More than 6 years	26,000 – 50,000	With Spouse’s extended family	9 months	male	C- section	Government hospital	No	No	Yes	2	6	2	6	4	4	4	4	5	4	3	3	2	3	2	3	3	3	3	0	1	0	0	1	0	0	0	0	0	0	0	0	3	3
35-44	Urban	Primary	Not Employed	Not Employed	More female babies	More than 6 years	25,000 PKR or less	With Spouse’s extended family	9 months	male	Simple Vaginal delivery (Normal)	Government hospital	No	No	Yes	5	5	5	5	5	5	5	5	5	5	2	1	0	2	2	3	3	2	2	0	1	1	0	0	0	0	0	0	0	0	0	3	0	3
35-44	Urban	No Formal education	Not Employed	Employed	More female babies	More than 6 years	26,000 – 50,000	With Spouse’s extended family	9 months	Female	Simple Vaginal delivery (Normal)	Government hospital	No	No	Yes	5	5	5	5	5	5	5	5	5	5	1	2	3	2	2	2	2	2	2	2	1	0	1	1	0	0	0	0	0	0	0	3	2	3
26-34	Urban	High School	Not Employed	Not Employed	More female babies	2 to 6 years	25,000 PKR or less	With Spouse’s extended family	9 months	Female	Simple Vaginal delivery (Normal)	Government hospital	No	Yes	Yes	3	5	3	3	4	4	4	4	4	4	2	1	3	2	2	1	1	2	1	2	1	0	0	0	1	0	0	0	0	0	0	3	2	3
35-44	Urban	High School	Not Employed	Employed	More male babies	More than 6 years	50,000 – 1 lac PKR	With Spouse’s extended family	9 months	male	C- section	Government hospital	No	No	Yes	5	5	5	6	5	5	6	5	6	5	1	2	2	2	2	2	3	3	1	3	1	1	0	0	0	0	0	0	0	0	0	3	3	3
35-44	Urban	High School	Not Employed	Employed	More female babies	More than 6 years	50,000 – 1 lac PKR	With Spouse’s extended family	9 months	male	Simple Vaginal delivery (Normal)	Government hospital	No	Yes	Yes	3	3	5	5	3	3	5	3	3	3	2	1	3	2	3	2	3	3	2	0	1	1	0	1	1	0	0	0	0	0	0	2	2	2
26-34	Urban	High School	Not Employed	Employed	More female babies	More than 6 years	26,000 – 50,000	With Spouse’s extended family	9 months	male	C- section	Government hospital	No	No	Yes	3	6	6	6	4	4	5	5	5	4	1	2	2	2	2	2	2	2	2	2	1	1	0	0	0	0	0	0	0	0	0	2	2	2
35-44	Urban	Middle	Not Employed	Employed	Equal number of male and female babies	More than 6 years	26,000 – 50,000	With Spouse’s extended family	9 months	male	C- section	Government hospital	No	No	Yes	5	5	5	5	5	5	5	5	5	5	2	2	2	2	2	3	2	3	2	0	1	1	0	0	0	0	0	0	0	0	0	0	0	0
35-44	Urban	Primary	Not Employed	Employed	More female babies	More than 6 years	26,000 – 50,000	With Spouse’s extended family	9 months	Female	Simple Vaginal delivery (Normal)	Government hospital	No	No	Yes	1	6	5	6	5	5	6	5	6	5	1	1	2	2	2	2	2	2	2	2	1	0	0	1	1	0	0	0	0	0	0	2	2	0
35-44	Urban	High School	Not Employed	Employed	Equal number of male and female babies	More than 6 years	50,000 – 1 lac PKR	With Spouse’s extended family	9 months	Female	Simple Vaginal delivery (Normal)	Government hospital	No	No	Yes	5	5	5	5	5	5	4	5	5	4	2	1	1	1	3	3	3	3	2	2	1	1	0	0	0	0	0	0	0	0	0	3	3	3
26-34	Urban	Primary	Not Employed	Employed	Equal number of male and female babies	More than 6 years	26,000 – 50,000	With Spouse’s extended family	9 months	Female	C- section	Government hospital	No	No	Yes	5	5	5	5	5	5	5	5	5	5	2	2	2	2	2	2	2	2	2	2	1	1	0	1	0	0	0	0	0	0	0	2	2	2
35-44	Urban	No Formal education	Not Employed	Employed	More female babies	More than 6 years	26,000 – 50,000	With Spouse’s extended family	9 months	Female	C- section	Government hospital	No	No	Yes	5	5	5	5	5	5	5	5	5	5	2	2	2	2	2	2	3	2	1	1	1	1	0	0	0	0	0	0	0	0	0	2	2	2
35-44	Urban	Primary	Not Employed	Employed	More female babies	More than 6 years	50,000 – 1 lac PKR	With Spouse’s extended family	9 months	male	C- section	Government hospital	No	No	Yes	5	5	5	5	5	5	5	5	5	5	2	1	2	2	2	1	2	2	3	1	1	1	0	0	0	0	0	0	0	0	1	2	2	2
35-44	Urban	Primary	Not Employed	Employed	More female babies	More than 6 years	50,000 – 1 lac PKR	With Spouse’s extended family	9 months	Female	C- section	Government hospital	No	No	Yes	6	6	6	6	6	6	6	6	6	6	2	3	2	3	2	3	2	3	2	0	1	1	0	0	0	0	0	0	0	0	0	1	1	1
35-44	Urban	Bachelors	Employed	Employed	More female babies	More than 6 years	50,000 – 1 lac PKR	Own house	9 months	Female	C- section	Government hospital	No	No	Yes	5	5	5	5	5	5	5	5	5	5	2	2	2	2	1	2	2	2	2	2	1	1	1	0	0	0	0	0	0	0	0	3	3	3
16-25	Urban	Bachelors	Employed	Employed	More female babies	2 to 6 years	50,000 – 1 lac PKR	Own house	9 months	Female	C- section	Government hospital	No	No	Yes	5	5	5	5	5	5	5	5	5	5	2	2	2	1	2	2	2	1	2	1	1	1	0	0	0	0	0	0	0	0	0	3	3	0
16-25	Urban	High School	Not Employed	Employed	More male babies	2 to 6 years	50,000 – 1 lac PKR	With Spouse’s extended family	9 months	male	C- section	Government hospital	Yes	No	Yes	3	5	5	5	4	4	5	4	5	4	2	1	3	2	2	2	2	2	1	0	1	1	0	1	1	0	0	0	0	0	0	2	2	0
16-25	Urban	High School	Not Employed	Employed	More male babies	2 to 6 years	50,000 – 1 lac PKR	With Spouse’s extended family	9 months	male	C- section	Government hospital	Yes	No	Yes	3	5	5	5	4	4	5	4	5	4	2	2	1	2	1	1	2	2	1	1	1	1	0	1	1	0	0	0	0	0	0	2	2	2
35-44	Urban	High School	Not Employed	Employed	Equal number of male and female babies	More than 6 years	26,000 – 50,000	With Spouse’s extended family	9 months	Female	Simple Vaginal delivery (Normal)	Government hospital	No	No	Yes	5	5	6	5	5	5	5	5	5	5	2	1	2	2	2	2	1	3	2	0	1	0	0	1	0	0	0	0	0	0	0	3	3	2
35-44	Urban	High School	Not Employed	Employed	More male babies	More than 6 years	26,000 – 50,000	With Spouse’s extended family	Less than 9 months	male	C- section	Government hospital	No	No	Yes	1	6	6	6	6	6	6	6	6	5	2	1	3	1	2	1	1	2	2	0	1	1	0	0	0	0	0	0	1	0	0	3	3	3
35-44	Urban	Primary	Not Employed	Employed	More female babies	More than 6 years	26,000 – 50,000	With Spouse’s extended family	9 months	Female	C- section	Government hospital	No	Yes	Yes	5	6	5	5	5	5	5	5	5	5	2	1	1	2	3	2	2	2	2	0	1	0	0	0	1	0	0	0	0	0	0	2	2	2
35-44	Urban	No Formal education	Not Employed	Employed	Equal number of male and female babies	More than 6 years	26,000 – 50,000	With Spouse’s extended family	Less than 9 months	male	C- section	Government hospital	No	No	Yes	5	5	5	5	5	5	5	5	5	5	0	0	3	3	2	2	2	3	2	0	1	1	0	0	0	0	0	0	0	0	0	0	0	0
26-34	Urban	High School	Not Employed	Employed	Equal number of male and female babies	More than 6 years	25,000 PKR or less	With Spouse’s extended family	9 months	Female	C- section	Government hospital	No	No	Yes	3	5	5	5	3	3	5	3	7	3	2	2	2	1	3	2	2	1	3	1	1	0	0	1	0	0	0	0	0	0	0	3	3	3
35-44	Urban	High School	Not Employed	Not Employed	More female babies	More than 6 years	26,000 – 50,000	With Spouse’s extended family	9 months	Female	Simple Vaginal delivery (Normal)	Government hospital	No	No	Yes	5	5	5	5	5	5	5	5	5	5	2	2	2	1	2	3	1	3	3	1	1	0	0	1	0	0	0	0	0	0	0	3	2	2
26-34	Urban	High School	Not Employed	Employed	Equal number of male and female babies	More than 6 years	26,000 – 50,000	With Spouse’s extended family	9 months	Female	C- section	Government hospital	No	No	Yes	5	5	5	5	5	5	5	5	5	5	1	2	2	2	1	2	2	2	1	2	1	0	0	0	0	0	0	0	0	0	0	2	0	2
16-25	Urban	Middle	Not Employed	Not Employed	Equal number of male and female babies	2 to 6 years	26,000 – 50,000	Own house	9 months	male	C- section	Government hospital	No	No	Yes	5	5	5	5	5	5	5	5	5	5	2	1	2	2	1	1	3	3	1	0	1	0	0	0	0	0	0	0	0	0	0	2	2	2
16-25	Urban	High School	Not Employed	Not Employed	More male babies	2 to 6 years	25,000 PKR or less	With Spouse’s extended family	9 months	male	C- section	Government hospital	No	No	Yes	3	3	3	5	3	3	3	3	3	3	2	1	1	2	2	1	3	2	1	0	1	1	0	1	0	0	0	0	0	0	0	1	1	1
35-44	Urban	High School	Not Employed	Employed	Equal number of male and female babies	More than 6 years	26,000 – 50,000	With Spouse’s extended family	9 months	male	C- section	Government hospital	No	No	Yes	5	5	5	5	5	5	5	5	5	5	2	1	3	2	2	1	2	2	2	0	1	0	0	0	0	0	0	0	0	0	0	2	2	2
16-25	Urban	High School	Not Employed	Employed	Equal number of male and female babies	More than 6 years	26,000 – 50,000	With Spouse’s extended family	9 months	Female	C- section	Government hospital	No	No	Yes	5	5	5	5	3	5	5	5	5	5	0	0	1	1	3	0	2	2	2	2	1	1	1	0	0	0	0	0	0	0	0	2	2	2
26-34	Urban	High School	Not Employed	Employed	More female babies	More than 6 years	26,000 – 50,000	Own house	9 months	male	C- section	Government hospital	No	No	Yes	5	5	5	5	5	5	5	5	5	5	2	1	2	2	2	2	2	3	1	0	1	0	1	0	0	0	0	0	0	0	0	0	2	2
16-25	Urban	High School	Not Employed	Employed	More female babies	2 to 6 years	25,000 PKR or less	With Spouse’s extended family	9 months	Female	Simple Vaginal delivery (Normal)	Government hospital	Yes	No	Yes	3	5	5	5	5	5	5	5	5	5	2	1	2	1	1	2	1	1	1	0	1	1	0	0	0	0	0	0	0	0	0	2	2	2
26-34	Urban	High School	Not Employed	Employed	Equal number of male and female babies	More than 6 years	26,000 – 50,000	With Spouse’s extended family	9 months	Female	C- section	Government hospital	No	No	Yes	6	6	5	5	5	5	5	5	5	5	2	1	2	2	1	2	3	2	1	0	1	0	0	1	0	0	0	0	0	0	0	2	2	2
35-44	Urban	No Formal education	Not Employed	Employed	More female babies	More than 6 years	26,000 – 50,000	With Spouse’s extended family	9 months	Female	C- section	Government hospital	No	No	Yes	3	5	5	5	3	3	5	3	5	3	2	2	2	2	1	3	3	3	3	0	1	1	0	0	0	0	0	0	0	0	0	2	1	1
16-25	Rural	High School	Not Employed	Employed	More female babies	2 to 6 years	26,000 – 50,000	With Spouse’s extended family	9 months	male	C- section	Government hospital	No	No	Yes	5	5	5	3	5	4	6	4	4	4	1	2	1	1	2	0	0	3	3	1	1	0	0	0	1	0	0	0	0	0	0	1	1	1
16-25	Urban	High School	Not Employed	Employed	More male babies	2 to 6 years	26,000 – 50,000	With Spouse’s extended family	9 months	male	C- section	Government hospital	No	No	Yes	6	6	5	6	5	5	5	6	6	3	0	0	2	1	2	1	3	1	2	0	1	1	0	0	0	0	0	0	0	0	0	3	3	3
35-44	Urban	High School	Not Employed	Employed	More male babies	More than 6 years	26,000 – 50,000	With Spouse’s extended family	9 months	male	C- section	Government hospital	No	No	Yes	5	5	5	5	5	5	5	5	5	5	0	1	2	2	1	3	1	1	1	0	1	1	0	0	0	0	0	0	0	0	0	1	1	2
26-34	Urban	High School	Not Employed	Employed	More female babies	2 to 6 years	26,000 – 50,000	With Spouse’s extended family	9 months	Female	C- section	Government hospital	No	No	Yes	6	6	6	6	2	2	6	3	5	3	1	2	1	1	2	1	1	1	2	0	1	0	0	0	0	0	0	0	0	0	0	2	3	3
26-34	Urban	High School	Not Employed	Employed	More male babies	2 to 6 years	25,000 PKR or less	With Spouse’s extended family	9 months	Female	Simple Vaginal delivery (Normal)	Government hospital	No	No	Yes	4	5	5	5	5	5	5	5	6	6	2	1	1	1	1	2	2	2	2	0	1	1	0	0	0	0	0	0	0	0	0	2	1	1
16-25	Urban	Bachelors	Not Employed	Employed	More male babies	2 to 6 years	26,000 – 50,000	With Spouse’s extended family	9 months	male	C- section	Government hospital	Yes	No	Yes	4	5	5	5	5	5	3	4	5	4	1	1	3	2	2	2	1	2	2	0	1	0	0	1	0	0	0	0	0	0	0	2	0	2
26-34	Urban	Primary	Not Employed	Employed	Equal number of male and female babies	More than 6 years	25,000 PKR or less	With Spouse’s extended family	9 months	male	C- section	Government hospital	No	No	Yes	5	5	5	5	5	5	5	5	5	5	2	1	1	2	2	1	2	3	3	3	1	1	1	0	0	0	0	0	0	0	0	2	2	2
35-44	Urban	No Formal education	Not Employed	Employed	More female babies	More than 6 years	26,000 – 50,000	Own house	9 months	Female	C- section	Government hospital	No	No	Yes	3	3	5	3	5	5	5	5	5	3	2	1	3	1	2	2	1	3	3	2	1	0	0	1	0	0	0	0	0	0	0	0	0	0
26-34	Urban	No Formal education	Not Employed	Employed	More female babies	2 to 6 years	26,000 – 50,000	Own house	9 months	Female	C- section	Government hospital	No	No	Yes	3	5	5	3	5	6	6	6	6	4	1	2	2	2	3	2	3	1	2	0	1	1	0	0	0	0	0	0	0	0	0	1	1	1
26-34	Urban	Primary	Not Employed	Employed	More male babies	More than 6 years	25,000 PKR or less	Own house	9 months	male	C- section	Government hospital	No	No	Yes	3	3	5	3	5	5	5	5	3	5	1	1	2	1	2	1	1	2	2	1	1	0	1	1	0	0	0	0	0	0	0	2	2	2
26-34	Urban	High School	Not Employed	Employed	More female babies	More than 6 years	25,000 PKR or less	With Spouse’s extended family	9 months	male	C- section	Government hospital	No	No	Yes	3	3	3	3	4	4	5	4	3	4	2	1	2	2	1	2	2	3	1	0	1	0	0	0	0	0	0	0	0	0	1	0	0	0
35-44	Urban	High School	Not Employed	Employed	Equal number of male and female babies	2 to 6 years	26,000 – 50,000	With Spouse’s extended family	9 months	Female	Simple Vaginal delivery (Normal)	Government hospital	No	No	Yes	5	5	5	5	5	5	3	3	5	3	1	2	3	1	2	0	3	2	1	0	1	0	0	0	0	0	0	0	0	0	0	2	0	0
35-44	Urban	No Formal education	Not Employed	Employed	More male babies	More than 6 years	25,000 PKR or less	Own house	9 months	male	C- section	Government hospital	No	No	Yes	2	2	5	2	5	4	5	4	4	4	2	1	2	2	2	2	2	1	2	0	1	1	0	0	0	0	0	0	0	0	0	2	1	2
26-34	Urban	Middle	Not Employed	Employed	More female babies	2 to 6 years	26,000 – 50,000	With Spouse’s extended family	9 months	male	C- section	Government hospital	No	No	Yes	6	6	5	6	5	5	5	6	6	5	2	1	2	2	3	1	3	2	2	0	1	1	0	1	0	0	0	0	0	0	0	0	0	1
16-25	Urban	Middle	Not Employed	Not Employed	More male babies	2 to 6 years	25,000 PKR or less	Own house	9 months	male	C- section	Government hospital	Yes	No	Yes	5	5	4	5	5	5	6	5	5	5	2	2	2	1	2	1	1	2	1	0	1	1	1	1	0	0	0	0	0	0	0	2	0	0
26-34	Urban	Primary	Not Employed	Not Employed	More female babies	More than 6 years	25,000 PKR or less	Own house	9 months	male	C- section	Government hospital	No	No	Yes	4	4	5	6	4	5	5	5	5	5	2	1	1	1	2	0	1	1	3	0	1	1	0	0	0	0	0	0	0	0	1	0	0	0
26-34	Urban	Middle	Not Employed	Not Employed	More female babies	More than 6 years	25,000 PKR or less	With Spouse’s extended family	9 months	male	C- section	Government hospital	No	No	Yes	5	5	5	5	5	5	5	5	5	5	0	1	3	3	2	2	2	2	2	0	1	0	0	0	1	0	0	0	0	0	0	2	0	2
35-44	Urban	High School	Not Employed	Employed	More female babies	2 to 6 years	26,000 – 50,000	Own house	9 months	male	C- section	Government hospital	No	No	Yes	5	6	5	6	5	5	5	5	6	5	2	1	1	1	1	1	2	2	1	0	1	0	0	1	0	0	0	0	0	0	0	0	0	0
26-34	Urban	Bachelors	Employed	Not Employed	More female babies	More than 6 years	25,000 PKR or less	With Spouse’s extended family	Less than 9 months	Female	C- section	Private hospital	No	Yes	Yes	5	6	6	6	5	5	6	5	6	5	0	1	1	2	2	1	2	1	2	1	1	1	0	0	0	0	0	0	0	0	0	1	1	1
35-44	Urban	Primary	Not Employed	Employed	More male babies	More than 6 years	26,000 – 50,000	With Spouse’s extended family	9 months	male	C- section	Private hospital	No	No	Yes	5	5	3	5	5	5	5	5	5	5	2	1	1	1	2	1	2	2	2	0	1	1	0	0	0	0	0	0	0	0	0	2	0	0
35-44	Urban	Middle	Not Employed	Employed	More male babies	More than 6 years	26,000 – 50,000	With Spouse’s extended family	9 months	male	C- section	Government hospital	No	No	Yes	5	2	5	5	5	5	5	5	5	5	0	2	1	2	2	1	1	2	1	2	1	1	0	1	0	0	0	0	0	0	0	0	0	0
16-25	Urban	Bachelors	Not Employed	Employed	More female babies	2 to 6 years	26,000 – 50,000	With Spouse’s extended family	9 months	Female	C- section	Private hospital	Yes	No	Yes	1	6	6	6	6	6	6	5	6	5	0	0	3	2	2	2	2	2	2	2	1	1	1	1	0	0	0	0	0	0	0	3	2	3
26-34	Urban	High School	Not Employed	Employed	Equal number of male and female babies	2 to 6 years	25,000 PKR or less	With Spouse’s extended family	9 months	Female	C- section	Private hospital	No	No	Yes	5	6	6	6	6	6	6	6	6	6	2	1	1	2	2	0	2	0	0	2	1	0	0	1	1	0	0	0	0	0	0	2	1	1
35-44	Urban	Primary	Not Employed	Employed	More female babies	2 to 6 years	25,000 PKR or less	With Spouse’s extended family	9 months	Female	C- section	Private hospital	No	No	Yes	5	6	6	6	6	6	6	6	6	6	2	2	1	0	2	1	2	2	1	1	1	1	0	0	0	0	0	0	0	0	0	1	1	1
26-34	Urban	High School	Not Employed	Employed	More male babies	More than 6 years	26,000 – 50,000	Own house	9 months	male	C- section	Private hospital	No	No	Yes	5	6	5	5	5	5	5	5	5	5	0	2	2	2	2	0	2	2	2	2	1	0	0	0	0	0	0	0	0	0	1	3	3	3
35-44	Urban	Bachelors	Not Employed	Not Employed	More female babies	More than 6 years	50,000 – 1 lac PKR	Own house	9 months	Female	C- section	Private hospital	No	No	Yes	5	5	6	5	6	5	5	5	5	5	1	1	2	0	2	1	3	2	1	1	1	1	1	0	0	0	0	0	0	0	0	1	1	1
26-34	Urban	High School	Not Employed	Employed	More female babies	More than 6 years	26,000 – 50,000	Own house	9 months	Female	C- section	Private hospital	No	No	Yes	5	5	6	5	6	6	6	6	6	6	1	2	2	2	2	1	1	2	1	2	1	1	0	1	0	0	0	0	0	0	0	2	2	2
35-44	Urban	No Formal education	Not Employed	Employed	More female babies	More than 6 years	26,000 – 50,000	With Spouse’s extended family	9 months	Female	C- section	Private hospital	No	No	Yes	1	5	6	6	5	5	6	6	5	6	3	2	1	2	3	1	1	2	1	2	1	1	0	1	0	0	0	1	0	0	0	0	0	0
26-34	Urban	High School	Not Employed	Employed	More female babies	More than 6 years	26,000 – 50,000	With Spouse’s extended family	9 months	Female	C- section	Private hospital	No	No	Yes	5	5	7	5	5	5	6	3	5	5	2	1	2	1	2	2	2	1	2	1	1	1	0	0	0	0	0	1	0	0	0	0	2	3
26-34	Urban	Primary	Not Employed	Employed	Equal number of male and female babies	More than 6 years	26,000 – 50,000	With Spouse’s extended family	9 months	male	C- section	Private hospital	No	No	Yes	5	5	6	5	5	3	6	5	5	3	2	1	2	3	1	1	2	2	1	1	1	1	0	0	0	0	0	0	0	0	0	0	2	0
16-25	Urban	Middle	Not Employed	Employed	More male babies	2 to 6 years	25,000 PKR or less	With Spouse’s extended family	9 months	male	C- section	Private hospital	Yes	No	Yes	7	5	6	6	6	6	6	6	5	5	1	3	1	1	1	1	2	2	2	0	1	0	0	1	1	0	0	0	0	0	1	2	1	2
26-34	Urban	Primary	Not Employed	Employed	Equal number of male and female babies	More than 6 years	50,000 – 1 lac PKR	With Spouse’s extended family	9 months	Female	C- section	Government hospital	No	Yes	Yes	3	6	5	5	5	5	6	6	6	5	2	1	1	2	2	1	2	2	1	2	1	0	0	1	0	1	0	0	0	0	0	0	0	0
16-25	Urban	Bachelors	Not Employed	Employed	More female babies	2 to 6 years	26,000 – 50,000	Own house	9 months	male	C- section	Private hospital	No	No	Yes	5	5	5	5	6	6	5	6	6	5	2	1	3	2	2	1	2	1	3	1	1	1	1	0	0	0	0	0	0	0	0	0	0	0
26-34	Urban	Masters or higher	Employed	Employed	More female babies	2 to 6 years	26,000 – 50,000	Own house	9 months	Female	C- section	Private hospital	No	No	Yes	6	6	5	5	3	3	5	3	5	3	2	1	1	1	2	1	2	1	2	1	1	0	0	0	0	1	0	0	0	0	0	0	2	0
26-34	Urban	No Formal education	Not Employed	Employed	Equal number of male and female babies	More than 6 years	26,000 – 50,000	With Spouse’s extended family	9 months	male	C- section	Private hospital	No	No	Yes	3	5	5	5	5	4	5	4	5	4	2	1	1	2	1	1	2	1	1	0	1	1	0	0	0	0	0	0	0	0	0	3	2	3
35-44	Urban	Primary	Not Employed	Employed	Equal number of male and female babies	2 to 6 years	26,000 – 50,000	With Spouse’s extended family	9 months	Female	Simple Vaginal delivery (Normal)	Government hospital	No	No	Yes	5	5	5	5	4	4	3	4	4	4	2	1	2	2	2	1	1	2	2	1	1	1	0	0	0	0	0	0	0	0	0	2	1	0
26-34	Urban	Bachelors	Not Employed	Employed	More male babies	More than 6 years	26,000 – 50,000	With Spouse’s extended family	9 months	Female	C- section	Government hospital	No	Yes	Yes	5	5	5	5	5	5	5	5	5	7	1	2	1	1	2	2	1	1	1	1	1	1	1	0	0	0	0	0	0	0	0	2	3	3
16-25	Urban	No Formal education	Not Employed	Employed	More male babies	More than 6 years	26,000 – 50,000	Own house	9 months	male	C- section	Private hospital	Yes	No	Yes	5	6	6	5	6	5	6	6	5	5	1	2	2	2	2	1	0	1	2	2	1	1	0	0	0	0	0	0	0	0	0	0	0	0
26-34	Urban	No Formal education	Not Employed	Not Employed	Equal number of male and female babies	More than 6 years	26,000 – 50,000	With Spouse’s extended family	9 months	Female	C- section	Private hospital	No	No	Yes	5	5	5	5	5	5	5	5	5	5	2	1	3	1	0	2	2	1	2	0	1	0	0	0	1	0	0	0	0	0	0	2	2	2
16-25	Urban	Masters or higher	Employed	Employed	More female babies	2 to 6 years	26,000 – 50,000	Own house	Less than 9 months	Female	C- section	Private hospital	Yes	Yes	Yes	6	6	5	6	5	5	5	5	6	5	2	1	2	2	2	2	1	2	2	2	1	1	0	0	0	0	0	0	0	0	0	2	1	2
16-25	Urban	High School	Not Employed	Employed	More female babies	More than 6 years	26,000 – 50,000	With Spouse’s extended family	9 months	Female	C- section	Private hospital	No	No	Yes	5	5	6	5	5	6	5	3	5	3	2	1	2	2	1	1	2	1	3	1	1	1	0	0	0	0	0	1	0	0	0	0	2	0
16-25	Urban	Bachelors	Employed	Employed	More male babies	Less than one year	26,000 – 50,000	Own house	Less than 9 months	male	C- section	Private hospital	Yes	No	Yes	3	4	5	5	4	5	5	4	5	4	2	1	1	2	3	0	2	2	1	0	1	0	0	1	0	0	0	0	0	0	1	0	0	3
26-34	Urban	Primary	Employed	Not Employed	More female babies	More than 6 years	50,000 – 1 lac PKR	Own house	Less than 9 months	Female	C- section	Private hospital	No	No	Yes	5	5	6	5	5	3	5	3	5	3	1	2	1	2	1	3	1	2	2	0	1	1	0	0	1	0	0	1	0	0	0	1	3	2
35-44	Urban	Bachelors	Not Employed	Employed	Equal number of male and female babies	More than 6 years	26,000 – 50,000	Own house	9 months	male	C- section	Private hospital	No	No	Yes	2	5	6	5	5	5	5	5	5	5	2	1	0	3	0	2	3	3	2	2	1	1	1	1	1	0	0	1	0	0	0	0	0	0
35-44	Urban	High School	Not Employed	Employed	More female babies	More than 6 years	26,000 – 50,000	With Spouse’s extended family	9 months	Female	C- section	Private hospital	No	No	Yes	5	5	5	5	5	5	3	5	5	5	2	1	3	3	1	1	3	2	3	3	1	1	1	0	0	0	0	0	0	0	0	3	3	2
26-34	Urban	High School	Not Employed	Employed	Equal number of male and female babies	More than 6 years	26,000 – 50,000	With Spouse’s extended family	9 months	male	C- section	Private hospital	No	No	Yes	5	5	5	5	5	3	5	5	5	5	2	1	3	3	1	1	2	2	1	0	1	1	0	0	0	0	0	1	1	0	0	2	3	2
35-44	Urban	High School	Not Employed	Employed	More female babies	More than 6 years	50,000 – 1 lac PKR	Own house	Less than 9 months	Female	C- section	Private hospital	No	Yes	Yes	5	5	6	7	5	5	5	5	5	5	2	1	3	2	2	3	0	0	3	1	1	0	0	1	1	0	0	1	0	0	0	0	0	0
26-34	Urban	Primary	Not Employed	Employed	More female babies	More than 6 years	50,000 – 1 lac PKR	Own house	Less than 9 months	male	C- section	Private hospital	No	No	Yes	5	5	5	5	5	3	5	3	5	3	2	1	3	2	2	2	1	1	1	2	1	1	0	0	0	0	0	1	1	0	0	1	2	3
26-34	Urban	High School	Not Employed	Employed	More female babies	More than 6 years	26,000 – 50,000	Own house	9 months	Female	C- section	Private hospital	No	No	Yes	1	3	4	3	3	3	3	3	3	3	1	2	2	2	2	1	2	1	2	1	1	0	0	0	0	0	0	0	0	0	1	0	0	0
26-34	Urban	High School	Not Employed	Employed	More female babies	More than 6 years	26,000 – 50,000	With Spouse’s extended family	9 months	Female	C- section	Private hospital	No	No	Yes	6	6	6	6	5	5	5	5	6	5	3	3	3	1	2	1	2	2	2	2	1	0	0	0	0	0	0	0	0	0	0	1	1	0
26-34	Urban	High School	Not Employed	Employed	Equal number of male and female babies	2 to 6 years	26,000 – 50,000	With Spouse’s extended family	9 months	Female	Simple Vaginal delivery (Normal)	Private hospital	No	No	Yes	1	1	5	4	3	3	3	3	3	3	2	1	1	3	2	1	1	2	1	1	1	0	0	1	0	0	0	0	0	0	0	1	2	0
26-34	Urban	High School	Not Employed	Employed	More female babies	More than 6 years	50,000 – 1 lac PKR	With Spouse’s extended family	9 months	male	C- section	Private hospital	No	No	Yes	6	5	4	4	4	4	6	4	5	4	1	2	2	1	2	2	2	2	2	1	1	1	0	0	0	0	0	0	0	0	0	3	0	0
26-34	Urban	Bachelors	Employed	Employed	More female babies	More than 6 years	50,000 – 1 lac PKR	With Spouse’s extended family	9 months	Female	C- section	Private hospital	No	No	Yes	5	5	5	5	3	3	5	5	5	5	2	1	1	2	1	1	1	1	2	0	1	0	1	0	0	1	0	0	0	0	0	0	0	0
35-44	Urban	High School	Not Employed	Not Employed	More female babies	More than 6 years	26,000 – 50,000	Own house	9 months	male	C- section	Private hospital	No	Yes	Yes	2	3	5	6	6	5	5	5	4	5	3	3	2	2	2	1	3	1	2	1	1	0	0	0	1	0	0	0	0	0	0	2	2	1
16-25	Urban	Bachelors	Not Employed	Employed	More male babies	2 to 6 years	26,000 – 50,000	Own house	9 months	male	C- section	Private hospital	Yes	No	Yes	5	5	5	6	5	6	5	5	5	5	2	0	1	2	3	0	0	2	3	2	1	0	1	1	0	0	0	0	0	0	1	0	0	0
45+	Urban	No Formal education	Not Employed	Employed	Equal number of male and female babies	2 to 6 years	26,000 – 50,000	With Spouse’s extended family	9 months	Female	C- section	Private hospital	No	No	Yes	5	5	5	5	5	5	5	2	5	1	0	1	1	1	3	3	2	1	2	0	1	0	0	0	0	0	0	0	0	0	0	0	0	3
35-44	Urban	High School	Not Employed	Employed	More female babies	More than 6 years	25,000 PKR or less	With Spouse’s extended family	9 months	Female	C- section	Private hospital	No	Yes	Yes	2	2	5	2	5	5	5	5	3	5	1	3	2	2	2	3	3	2	3	0	1	0	0	1	0	0	0	0	0	0	0	3	2	2
35-44	Urban	High School	Not Employed	Employed	More male babies	More than 6 years	50,000 – 1 lac PKR	Own house	9 months	Female	C- section	Private hospital	No	No	Yes	5	5	2	5	4	4	5	4	5	4	2	1	3	3	3	2	1	2	0	0	1	0	0	0	0	0	0	0	0	0	1	3	3	3
16-25	Urban	Masters or higher	Not Employed	Employed	More female babies	More than 6 years	50,000 – 1 lac PKR	With Spouse’s extended family	Less than 9 months	male	C- section	Private hospital	No	Yes	Yes	5	5	5	5	4	4	5	4	5	4	2	1	2	2	2	3	3	2	2	0	1	1	0	0	0	0	0	0	0	0	0	2	2	2
35-44	Rural	No Formal education	Not Employed	Employed	Equal number of male and female babies	More than 6 years	50,000 – 1 lac PKR	With Spouse’s extended family	9 months	Female	C- section	Private hospital	No	Yes	Yes	5	6	6	6	5	5	5	5	5	5	1	0	2	1	2	3	2	1	3	0	1	1	0	0	0	0	0	0	0	0	0	2	2	2
35-44	Urban	High School	Not Employed	Employed	More female babies	More than 6 years	26,000 – 50,000	With Spouse’s extended family	9 months	Female	C- section	Private hospital	No	No	Yes	5	5	5	5	5	4	4	4	5	4	1	1	3	3	1	2	2	1	2	0	1	0	0	0	0	0	0	0	0	0	0	3	0	0
16-25	Rural	Bachelors	Not Employed	Employed	Equal number of male and female babies	2 to 6 years	25,000 PKR or less	With Spouse’s extended family	Less than 9 months	Female	C- section	Private hospital	Yes	No	Yes	3	3	5	5	5	5	5	5	5	5	2	1	1	1	1	2	1	1	2	0	1	0	0	0	0	0	0	0	1	0	0	3	1	2
35-44	Rural	High School	Not Employed	Employed	More female babies	More than 6 years	26,000 – 50,000	With Spouse’s extended family	9 months	Female	C- section	Private hospital	No	Yes	Yes	5	5	5	3	5	5	5	5	1	5	2	1	2	1	2	2	1	3	2	3	1	0	0	0	0	0	0	0	0	0	0	0	0	0
26-34	Urban	Bachelors	Employed	Employed	More female babies	2 to 6 years	26,000 – 50,000	With Spouse’s extended family	9 months	Female	Simple Vaginal delivery (Normal)	Private hospital	No	No	Yes	2	5	5	3	3	3	5	3	3	5	3	3	2	2	2	2	2	2	1	3	1	1	0	0	0	0	0	0	0	0	0	3	0	0
35-44	Rural	Middle	Not Employed	Employed	More female babies	More than 6 years	25,000 PKR or less	With Spouse’s extended family	9 months	Female	Simple Vaginal delivery (Normal)	Private hospital	No	No	Yes	5	5	5	5	5	5	5	5	5	5	1	2	2	2	0	3	2	2	2	0	1	0	0	1	0	0	0	0	1	0	0	3	0	0
35-44	Urban	High School	Not Employed	Employed	More female babies	2 to 6 years	25,000 PKR or less	With Spouse’s extended family	9 months	Female	C- section	Private hospital	No	Yes	Yes	5	5	5	5	5	5	5	5	5	5	1	1	2	1	2	2	1	1	1	0	1	0	0	0	0	0	0	0	0	0	0	0	0	0
35-44	Urban	Masters or higher	Employed	Employed	More male babies	More than 6 years	50,000 – 1 lac PKR	Own house	9 months	male	Simple Vaginal delivery (Normal)	Private hospital	No	No	Yes	5	5	5	5	5	3	5	5	3	3	1	2	2	2	1	2	0	0	3	2	1	0	0	0	1	0	0	1	0	0	0	0	0	0
26-34	Urban	High School	Not Employed	Employed	Equal number of male and female babies	More than 6 years	26,000 – 50,000	Own house	9 months	Female	C- section	Private hospital	No	Yes	Yes	5	6	6	5	5	5	5	5	5	5	2	1	1	1	2	2	2	1	1	0	1	0	0	0	0	0	0	0	0	0	1	0	0	0
16-25	Urban	Middle	Not Employed	Employed	More male babies	More than 6 years	More than 1 lac PKR	With Spouse’s extended family	9 months	Female	C- section	Private hospital	No	No	Yes	3	7	5	7	3	3	5	5	5	5	2	1	2	2	1	2	3	1	1	0	1	1	0	0	0	0	0	0	0	0	0	3	0	2
45+	Urban	Bachelors	Not Employed	Employed	Equal number of male and female babies	More than 6 years	50,000 – 1 lac PKR	Own house	9 months	Female	C- section	Private hospital	No	No	Yes	5	5	5	5	5	4	5	6	5	6	1	3	3	3	2	3	3	2	2	1	1	1	1	0	0	0	0	1	0	0	0	0	0	0
26-34	Urban	Masters or higher	Not Employed	Employed	More female babies	More than 6 years	26,000 – 50,000	With Spouse’s extended family	Less than 9 months	Female	C- section	Private hospital	No	No	Yes	2	5	5	3	3	3	5	3	3	3	1	2	2	1	2	0	1	3	2	0	1	0	0	0	0	0	0	0	0	0	0	0	0	0
26-34	Urban	High School	Employed	Employed	More male babies	More than 6 years	50,000 – 1 lac PKR	Own house	9 months	male	C- section	Private hospital	No	No	Yes	3	3	3	3	3	3	3	1	3	2	2	1	3	1	1	3	2	2	1	2	1	0	0	0	0	1	0	0	0	0	0	1	1	0
16-25	Urban	Bachelors	Employed	Employed	Equal number of male and female babies	More than 6 years	50,000 – 1 lac PKR	Own house	9 months	male	C- section	Private hospital	No	No	Yes	3	3	3	5	5	5	5	5	5	5	0	0	3	3	2	2	1	2	3	0	1	1	0	0	1	1	0	0	0	0	0	0	0	0
35-44	Rural	High School	Not Employed	Employed	More female babies	More than 6 years	26,000 – 50,000	With Spouse’s extended family	9 months	Female	C- section	Private hospital	No	No	Yes	5	5	5	6	4	5	4	6	5	5	2	1	2	0	1	3	3	2	2	0	1	1	0	0	0	0	0	0	0	0	0	2	0	0
26-34	Urban	High School	Employed	Employed	Equal number of male and female babies	2 to 6 years	26,000 – 50,000	With Spouse’s extended family	9 months	male	C- section	Private hospital	No	Yes	Yes	5	6	6	5	3	3	5	5	5	5	2	1	1	2	1	1	1	1	1	1	1	1	0	0	0	0	0	0	0	0	0	2	2	1
16-25	Urban	No Formal education	Not Employed	Employed	More female babies	More than 6 years	25,000 PKR or less	With Spouse’s extended family	9 months	Female	C- section	Private hospital	Yes	No	Yes	5	5	5	5	3	3	3	3	3	3	1	2	2	2	2	1	2	2	1	3	1	0	0	0	0	0	0	0	0	0	1	0	0	0
45+	Rural	Primary	Not Employed	Not Employed	More female babies	More than 6 years	25,000 PKR or less	With Spouse’s extended family	9 months	Female	C- section	Private hospital	No	Yes	Yes	2	5	3	3	3	3	5	3	3	3	1	2	2	1	2	2	2	2	2	0	1	0	0	0	1	0	0	0	0	0	0	2	0	0
35-44	Urban	High School	Not Employed	Employed	Equal number of male and female babies	2 to 6 years	26,000 – 50,000	With Spouse’s extended family	Less than 9 months	Female	C- section	Private hospital	No	No	Yes	5	5	5	5	5	5	5	5	5	5	1	2	2	2	1	2	2	1	2	1	1	0	0	0	0	0	0	1	0	0	0	3	3	2
35-44	Urban	High School	Not Employed	Employed	Equal number of male and female babies	2 to 6 years	26,000 – 50,000	With Spouse’s extended family	9 months	Female	C- section	Private hospital	No	Yes	Yes	4	5	6	5	5	4	5	5	5	5	1	2	2	2	2	2	0	3	3	0	1	1	0	0	0	0	0	0	0	0	1	2	0	2
35-44	Urban	High School	Not Employed	Employed	Equal number of male and female babies	More than 6 years	26,000 – 50,000	With Spouse’s extended family	9 months	Female	C- section	Private hospital	No	Yes	Yes	5	3	3	5	3	3	6	4	5	4	1	1	2	1	1	2	1	2	2	2	1	0	0	0	0	0	0	0	0	0	0	0	3	2
26-34	Urban	Bachelors	Not Employed	Employed	More male babies	More than 6 years	26,000 – 50,000	With Spouse’s extended family	9 months	male	C- section	Government hospital	Yes	No	Yes	5	3	6	6	4	5	5	4	5	5	2	1	2	2	1	1	3	2	2	1	1	1	0	0	0	0	0	0	0	0	0	0	0	0
26-34	Urban	Masters or higher	Not Employed	Employed	More male babies	More than 6 years	26,000 – 50,000	With Spouse’s extended family	Less than 9 months	male	C- section	Private hospital	No	No	Yes	5	5	5	6	5	5	5	3	5	3	1	2	2	2	2	0	3	3	3	3	1	0	0	0	0	0	0	1	0	0	0	0	0	0
16-25	Rural	Middle	Not Employed	Employed	Equal number of male and female babies	More than 6 years	26,000 – 50,000	With Spouse’s extended family	Less than 9 months	Female	C- section	Private hospital	No	Yes	Yes	2	3	3	5	4	4	5	4	5	4	1	1	1	1	1	2	2	2	1	2	1	0	0	1	0	0	0	1	0	0	0	0	0	0
35-44	Urban	High School	Not Employed	Employed	More female babies	More than 6 years	26,000 – 50,000	With Spouse’s extended family	9 months	Female	C- section	Private hospital	No	Yes	Yes	3	5	5	5	5	5	5	5	5	5	1	2	2	0	1	2	2	1	1	1	1	0	0	1	0	0	0	0	0	0	0	2	1	1
16-25	Urban	No Formal education	Not Employed	Not Employed	Equal number of male and female babies	2 to 6 years	25,000 PKR or less	With Spouse’s extended family	Less than 9 months	Female	C- section	Private hospital	No	Yes	Yes	1	2	6	3	5	5	5	5	3	3	3	1	3	2	2	3	3	2	3	0	1	0	0	1	0	0	0	0	0	0	0	0	0	0
35-44	Urban	Middle	Not Employed	Employed	More female babies	More than 6 years	26,000 – 50,000	Own house	9 months	Female	C- section	Private hospital	No	No	Yes	5	5	6	5	4	3	5	3	5	3	1	2	1	1	3	2	2	2	2	1	1	1	0	0	0	0	0	0	0	0	0	0	0	3
26-34	Urban	Primary	Not Employed	Employed	More female babies	More than 6 years	25,000 PKR or less	With Spouse’s extended family	9 months	Female	C- section	Private hospital	No	No	Yes	5	5	5	5	4	4	5	4	5	2	2	3	1	0	1	1	1	2	1	1	1	0	0	1	0	0	0	0	0	0	0	0	0	0
26-34	Urban	High School	Not Employed	Employed	Equal number of male and female babies	More than 6 years	26,000 – 50,000	With Spouse’s extended family	9 months	Female	C- section	Private hospital	No	No	Yes	3	4	5	5	5	5	5	5	5	5	2	1	1	2	0	3	1	0	3	0	1	0	0	0	0	0	0	0	0	0	1	0	0	0
16-25	Urban	Bachelors	Not Employed	Employed	More male babies	2 to 6 years	26,000 – 50,000	With Spouse’s extended family	9 months	male	C- section	Private hospital	Yes	No	Yes	6	6	5	6	5	5	6	5	5	5	2	0	2	2	2	1	2	1	3	1	1	1	0	1	0	1	0	0	0	0	0	2	1	1
35-44	Urban	High School	Not Employed	Employed	More female babies	More than 6 years	26,000 – 50,000	With Spouse’s extended family	Less than 9 months	Female	C- section	Private hospital	No	No	Yes	4	4	3	4	5	5	5	5	3	5	0	1	0	3	3	3	3	3	3	1	1	0	1	0	0	0	0	0	0	0	0	3	3	3
35-44	Urban	High School	Not Employed	Employed	Equal number of male and female babies	More than 6 years	26,000 – 50,000	With Spouse’s extended family	Less than 9 months	Female	C- section	Private hospital	No	No	Yes	7	7	6	5	5	5	5	4	5	4	2	1	1	2	2	1	1	2	2	1	1	1	0	0	0	0	0	0	0	0	0	0	2	2
26-34	Urban	High School	Not Employed	Not Employed	More female babies	2 to 6 years	50,000 – 1 lac PKR	Own house	9 months	Female	C- section	Private hospital	No	No	Yes	5	5	5	5	5	5	5	5	5	5	1	1	1	1	2	3	2	1	0	0	1	0	0	1	0	0	0	0	0	0	0	1	1	1
35-44	Urban	High School	Not Employed	Employed	More female babies	2 to 6 years	26,000 – 50,000	With Spouse’s extended family	9 months	male	C- section	Private hospital	No	No	Yes	5	5	5	5	4	5	6	4	4	5	1	0	1	1	2	2	3	2	2	0	1	0	0	1	0	0	0	0	0	0	0	3	3	3
26-34	Urban	No Formal education	Not Employed	Employed	Equal number of male and female babies	More than 6 years	26,000 – 50,000	With Spouse’s extended family	Less than 9 months	male	C- section	Government hospital	No	No	Yes	1	4	6	6	6	6	6	6	6	4	1	2	2	2	1	1	1	2	1	1	1	0	0	1	0	0	0	0	0	0	0	3	0	0
35-44	Rural	Primary	Not Employed	Employed	More female babies	More than 6 years	26,000 – 50,000	With Spouse’s extended family	9 months	Female	Simple Vaginal delivery (Normal)	Private hospital	No	Yes	Yes	4	5	5	5	5	5	5	5	5	5	1	2	1	1	3	2	1	3	3	1	1	1	0	0	0	0	0	0	0	0	1	3	0	2
16-25	Urban	No Formal education	Not Employed	Employed	More female babies	More than 6 years	26,000 – 50,000	With Spouse’s extended family	9 months	Female	C- section	Private hospital	No	No	Yes	5	5	5	5	5	5	5	5	5	5	3	3	1	1	3	0	2	1	2	1	1	0	0	0	1	0	0	0	0	0	0	2	2	2
26-34	Urban	Masters or higher	Not Employed	Employed	More female babies	More than 6 years	25,000 PKR or less	With Spouse’s extended family	9 months	Female	C- section	Government hospital	No	No	Yes	3	6	6	6	6	5	5	5	5	5	0	1	1	2	2	2	3	3	3	3	1	1	0	0	0	0	0	0	0	0	0	3	0	3
35-44	Urban	No Formal education	Not Employed	Not Employed	More female babies	More than 6 years	25,000 PKR or less	With Spouse’s extended family	Less than 9 months	Female	C- section	Government hospital	No	No	Yes	3	2	3	3	3	3	5	3	3	3	2	1	1	2	2	2	1	1	3	3	1	0	0	0	0	0	0	0	0	0	0	3	3	0
35-44	Urban	Primary	Not Employed	Employed	More male babies	More than 6 years	25,000 PKR or less	Own house	9 months	Female	C- section	Private hospital	No	No	Yes	2	2	5	3	3	3	5	5	4	4	1	2	2	3	3	2	2	2	2	2	1	1	0	0	0	0	0	0	0	0	0	0	0	0
16-25	Urban	Primary	Not Employed	Employed	Equal number of male and female babies	2 to 6 years	25,000 PKR or less	Own house	9 months	Female	C- section	Government hospital	No	Yes	Yes	5	5	5	5	4	5	6	5	5	5	2	1	1	1	2	1	2	1	2	3	1	1	0	0	0	0	0	0	0	0	1	2	0	0
26-34	Urban	High School	Not Employed	Not Employed	More male babies	2 to 6 years	25,000 PKR or less	Own house	9 months	male	C- section	Private hospital	No	No	Yes	4	3	3	3	5	5	5	5	5	5	1	2	2	1	2	2	2	1	3	2	1	1	0	0	0	0	0	0	0	0	0	0	0	3
16-25	Rural	High School	Not Employed	Not Employed	Equal number of male and female babies	2 to 6 years	25,000 PKR or less	With Spouse’s extended family	9 months	Female	C- section	Government hospital	No	No	Yes	2	3	4	4	4	4	5	3	3	3	2	2	1	1	2	1	2	2	1	2	1	0	0	0	0	0	0	0	0	0	0	3	0	0
35-44	Urban	No Formal education	Not Employed	Employed	More male babies	More than 6 years	26,000 – 50,000	With Spouse’s extended family	9 months	Female	Simple Vaginal delivery (Normal)	Government hospital	No	No	Yes	5	5	5	5	5	5	5	3	5	3	2	1	3	1	1	1	2	3	2	3	1	1	0	0	0	0	0	0	0	0	1	0	0	0
26-34	Urban	Primary	Not Employed	Employed	More female babies	More than 6 years	26,000 – 50,000	Own house	Less than 9 months	male	C- section	Government hospital	No	Yes	Yes	5	5	5	5	5	5	5	5	5	5	1	1	1	2	3	2	1	2	3	0	1	1	0	0	0	0	0	0	0	0	0	3	2	2
16-25	Urban	Bachelors	Not Employed	Not Employed	Equal number of male and female babies	More than 6 years	25,000 PKR or less	With Spouse’s extended family	9 months	Female	C- section	Government hospital	No	No	Yes	2	5	5	3	4	5	5	3	3	3	2	1	1	2	2	2	3	2	1	0	1	1	0	0	0	0	0	0	0	0	0	1	1	2
26-34	Urban	Bachelors	Not Employed	Employed	More male babies	More than 6 years	26,000 – 50,000	With Spouse’s extended family	9 months	male	C- section	Private hospital	No	No	Yes	5	5	6	6	5	5	6	5	5	5	1	0	0	3	2	3	2	1	3	3	1	0	0	0	0	0	0	0	0	0	1	0	0	0
16-25	Urban	Middle	Employed	Not Employed	More male babies	More than 6 years	25,000 PKR or less	With Spouse’s extended family	9 months	male	C- section	Government hospital	No	No	Yes	1	3	5	3	5	5	5	4	5	4	1	2	0	0	3	2	3	3	2	2	1	0	0	0	1	0	0	0	0	0	0	3	3	3
35-44	Urban	High School	Not Employed	Not Employed	More female babies	2 to 6 years	25,000 PKR or less	With Spouse’s extended family	9 months	Female	C- section	Government hospital	No	No	Yes	4	5	5	5	5	5	4	5	5	5	1	1	1	2	3	2	1	3	0	0	1	1	0	0	0	0	0	0	0	0	0	2	1	2
26-34	Urban	No Formal education	Not Employed	Employed	Equal number of male and female babies	More than 6 years	26,000 – 50,000	Own house	9 months	male	C- section	Government hospital	No	Yes	Yes	5	5	5	5	5	5	5	5	6	5	2	2	2	1	1	3	3	2	1	3	1	0	0	0	0	0	0	0	0	0	0	0	0	3
16-25	Urban	Primary	Not Employed	Employed	More female babies	2 to 6 years	26,000 – 50,000	Own house	9 months	Female	Simple Vaginal delivery (Normal)	Private hospital	No	No	Yes	4	4	4	4	4	4	5	4	4	4	2	1	2	2	2	1	1	2	2	1	1	0	0	1	0	0	0	0	0	0	0	3	3	3
35-44	Urban	High School	Not Employed	Not Employed	Equal number of male and female babies	More than 6 years	26,000 – 50,000	With Spouse’s extended family	9 months	male	C- section	Government hospital	No	No	Yes	5	6	6	6	6	6	6	5	6	5	1	2	2	3	2	3	3	2	3	3	1	1	0	0	0	0	0	0	0	0	0	1	1	3
35-44	Urban	Bachelors	Not Employed	Employed	More male babies	2 to 6 years	26,000 – 50,000	With Spouse’s extended family	Less than 9 months	male	C- section	Government hospital	No	No	Yes	3	5	6	5	4	4	5	5	5	5	2	0	2	2	2	1	0	3	3	1	1	0	0	0	0	0	0	0	0	0	1	0	0	0
16-25	Urban	No Formal education	Not Employed	Not Employed	More female babies	2 to 6 years	25,000 PKR or less	With Spouse’s extended family	9 months	Female	C- section	Government hospital	Yes	No	Yes	2	5	6	4	5	3	6	3	3	4	2	1	3	2	2	1	1	2	2	0	1	1	0	0	0	0	0	0	0	0	1	1	1	1
26-34	Urban	Bachelors	Employed	Employed	Equal number of male and female babies	2 to 6 years	26,000 – 50,000	Own house	9 months	Female	C- section	Government hospital	No	No	Yes	5	5	5	5	5	5	5	5	5	5	3	2	3	3	2	3	3	3	3	3	1	0	0	0	0	0	0	0	0	0	0	2	2	2
26-34	Urban	Bachelors	Not Employed	Employed	More female babies	More than 6 years	26,000 – 50,000	Own house	9 months	Female	C- section	Government hospital	No	No	Yes	5	5	5	5	6	6	5	6	5	5	1	2	3	2	2	0	3	1	1	0	1	1	0	0	0	0	0	0	0	0	0	2	2	2
26-34	Rural	Middle	Not Employed	Not Employed	More female babies	More than 6 years	25,000 PKR or less	With Spouse’s extended family	9 months	Female	C- section	Government hospital	No	No	Yes	5	5	5	5	5	5	5	5	5	5	2	1	3	1	3	3	2	1	3	3	1	0	0	0	0	0	0	0	0	0	0	0	0	0
26-34	Rural	Primary	Not Employed	Employed	Equal number of male and female babies	2 to 6 years	25,000 PKR or less	With Spouse’s extended family	9 months	male	C- section	Government hospital	No	No	Yes	5	5	5	5	4	5	5	5	5	5	1	1	3	0	2	2	1	3	1	2	1	0	0	0	0	0	0	0	0	0	0	3	3	3
16-25	Rural	High School	Not Employed	Employed	Equal number of male and female babies	2 to 6 years	25,000 PKR or less	With Spouse’s extended family	9 months	Female	C- section	Government hospital	No	No	Yes	5	5	5	5	5	5	5	5	5	5	2	3	2	2	1	2	1	1	2	2	1	1	0	0	0	0	0	0	0	0	0	3	3	2
35-44	Rural	Primary	Not Employed	Employed	More male babies	More than 6 years	25,000 PKR or less	Own house	9 months	male	C- section	Government hospital	No	No	Yes	4	4	5	5	4	4	5	5	5	5	2	1	2	1	2	2	1	2	3	3	1	1	0	0	0	0	0	0	0	0	0	3	3	3
35-44	Urban	High School	Not Employed	Not Employed	Equal number of male and female babies	2 to 6 years	25,000 PKR or less	With Spouse’s extended family	9 months	Female	Simple Vaginal delivery (Normal)	Government hospital	No	No	Yes	4	4	6	6	5	5	5	5	5	4	2	0	0	2	3	3	3	2	2	1	1	0	0	0	0	0	0	0	0	0	0	1	2	2
26-34	Urban	Middle	Not Employed	Not Employed	More female babies	2 to 6 years	25,000 PKR or less	Own house	9 months	male	C- section	Government hospital	No	No	Yes	4	5	5	5	4	4	5	3	3	3	1	2	0	2	2	1	2	3	3	3	1	1	0	0	0	0	0	0	0	0	0	2	0	0
35-44	Urban	Primary	Not Employed	Not Employed	More female babies	More than 6 years	26,000 – 50,000	Own house	9 months	male	Simple Vaginal delivery (Normal)	Government hospital	No	No	Yes	2	5	3	4	4	3	5	4	4	4	2	1	0	2	2	2	3	2	2	2	1	0	0	0	0	0	0	0	0	0	0	1	1	1
26-34	Urban	High School	Not Employed	Not Employed	More male babies	2 to 6 years	25,000 PKR or less	With Spouse’s extended family	9 months	Female	C- section	Government hospital	No	No	Yes	5	5	3	5	5	5	5	5	5	5	2	1	0	2	3	2	3	2	2	1	1	1	0	0	0	0	0	0	0	0	0	0	0	0
26-34	Urban	High School	Not Employed	Employed	More male babies	2 to 6 years	26,000 – 50,000	With Spouse’s extended family	9 months	male	C- section	Government hospital	Yes	No	Yes	4	5	4	4	5	5	5	5	5	5	3	1	2	2	2	2	1	1	3	1	1	1	0	1	0	0	0	0	0	0	0	1	1	1
16-25	Urban	Bachelors	Not Employed	Employed	More female babies	More than 6 years	26,000 – 50,000	Own house	9 months	male	C- section	Government hospital	No	No	Yes	5	5	5	5	5	5	6	5	5	5	2	1	2	1	2	2	2	1	2	2	1	1	0	0	0	0	0	0	0	0	0	1	1	1
16-25	Urban	High School	Not Employed	Employed	More male babies	More than 6 years	25,000 PKR or less	With Spouse’s extended family	9 months	Female	C- section	Government hospital	No	No	Yes	4	3	3	3	3	3	3	3	5	4	1	1	2	1	1	3	3	3	3	0	1	1	0	0	0	0	0	0	0	0	0	0	0	1
26-34	Urban	Middle	Not Employed	Employed	More female babies	2 to 6 years	26,000 – 50,000	Own house	Less than 9 months	male	C- section	Government hospital	No	Yes	Yes	3	5	5	5	5	5	5	5	5	5	1	2	2	2	1	2	2	2	2	3	1	1	0	0	0	0	0	0	0	0	0	1	1	1
35-44	Urban	High School	Not Employed	Employed	Equal number of male and female babies	More than 6 years	26,000 – 50,000	With Spouse’s extended family	9 months	Female	C- section	Government hospital	No	No	Yes	5	5	5	5	5	5	5	5	5	5	1	2	3	2	3	2	3	2	3	1	1	0	0	0	0	0	0	0	0	0	0	2	1	1
35-44	Urban	High School	Not Employed	Employed	Equal number of male and female babies	More than 6 years	50,000 – 1 lac PKR	Own house	9 months	male	C- section	Government hospital	No	No	Yes	5	5	5	5	5	5	5	5	3	4	2	2	2	3	3	2	3	2	1	2	1	0	0	1	0	0	0	0	0	0	0	2	1	2
26-34	Urban	High School	Not Employed	Employed	Equal number of male and female babies	More than 6 years	More than 1 lac PKR	With Spouse’s extended family	Less than 9 months	Female	C- section	Private hospital	Yes	No	Yes	5	5	7	3	2	4	6	4	5	5	2	1	2	2	2	1	2	1	3	3	1	0	0	0	1	0	0	0	0	0	0	2	1	3
26-34	Urban	High School	Not Employed	Employed	More female babies	2 to 6 years	50,000 – 1 lac PKR	With Spouse’s extended family	9 months	Female	C- section	Private hospital	No	Yes	Yes	5	6	6	6	5	5	5	5	6	5	1	1	3	2	2	2	3	2	2	2	1	1	0	0	0	0	0	0	0	0	0	2	0	2
35-44	Urban	Middle	Not Employed	Employed	Equal number of male and female babies	More than 6 years	26,000 – 50,000	With Spouse’s extended family	9 months	Female	C- section	Private hospital	No	No	Yes	5	6	6	6	6	6	6	6	5	5	1	1	3	2	3	2	1	0	2	1	1	1	0	1	0	0	0	0	0	0	0	0	0	0
35-44	Urban	No Formal education	Not Employed	Employed	More male babies	More than 6 years	26,000 – 50,000	With Spouse’s extended family	Less than 9 months	male	C- section	Private hospital	No	Yes	Yes	3	5	5	5	5	3	5	5	6	5	1	1	1	3	2	2	2	2	2	1	1	1	0	0	0	0	0	0	0	0	0	2	0	0
26-34	Urban	High School	Not Employed	Not Employed	More female babies	More than 6 years	26,000 – 50,000	With Spouse’s extended family	9 months	Female	C- section	Private hospital	No	No	Yes	5	5	5	3	5	5	3	3	5	5	2	2	2	2	2	2	1	3	2	2	1	0	1	0	0	0	0	0	0	0	0	2	1	0
26-34	Urban	Middle	Not Employed	Employed	More female babies	More than 6 years	26,000 – 50,000	Own house	9 months	Female	C- section	Private hospital	No	Yes	Yes	5	5	4	4	5	5	6	5	5	5	2	1	1	1	2	1	2	2	1	2	1	1	0	0	0	0	0	0	0	0	0	0	1	1
16-25	Urban	High School	Employed	Employed	More female babies	More than 6 years	50,000 – 1 lac PKR	Own house	9 months	Female	C- section	Private hospital	No	No	Yes	5	5	5	5	5	5	5	5	5	5	3	1	2	2	1	2	2	3	2	2	1	0	0	1	0	0	0	0	0	0	0	1	0	2
26-34	Urban	Middle	Not Employed	Employed	More female babies	More than 6 years	26,000 – 50,000	With Spouse’s extended family	9 months	Female	C- section	Private hospital	Yes	No	Yes	5	5	5	6	5	5	5	6	5	5	2	1	3	3	2	2	2	3	3	3	1	1	0	0	0	0	0	0	0	0	0	2	1	0
35-44	Rural	High School	Not Employed	Not Employed	More female babies	2 to 6 years	26,000 – 50,000	With Spouse’s extended family	9 months	Female	C- section	Private hospital	No	No	Yes	5	5	5	5	5	5	5	5	5	5	2	2	3	2	2	1	2	1	3	2	1	1	0	1	0	0	0	0	0	0	0	1	2	2
26-34	Urban	High School	Not Employed	Not Employed	More female babies	More than 6 years	25,000 PKR or less	Own house	9 months	Female	C- section	Private hospital	No	Yes	Yes	5	5	5	5	5	5	5	5	5	4	2	1	3	2	2	2	1	3	3	2	1	1	0	0	0	0	0	0	0	0	0	1	1	0
16-25	Urban	High School	Not Employed	Employed	More female babies	2 to 6 years	25,000 PKR or less	Own house	9 months	Female	C- section	Private hospital	No	No	Yes	3	3	5	5	5	5	5	5	4	5	2	2	2	2	2	2	2	2	2	1	1	0	0	0	1	0	0	0	0	0	0	2	1	3
26-34	Urban	Masters or higher	Not Employed	Employed	Equal number of male and female babies	More than 6 years	25,000 PKR or less	Own house	9 months	Female	C- section	Private hospital	No	No	Yes	5	5	5	5	6	5	5	6	4	6	2	1	3	2	2	2	2	3	2	2	1	1	0	0	0	0	0	0	0	0	1	0	0	0
26-34	Urban	High School	Not Employed	Not Employed	More female babies	2 to 6 years	26,000 – 50,000	With Spouse’s extended family	9 months	Female	C- section	Private hospital	Yes	No	Yes	6	6	5	6	5	5	4	5	5	5	2	1	2	2	2	1	2	3	3	2	1	0	0	0	1	0	0	0	0	0	0	0	0	0
26-34	Urban	High School	Not Employed	Not Employed	More female babies	More than 6 years	25,000 PKR or less	With Spouse’s extended family	Less than 9 months	male	C- section	Private hospital	No	Yes	Yes	5	5	5	3	3	3	7	5	3	3	1	1	3	3	3	3	3	3	3	3	1	1	0	0	1	0	0	0	0	0	0	0	0	0
26-34	Urban	Bachelors	Employed	Employed	More female babies	More than 6 years	26,000 – 50,000	Own house	9 months	Female	C- section	Private hospital	No	Yes	Yes	3	5	5	5	5	5	5	2	5	2	2	1	2	2	2	1	3	2	2	3	1	1	0	0	0	0	0	1	0	0	0	1	2	1
26-34	Urban	Primary	Not Employed	Employed	Equal number of male and female babies	2 to 6 years	26,000 – 50,000	With Spouse’s extended family	9 months	Female	C- section	Private hospital	No	Yes	Yes	5	5	5	3	3	3	7	3	7	3	2	2	2	2	2	2	1	2	1	3	1	1	0	0	0	0	0	0	0	0	0	2	2	2
26-34	Rural	High School	Not Employed	Employed	Equal number of male and female babies	2 to 6 years	25,000 PKR or less	With Spouse’s extended family	9 months	male	C- section	Private hospital	No	No	Yes	5	3	3	3	4	3	5	4	5	4	2	1	3	3	3	3	3	2	2	3	1	0	0	1	0	0	0	0	0	0	0	2	2	3
16-25	Urban	High School	Not Employed	Not Employed	More female babies	2 to 6 years	25,000 PKR or less	With Spouse’s extended family	9 months	Female	C- section	Government hospital	No	No	Yes	3	3	3	3	5	3	5	4	5	4	2	2	2	2	2	2	2	2	2	1	1	1	0	0	0	0	0	0	0	0	0	2	0	0
26-34	Urban	High School	Not Employed	Not Employed	More female babies	2 to 6 years	26,000 – 50,000	With Spouse’s extended family	9 months	male	C- section	Government hospital	No	No	Yes	5	5	5	5	5	5	5	5	5	5	2	1	2	1	2	1	3	2	3	2	1	1	0	0	0	0	0	0	0	0	0	2	0	0
26-34	Urban	Bachelors	Not Employed	Employed	More male babies	More than 6 years	26,000 – 50,000	Own house	9 months	Female	C- section	Private hospital	No	No	Yes	2	5	5	5	6	6	6	6	6	6	2	1	2	1	1	2	2	1	2	2	1	1	0	0	0	0	0	0	0	0	0	1	2	0
16-25	Urban	Primary	Not Employed	Employed	Equal number of male and female babies	More than 6 years	25,000 PKR or less	With Spouse’s extended family	Less than 9 months	Female	C- section	Government hospital	No	Yes	Yes	6	6	6	5	5	5	5	4	5	4	1	2	1	2	2	2	2	2	3	2	1	1	0	0	0	0	0	0	0	0	0	0	0	0
26-34	Urban	High School	Not Employed	Not Employed	More female babies	2 to 6 years	26,000 – 50,000	Own house	9 months	Female	C- section	Private hospital	Yes	No	Yes	5	5	3	3	5	6	5	5	5	5	2	2	2	3	1	3	3	3	2		1	1	0	0	0	0	0	0	0	0	0	3	0	0
26-34	Urban	High School	Not Employed	Not Employed	More female babies	More than 6 years	26,000 – 50,000	With Spouse’s extended family	9 months	Female	C- section	Private hospital	No	Yes	Yes	5	6	6	3	5	5	5	5	5	5	3	2	2	2	2	1	3	2	2	2	1	1	0	0	0	0	0	0	0	0	0	0	0	0
16-25	Urban	Middle	Not Employed	Employed	More female babies	2 to 6 years	25,000 PKR or less	Own house	9 months	male	C- section	Private hospital	Yes	No	Yes	5	5	7	5	5	3	5	4	5	4	2	1	2	2	2	1	2	2	2	2	1	0	0	0	1	0	0	0	0	0	0	2	1	1
16-25	Urban	High School	Not Employed	Not Employed	Equal number of male and female babies	2 to 6 years	25,000 PKR or less	With Spouse’s extended family	9 months	male	Simple Vaginal delivery (Normal)	Private hospital	No	No	Yes	2	2	2	5	5	5	5	5	5	5	2	1	1	2	2	2	2	3	3	2	1	0	0	1	0	0	0	0	0	0	0	2	2	0
26-34	Urban	Primary	Not Employed	Employed	Equal number of male and female babies	More than 6 years	25,000 PKR or less	With Spouse’s extended family	9 months	male	C- section	Private hospital	No	No	Yes	4	5	5	5	5	5	5	5	6	5	1	2	2	2	3	3	2	2	2	2	1	0	0	0	0	0	0	0	0	0	0	1	1	2
16-25	Rural	High School	Not Employed	Not Employed	More female babies	2 to 6 years	26,000 – 50,000	With Spouse’s extended family	9 months	Female	C- section	Private hospital	Yes	No	Yes	3	3	3	6	4	4	4	4	4	4	2	1	3	1	2	2	2	2	2	3	1	0	0	0	0	0	0	0	0	0	0	2	3	3
26-34	Rural	No Formal education	Not Employed	Not Employed	More female babies	2 to 6 years	25,000 PKR or less	With Spouse’s extended family	9 months	Female	C- section	Government hospital	No	Yes	Yes	4	4	6	5	4	4	5	5	5	5	1	1	1	2	2	3	3	2	2	1	1	0	0	0	1	0	0	0	0	0	0	2	2	1
26-34	Urban	Primary	Not Employed	Employed	Equal number of male and female babies	More than 6 years	25,000 PKR or less	With Spouse’s extended family	9 months	Female	Simple Vaginal delivery (Normal)	Private hospital	No	No	Yes	6	6	6	6	3	4	6	5	5	5	2	1	2	2	2	2	2	2	3	0	1	1	0	0	0	0	0	0	0	0	0	1	2	2
16-25	Rural	High School	Not Employed	Employed	More female babies	More than 6 years	26,000 – 50,000	With Spouse’s extended family	9 months	male	C- section	Private hospital	No	No	Yes	5	3	5	6	6	6	6	6	6	6	1	2	1	2	1	2	1	3	2	3	1	1	0	0	0	0	0	0	0	0	0	2	3	2
35-44	Urban	Middle	Not Employed	Employed	More male babies	More than 6 years	26,000 – 50,000	Own house	9 months	male	C- section	Private hospital	No	No	Yes	4	6	5	5	5	5	4	5	5	5	1	2	2	1	2	2	3	2	2	3	1	1	0	0	0	0	0	0	0	0	1	2	2	3
35-44	Rural	Primary	Not Employed	Employed	Equal number of male and female babies	More than 6 years	25,000 PKR or less	With Spouse’s extended family	Less than 9 months	male	C- section	Private hospital	No	Yes	Yes	3	1	5	5	5	5	6	6	5	5	1	1	2	2	2	2	3	1	2	2	1	1	0	0	0	0	0	0	0	0	0	2	1	2
26-34	Urban	High School	Not Employed	Not Employed	More male babies	2 to 6 years	26,000 – 50,000	Own house	9 months	male	C- section	Private hospital	Yes	No	Yes	4	2	5	5	3	4	3	5	3	6	2	1	3	2	2	3	2	3	2	2	1	0	0	0	0	0	0	0	0	0	0	0	0	2
26-34	Urban	High School	Not Employed	Employed	More female babies	More than 6 years	25,000 PKR or less	With Spouse’s extended family	9 months	male	Simple Vaginal delivery (Normal)	Government hospital	No	No	Yes	7	6	6	6	5	6	6	5	5	5	0	0	2	1	3	3	2	2	2	2	1	1	0	0	0	0	0	0	0	0	0	2	2	2
16-25	Rural	Bachelors	Employed	Not Employed	More female babies	More than 6 years	26,000 – 50,000	With Spouse’s extended family	9 months	male	C- section	Government hospital	No	No	Yes	4	5	5	5	5	3	3	3	5	5	2	1	2	2	3	3	3	0	3	3	1	1	0	0	0	0	0	0	0	0	0	1	2	0
26-34	Urban	Bachelors	Not Employed	Employed	More female babies	More than 6 years	26,000 – 50,000	With Spouse’s extended family	9 months	Female	C- section	Government hospital	No	Yes	Yes	5	5	5	5	5	5	5	5	5	5	1	2	2	1	3	2	1	3	2	2	1	1	0	0	0	0	0	0	0	0	0	2	1	0
16-25	Urban	Middle	Employed	Not Employed	Equal number of male and female babies	2 to 6 years	25,000 PKR or less	With Spouse’s extended family	9 months	male	Simple Vaginal delivery (Normal)	Government hospital	No	No	Yes	3	5	5	5	5	5	5	5	5	5	1	2	2	1	2	2	3	3	3	3	1	0	0	1	0	0	0	0	0	0	0	0	0	3
35-44	Urban	Bachelors	Employed	Employed	More male babies	More than 6 years	25,000 PKR or less	With Spouse’s extended family	9 months	Female	C- section	Private hospital	Yes	No	Yes	3	6	5	6	4	4	5	6	5	5	0	1	2	2	2	2	3	2	2	0	1	1	1	0	0	0	0	0	0	0	0	1	0	0
26-34	Urban	High School	Not Employed	Employed	More female babies	2 to 6 years	26,000 – 50,000	Own house	9 months	Female	C- section	Government hospital	No	Yes	Yes	5	5	5	5	5	5	5	5	5	5	1	2	3	1	2	2	1	3	2	0	1	1	0	0	0	0	0	0	0	0	0	3	2	2
26-34	Urban	Primary	Not Employed	Not Employed	Equal number of male and female babies	More than 6 years	25,000 PKR or less	With Spouse’s extended family	9 months	Female	Simple Vaginal delivery (Normal)	Government hospital	No	No	Yes	2	3	3	5	4	3	5	3	3	4	2	1	2	1	2	3	2	3	2	3	1	0	0	0	0	0	0	0	0	0	0	2	0	2
26-34	Urban	High School	Not Employed	Not Employed	More male babies	More than 6 years	25,000 PKR or less	Own house	9 months	male	C- section	Government hospital	No	No	Yes	5	5	5	5	5	5	5	5	5	5	2	1	3	2	3	2	3	2	2	3	1	1	0	1	1	0	0	0	0	0	0	0	0	3
26-34	Urban	No Formal education	Not Employed	Employed	More female babies	2 to 6 years	26,000 – 50,000	Own house	9 months	male	C- section	Government hospital	No	No	Yes	5	5	5	5	3	4	5	4	4	5	1	2	3	2	2	3	3	2	3	2	1	0	0	1	1	0	0	0	0	0	0	2	2	1
35-44	Urban	High School	Not Employed	Not Employed	More female babies	More than 6 years	26,000 – 50,000	With Spouse’s extended family	9 months	Female	C- section	Government hospital	No	No	Yes	5	4	6	4	5	4	4	4	5	4	2	1	2	1	2	1	3	3	3	0	1	1	0	0	0	0	0	0	0	0	0	3	3	3
16-25	Urban	High School	Not Employed	Employed	More female babies	2 to 6 years	26,000 – 50,000	With Spouse’s extended family	9 months	Female	C- section	Government hospital	No	No	Yes	5	5	5	5	5	5	5	5	5	5	1	1	1	2	2	2	3	3	3	2	1	1	0	0	0	0	0	0	0	0	0	2	2	3
26-34	Urban	Bachelors	Not Employed	Employed	More male babies	2 to 6 years	26,000 – 50,000	Own house	Less than 9 months	male	C- section	Home	Yes	No	Yes	5	6	6	6	6	6	6	5	6	6	2	1	2	3	2	2	3	3	3	3	1	0	0	0	0	0	0	0	0	0	0	2	1	3
26-34	Urban	Middle	Not Employed	Not Employed	More female babies	2 to 6 years	26,000 – 50,000	With Spouse’s extended family	Less than 9 months	male	C- section	Government hospital	No	No	Yes	6	6	6	5	4	4	6	6	5	5	2	1	2	1	2	3	2	3	1	0	1	0	0	0	0	0	0	0	0	0	0	3	3	3
16-25	Urban	High School	Not Employed	Employed	More female babies	2 to 6 years	25,000 PKR or less	With Spouse’s extended family	9 months	Female	C- section	Government hospital	Yes	No	Yes	5	5	5	5	5	5	5	5	6	4	1	2	3	0	3	3	3	3	3	1	1	0	0	0	0	0	0	0	0	0	0	2	2	2
26-34	Urban	Middle	Not Employed	Employed	Equal number of male and female babies	2 to 6 years	26,000 – 50,000	With Spouse’s extended family	9 months	Female	C- section	Government hospital	No	No	Yes	1	5	4	5	4	5	1	4	5	5	2	2	2	1	3	2	3	2	3	3	1	1	0	0	0	0	0	0	0	0	0	0	1	0
16-25	Rural	High School	Not Employed	Employed	More male babies	Less than one year	25,000 PKR or less	With Spouse’s extended family	Less than 9 months	male	C- section	Government hospital	Yes	No	Yes	5	6	5	6	5	5	6	5	5	5	0	0	3	3	1	1	1	3	3	1	1	1	0	0	0	0	0	0	0	0	0	1	1	3
35-44	Urban	High School	Not Employed	Not Employed	More female babies	2 to 6 years	26,000 – 50,000	With Spouse’s extended family	9 months	male	C- section	Government hospital	No	No	Yes	5	5	6	5	3	4	7	5	6	5	2	1	1	0	2	2	2	3	0	3	1	0	0	0	0	0	0	0	0	0	0	1	2	1
16-25	Urban	High School	Not Employed	Not Employed	More female babies	2 to 6 years	25,000 PKR or less	Own house	9 months	Female	Simple Vaginal delivery (Normal)	Government hospital	No	Yes	Yes	5	5	6	5	5	5	5	5	5	5	1	2	2	2	2	2	2	1	1	0	1	0	0	0	1	0	0	0	0	0	0	1	2	2
35-44	Rural	Bachelors	Employed	Employed	More male babies	2 to 6 years	26,000 – 50,000	Own house	9 months	male	C- section	Government hospital	No	No	Yes	5	6	6	6	6	6	6	6	6	6	1	2	1	1	2	1	1	2	3	1	1	1	0	0	0	0	0	0	0	0	0	1	1	1
26-34	Urban	Primary	Not Employed	Employed	More female babies	More than 6 years	25,000 PKR or less	Own house	9 months	Female	C- section	Government hospital	No	No	Yes	5	5	5	5	5	5	5	5	5	5	1	2	2	3	2	2	3	3	1	0	1	0	0	0	0	0	0	0	0	0	0	1	1	3
16-25	Urban	No Formal education	Not Employed	Employed	More male babies	2 to 6 years	25,000 PKR or less	With Spouse’s extended family	9 months	male	C- section	Government hospital	Yes	No	Yes	5	3	5	5	5	5	5	5	3	3	2	1	2	1	2	1	2	2	3	1	1	1	0	0	0	0	0	0	0	0	0	1	1	1
16-25	Urban	High School	Not Employed	Employed	More female babies	2 to 6 years	25,000 PKR or less	With Spouse’s extended family	9 months	male	C- section	Government hospital	No	No	Yes	5	4	4	5	5	4	4	5	5	5	1	2	2	1	3	1	2	3	3	0	1	0	0	0	1	0	0	0	0	0	0	2	1	1
16-25	Urban	High School	Not Employed	Not Employed	More female babies	2 to 6 years	25,000 PKR or less	With Spouse’s extended family	9 months	male	C- section	Government hospital	No	Yes	Yes	3	5	5	5	1	1	5	3	4	3	2	1	3	1	2	3	2	0	3	0	1	1	0	0	0	0	0	0	0	0	0	2	2	2
16-25	Rural	No Formal education	Not Employed	Not Employed	Equal number of male and female babies	2 to 6 years	25,000 PKR or less	With Spouse’s extended family	9 months	Female	C- section	Private hospital	Yes	No	Yes	4	5	5	5	5	5	5	5	5	5	2	1	2	2	3	3	3	2	3	2	1	1	0	0	0	0	0	0	0	0	0	2	1	2
16-25	Urban	High School	Not Employed	Not Employed	More female babies	More than 6 years	25,000 PKR or less	Own house	9 months	male	C- section	Government hospital	No	No	Yes	5	5	5	5	5	5	5	5	6	4	2	1	2	2	3	2	3	3	3	0	1	0	0	0	0	0	0	0	0	0	1	1	1	1
35-44	Urban	High School	Not Employed	Not Employed	Equal number of male and female babies	More than 6 years	25,000 PKR or less	With Spouse’s extended family	9 months	Female	C- section	Government hospital	No	No	Yes	3	3	5	5	3	4	3	3	3	4	1	2	1	2	2	3	3	3	3	1	1	0	0	0	1	0	0	0	0	0	0	2	1	1
26-34	Rural	High School	Not Employed	Not Employed	More female babies	2 to 6 years	25,000 PKR or less	Own house	Less than 9 months	male	C- section	Government hospital	No	No	Yes	4	5	5	5	4	3	5	5	5	5	0	0	2	1	2	2	3	2	3	2	1	1	0	0	0	0	0	0	0	0	0	2	1	2
35-44	Rural	Middle	Not Employed	Employed	More female babies	More than 6 years	25,000 PKR or less	With Spouse’s extended family	9 months	male	C- section	Government hospital	No	No	Yes	3	5	6	6	6	6	6	6	6	6	1	2	3	2	2	2	2	1	3	2	1	1	0	0	0	0	0	0	0	0	0	2	1	2
35-44	Urban	Primary	Not Employed	Employed	More female babies	2 to 6 years	26,000 – 50,000	Own house	9 months	Female	Simple Vaginal delivery (Normal)	Government hospital	Yes	No	Yes	6	5	6	6	6	2	6	6	5	5	1	1	1	1	2	3	3	1	3	0	1	0	0	0	0	0	0	0	0	0	1	1	1	3
26-34	Urban	High School	Not Employed	Not Employed	More female babies	Less than one year	26,000 – 50,000	Own house	Less than 9 months	Female	C- section	Government hospital	No	No	Yes	3	5	7	5	5	5	5	2	4	4	1	1	2	1	3	3	2	2	2	3	1	1	0	0	1	0	0	0	0	0	0	1	2	2
26-34	Urban	Bachelors	Employed	Employed	More male babies	2 to 6 years	25,000 PKR or less	Own house	9 months	male	C- section	Government hospital	No	No	Yes	6	6	6	6	6	6	6	6	6	6	3	0	2	2	3	2	1	3	2	3	1	1	1	0	0	0	0	0	0	0	1	0	0	0
26-34	Urban	No Formal education	Not Employed	Not Employed	More female babies	More than 6 years	26,000 – 50,000	With Spouse’s extended family	9 months	Female	C- section	Government hospital	No	Yes	Yes	4	6	7	6	7	6	7	5	7	7	2	1	2	1	1	1	1	1	1	1	1	0	0	0	0	0	0	0	1	0	1	0	2	1
16-25	Urban	Middle	Not Employed	Employed	More female babies	2 to 6 years	25,000 PKR or less	With Spouse’s extended family	9 months	male	C- section	Government hospital	No	No	Yes	5	6	6	6	6	6	6	3	3	3	1	0	2	2	3	2	2	1	1	1	1	1	0	0	0	0	0	0	0	0	1	2	1	1
26-34	Urban	No Formal education	Not Employed	Employed	More male babies	2 to 6 years	More than 1 lac PKR	Own house	9 months	Female	C- section	Government hospital	No	Yes	Yes	1	6	6	2	3	3	3	3	6	3	2	2	2	0	1	1	3	3	3	2	1	1	0	0	0	0	0	0	0	0	0	0	0	0
16-25	Urban	Primary	Not Employed	Not Employed	More female babies	More than 6 years	26,000 – 50,000	Own house	9 months	Female	C- section	Government hospital	Yes	No	Yes	3	2	3	3	5	6	6	6	6	4	1	2	0	1	2	1	3	3	2	3	1	0	0	0	0	0	0	0	1	0	1	2	2	2
35-44	Rural	High School	Not Employed	Employed	More female babies	2 to 6 years	26,000 – 50,000	Own house	9 months	Female	C- section	Government hospital	Yes	No	Yes	2	2	3	6	5	2	6	2	2	6	0	0	3	1	2	1	3	1	3	2	1	1	0	0	0	0	0	0	1	0	1	1	1	1
35-44	Urban	Primary	Not Employed	Not Employed	More male babies	2 to 6 years	25,000 PKR or less	Own house	9 months	male	C- section	Government hospital	No	No	Yes	2	6	6	3	6	1	5	3	6	7	2	0	1	0	2	3	2	3	2	1	1	0	0	0	0	0	1	0	0	0	0	2	2	3
26-34	Urban	Primary	Not Employed	Employed	More female babies	More than 6 years	25,000 PKR or less	Own house	9 months	Female	C- section	Government hospital	Yes	No	Yes	4	3	6	3	4	4	6	3	5	3	2	1	2	2	2	0	3	2	2	3	1	0	0	0	0	0	0	0	0	0	0	3	2	2
26-34	Urban	Primary	Not Employed	Employed	More female babies	2 to 6 years	25,000 PKR or less	With Spouse’s extended family	9 months	male	Simple Vaginal delivery (Normal)	Government hospital	No	No	Yes	6	3	3	3	3	5	3	5	3	5	2	1	3	2	2	2	0	2	3	1	1	0	0	0	1	0	0	0	0	0	0	2	1	3
26-34	Urban	Primary	Not Employed	Not Employed	More male babies	2 to 6 years	26,000 – 50,000	Own house	Less than 9 months	male	C- section	Government hospital	No	No	Yes	3	3	3	3	2	6	6	4	6	4	1	2	2	2	3	1	1	3	2	0	1	1	0	0	0	0	0	0	0	0	0	2	3	2
26-34	Urban	Primary	Not Employed	Employed	Equal number of male and female babies	More than 6 years	25,000 PKR or less	Own house	9 months	male	C- section	Government hospital	No	No	Yes	2	5	4	5	3	2	6	3	6	4	0	0	0	3	3	3	3	3	3	3	1	1	0	0	0	0	0	0	0	0	0	2	3	2
26-34	Urban	Primary	Not Employed	Not Employed	More female babies	More than 6 years	25,000 PKR or less	Own house	Less than 9 months	Female	C- section	Government hospital	No	No	Yes	2	5	2	7	2	3	6	3	2	2	3	3	3	3	3	3	3	3	3	3	1	0	0	0	1	0	0	0	0	0	0	2	3	2
35-44	Urban	No Formal education	Not Employed	Not Employed	Equal number of male and female babies	2 to 6 years	26,000 – 50,000	With Spouse’s extended family	Less than 9 months	Female	C- section	Government hospital	No	Yes	Yes	5	3	5	3	2	6	3	4	3	3	1	2	2	3	3	2	1	3	1	0	1	1	0	0	0	0	0	0	0	0	0	2	3	2
35-44	Urban	Primary	Not Employed	Employed	More female babies	2 to 6 years	26,000 – 50,000	With Spouse’s extended family	Less than 9 months	Female	C- section	Government hospital	No	No	Yes	2	5	6	3	6	1	1	3	3	2	1	2	3	0	2	1	3	0	3	3	1	0	0	0	0	0	0	0	1	0	0	3	2	1
26-34	Urban	Bachelors	Employed	Not Employed	More female babies	2 to 6 years	26,000 – 50,000	With Spouse’s extended family	9 months	Female	Simple Vaginal delivery (Normal)	Government hospital	No	Yes	Yes	5	2	3	1	3	2	2	3	2	2	2	1	2	2	3	2	3	2	2	3	1	1	0	0	0	0	0	0	0	0	0	3	1	2
26-34	Urban	Primary	Not Employed	Not Employed	More male babies	2 to 6 years	26,000 – 50,000	With Spouse’s extended family	9 months	Female	C- section	Government hospital	No	No	Yes	3	5	2	2	2	1	3	2	1	3	2	3	0	2	1	2	1	2	3	1	1	0	0	0	0	0	0	0	0	0	0	1	2	1
26-34	Urban	Primary	Employed	Not Employed	More female babies	More than 6 years	26,000 – 50,000	With Spouse’s extended family	Less than 9 months	Female	C- section	Private hospital	Yes	No	Yes	3	2	1	2	3	1	1	2	2	3	1	1	2	2	3	2	3	1	3	2	1	0	0	0	1	0	0	1	1	0	1	1	1	3
26-34	Rural	No Formal education	Not Employed	Not Employed	More female babies	More than 6 years	26,000 – 50,000	Own house	Less than 9 months	Female	C- section	Government hospital	Yes	No	Yes	3	3	5	3	2	1	3	2	1	3	2	1	2	2	1	3	3	2	2	3	1	1	1	0	0	0	0	0	0	0	1	3	2	3
26-34	Rural	High School	Not Employed	Employed	More female babies	2 to 6 years	26,000 – 50,000	Own house	9 months	Female	C- section	Government hospital	No	No	Yes	2	3	1	2	3	1	3	2	6	4	3	3	3	3	3	3	3	3	3	3	1	1	0	0	0	0	0	0	0	0	0	3	3	3
26-34	Urban	No Formal education	Not Employed	Employed	More female babies	More than 6 years	26,000 – 50,000	With Spouse’s extended family	9 months	Female	C- section	Government hospital	No	No	Yes	3	2	3	6	1	5	1	5	1	1	3	3	3	3	3	3	3	3	3	3	1	0	0	0	1	0	0	0	1	0	1	2	2	3
16-25	Urban	Bachelors	Not Employed	Employed	More female babies	2 to 6 years	50,000 – 1 lac PKR	Own house	9 months	male	C- section	Government hospital	Yes	No	Yes	3	3	3	2	1	3	4	3	3	3	3	3	3	3	3	3	3	3	3	3	1	0	0	1	0	0	0	0	0	0	0	1	3	2
26-34	Urban	Primary	Not Employed	Employed	More female babies	More than 6 years	26,000 – 50,000	With Spouse’s extended family	Less than 9 months	male	C- section	Government hospital	No	No	Yes	3	3	4	3	2	2	2	1	2	3	3	3	3	3	3	3	3	3	3	3	1	1	0	0	0	0	0	0	0	0	0	2	2	3
16-25	Rural	No Formal education	Not Employed	Employed	More female babies	More than 6 years	25,000 PKR or less	Own house	Less than 9 months	Female	C- section	Government hospital	Yes	Yes	Yes	6	7	6	6	1	1	6	1	6	1	3	3	3	3	3	3	3	3	3	3	1	0	0	0	0	0	0	0	0	0	1	3	3	3
16-25	Urban	Middle	Not Employed	Employed	More male babies	2 to 6 years	25,000 PKR or less	With Spouse’s extended family	9 months	male	C- section	Government hospital	No	No	Yes	3	4	3	2	2	3	3	3	1	2	3	3	3	3	0	3	3	3	3	3	1	0	0	0	1	0	0	0	0	0	1	3	3	2
26-34	Urban	Masters or higher	Not Employed	Employed	More female babies	2 to 6 years	50,000 – 1 lac PKR	With Spouse’s extended family	9 months	Female	C- section	Private hospital	No	No	Yes	5	5	6	5	4	4	4	5	5	4	3	3	3	3	2	3	3	3	3	3	1	0	0	0	0	0	0	0	0	0	0	3	3	3
35-44	Urban	Primary	Not Employed	Employed	More male babies	2 to 6 years	25,000 PKR or less	With Spouse’s extended family	9 months	Female	Simple Vaginal delivery (Normal)	Government hospital	No	No	Yes	4	5	5	3	3	3	3	2	3	3	3	3	2	1	3	2	3	3	3	1	1	0	0	0	0	0	0	0	0	0	0	2	3	2
26-34	Urban	No Formal education	Not Employed	Employed	More female babies	Less than one year	25,000 PKR or less	Own house	Less than 9 months	Female	C- section	Government hospital	No	No	Yes	5	5	2	2	1	2	3	2	3	2	3	3	3	3	3	2	1	0	3	2	1	0	1	0	0	0	0	0	0	0	0	3	2	3
35-44	Urban	Middle	Not Employed	Employed	More female babies	More than 6 years	50,000 – 1 lac PKR	With Spouse’s extended family	9 months	Female	C- section	Government hospital	No	Yes	Yes	4	3	1	7	6	7	2	2	3	7	0	0	1	1	3	3	3	3	3	3	1	0	0	0	0	0	0	0	0	0	0	3	2	3
35-44	Rural	Primary	Not Employed	Employed	More female babies	2 to 6 years	50,000 – 1 lac PKR	With Spouse’s extended family	9 months	male	C- section	Government hospital	No	Yes	Yes	3	2	1	3	2	3	2	2	3	2	3	0	0	1	3	0	3	1	3	2	1	0	0	0	0	0	0	0	0	0	1	1	2	2
35-44	Urban	High School	Not Employed	Not Employed	More female babies	More than 6 years	26,000 – 50,000	With Spouse’s extended family	Less than 9 months	Female	C- section	Government hospital	No	No	Yes	2	6	4	1	5	3	1	4	4	3	3	3	3	3	3	3	3	3	3	3	1	0	0	0	0	0	0	0	0	0	0	3	2	2
35-44	Rural	Bachelors	Not Employed	Employed	Equal number of male and female babies	2 to 6 years	26,000 – 50,000	With Spouse’s extended family	9 months	Female	C- section	Government hospital	No	Yes	Yes	2	3	2	1	4	1	3	2	3	2	3	3	3	3	0	3	3	3	3	3	1	0	0	0	1	0	0	0	0	0	0	2	3	3
35-44	Urban	Primary	Not Employed	Not Employed	More female babies	More than 6 years	25,000 PKR or less	With Spouse’s extended family	Less than 9 months	male	C- section	Government hospital	No	No	Yes	2	3	4	5	6	7	3	2	5	1	3	2	1	3	2	1	1	1	2	2	1	1	1	1	0	0	0	0	0	0	0	3	3	2
26-34	Urban	No Formal education	Not Employed	Employed	Equal number of male and female babies	More than 6 years	26,000 – 50,000	With Spouse’s extended family	9 months	Female	C- section	Government hospital	No	No	Yes	1	2	3	2	1	3	1	2	3	3	2	0	2	1	3	3	2	3	3	2	1	0	0	0	0	0	0	0	0	0	0	3	2	1
26-34	Urban	Bachelors	Employed	Employed	Equal number of male and female babies	More than 6 years	26,000 – 50,000	Own house	9 months	male	C- section	Government hospital	No	No	Yes	2	3	1	3	2	1	1	2	7	4	3	3	3	3	3	3	2	3	3	3	1	1	0	0	0	0	0	0	0	0	1	3	2	3
35-44	Urban	High School	Employed	Employed	More female babies	More than 6 years	26,000 – 50,000	Own house	9 months	Female	C- section	Government hospital	No	No	Yes	1	2	3	1	2	3	1	3	1	3	2	1	3	3	3	3	3	3	3	3	1	1	0	0	0	0	0	0	0	0	0	3	2	3
35-44	Urban	No Formal education	Not Employed	Not Employed	More male babies	More than 6 years	25,000 PKR or less	With Spouse’s extended family	9 months	Female	C- section	Government hospital	No	No	Yes	2	3	1	1	3	2	3	3	1	3	3	0	3	2	1	0	3	2	3	1	1	0	0	0	0	0	0	0	1	0	1	2	3	2
35-44	Urban	No Formal education	Not Employed	Not Employed	More female babies	More than 6 years	26,000 – 50,000	Own house	9 months	male	C- section	Government hospital	No	Yes	Yes	2	3	1	2	3	1	2	3	1	3	3	3	3	3	2	3	2	1	3	2	1	0	0	0	0	0		0	0	1	0	3	3	3
26-34	Urban	Middle	Not Employed	Not Employed	Equal number of male and female babies	More than 6 years	25,000 PKR or less	Own house	Less than 9 months	male	C- section	Government hospital	No	No	Yes	1	2	3	4	5	4	3	1	4	4	3	3	3	1	3	1	3	3	1	1	1	0	0	1	0	0	0	0	0	0	1	2	0	0
16-25	Urban	Primary	Not Employed	Not Employed	More female babies	2 to 6 years	26,000 – 50,000	Own house	9 months	male	C- section	Government hospital	No	No	Yes	3	2	1	5	4	4	3	2	2	2	3	1	2	3	3	3	3	1	1	3	1	0	0	0	0	0	0	0	0	0	1	3	2	2
35-44	Urban	Masters or higher	Employed	Employed	More male babies	More than 6 years	50,000 – 1 lac PKR	Own house	9 months	Female	Simple Vaginal delivery (Normal)	Private hospital	No	No	Yes	2	3	5	1	2	3	2	3	3	1	3	1	1	3	1	3	3	2	3	0	1	0	0	0	0	0	0	1	0	0	0	3	2	2
16-25	Urban	Primary	Not Employed	Employed	Equal number of male and female babies	2 to 6 years	26,000 – 50,000	With Spouse’s extended family	9 months	Female	C- section	Government hospital	No	No	Yes	1	2	1	3	1	2	3	1	2	3	3	1	0	1	3	0	3	1	0	1	1	1	0	0	0	0	0	0	0	0	0	3	2	3
35-44	Urban	Primary	Not Employed	Employed	Equal number of male and female babies	2 to 6 years	26,000 – 50,000	With Spouse’s extended family	9 months	Female	C- section	Government hospital	No	No	Yes	1	2	3	1	2	3	1	2	3	2	3	3	2	3	3	1	3	3	3	3	1	0	0	0	0	0	0	0	1	0	1	3	2	3
16-25	Urban	Primary	Not Employed	Employed	More female babies	More than 6 years	26,000 – 50,000	With Spouse’s extended family	9 months	Female	C- section	Government hospital	No	Yes	Yes	3	2	1	1	3	2	1	2	3	1	2	1	3	3	3	3	3	1	3	3	1	1	0	1	0	0	0	0	0	0	0	3	2	2
16-25	Urban	Primary	Not Employed	Not Employed	More male babies	2 to 6 years	26,000 – 50,000	With Spouse’s extended family	9 months	male	C- section	Government hospital	Yes	No	Yes	6	3	2	3	3	3	2	1	2	3	3	3	3	3	3	1	0	1	1	2	1	0	0	0	0	0	0	0	0	0	0	3	3	2
16-25	Urban	No Formal education	Not Employed	Not Employed	More female babies	More than 6 years	25,000 PKR or less	Own house	9 months	Female	C- section	Government hospital	No	No	Yes	4	2	1	3	4	3	2	3	1	4	1	3	3	1	0	3	0	1	3	1	1	0	0	0	1	0	0	0	0	0	0	2	3	2
26-34	Urban	Bachelors	Not Employed	Employed	More female babies	2 to 6 years	26,000 – 50,000	Own house	9 months	Female	C- section	Government hospital	No	No	Yes	1	3	2	1	2	3	3	2	1	3	3	0	3	0	3	3	3	3	3	2	1	0	0	0	0	0	0	0	0	0	0	3	2	3
26-34	Urban	Primary	Not Employed	Not Employed	More female babies	More than 6 years	26,000 – 50,000	With Spouse’s extended family	9 months	Female	C- section	Government hospital	Yes	No	Yes	2	1	3	2	3	4	1	4	4	4	3	1	0	0	1	3	3	3	1	1	1	0	0	0	0	0	0	0	1	0	0	3	2	1
26-34	Urban	No Formal education	Not Employed	Not Employed	More female babies	2 to 6 years	26,000 – 50,000	With Spouse’s extended family	9 months	Female	C- section	Government hospital	No	No	Yes	2	3	1	1	2	3	4	4	4	1	3	0	3	0	3	3	3	1	3	0	1	0	1	0	0	0	0	0	0	0	1	3	2	3
35-44	Rural	No Formal education	Not Employed	Not Employed	Equal number of male and female babies	More than 6 years	25,000 PKR or less	With Spouse’s extended family	9 months	male	C- section	Government hospital	No	No	Yes	2	3	1	3	2	1	2	3	1	3	3	3	1	3	1	0	3	3	3	3	1	0	0	0	1	0	0	0	0	0	1	2	3	3
16-25	Urban	Primary	Not Employed	Employed	More male babies	More than 6 years	25,000 PKR or less	With Spouse’s extended family	9 months	male	Simple Vaginal delivery (Normal)	Government hospital	Yes	No	Yes	2	3	4	1	3	2	4	3	2	1	3	0	3	0	3	0	3	3	1	1	1	1	0	0	0	0	0	0	0	0	0	3	2	3
26-34	Urban	Middle	Employed	Employed	Equal number of male and female babies	More than 6 years	25,000 PKR or less	With Spouse’s extended family	9 months	male	Simple Vaginal delivery (Normal)	Government hospital	No	No	Yes	2	1	3	1	2	3	4	4	6	4	3	3	2	1	0	3	3	3	2	3	1	0	0	0	0	0	0	0	0	0	0	2	3	2
26-34	Urban	Primary	Not Employed	Employed	More female babies	More than 6 years	26,000 – 50,000	With Spouse’s extended family	9 months	Female	C- section	Private hospital	No	No	Yes	1	6	1	3	4	3	2	1	3	3	3	3	3	3	3	3	3	3	3	0	1	0	0	0	0	0	0	0	0	0	0	3	2	2
35-44	Urban	Primary	Not Employed	Not Employed	More female babies	More than 6 years	26,000 – 50,000	With Spouse’s extended family	9 months	Female	C- section	Private hospital	Yes	No	Yes	4	4	3	4	5	5	2	2	3	5	3	3	0	3	0	3	3	3	3	3	1	0	1	0	0	0	0	0	0	0	0	3	2	3
35-44	Urban	No Formal education	Not Employed	Employed	More female babies	More than 6 years	50,000 – 1 lac PKR	Own house	9 months	male	Simple Vaginal delivery (Normal)	Home	Yes	No	Yes	6	7	6	5	6	7	6	7	7	6	0	0	3	3	3	3	3	3	1	1	1	1	0	1	0	0	0	0	0	0	0	3	2	3
26-34	Urban	Primary	Not Employed	Employed	More female babies	More than 6 years	26,000 – 50,000	Own house	Less than 9 months	Female	C- section	Government hospital	No	No	Yes	3	1	2	2	3	4	5	4	3	3	3	1	3	0	0	3	3	1	3	3	1	0	0	0	0	0	0	1	0	0	0	3	2	2
35-44	Urban	Middle	Not Employed	Employed	Equal number of male and female babies	2 to 6 years	26,000 – 50,000	With Spouse’s extended family	9 months	Female	C- section	Government hospital	No	No	Yes	1	3	2	3	2	1	1	2	5	3	3	1	3	0	3	0	3	3	3	1	1	1	0	0	0	0	0	0	0	0	1	2	3	2
35-44	Urban	Primary	Not Employed	Not Employed	More female babies	More than 6 years	26,000 – 50,000	With Spouse’s extended family	9 months	Female	C- section	Government hospital	No	No	Yes	2	6	3	4	4	3	2	3	3	2	3	0	3	1	1	3	1	1	3	1	1	0	0	0	0	0	0	0	0	0	1	3	2	3
26-34	Urban	Primary	Not Employed	Employed	More female babies	More than 6 years	26,000 – 50,000	With Spouse’s extended family	9 months	Female	C- section	Government hospital	No	No	Yes	3	6	7	3	3	3	3	4	3	3	0	3	3	3	0	3	3	1	3	0	1	1	0	0	0	0	0	0	0	0	0	3	2	3
35-44	Urban	Bachelors	Not Employed	Not Employed	More female babies	More than 6 years	25,000 PKR or less	With Spouse’s extended family	9 months	Female	C- section	Government hospital	No	No	Yes	2	7	3	7	4	3	2	4	7	3	2	1	3	1	3	3	1	3	3	3	1	1	0	0	0	0	0	0	0	0	0	3	2	3
35-44	Urban	Primary	Not Employed	Employed	More female babies	More than 6 years	26,000 – 50,000	With Spouse’s extended family	Less than 9 months	Female	C- section	Government hospital	No	No	Yes	2	4	6	4	3	3	4	4	3	3	3	1	1	3	3	0	3	1	1	1	1	0	0	0	0	0	0	0	0	0	0	3	2	2
16-25	Urban	Primary	Not Employed	Employed	More male babies	More than 6 years	26,000 – 50,000	With Spouse’s extended family	Less than 9 months	male	C- section	Government hospital	No	No	Yes	2	6	6	3	3	4	6	3	4	3	3	0	1	1	0	0	3	3	3	0	1	0	0	0	1	0	0	0	0	0	0	3	2	2
35-44	Urban	Middle	Not Employed	Employed	More male babies	2 to 6 years	25,000 PKR or less	Own house	Less than 9 months	male	C- section	Government hospital	No	No	Yes	2	3	4	3	4	3	2	2	3	4	3	0	3	3	3	3	1	1	3	2	1	0	0	0	0	0	0	0	0	0	0	0	3	3
35-44	Rural	Primary	Not Employed	Not Employed	More female babies	More than 6 years	25,000 PKR or less	With Spouse’s extended family	9 months	Female	C- section	Government hospital	No	No	Yes	2	6	6	3	4	4	1	1	6	1	3	3	0	0	3	3	3	3	1	3	1	1	0	1	0	0	0	0	0	0	0	3	3	2
26-34	Urban	Primary	Not Employed	Not Employed	More male babies	More than 6 years	25,000 PKR or less	Own house	Less than 9 months	male	C- section	Government hospital	No	Yes	Yes	2	7	7	6	7	7	6	7	7	7	3	3	1	0	3	1	3	1	0	3	1	1	0	0	0	0	0	0	0	0	0	2	3	3
16-25	Urban	No Formal education	Not Employed	Not Employed	More male babies	More than 6 years	25,000 PKR or less	With Spouse’s extended family	9 months	Female	C- section	Government hospital	No	No	Yes	3	7	6	5	1	4	6	5	7	4	3	1	0	1	0	0	3	3	3	3	1	1	0	0	0	0	0	0	0	0	0	0	2	3
26-34	Urban	Primary	Not Employed	Not Employed	More female babies	More than 6 years	25,000 PKR or less	With Spouse’s extended family	9 months	Female	C- section	Government hospital	No	No	Yes	2	3	2	7	6	5	7	6	5	6	3	1	0	3	3	3	1	0	3	3	1	0	0	0	0	0	0	0	0	0	0	3	2	1
35-44	Rural	No Formal education	Not Employed	Employed	No babies	2 to 6 years	26,000 – 50,000	With Spouse’s extended family	9 months	Female	Simple Vaginal delivery (Normal)	Government hospital	No	No	Yes	3	2	1	7	4	4	7	6	7	3	3	3	2	2	3	3	1	3	3	0	1	1	0	0	0	0	0	0	0	0	1	2	1	3
26-34	Urban	High School	Not Employed	Not Employed	More female babies	2 to 6 years	26,000 – 50,000	With Spouse’s extended family	Less than 9 months	male	C- section	Government hospital	No	No	Yes	2	3	7	6	6	4	1	2	7	2	3	3	0	3	3	3	3	3	1	0	1	1	0	0	0	0	0	0	0	0	1	3	1	2
26-34	Urban	Primary	Not Employed	Not Employed	More female babies	More than 6 years	25,000 PKR or less	Own house	Less than 9 months	male	C- section	Government hospital	No	No	Yes	2	4	3	1	4	2	1	4	3	3	1	3	3	0	0	1	0	3	3	0	1	0	0	0	0	0	0	1	0	0	1	2	3	2
26-34	Urban	Primary	Not Employed	Employed	More male babies	More than 6 years	26,000 – 50,000	With Spouse’s extended family	Less than 9 months	male	C- section	Government hospital	Yes	No	Yes	3	2	1	5	4	1	6	2	5	4	3	0	1	1	3	3	2	1	1	0	1	0	0	0	0	0	0	0	0	0	0	3	2	2
35-44	Urban	Primary	Not Employed	Employed	More female babies	More than 6 years	26,000 – 50,000	With Spouse’s extended family	9 months	Female	C- section	Government hospital	No	No	Yes	2	6	7	6	7	6	7	6	7	7	3	1	0	0	0	3	3	0	3	1	1	0	0	0	1	0	0	0	0	0	0	3	1	3
35-44	Urban	Primary	Not Employed	Not Employed	More female babies	More than 6 years	25,000 PKR or less	With Spouse’s extended family	Less than 9 months	Female	C- section	Government hospital	No	No	Yes	2	1	3	6	7	7	6	7	6	6	0	0	3	0	3	3	3	0	3	0	1	1	0	0	0	0	0	0	0	0	1	2	3	1
35-44	Rural	Middle	Employed	Employed	More male babies	2 to 6 years	26,000 – 50,000	With Spouse’s extended family	9 months	Female	C- section	Government hospital	No	No	Yes	7	6	6	7	6	7	7	6	6	7	3	3	3	3	1	1	3	3	3	3	1	0	1	0	0	0	0	0	0	0	0	0	3	2
35-44	Urban	Primary	Employed	Not Employed	Equal number of male and female babies	More than 6 years	26,000 – 50,000	With Spouse’s extended family	9 months	male	C- section	Government hospital	No	No	Yes	1	6	7	6	1	1	6	4	6	7	3	1	0	3	3	1	3	3	0	3	1	0	0	1	0	0	0	0	0	0	1	3	2	2
35-44	Urban	Middle	Employed	Employed	More female babies	2 to 6 years	26,000 – 50,000	Own house	Less than 9 months	Female	C- section	Government hospital	No	No	Yes	6	7	6	6	7	7	6	7	6	7	3	0	3	0	1	0	3	3	2	2	1	0	0	0	0	0	0	0	0	0	1	3	2	1
26-34	Urban	Middle	Not Employed	Employed	More male babies	More than 6 years	26,000 – 50,000	With Spouse’s extended family	9 months	male	C- section	Government hospital	Yes	Yes	Yes	7	6	4	7	4	6	7	7	6	7	2	1	2	3	0	1	1	3	3	1	1	0	0	0	0	0	0	0	0	0	1	2	3	1
26-34	Urban	Bachelors	Employed	Employed	More male babies	2 to 6 years	50,000 – 1 lac PKR	Own house	9 months	male	C- section	Private hospital	No	Yes	Yes	7	6	3	7	7	4	4	4	7	1	3	3	3	3	3	1	3	3	3		1	0	0	1	0	0	0	0	0	0	0	2	3	1
26-34	Urban	Masters or higher	Employed	Employed	More female babies	More than 6 years	26,000 – 50,000	With Spouse’s extended family	9 months	Female	C- section	Government hospital	No	No	Yes	3	2	6	3	4	1	6	3	6	3	1	3	0	3	3	3	0	0	0	0	1	0	0	0	0	0	0	0	0	0	1	3	2	3
35-44	Urban	Middle	Not Employed	Not Employed	More female babies	More than 6 years	25,000 PKR or less	With Spouse’s extended family	9 months	Female	Simple Vaginal delivery (Normal)	Government hospital	No	No	Yes	3	2	6	3	4	1	6	3	6	3	3	3	3	1	3	1	3	1	0	0	1	0	0	0	0	0	0	0	0	0	0	2	0	3
26-34	Urban	Primary	Not Employed	Employed	More male babies	More than 6 years	26,000 – 50,000	Own house	Less than 9 months	male	C- section	Government hospital	No	No	Yes	3	2	3	6	4	1	6	3	6	3	3	3	2	3	3	3	3	0	3	3	1	0	0	0	1	0	1	0	0	0	0	3	2	3
16-25	Urban	Bachelors	Not Employed	Not Employed	More male babies	More than 6 years	25,000 PKR or less	With Spouse’s extended family	9 months	male	C- section	Government hospital	Yes	No	Yes	3	2	6	3	4	1	6	3	6	3	3	0	0	3	3	3	3	0	0	2	1	0	0	1	0	0	0	0	0	0	1	0	1	2
35-44	Urban	No Formal education	Not Employed	Not Employed	More male babies	More than 6 years	25,000 PKR or less	With Spouse’s extended family	Less than 9 months	male	C- section	Private hospital	Yes	Yes	Yes	1	2	4	2	7	7	7	7	4	7	0	0	3	2	3	3	3	3	1	3	1	0	1	0	0	0	0	0	0	0	0	3	3	2
26-34	Urban	Bachelors	Not Employed	Employed	More female babies	More than 6 years	25,000 PKR or less	Own house	9 months	male	C- section	Government hospital	No	No	Yes	1	1	1	2	1	1	2	7	6	7	3	3	1	1	3	1	3	3	3	0	1	0	0	1	0	0	0	0	0	0	0	3	3	3
26-34	Urban	No Formal education	Not Employed	Not Employed	More female babies	More than 6 years	26,000 – 50,000	Own house	9 months	Female	C- section	Government hospital	No	No	Yes	5	1	2	3	5	2	7	3	2	3	1	3	3	3	3	3	3	3	0	1	1	0	1	0	0	0	0	0	0	0	1	3	2	3
16-25	Urban	Masters or higher	Not Employed	Employed	Equal number of male and female babies	More than 6 years	26,000 – 50,000	With Spouse’s extended family	9 months	Female	C- section	Government hospital	No	No	Yes	1	2	3	3	3	3	1	7	6	1	3	1	3	0	0	0	2	3	1	0	1	0	0	0	0	0	0	0	0	1	0	0	3	3
35-44	Urban	Bachelors	Not Employed	Not Employed	More female babies	More than 6 years	26,000 – 50,000	With Spouse’s extended family	Less than 9 months	Female	C- section	Government hospital	No	No	Yes	7	6	7	6	6	7	6	6	7	7	3	3	2	3	3	1	2	2	1	0	1	0	0	0	1	0	0	0	0	0	1	0	0	0
35-44	Urban	Primary	Not Employed	Not Employed	More male babies	More than 6 years	26,000 – 50,000	With Spouse’s extended family	9 months	Female	C- section	Government hospital	No	Yes	Yes	4	7	1	2	3	1	2	3	7	4	3	0	3	0	3	3	3	3	3	3	1	1	0	0	0	0	0	0	0	0	0	2	3	3
26-34	Urban	Primary	Not Employed	Employed	More male babies	More than 6 years	26,000 – 50,000	Own house	9 months	Female	Simple Vaginal delivery (Normal)	Government hospital	No	No	Yes	1	2	1	2	3	2	1	3	2	1	3	1	2	3	2	3	3	1	3	3	1	0	1	0	0	0	0	0	0	0	1	2	2	3
26-34	Urban	Primary	Not Employed	Employed	More female babies	More than 6 years	25,000 PKR or less	With Spouse’s extended family	9 months	Female	Simple Vaginal delivery (Normal)	Private hospital	No	No	Yes	2	1	2	1	2	3	2	3	1	2	3	3	3	3	3	3	3	0	0	0	1	0	0	0	0	0	0	0	0	0	1	3	2	3
26-34	Urban	High School	Not Employed	Employed	More female babies	2 to 6 years	25,000 PKR or less	With Spouse’s extended family	9 months	Female	C- section	Government hospital	No	Yes	Yes	2	3	6	6	7	6	7	7	1	6	1	1	1	3	1	3	1	1	3	3	1	0	1	0	0	0	0	0	0	0	0	3	2	3
26-34	Urban	Primary	Not Employed	Employed	More male babies	More than 6 years	26,000 – 50,000	With Spouse’s extended family	9 months	Female	Simple Vaginal delivery (Normal)	Private hospital	No	No	Yes	4	4	4	4	4	4	4	4	4	4	3	1	0	2	2	3	3	0	3	1	1	0	0	0	0	0	0	0	0	0	1	0	2	1
26-34	Urban	Middle	Not Employed	Not Employed	More female babies	More than 6 years	26,000 – 50,000	With Spouse’s extended family	9 months	male	C- section	Private hospital	No	No	Yes	1	6	7	3	4	2	2	7	2	1	3	0	2	0	3	1	1	3	2	0	1	0	0	0	0	0	0	0	0	0	1	0	1	1
26-34	Urban	Middle	Not Employed	Not Employed	More male babies	More than 6 years	26,000 – 50,000	With Spouse’s extended family	Less than 9 months	male	Simple Vaginal delivery (Normal)	Government hospital	No	No	Yes	7	6	5	7	5	6	5	6	5	7	3	1	0	1	0	0	1	3	3	0	1	1	1	0	0	0	0	0	0	0	0	3	3	2
16-25	Rural	Primary	Not Employed	Employed	More male babies	2 to 6 years	26,000 – 50,000	With Spouse’s extended family	Less than 9 months	male	Simple Vaginal delivery (Normal)	Private hospital	Yes	No	Yes	2	3	7	6	4	4	6	1	7	7	1	1	3	0	2	3	3	1	2	2	1	0	0	0	0	0	0	0	0	0	0	0	2	2
26-34	Urban	Bachelors	Not Employed	Employed	More female babies	2 to 6 years	50,000 – 1 lac PKR	With Spouse’s extended family	Less than 9 months	male	Simple Vaginal delivery (Normal)	Private hospital	No	No	Yes	7	7	7	7	7	7	7	7	7	7	1	3	2	3	3	3	3	1	3	1	1	1	0	0	1	0	0	0	0	0	0	2	3	3
26-34	Urban	Primary	Not Employed	Employed	More female babies	More than 6 years	25,000 PKR or less	With Spouse’s extended family	9 months	Female	Simple Vaginal delivery (Normal)	Government hospital	No	No	Yes	4	1	2	3	3	1	1	1	1	2	3	0	3	3	3	3	3	0	0	0	1	0	0	0	0	0	0	0	1	0	0	0	0	3
35-44	Urban	High School	Not Employed	Not Employed	More female babies	More than 6 years	26,000 – 50,000	With Spouse’s extended family	Less than 9 months	Female	C- section	Government hospital	No	No	Yes	7	2	7	2	1	2	4	4	2	1	3	1	1	3	1	1	3	0	3	0	1	0	0	0	0	0	0	0	0	0	0	1	1	3
26-34	Urban	Primary	Not Employed	Employed	More male babies	2 to 6 years	26,000 – 50,000	With Spouse’s extended family	9 months	Female	C- section	Government hospital	No	No	Yes	2	6	4	4	3	3	4	3	6	4	0	1	3	3	0	2	3	3	0	0	1	0	0	0	0	0	0	0	0	0	1	3	1	3
26-34	Urban	Bachelors	Employed	Not Employed	More female babies	2 to 6 years	25,000 PKR or less	With Spouse’s extended family	9 months	Female	C- section	Government hospital	No	Yes	Yes	3	2	6	3	4	1	6	3	6	3	3	3	1	3	3	3	3	3	0	0	1	0	0	0	1	0	0	0	0	0	0	1	2	2
26-34	Urban	High School	Not Employed	Employed	More male babies	More than 6 years	25,000 PKR or less	With Spouse’s extended family	Less than 9 months	Female	C- section	Government hospital	No	No	Yes	2	3	5	2	1	1	2	4	7	2	3	1	0	1	3	1	1	1	1	3	1	0	0	0	0	0	0	0	0	0	1	3	0	3
26-34	Urban	Middle	Not Employed	Employed	More female babies	More than 6 years	26,000 – 50,000	With Spouse’s extended family	9 months	Female	C- section	Government hospital	No	No	Yes	3	6	6	3	4	3	4	1	3	3	3	3	1	1	0	3	1	3	3	3	1	0	0	0	0	0	0	0	0	0	0	1	3	3
26-34	Urban	No Formal education	Not Employed	Employed	Equal number of male and female babies	2 to 6 years	26,000 – 50,000	With Spouse’s extended family	9 months	Female	Simple Vaginal delivery (Normal)	Government hospital	No	Yes	Yes	7	6	6	7	6	4	7	7	6	6	0	1	2	2	3	1	2	3	3	3	1	1	0	0	0	0	0	0	0	0	0	3	1	2
26-34	Urban	Middle	Not Employed	Employed	More female babies	More than 6 years	26,000 – 50,000	With Spouse’s extended family	9 months	Female	C- section	Private hospital	No	No	Yes	3	2	2	6	7	7	1	2	7	4	3	3	2	1	3	3	3	3	1	3	1	1	0	0	0	0	0	0	0	0	0	0	3	2
26-34	Urban	Primary	Not Employed	Not Employed	More female babies	More than 6 years	26,000 – 50,000	With Spouse’s extended family	Less than 9 months	Female	Simple Vaginal delivery (Normal)	Government hospital	No	No	Yes	1	3	6	7	6	4	4	1	7	2	3	1	1	3	3	3	1	3	1	3	1	0	0	0	0	0	0	0	0	0	0	0	0	2
16-25	Urban	No Formal education	Not Employed	Not Employed	More female babies	More than 6 years	26,000 – 50,000	With Spouse’s extended family	9 months	Female	C- section	Government hospital	No	No	Yes	6	1	2	7	4	4	6	4	5	4	3	3	3	3	1	3	0	3	0	0	1	0	1	0	0	0	0	0	0	0	0	3	2	2
26-34	Urban	Middle	Not Employed	Employed	More female babies	Less than one year	26,000 – 50,000	With Spouse’s extended family	9 months	Female	Simple Vaginal delivery (Normal)	Government hospital	Yes	No	Yes	1	7	2	4	4	4	2	6	4	4	3	1	2	1	3	2	3	0	3	3	1	0	0	1	0	0	0	0	0	0	1	3	2	0
26-34	Urban	High School	Not Employed	Not Employed	More female babies	More than 6 years	26,000 – 50,000	With Spouse’s extended family	Less than 9 months	Female	C- section	Government hospital	No	No	Yes	3	2	6	2	6	4	4	4	2	4	3	3	2	3	2	3	3	0	2	3	1	0	0	0	0	0	0	0	0	0	0	2	3	1
16-25	Urban	Primary	Not Employed	Employed	More male babies	2 to 6 years	26,000 – 50,000	With Spouse’s extended family	9 months	Female	C- section	Government hospital	No	No	Yes	3	2	1	2	4	5	3	3	1	2	1	0	0	3	3	3	3	3	3	3	1	0	0	0	0	0	0	0	0	0	1	0	0	0
26-34	Urban	No Formal education	Not Employed	Employed	More male babies	More than 6 years	25,000 PKR or less	With Spouse’s extended family	Less than 9 months	male	C- section	Government hospital	No	Yes	Yes	3	2	1	2	1	3	6	1	3	1	3	0	3	0	1	1	3	0	3	3	1	0	0	0	0	0	0	0	0	0	1	3	3	3
26-34	Urban	High School	Not Employed	Employed	More female babies	2 to 6 years	25,000 PKR or less	With Spouse’s extended family	9 months	Female	C- section	Government hospital	No	Yes	Yes	1	7	1	7	4	4	4	4	4	1	0	0	0	0	3	3	3	3	3	3	1	0	0	0	0	0	0	0	0	0	1	0	3	2
16-25	Rural	Bachelors	Not Employed	Employed	More female babies	2 to 6 years	25,000 PKR or less	Own house	Less than 9 months	Female	C- section	Government hospital	No	No	Yes	3	6	1	6	4	3	1	2	2	1	2	3	3	0	3	3	3	0	3	3	1	0	0	0	0	0	0	0	0	0	1	2	0	3
26-34	Urban	No Formal education	Not Employed	Not Employed	More male babies	More than 6 years	26,000 – 50,000	With Spouse’s extended family	Less than 9 months	Female	C- section	Government hospital	No	No	Yes	2	6	7	6	4	4	7	6	7	6	1	0	0	1	3	1	3	3	3	0	1	0	0	0	0	0	0	0	0	0	1	3	2	1
26-34	Urban	Middle	Not Employed	Employed	More female babies	2 to 6 years	26,000 – 50,000	With Spouse’s extended family	9 months	Female	C- section	Government hospital	Yes	No	Yes	7	6	3	4	4	4	3	4	2	4	2	3	3	1	1	2	2	3	1	0	1	1	0	0	0	0	0	0	0	0	0	0	3	3
26-34	Urban	No Formal education	Not Employed	Not Employed	More male babies	More than 6 years	26,000 – 50,000	Own house	9 months	male	C- section	Government hospital	No	No	Yes	3	2	3	2	4	4	7	4	7	4	1	0	0	3	3	1	3	1	2	3	1	0	0	0	0	0	0	0	0	0	1	2	3	2
45+	Urban	No Formal education	Employed	Employed	More male babies	2 to 6 years	26,000 – 50,000	Own house	9 months	male	C- section	Government hospital	No	No	Yes	1	2	6	2	3	2	3	3	2	4	3	3	1	3	3	0	2	2	2	2	1	0	0	0	0	0	0	0	0	0	1	3	1	1
35-44	Urban	No Formal education	Not Employed	Employed	Equal number of male and female babies	2 to 6 years	25,000 PKR or less	With Spouse’s extended family	9 months	male	Simple Vaginal delivery (Normal)	Government hospital	No	No	Yes	3	2	6	3	4	1	6	3	6	3	1	0	3	3	3	0	3	3	1	3	1	0	0	0	0	0	0	0	0	0	0	3	2	2
26-34	Urban	Primary	Not Employed	Not Employed	More male babies	2 to 6 years	25,000 PKR or less	With Spouse’s extended family	9 months	Female	C- section	Government hospital	No	No	Yes	3	4	4	3	4	4	1	2	3	2	3	3	3	1	3	2	3	3	3	3	1	0	0	0	0	0	0	0	0	0	1	2	3	1
26-34	Urban	Middle	Not Employed	Employed	More female babies	2 to 6 years	26,000 – 50,000	With Spouse’s extended family	9 months	Female	C- section	Government hospital	No	No	Yes	3	2	3	1	3	2	1	3	2	1	3	3	1	1	1	1	1	3	3	3	1	0	0	0	0	0	0	0	0	0	0	3	2	3
26-34	Urban	Middle	Not Employed	Employed	Equal number of male and female babies	More than 6 years	26,000 – 50,000	With Spouse’s extended family	9 months	Female	C- section	Government hospital	No	No	Yes	3	2	1	2	3	1	2	3	2	3	3	0	3	2	3	3	3	1	3	3	1	0	0	0	0	0	0	0	0	0	0	2	3	1
26-34	Urban	No Formal education	Not Employed	Employed	More male babies	2 to 6 years	25,000 PKR or less	With Spouse’s extended family	9 months	male	Simple Vaginal delivery (Normal)	Government hospital	No	No	Yes	3	2	3	1	1	2	1	3	3	3	2	3	3	0	3	3	3	0	3	3	1	1	0	0	0	0	0	0	0	0	0	2	1	3
35-44	Rural	Bachelors	Employed	Employed	More female babies	More than 6 years	26,000 – 50,000	With Spouse’s extended family	9 months	Female	C- section	Government hospital	No	No	Yes	2	3	2	7	7	1	2	3	7	1	3	1	0	0	3	3	2	3	3	1	1	0	0	0	0	0	0	0	0	0	1	2	3	2
26-34	Urban	Primary	Not Employed	Employed	More male babies	2 to 6 years	26,000 – 50,000	With Spouse’s extended family	9 months	Female	C- section	Government hospital	No	No	Yes	2	1	3	3	4	1	4	4	6	3	3	3	3	0	3	0	3	2	1	2	1	0	0	1	0	0	0	0	0	0	0	3	0	3
26-34	Urban	Primary	Not Employed	Not Employed	More female babies	More than 6 years	26,000 – 50,000	With Spouse’s extended family	Less than 9 months	male	C- section	Government hospital	No	No	Yes	4	6	4	3	4	4	2	1	2	3	3	3	2	1	0	3	2	1	3	3	1	1	0	0	0	0	0	0	0	0	1	3	2	3
16-25	Urban	Middle	Not Employed	Employed	No babies	More than 6 years	26,000 – 50,000	Own house	Less than 9 months	Female	C- section	Government hospital	No	No	Yes	1	7	1	6	2	2	1	2	7	2	3	0	2	0	3	3	0	3	3	1	1	0	0	0	0	0	0	0	0	0	0	2	3	0
26-34	Urban	Middle	Not Employed	Employed	More female babies	More than 6 years	25,000 PKR or less	With Spouse’s extended family	9 months	Female	C- section	Government hospital	No	No	Yes	2	6	4	7	6	6	3	6	1	7	2	1	2	3	2	3	0	0	3	1	1	0	1	0	0	0		0	0	0	0	3	0	2
16-25	Rural	Primary	Not Employed	Employed	More female babies	2 to 6 years	26,000 – 50,000	With Spouse’s extended family	9 months	Female	Simple Vaginal delivery (Normal)	Government hospital	No	No	Yes	6	3	2	7	7	1	6	1	6	4	0	2	3	1	1	3	1	1	0	3	1	0	0	0	0	0	0	0	0	0	1	2	0	3
26-34	Urban	Middle	Not Employed	Not Employed	More female babies	2 to 6 years	26,000 – 50,000	Own house	9 months	Female	C- section	Government hospital	No	No	Yes	3	2	6	3	4	1	6	5	6	3	1	3	0	3	3	0	1	1	0	0	1	0	0	0	0	0	0	0	0	0	0	1	3	0
26-34	Urban	Bachelors	Not Employed	Not Employed	More female babies	More than 6 years	26,000 – 50,000	With Spouse’s extended family	9 months	Female	C- section	Government hospital	No	No	Yes	2	3	6	7	4	3	6	2	7	3	0	3	0	3	0	3	0	3	0	2	1	0	0	0	0	0	0	0	0	0	1	2	0	3
26-34	Urban	Primary	Not Employed	Employed	More female babies	More than 6 years	26,000 – 50,000	With Spouse’s extended family	9 months	Female	C- section	Government hospital	Yes	No	Yes	1	2	3	2	3	1	3	2	1	3	1	2	1	1	0	2	1	3	1	0	1	0	0	1	0	0	0	0	0	0	0	0	1	0
26-34	Urban	Bachelors	Not Employed	Employed	More male babies	Less than one year	26,000 – 50,000	With Spouse’s extended family	9 months	male	C- section	Government hospital	Yes	No	Yes	2	3	1	3	4	1	3	1	2	4	1	1	3	1	3	2	3	0	0	0	1	0	0	0	0	0	0	0	0	1	0	2	1	1
35-44	Rural	High School	Not Employed	Employed	More female babies	More than 6 years	26,000 – 50,000	With Spouse’s extended family	Less than 9 months	Female	Simple Vaginal delivery (Normal)	Government hospital	No	No	Yes	3	2	3	1	4	3	1	2	3	4	3	3	3	0	1	3	0	1	0	0	1	0	0	0	0	0	0	0	0	0	0	0	2	3
35-44	Rural	No Formal education	Not Employed	Employed	More female babies	More than 6 years	26,000 – 50,000	With Spouse’s extended family	9 months	Female	C- section	Government hospital	No	No	Yes	6	7	6	7	6	7	1	6	7	6	3	3	0	3	3	1	0	1	3	3	1	0	0	0	0	0	0	0	0	0	0	1	3	1
26-34	Urban	Primary	Not Employed	Employed	More male babies	2 to 6 years	26,000 – 50,000	With Spouse’s extended family	9 months	Female	Simple Vaginal delivery (Normal)	Government hospital	No	No	Yes	3	4	2	4	6	7	4	5	7	6	3	0	3	3	1	2	3	0	0	0	1	0	0	0	0	0	0	0	0	1	0	0	2	3
26-34	Urban	Bachelors	Employed	Not Employed	More female babies	2 to 6 years	26,000 – 50,000	With Spouse’s extended family	9 months	Female	C- section	Government hospital	No	Yes	Yes	7	6	4	7	6	6	2	6	6	1	3	3	0	0	3	1	3	1	3	0	1	0	1	0	0	0	0	0	0	0	0	3	2	0
35-44	Urban	No Formal education	Not Employed	Not Employed	More female babies	2 to 6 years	26,000 – 50,000	With Spouse’s extended family	9 months	Female	C- section	Government hospital	No	No	Yes	4	6	7	4	4	4	6	4	6	7	3	0	3	0	0	3	3	1	3	0	1	0	0	0	0	0	0	0	0	0	0	3	2	1
26-34	Urban	No Formal education	Not Employed	Employed	No babies	2 to 6 years	25,000 PKR or less	Own house	9 months	Female	C- section	Government hospital	No	No	Yes	2	3	1	2	1	3	3	4	2	1	3	3	3	3	3	3	3	1	3	1	1	0	1	0	0	0	0	0	0	0	0	3	2	1
26-34	Urban	No Formal education	Not Employed	Not Employed	More female babies	More than 6 years	25,000 PKR or less	With Spouse’s extended family	Less than 9 months	Female	Simple Vaginal delivery (Normal)	Private hospital	No	No	Yes	1	3	6	3	4	4	6	4	4	4	3	0	3	3	3	3	0	3	3	2	1	0	0	0	0	0	0	0	0	0	0	3	2	1
26-34	Urban	Primary	Not Employed	Not Employed	More male babies	More than 6 years	26,000 – 50,000	With Spouse’s extended family	9 months	Female	C- section	Government hospital	No	No	Yes	7	6	4	3	4	1	4	4	5	2	1	3	1	0	3	1	3	0	0	3	1	0	1	0	0	0	0	0	0	0	0	2	3	1
26-34	Urban	Primary	Not Employed	Not Employed	More male babies	2 to 6 years	26,000 – 50,000	With Spouse’s extended family	9 months	male	C- section	Government hospital	Yes	No	Yes	7	1	2	4	2	4	7	6	2	4	3	3	0	2	3	1	3	0	0	1	1	1	0	0	0	0	0	0	0	0	1	3	2	1
35-44	Urban	Bachelors	Employed	Not Employed	Equal number of male and female babies	More than 6 years	26,000 – 50,000	With Spouse’s extended family	9 months	Female	Simple Vaginal delivery (Normal)	Government hospital	No	No	Yes	4	6	3	6	4	3	6	2	3	4	0	1	1	3	3	3	3	3	0	3	1	0	0	0	0	0	0	0	0	0	0	2	3	2
35-44	Urban	No Formal education	Not Employed	Not Employed	Equal number of male and female babies	More than 6 years	26,000 – 50,000	With Spouse’s extended family	9 months	Female	C- section	Government hospital	No	No	Yes	4	2	3	6	7	6	7	6	7	1	1	1	3	3	3	1	3	3	3	3	1	0	0	0	0	0	0	0	0	0	0	3	2	3
26-34	Urban	Bachelors	Not Employed	Employed	More male babies	More than 6 years	25,000 PKR or less	Own house	Less than 9 months	Female	C- section	Government hospital	No	Yes	Yes	2	3	1	3	1	3	1	3	7	2	3	0	0	3	3	1	3	1	3	1	1	0	0	0	0	0	0	0	0	1	1	1	3	3
26-34	Urban	Bachelors	Not Employed	Employed	More male babies	More than 6 years	26,000 – 50,000	With Spouse’s extended family	Less than 9 months	Female	C- section	Government hospital	No	No	Yes	7	6	3	7	6	1	7	6	4	6	3	3	3	1	3	3	3	1	1	0	1	1	0	0	0	0	0	0	0	0	0	0	0	3
26-34	Urban	Bachelors	Employed	Employed	More female babies	More than 6 years	50,000 – 1 lac PKR	With Spouse’s extended family	9 months	Female	C- section	Government hospital	No	No	Yes	7	6	2	1	3	7	6	7	1	7	3	1	1	3	1	0	3	3	0	3	1	1	0	0	0	0	0	0	0	0	0	0	1	0
26-34	Urban	Primary	Not Employed	Employed	Equal number of male and female babies	2 to 6 years	26,000 – 50,000	Own house	Less than 9 months	Female	C- section	Government hospital	Yes	Yes	Yes	6	6	7	1	7	6	2	7	1	4	3	0	3	3	0	3	1	3	0	3	1	1	0	0	0	0	0	0	0	0	0	3	2	1
16-25	Urban	No Formal education	Not Employed	Employed	No babies	More than 6 years	26,000 – 50,000	Own house	Less than 9 months	male	C- section	Government hospital	No	No	Yes	1	3	6	1	7	1	1	2	2	4	3	0	3	3	3	3	1	3	1	0	1	0	0	0	0	0	0	0	0	0	1	3	0	2
35-44	Urban	Bachelors	Not Employed	Not Employed	More female babies	More than 6 years	26,000 – 50,000	With Spouse’s extended family	9 months	Female	C- section	Government hospital	No	No	Yes	2	1	3	1	4	7	7	4	1	6	3	0	3	3	1	3	0	3	3	3	1	0	0	0	0	0	0	0	0	0	0	3	0	3
26-34	Urban	Primary	Not Employed	Not Employed	Equal number of male and female babies	More than 6 years	26,000 – 50,000	With Spouse’s extended family	9 months	Female	C- section	Government hospital	No	No	Yes	7	6	7	2	4	4	2	6	2	4	1	0	2	3	1	3	0	1	2	0	1	0	0	0	0	0	0	0	0	0	1	2	3	0
26-34	Urban	High School	Not Employed	Not Employed	More male babies	More than 6 years	26,000 – 50,000	With Spouse’s extended family	9 months	Female	C- section	Government hospital	No	No	Yes	1	6	2	5	2	6	3	2	6	2	2	0	0	3	1	1	3	1	0	2	1	1	0	0	0	0	0	1	0	0	0	0	1	2
26-34	Urban	Primary	Not Employed	Not Employed	Equal number of male and female babies	2 to 6 years	26,000 – 50,000	With Spouse’s extended family	9 months	Female	C- section	Government hospital	No	No	Yes	4	1	3	6	2	3	6	3	4	3	2	3	0	0	2	3	1	2	1	0	1	0	0	0	0	0	0	0	0	0	0	3	0	2
35-44	Urban	No Formal education	Not Employed	Employed	More female babies	More than 6 years	50,000 – 1 lac PKR	With Spouse’s extended family	Less than 9 months	Female	C- section	Government hospital	No	Yes	Yes	6	3	7	3	7	2	7	3	6	4	1	2	0	1	3	1	3	1	3	0	1	1	0	0	0	0	0	0	0	0	0	0	2	3
26-34	Urban	Middle	Employed	Not Employed	Equal number of male and female babies	More than 6 years	50,000 – 1 lac PKR	With Spouse’s extended family	Less than 9 months	male	C- section	Government hospital	No	No	Yes	2	1	6	2	7	3	1	6	7	4	3	3	2	3	3	1	1	3	1	1	1	0	0	0	0	0	0	0	0	0	0	2	3	1
26-34	Urban	Primary	Not Employed	Employed	Equal number of male and female babies	2 to 6 years	26,000 – 50,000	With Spouse’s extended family	9 months	Female	C- section	Government hospital	No	No	Yes	4	6	2	6	2	6	2	6	7	2	2	0	1	3	1	0	3	2	0	0	1	0	0	0	0	0	0	0	0	0	1	3	0	1
26-34	Urban	No Formal education	Not Employed	Employed	More female babies	More than 6 years	26,000 – 50,000	With Spouse’s extended family	Less than 9 months	Female	C- section	Government hospital	No	No	Yes	2	6	1	3	4	3	1	2	4	1	2	3	0	1	1	3	3	1	3	0	1	0	0	0	0	0	0	0	0	0	1	3	1	2
26-34	Urban	Primary	Not Employed	Employed	More female babies	More than 6 years	26,000 – 50,000	Own house	Less than 9 months	Female	C- section	Government hospital	No	No	Yes	5	3	2	5	4	1	4	6	2	1	3	0	1	3	3	0	3	1	3	1	1	0	0	0	0	0	0	0	0	0	1	3	2	0
26-34	Urban	Middle	Not Employed	Employed	More female babies	2 to 6 years	26,000 – 50,000	With Spouse’s extended family	9 months	Female	C- section	Government hospital	No	No	Yes	6	7	6	7	6	4	2	3	4	4	3	0	2	2	3	1	3	3	1	0	1	0	0	0	1	0	0	1	0	0	1	3	2	2
26-34	Urban	No Formal education	Not Employed	Not Employed	More male babies	More than 6 years	26,000 – 50,000	With Spouse’s extended family	9 months	Female	C- section	Government hospital	No	No	Yes	4	6	7	6	3	3	6	1	4	3	1	3	3	1	3	1	3	1	0	0	1	0	0	0	0	0	0	0	0	1	0	0	2	3
26-34	Urban	Bachelors	Not Employed	Employed	Equal number of male and female babies	2 to 6 years	26,000 – 50,000	With Spouse’s extended family	9 months	male	C- section	Government hospital	No	Yes	Yes	1	3	2	7	4	4	2	6	2	3	0	1	1	0	3	3	0	3	0	2	1	1	0	1	1	0	0	0	0	0	0	2	3	1
26-34	Urban	Bachelors	Not Employed	Not Employed	More female babies	Less than one year	26,000 – 50,000	With Spouse’s extended family	9 months	Female	C- section	Government hospital	No	No	Yes	6	2	6	4	2	4	6	3	2	2	3	2	0	0	1	3	2	3	3	0	1	0	0	0	1	0	0	0	0	0	1	3	3	2
35-44	Urban	Bachelors	Not Employed	Not Employed	Equal number of male and female babies	2 to 6 years	50,000 – 1 lac PKR	With Spouse’s extended family	9 months	Female	Simple Vaginal delivery (Normal)	Private hospital	No	No	Yes	3	4	6	7	4	7	7	6	4	4	0	2	3	3	3	1	2	0	0	2	1	0	0	0	0	0	0	0	0	0	1	3	2	2
26-34	Urban	Primary	Not Employed	Not Employed	More female babies	2 to 6 years	26,000 – 50,000	With Spouse’s extended family	9 months	Female	C- section	Government hospital	No	No	Yes	6	2	1	6	2	3	2	3	7	2	3	1	3	1	0	0	3	3	0	1	1	0	0	0	1	0	0	0	0	0	0	3	2	3
35-44	Urban	No Formal education	Not Employed	Not Employed	Equal number of male and female babies	More than 6 years	26,000 – 50,000	With Spouse’s extended family	Less than 9 months	Female	C- section	Private hospital	No	No	Yes	2	3	6	7	3	4	2	3	4	4	3	3	0	3	0	0	3	2	1	3	1	1	0	0	0	0	0	0	0	0	1	1	3	2
35-44	Urban	High School	Not Employed	Employed	Equal number of male and female babies	More than 6 years	50,000 – 1 lac PKR	With Spouse’s extended family	Less than 9 months	Female	C- section	Government hospital	No	No	Yes	2	3	6	7	4	4	6	6	4	7	3	3	3	3	3	3	0	0	3	3	1	0	0	0	0	1	0	0	0	0	0	1	2	3
35-44	Urban	Middle	Not Employed	Not Employed	More female babies	2 to 6 years	50,000 – 1 lac PKR	With Spouse’s extended family	9 months	Female	C- section	Government hospital	No	No	Yes	2	1	3	1	3	2	2	7	2	2	0	0	3	3	3	3	3	3	2	3	1	1	0	0	0	0	0	0	0	0	1	2	3	2
35-44	Rural	Primary	Not Employed	Not Employed	Equal number of male and female babies	2 to 6 years	26,000 – 50,000	With Spouse’s extended family	9 months	Female	C- section	Government hospital	No	No	Yes	4	2	4	4	6	7	4	6	6	6	2	2	3	2	1	0	0	0	3	3	1	1	0	0	0	0	0	0	0	0	1	3	1	3
26-34	Urban	Middle	Not Employed	Employed	More male babies	More than 6 years	More than 1 lac PKR	With Spouse’s extended family	Less than 9 months	Female	C- section	Government hospital	No	No	Yes	6	7	6	7	7	6	1	7	6	4	3	2	0	3	3	3	1	2	1	3	1	0	1	0	0	0	0	0	0	0	0	3	3	3
26-34	Urban	No Formal education	Not Employed	Employed	More female babies	More than 6 years	26,000 – 50,000	With Spouse’s extended family	9 months	male	C- section	Government hospital	No	Yes	Yes	6	7	4	6	7	4	6	4	6	7	3	0	0	3	3	1	3	3	1	0	1	0	0	0	0	0	0	0	0	1	0	2	3	3
35-44	Urban	Bachelors	Not Employed	Employed	Equal number of male and female babies	More than 6 years	50,000 – 1 lac PKR	With Spouse’s extended family	9 months	Female	C- section	Government hospital	No	No	Yes	1	3	3	7	6	7	4	6	7	6	1	0	3	3	3	2	3	1	3	1	1	0	0	0	0	0	0	0	0	0	1	0	2	3
16-25	Urban	Primary	Not Employed	Employed	More male babies	More than 6 years	26,000 – 50,000	With Spouse’s extended family	9 months	male	C- section	Private hospital	Yes	No	Yes	6	7	7	6	6	6	7	7	6	7	3	1	3	3	3	0	3	3	1	3	1	0	0	0	0	0	0	0	1	1	1	2	2	3
26-34	Urban	Bachelors	Not Employed	Employed	More female babies	More than 6 years	26,000 – 50,000	With Spouse’s extended family	9 months	Female	C- section	Government hospital	No	No	Yes	6	6	1	3	3	4	3	4	1	3	2	3	2	3	2	3	3	3	0	2	1	0	1	0	0	0	0	0	0	1	1	2	0	3
26-34	Urban	Middle	Not Employed	Not Employed	More female babies	Less than one year	26,000 – 50,000	With Spouse’s extended family	9 months	Female	C- section	Government hospital	Yes	No		5	5	5	5	5	5	5	5	5	5	1	2	1	1	1	1	3	3	3	3	1	0	0	0	0	0	0	0	0	0	0	2	0	2
[truncated: 24 more columns]
